# Supplementary material for: Anti-selective [3+2] (Hetero)annulation of non-conjugated alkenes via directed nucleopalladation
Source: PubMed Central journal article supplement (PMC7755910; doi:10.1038/s41467-020-20182-4), 2020-12-22
Supplement: 41467_2020_20182_MOESM1_ESM.pdf [file 41467_2020_20182_MOESM1_ESM.pdf]

## SUPPLEMENTARY INFORMATION

### ***Anti-Selective [3+2] (Hetero)annulation of Non-Conjugated Alkenes via Directed Nucleopalladation***

Hui-Qi Ni<sup>†</sup>, Ilia Kevlishvili<sup>‡</sup>, Pranali G. Bedekar<sup>†</sup>, Joyann S. Barber<sup>§</sup>, Shouliang Yang<sup>§</sup>, Michelle Tran-Dubé<sup>§</sup>, Andrew M. Romine<sup>†</sup>, Hou-Xiang Lu<sup>†</sup>, Indrawan J. McAlpine<sup>§\*</sup>, Peng Liu<sup>‡\*</sup>, and Keary M. Engle<sup>†\*</sup>

<sup>†</sup>Department of Chemistry, Scripps Research, 10550 North Torrey Pines Road, La Jolla, California 92037, United States

<sup>‡</sup>Department of Chemistry, University of Pittsburgh, Pittsburgh, Pennsylvania 15260, United States

<sup>§</sup>Pfizer Oncology Medicinal Chemistry, 10770 Science Center Drive, San Diego, California 92121, United States

\* indrawan.mcalpine@pfizer.com; pengliu@pitt.edu; keary@scripps.edu

#### Table of Contents

|                                                                         |       |
|-------------------------------------------------------------------------|-------|
| General Information.....                                                | S-2   |
| Experimental Procedures.....                                            | S-2   |
| Alkene Substrate Synthesis.....                                         | S-2   |
| Protected <i>ortho</i> -Iodoaniline Synthesis.....                      | S-5   |
| C-Nucleophile Synthesis.....                                            | S-5   |
| Reaction Optimization Details.....                                      | S-6   |
| Mechanistic Experiments.....                                            | S-9   |
| Competition Experiments.....                                            | S-14  |
| General Procedure A for [3+2] 2,3-Dihydrobenzofuran Synthesis.....      | S-15  |
| General Procedure B for [3+2] Indoline Synthesis.....                   | S-22  |
| General Procedure C for [3+2] Indane Synthesis.....                     | S-33  |
| General Procedure D for [3+2] Reactions with NHPA Directing groups..... | S-34  |
| General Procedure E for Deprotection of AQ Directing Group.....         | S-37  |
| Procedure F for 50 mmol-Scale Reaction.....                             | S-38  |
| Unsuccessful Examples.....                                              | S-39  |
| X-Ray Crystallography.....                                              | S-40  |
| Computational Details.....                                              | S-77  |
| Additional Computational Results.....                                   | S-77  |
| NMR Spectra.....                                                        | S-82  |
| References.....                                                         | S-142 |

## GENERAL INFORMATION

Unless otherwise noted, all materials were used as received from commercial sources without further purification. All *ortho*-iodophenols and *ortho*-iodoanilines were purchased from Combi-Blocks or obtained from the internal Pfizer compound library. HFIP (99.5%) was purchased from Oakwood Products Inc. Pd(OAc)<sub>2</sub> was obtained from Johnson Matthey. Thin layer chromatography (TLC) was conducted with EMD gel 60 F254 pre-coated plates (0.25 mm) and visualized using a combination of UV light. Preparative thin layer chromatography (TLC) was conducted with Analtech silica gel GF UV254 pre-coated plates (1.0 mm) and visualized using UV light. Silicycle Siliaflash P60 (particle size 0.040–0.063 mm) was used for flash column chromatography. NMR spectra were recorded on Bruker AV-400, DRX500 and AV-600 instruments. Spectra were internally referenced to SiMe<sub>4</sub> or solvent signals. The following abbreviations (or combinations thereof) were used to explain multiplicities: s = singlet, d = doublet, t = triplet, q = quartet, p = pentet, m = multiplet. High-resolution mass spectra (HRMS) for new compounds were recorded on an Agilent LC/MSD TOF mass spectrometer.

## EXPERIMENTAL PROCEDURES

### Alkene Substrate Synthesis

**Supplementary Table 1.** Alkene substrates **1a–i**.

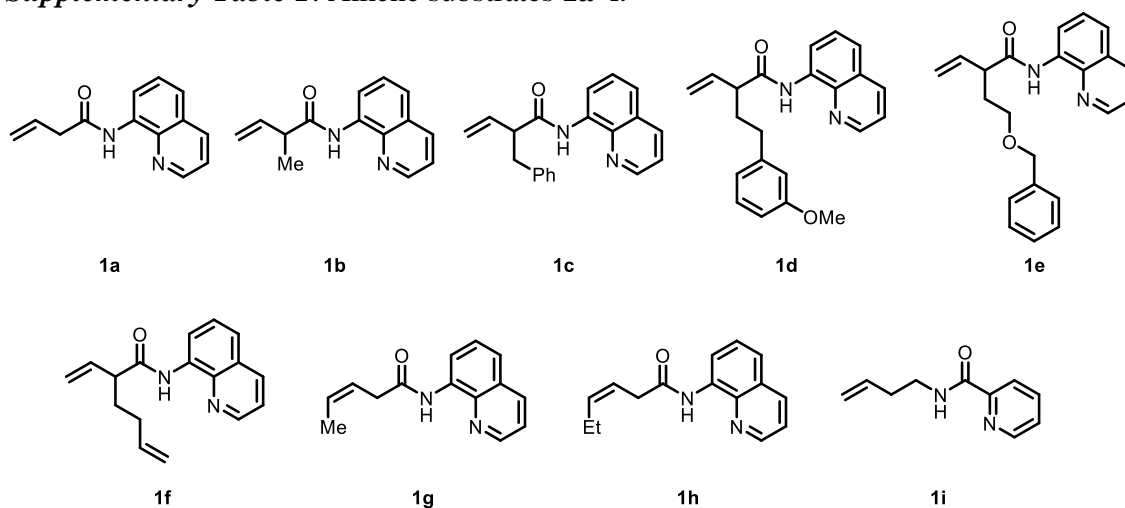

Alkene substrates **1a–i** were prepared according to literature procedures.<sup>1–9</sup>

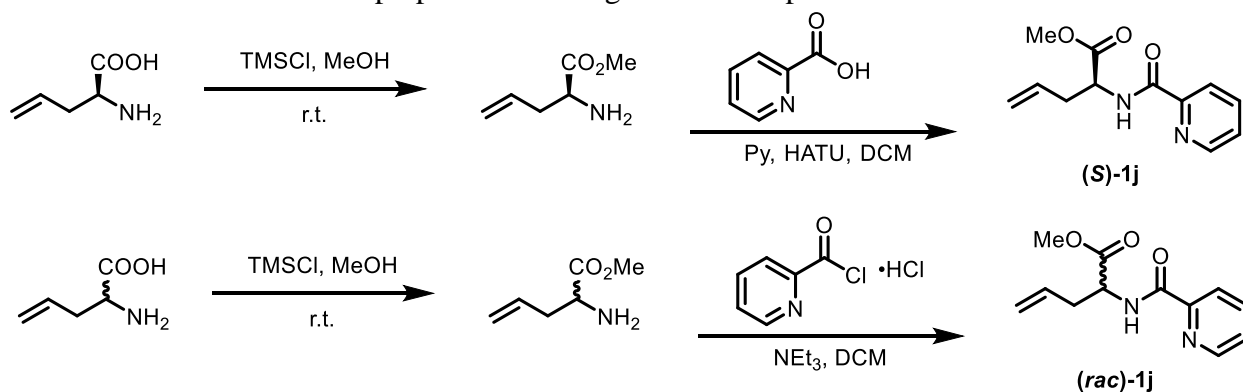

**Supplementary Figure 1:** Synthesis of methyl (*S*)-**1j** and (*rac*)-**1j**.

**Methyl (S)-2-(picolinamido)pent-4-enoate ((S)-1j):** Commercially available (S)-2-Aminopent-4-enoic acid (1.0 g, 8.69 mmol) was charged into a 25-mL round-bottom flask equipped with a Teflon-coated magnetic stir bar to which MeOH (10 mL, 0.87 M) was added. The solution was cooled to 0 °C, and TMSCl (3 mL, 23.64 mmol, 2.7 equiv) was added dropwise. The reaction was allowed to warm to room temperature and stir for 24 h, the reaction mixture was concentrated using a rotary evaporator. The crude product was carried forward to the next step without further purification. The crude product was charged into a 50-mL round-bottom flask containing DCM (15 mL, 0.58 M). Picolinic acid (615 mg, 5 mmol, 0.58 equiv), pyridine (0.9 mL, 12 mmol, 1.38 equiv), and HATU (2.5 g, 6.5 mmol, 0.75 equiv) were added sequentially, and the reaction mixture was stirred at room temperature for 16 h. The deep-brown solution was diluted with EtOAc (100 mL), washed with sat. NaHCO<sub>3</sub> (50 mL, ×2) and brine (50 mL, ×1), concentrated under reduced pressure, and purified by silica gel column chromatography (hexane:EtOAc = 10:1) to afford 9.2 g (79% yield from picolinic acid) of (S)-1j as a colorless oil. The purified sample was diluted with MeCN to approximately 0.1 mg/mL and run on 1D chiral-SFC to determine *ee*. <sup>1</sup>H NMR (600 MHz, CDCl<sub>3</sub>) δ 8.58 (ddd, *J* = 4.8, 1.7, 0.9 Hz, 1H), 8.51 (d, *J* = 8.4 Hz, 1H), 8.17 (dt, *J* = 7.8, 1.1 Hz, 1H), 7.84 (td, *J* = 7.7, 1.7 Hz, 1H), 7.43 (ddd, *J* = 7.6, 4.8, 1.2 Hz, 1H), 5.79 (ddt, *J* = 17.2, 10.1, 7.2 Hz, 1H), 5.26–5.10 (m, 2H), 4.87 (ddd, *J* = 8.3, 6.6, 5.4 Hz, 1H), 3.78 (s, 3H), 2.80–2.68 (m, 1H), 2.70–2.58 (m, 1H). <sup>13</sup>C NMR (150 MHz, CDCl<sub>3</sub>) δ 172.10, 164.20, 149.50, 148.44, 137.42, 132.42, 126.52, 122.44, 119.37, 52.55, 52.01, 36.82. HRMS (ESI-TOF) Calcd for C<sub>12</sub>H<sub>15</sub>N<sub>2</sub>O<sub>3</sub><sup>+</sup> [M+H]<sup>+</sup> 235.1083, found 235.1085.

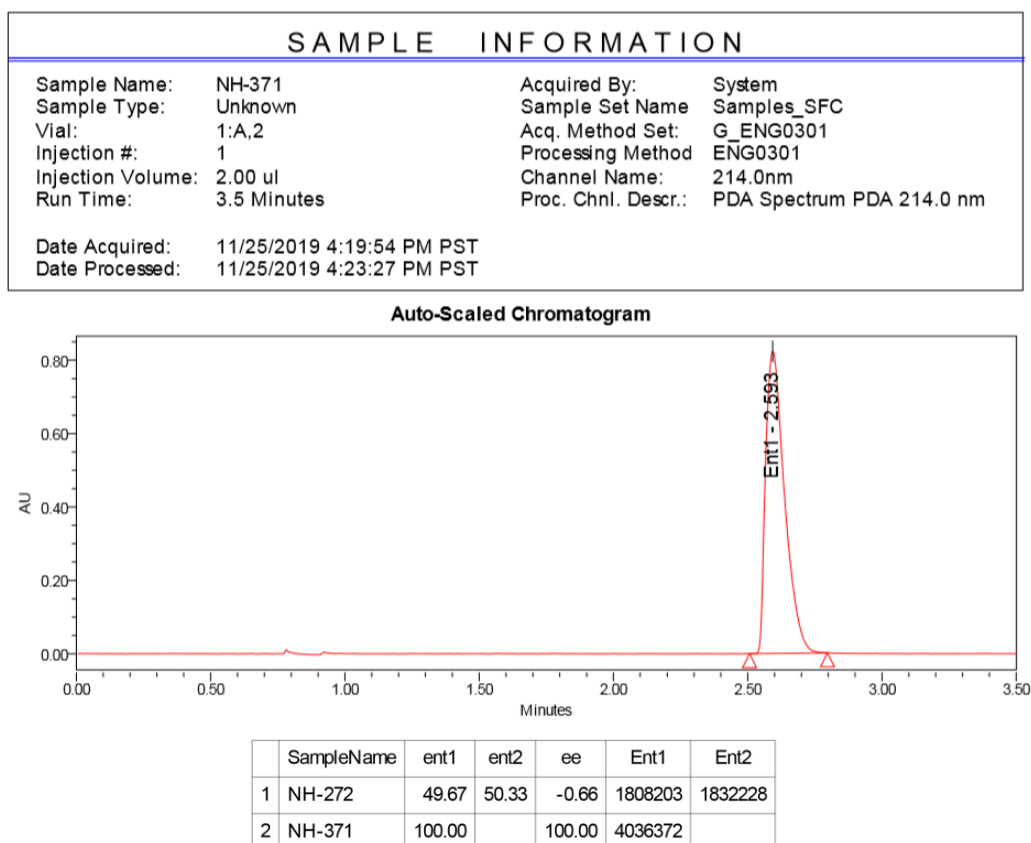

**Supplementary Figure 2:** SFC result for (S)-1j (NH-371).

**Methyl 2-(picolinamido)pent-4-enoate ((rac)-1j):** 2-Aminopent-4-enoic acid (1.0 g, 8.69 mmol) was charged into a 25-mL round-bottom flask equipped with a Teflon-coated magnetic stir bar to which MeOH (10 mL, 0.87 M) was added. The solution was cooled to 0 °C, and then TMSCl (3

mL, 23.64 mmol, 2.7 equiv) was added dropwise. The reaction was allowed to warm to room temperature and stir for 24 h, the reaction mixture was concentrated using a rotary evaporator. The crude product was carried forward to the next step without further purification. The crude product was charged into a 50-mL round-bottom flask containing DCM (25 mL, 0.58 M), and picolinoyl chloride hydrochloride (1.1g, 6 mmol, 0.69 equiv) were added sequentially. The solution was cooled to 0 °C, and then Et<sub>3</sub>N (2.2 mL, 11 mmol, 1.27 equiv) was added dropwise. The reaction mixture was stirred at room temperature for 16 h. The solution was quenched with water (100 mL) and extracted with DCM (100 mL ×2). The combined organic layers were washed with brine (10 mL, ×1), concentrated under reduced pressure, and purified by silica gel column chromatography (hexane:EtOAc = 10:1) to afford 8.1 g (58% yield from picolinoyl chloride hydrochloride) of (*rac*)-**1j**, as a colorless oil. The purified sample was diluted with MeCN to approximately 0.1 mg/mL and run on 1D chiral-SFC to determine *ee*. <sup>1</sup>H NMR (600 MHz, CDCl<sub>3</sub>) δ 8.57 (ddd, *J* = 4.8, 1.7, 0.9 Hz, 1H), 8.50 (d, *J* = 8.2 Hz, 1H), 8.16 (dt, *J* = 7.8, 1.1 Hz, 1H), 7.83 (td, *J* = 7.7, 1.7 Hz, 1H), 7.43 (ddd, *J* = 7.6, 4.8, 1.2 Hz, 1H), 5.78 (ddt, *J* = 17.2, 10.1, 7.2 Hz, 1H), 5.21–5.14 (m, 2H), 4.87 (ddd, *J* = 8.2, 6.6, 5.4 Hz, 1H), 3.77 (s, 3H), 2.72 (dddt, *J* = 13.9, 6.9, 5.4, 1.2 Hz, 1H), 2.64 (dt, *J* = 14.1, 6.8, 1.2 Hz, 1H). <sup>13</sup>C NMR (150 MHz, CDCl<sub>3</sub>) δ 172.08, 164.18, 149.48, 148.43, 137.40, 132.40, 126.50, 122.41, 119.35, 52.52, 51.99, 36.80. HRMS (ESI-TOF) Calcd for C<sub>12</sub>H<sub>15</sub>N<sub>2</sub>O<sub>3</sub><sup>+</sup> [M+H]<sup>+</sup> 235.1083, found 235.1084.

| SAMPLE INFORMATION |                           |                     |                           |
|--------------------|---------------------------|---------------------|---------------------------|
| Sample Name:       | NH-272                    | Acquired By:        | System                    |
| Sample Type:       | Unknown                   | Sample Set Name     |                           |
| Vial:              | 1:A,1                     | Acq. Method Set:    | B_MeOH_03_SFC             |
| Injection #:       | 6                         | Processing Method   | ENG0301                   |
| Injection Volume:  | 2.00 ul                   | Channel Name:       | 214.0nm                   |
| Run Time:          | 10.0 Minutes              | Proc. Chnl. Descr.: | PDA Spectrum PDA 214.0 nm |
| Date Acquired:     | 11/25/2019 4:12:45 PM PST |                     |                           |
| Date Processed:    | 11/25/2019 4:19:41 PM PST |                     |                           |

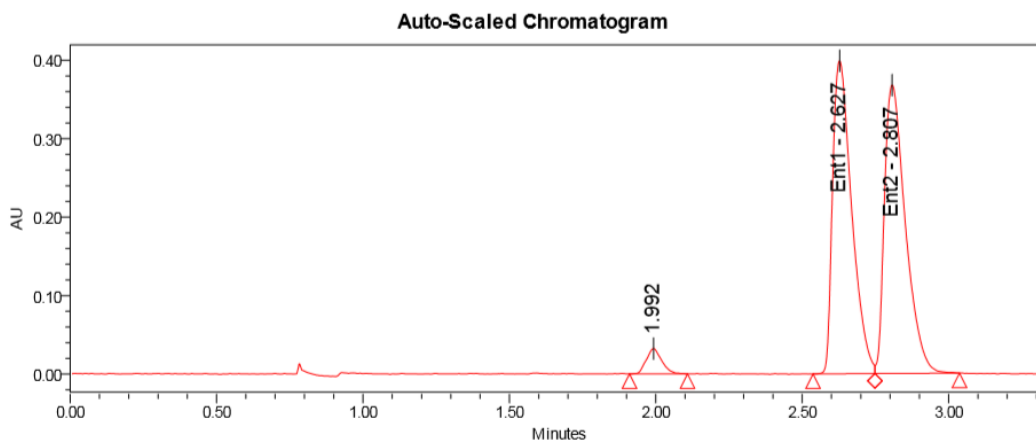

|   | SampleName | ent1   | ent2  | ee     | Ent1    | Ent2    |
|---|------------|--------|-------|--------|---------|---------|
| 1 | NH-272     | 49.67  | 50.33 | -0.66  | 1808203 | 1832228 |
| 2 | NH-371     | 100.00 |       | 100.00 | 4036372 |         |

**Supplementary Figure 3: SFC results for (*rac*)-**1j** (NH-272).**

## Protected *ortho*-Iodoaniline Synthesis

Supplementary Table 2. *ortho*-Iodoanilines **2bv**, **2bt**, **2bx**, and **2by**.

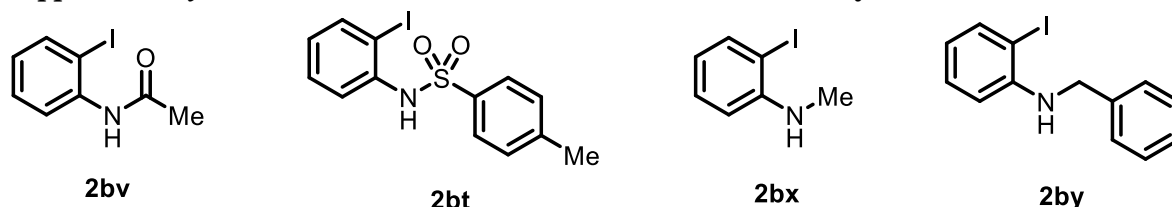

*ortho*-Iodoanilines **2bv**<sup>10</sup>, **2bt**<sup>11</sup>, **2bx**<sup>12</sup>, and **2by**<sup>13</sup> were prepared according to literature procedures.

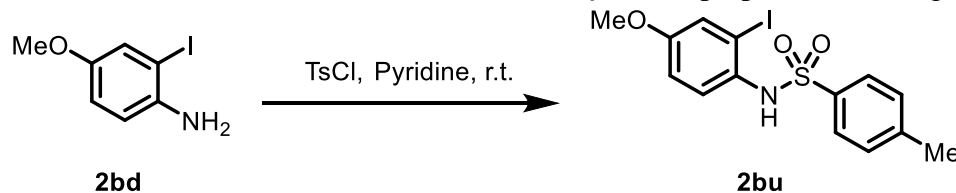

Supplementary Figure 4: Synthesis of *N*-(2-iodo-4-methoxyphenyl)-4-methylbenzenesulfonamide (**2bu**).

***N*-(2-iodo-4-methoxyphenyl)-4-methylbenzenesulfonamide (2bu)**: 2-Iodo-4-methoxyaniline (0.57 g, 2.3 mmol) and TsCl (0.46 g, 2.4 mmol, 1.05 equiv) were charged into a 25-mL round-bottom flask containing pyridine (5 mL) that was equipped with a Teflon-coated magnetic stir bar. The reaction mixture was stirred at room temperature for 1.5 h. The solution was quenched with water (50 mL) and extracted DCM (50 mL,  $\times 3$ ). The combined organic layers were dried over NaSO<sub>4</sub>, filtered, and concentrated under reduced pressure, and purified by silica gel column chromatography (hexane:EtOAc = 3:1) to afford **2bu** (0.2 g, 22% yield) as a brown solid. <sup>1</sup>H NMR (600 MHz, CDCl<sub>3</sub>)  $\delta$  7.60 – 7.53 (m, 3H), 7.23 – 7.18 (m, 2H), 7.16 (d,  $J$  = 2.8 Hz, 1H), 6.89 (dd,  $J$  = 8.9, 2.8 Hz, 1H), 6.46 (s, 1H), 3.75 (s, 3H), 2.39 (s, 3H). <sup>13</sup>C NMR (150 MHz, CDCl<sub>3</sub>)  $\delta$  157.96, 144.17, 136.09, 130.75, 129.70, 127.70, 125.50, 124.07, 115.28, 94.69, 55.80, 21.75. HRMS (ESI-TOF) Calcd for C<sub>14</sub>H<sub>15</sub>INO<sub>3</sub>S<sup>+</sup> [M+H]<sup>+</sup> radical cation 402.9739, found 402.9725.

## C-Nucleophile Synthesis

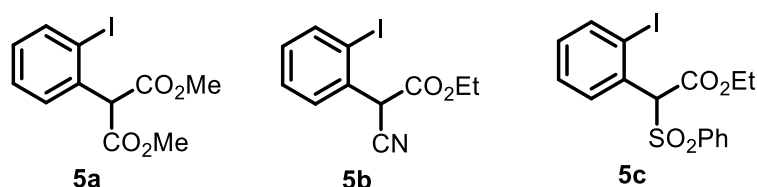

C-Nucleophile **5a-c** were prepared according to literature procedures.<sup>14, 24</sup>

## Reaction Optimization Details

**Supplementary Table 3.** Base optimization for *ortho*-iodophenol substrates.

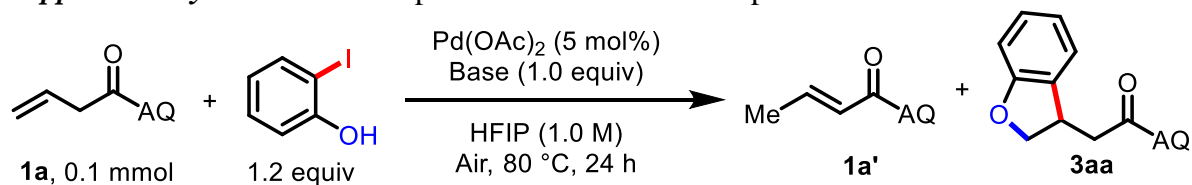

| Entry | Base                            | <b>1a</b> <sup>a</sup> | <b>3aa</b> <sup>a</sup> |
|-------|---------------------------------|------------------------|-------------------------|
| 1     | K <sub>2</sub> CO <sub>3</sub>  | n.d.                   | 95% (96% <sup>b</sup> ) |
| 2     | KHCO <sub>3</sub>               | n.d.                   | 74%                     |
| 3     | Na <sub>2</sub> CO <sub>3</sub> | n.d.                   | 64%                     |
| 4     | KF                              | 55%                    | 35%                     |
| 5     | K <sub>3</sub> PO <sub>4</sub>  | n.d.                   | 95%                     |
| 6     | KOH                             | 12%                    | 72%                     |
| 7     | KO <sup>t</sup> Bu              | n.d.                   | 87%                     |
| 8     | KOAc                            | 55%                    | 22%                     |
| 9     | NEt <sub>3</sub>                | n.d. (54% <b>1a'</b> ) | 33%                     |

<sup>a</sup> Yield determined by <sup>1</sup>H NMR analysis of the crude reaction mixture using CH<sub>2</sub>Br<sub>2</sub> as an internal standard. <sup>b</sup> Isolated yield.

**Supplementary Table 4.** Solvent optimization for *ortho*-iodophenol substrates.

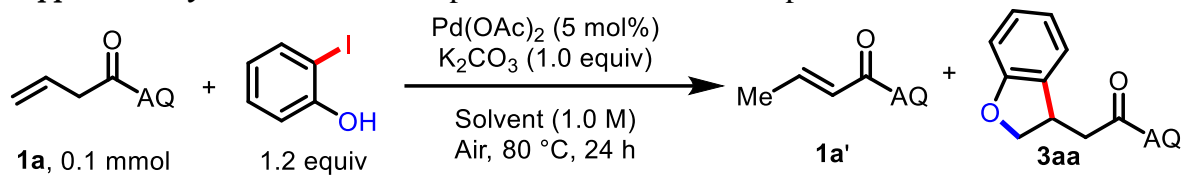

| Entry | Solvent     | <b>1a'</b> <sup>a</sup> | <b>3aa</b> <sup>a</sup> |
|-------|-------------|-------------------------|-------------------------|
| 1     | HFIP        | n.d.                    | 95% (96% <sup>b</sup> ) |
| 2     | MeCN        | 83%                     | 9%                      |
| 3     | t-AmylOH    | 60%                     | 22%                     |
| 1     | iPrOH       | 90%                     | 9%                      |
| 2     | toluene     | 24%                     | 71%                     |
| 3     | DMF         | 37%                     | trace                   |
| 1     | DCM         | 45%                     | 50%                     |
| 2     | 1,4-dioxane | 76%                     | 17%                     |
| 3     | THF         | 80%                     | 4%                      |

<sup>a</sup> Yield determined by <sup>1</sup>H NMR analysis of the crude reaction mixture using CH<sub>2</sub>Br<sub>2</sub> as an internal standard. <sup>b</sup> Isolated yield.

**Supplementary Table 5.** Concentration Screening for *ortho*-iodophenol substrates.

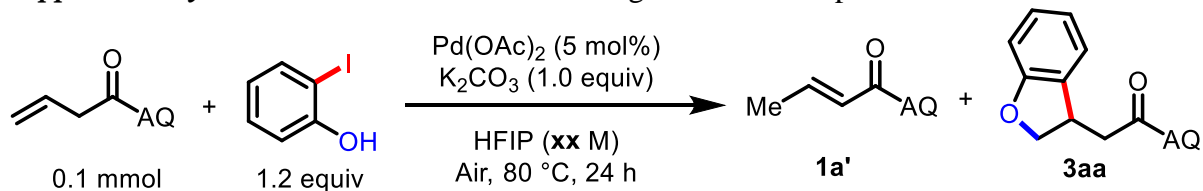

| Entry | Concentration | <b>1a'</b> <sup>a</sup> | <b>3aa</b> <sup>a</sup> |
|-------|---------------|-------------------------|-------------------------|
| 1     | HFIP (0.5 M)  | n.d.                    | 70%                     |
| 2     | HFIP (1.0 M)  | n.d.                    | 95% (96% <sup>b</sup> ) |
| 3     | Neat          | 54%                     | 31%                     |

<sup>a</sup> Yield determined by <sup>1</sup>H NMR analysis of the crude reaction mixture using CH<sub>2</sub>Br<sub>2</sub> as an internal standard. <sup>b</sup> Isolated yield.

**Supplementary Table 6.** Concentration Screening for *ortho*-iodoaniline substrates.

| Entry | R               | Concentration | Yield <sup>a</sup>      |
|-------|-----------------|---------------|-------------------------|
| 1     | H               | HFIP (0.5 M)  | 76% (75% <sup>b</sup> ) |
| 2     | H               | HFIP (1.0 M)  | 69%                     |
| 3     | Me <sup>c</sup> | HFIP (0.5 M)  | 10%                     |
| 4     | Me <sup>c</sup> | HFIP (2.0 M)  | 47% (50% <sup>b</sup> ) |
| 5     | Bn <sup>c</sup> | HFIP (0.5 M)  | 10%                     |
| 6     | Bn <sup>c</sup> | HFIP (1.0 M)  | 33%                     |
| 7     | Bn <sup>c</sup> | HFIP (2.0 M)  | 55% (58% <sup>b</sup> ) |

<sup>a</sup> Yield determined by <sup>1</sup>H NMR analysis of the crude reaction mixture using CH<sub>2</sub>Br<sub>2</sub> as an internal standard. <sup>b</sup> Isolated yield. <sup>c</sup> Pd(OAc)<sub>2</sub> (10 mol%)

**Supplementary Table 7.** Temperature Screening for 2,3-dihydroindene synthesis.

| Entry | Temperature | Yield <sup>a</sup>      |
|-------|-------------|-------------------------|
| 1     | 40 °C       | 90% (86% <sup>b</sup> ) |
| 2     | 60 °C       | 79%                     |
| 3     | 80 °C       | 65%                     |

<sup>a</sup> Yield of mixture determined by <sup>1</sup>H NMR analysis of the crude reaction mixture using Cl<sub>2</sub>CHCHCl<sub>2</sub> as an internal standard. <sup>b</sup> Isolated yield.



## Mechanistic Studies

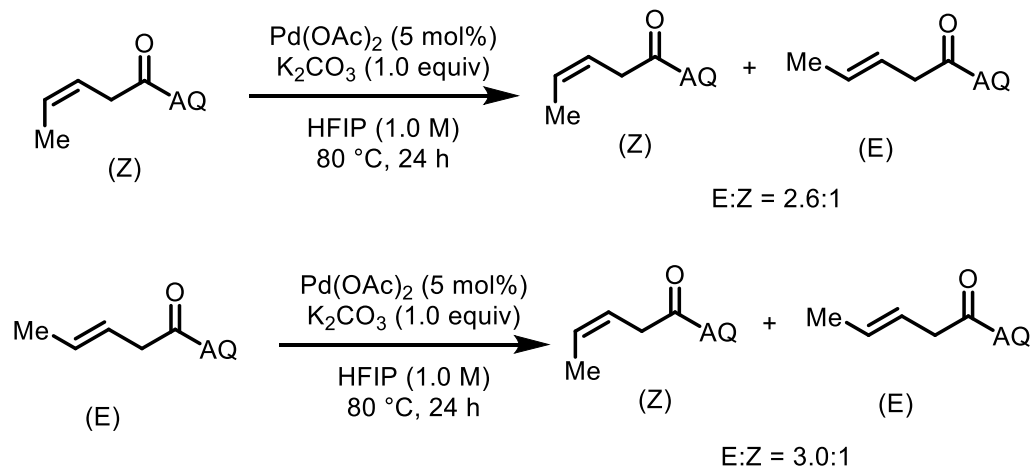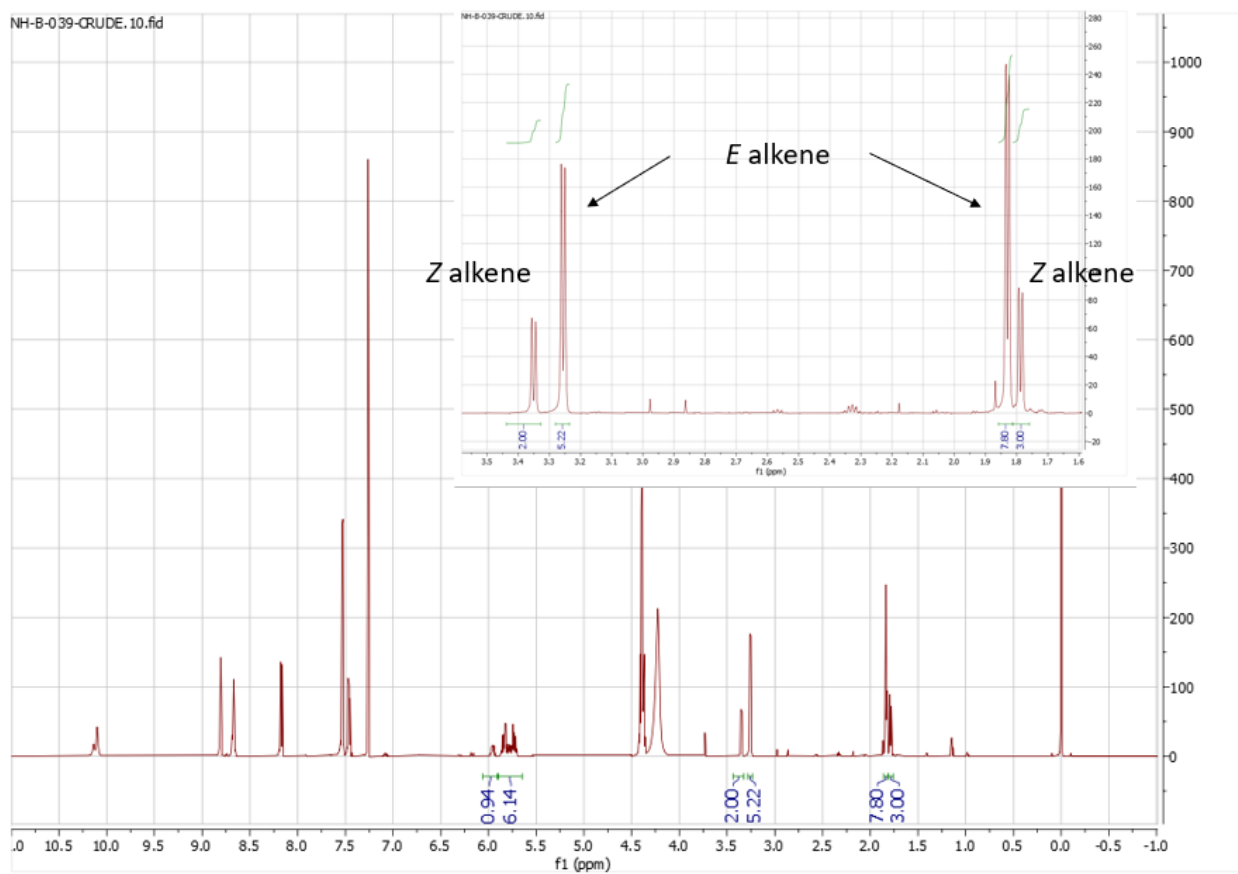

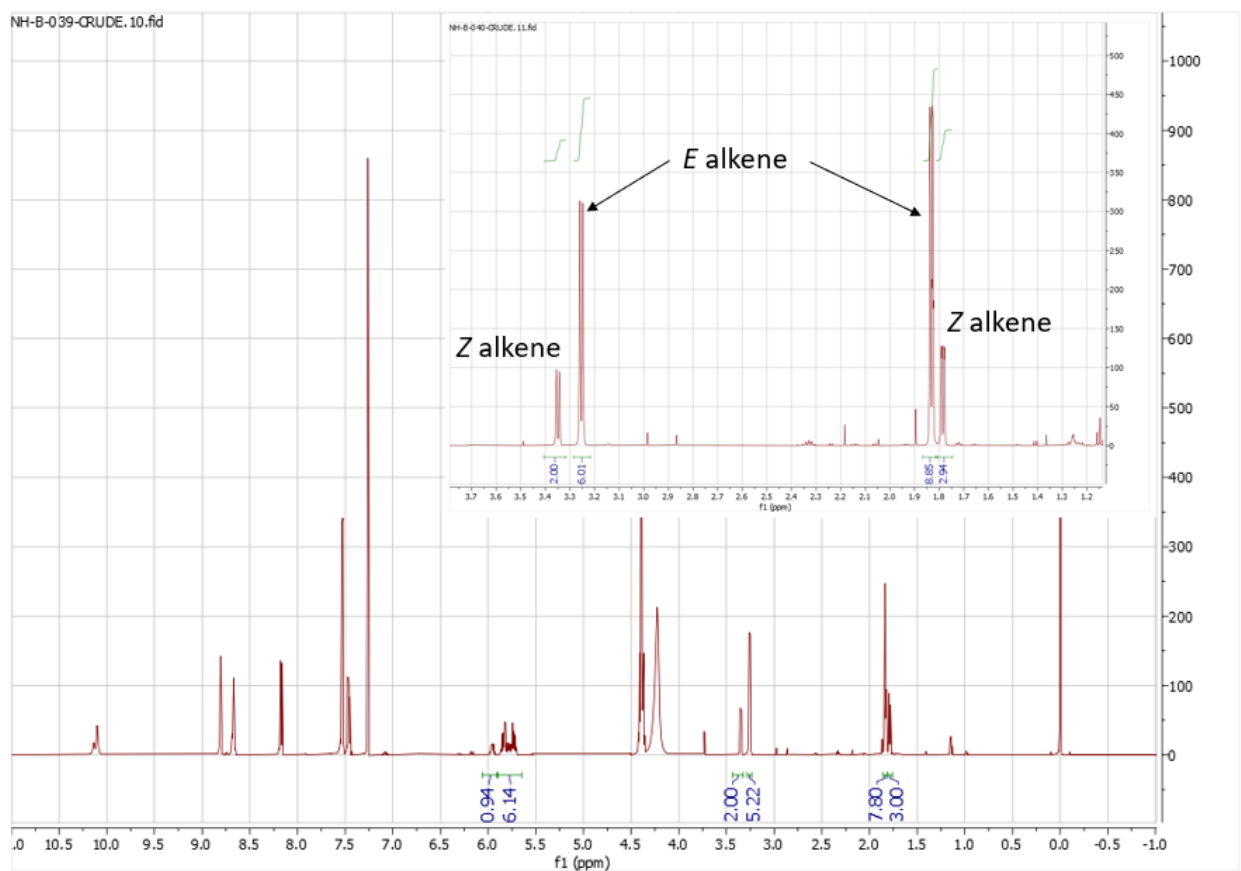

**Supplementary Figure 5:** Investigation of Alkene Substrate E/Z Isomerization.

To a 4-mL scintillation vial equipped with a Teflon-coated magnetic stir bar were added the Pd(OAc)<sub>2</sub> (1.1 mg, 0.005 mmol, 5 mol%), alkene substrate (24 mg, 0.1 mmol), K<sub>2</sub>CO<sub>3</sub> (13.8 mg, 0.1 mmol, 1 equiv), and HFIP (0.1 mL). The vial was sealed with a screw-top septum cap and placed in a heating block that was pre-heated to 80 °C. The reaction was allowed to run for 24 h, and E:Z ratio was determined by <sup>1</sup>H NMR analysis of the crude reaction mixture.

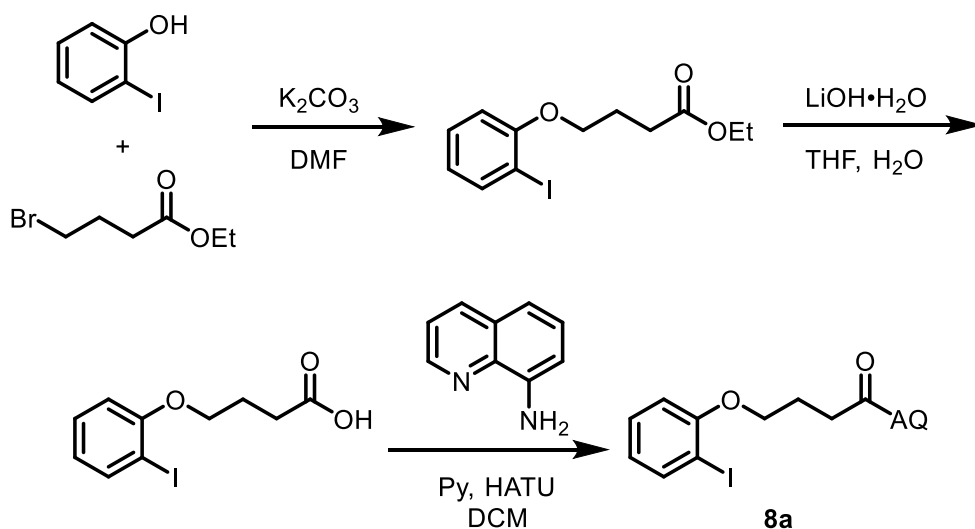

**Supplementary Figure 6:** Synthesis of 4-(2-iodophenoxy)-N-(quinolin-8-yl)butanamide (**8a**)

**4-(2-iodophenoxy)-*N*-(quinolin-8-yl)butanamide (8a):** The title compound was prepared using a procedure adapted from literature.<sup>15</sup> Ethyl 4-bromobutanoate (2.9 g, 15 mmol) and 2-iodophenol (2.2 g, 10 mmol) were charged into a 100-mL round-bottom flask. K<sub>2</sub>CO<sub>3</sub> (6.9 g, 50 mmol, 5 equiv) and DMF (50 mL) were then added. The reaction was stirred at 60 °C for 12 h. The mixture was quenched with water, extracted with EtOAc (100 mL×1). The organic layers were dried over Na<sub>2</sub>SO<sub>4</sub>, filtered, and concentrated under reduced pressure. The crude product was carried forward to the next step without further purification. The crude mixture containing ethyl 4-(2-iodophenoxy)butanoate was charged into a 100-mL round-bottom flask containing THF (10 mL) and water (10 mL). Lithium hydroxide monohydrate (1.26 g, 30 mmol, 3 equiv) was added, and the reaction mixture was stirred at ambient temperature for 16 h. The organic layer was acidified with conc. HCl to pH=1 and extracted with EtOAc (50 mL, ×3). The combined organic layers were dried over Na<sub>2</sub>SO<sub>4</sub> and concentrated under reduced pressure. The crude mixture containing 4-(2-iodophenoxy)butanoic acid was charged into a 100-mL round-bottom flask containing DCM (30 mL). 8-Aminoquinoline (1.44 g, 10 mmol, 1 equiv), pyridine (1.6 mL), and HATU (684 mg, 13 mmol, 1.3 equiv) were added sequentially, and the reaction mixture was stirred at ambient temperature for 16 h. The deep brown solution was diluted with EtOAc (200 mL), washed with sat. NaHCO<sub>3</sub> (200 mL ×1) and brine (200 mL ×1), dried over Na<sub>2</sub>SO<sub>4</sub>, filtered, concentrated under reduced pressure, and purified by column chromatography (hexane:EtOAc = 10:1) to afford **8a** (60% yield over 3 steps from 2-iodophenol) as a light yellow solid. <sup>1</sup>H NMR (600 MHz, CDCl<sub>3</sub>) δ 9.92 (s, 1H), 8.77 (dd, *J* = 7.5, 1.5 Hz, 1H), 8.72 (dd, *J* = 4.2, 1.7 Hz, 1H), 8.14 (dd, *J* = 8.3, 1.7 Hz, 1H), 7.77 (dd, *J* = 7.8, 1.6 Hz, 1H), 7.58–7.46 (m, 2H), 7.43 (dd, *J* = 8.3, 4.2 Hz, 1H), 7.29–7.23 (m, 1H), 6.82 (dd, *J* = 8.3, 1.3 Hz, 1H), 6.70 (td, *J* = 7.6, 1.4 Hz, 1H), 4.17 (t, *J* = 5.9 Hz, 2H), 2.91 (t, *J* = 7.2 Hz, 2H), 2.35 (tt, *J* = 7.2, 5.9 Hz, 2H). <sup>13</sup>C NMR (150 MHz, CDCl<sub>3</sub>) δ 171.21, 157.43, 148.26, 139.49, 138.47, 136.41, 134.65, 129.61, 128.06, 127.50, 122.70, 121.72, 121.59, 116.57, 112.36, 86.96, 67.95, 34.43, 25.19. **HRMS (ESI-TOF)** Calcd for C<sub>19</sub>H<sub>18</sub>IN<sub>2</sub>O<sub>2</sub><sup>+</sup> [M+H]<sup>+</sup> 433.0413, found 433.0407.

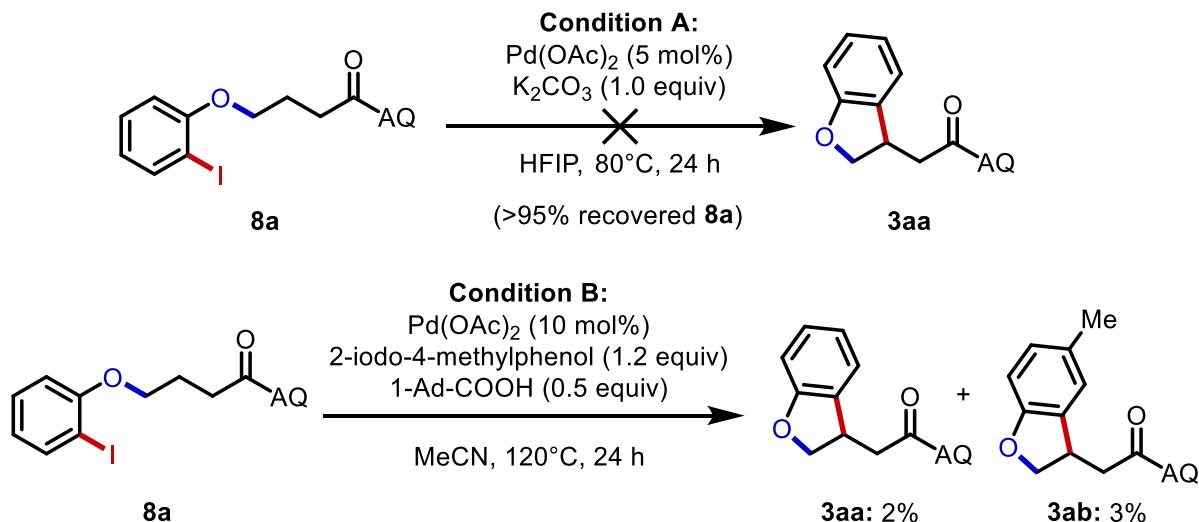

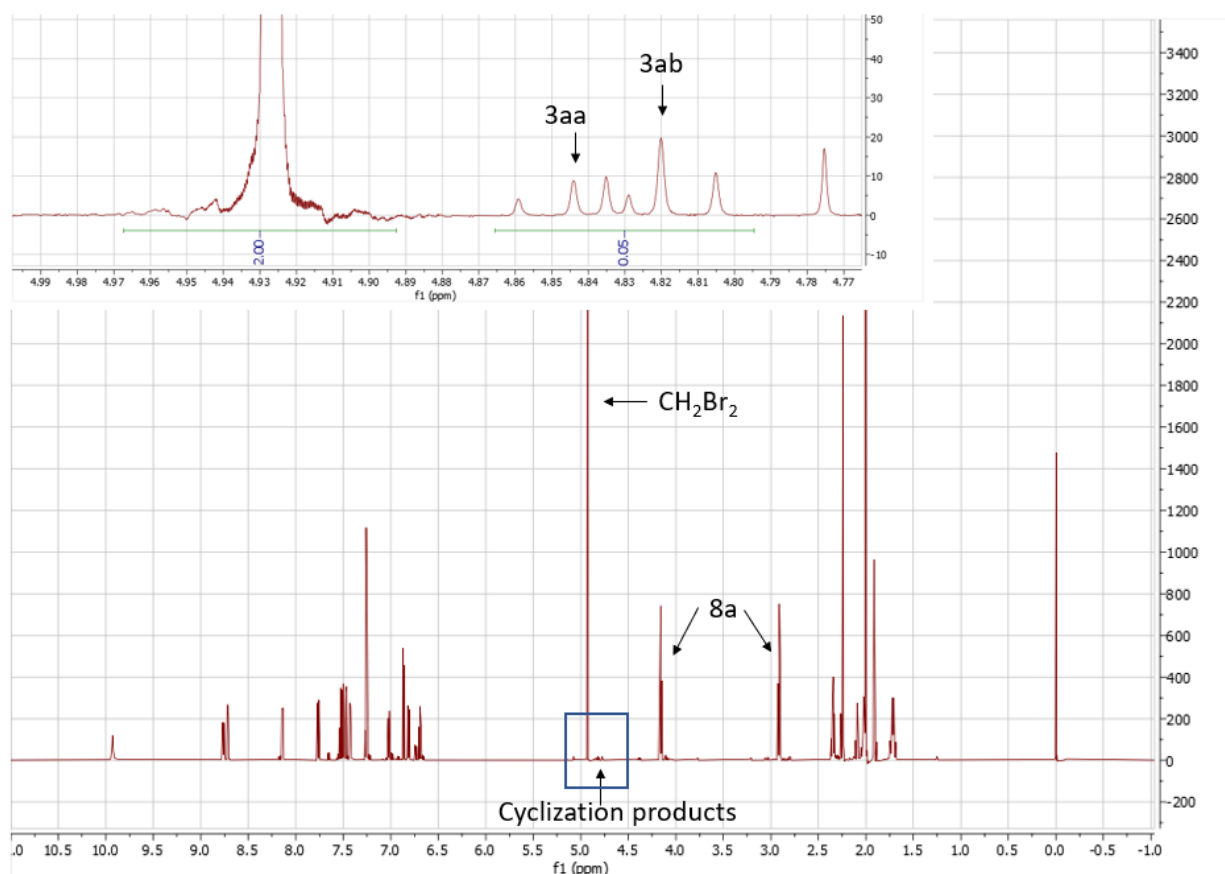

**Supplementary Figure 7:** Mechanistic Experiment A

**Conditions A:** **8a** (43.3 mg, 0.1 mmol), Pd(OAc)<sub>2</sub> (1.1 mg, 0.005 mmol, 5 mol%), K<sub>2</sub>CO<sub>3</sub> (13.8 mg, 0.1 mmol, 1.0 equiv), and HFIP (0.1 mL) were added into a 4-mL scintillation vial equipped with a Teflon-coated magnetic stir bar. The vial was capped and placed in a heating block that was pre-heated to 80 °C. The reaction was allowed to run for 24 h, and yields were determined by <sup>1</sup>H NMR analysis of the crude reaction mixture using CH<sub>2</sub>Br<sub>2</sub> as internal standard.

**Conditions B:** **8a** (43.3 mg, 0.1 mmol), Pd(OAc)<sub>2</sub> (2.2 mg, 0.010 mmol, 10 mol%), 2-iodo-4-methylphenol (28.1 mg, 0.12 mmol, 1.2 equiv), 1-Ad-COOH (9.0 mg, 0.05 mmol, 0.5 equiv), and MeCN (0.1 mL) were added into a 4-mL scintillation vial equipped with a Teflon-coated magnetic stir bar. The vial was capped and placed in a heating block that was pre-heated to 120 °C. The reaction was allowed to run for 24 h, and yields were determined by <sup>1</sup>H NMR analysis of the crude reaction mixture using CH<sub>2</sub>Br<sub>2</sub> as internal standard.

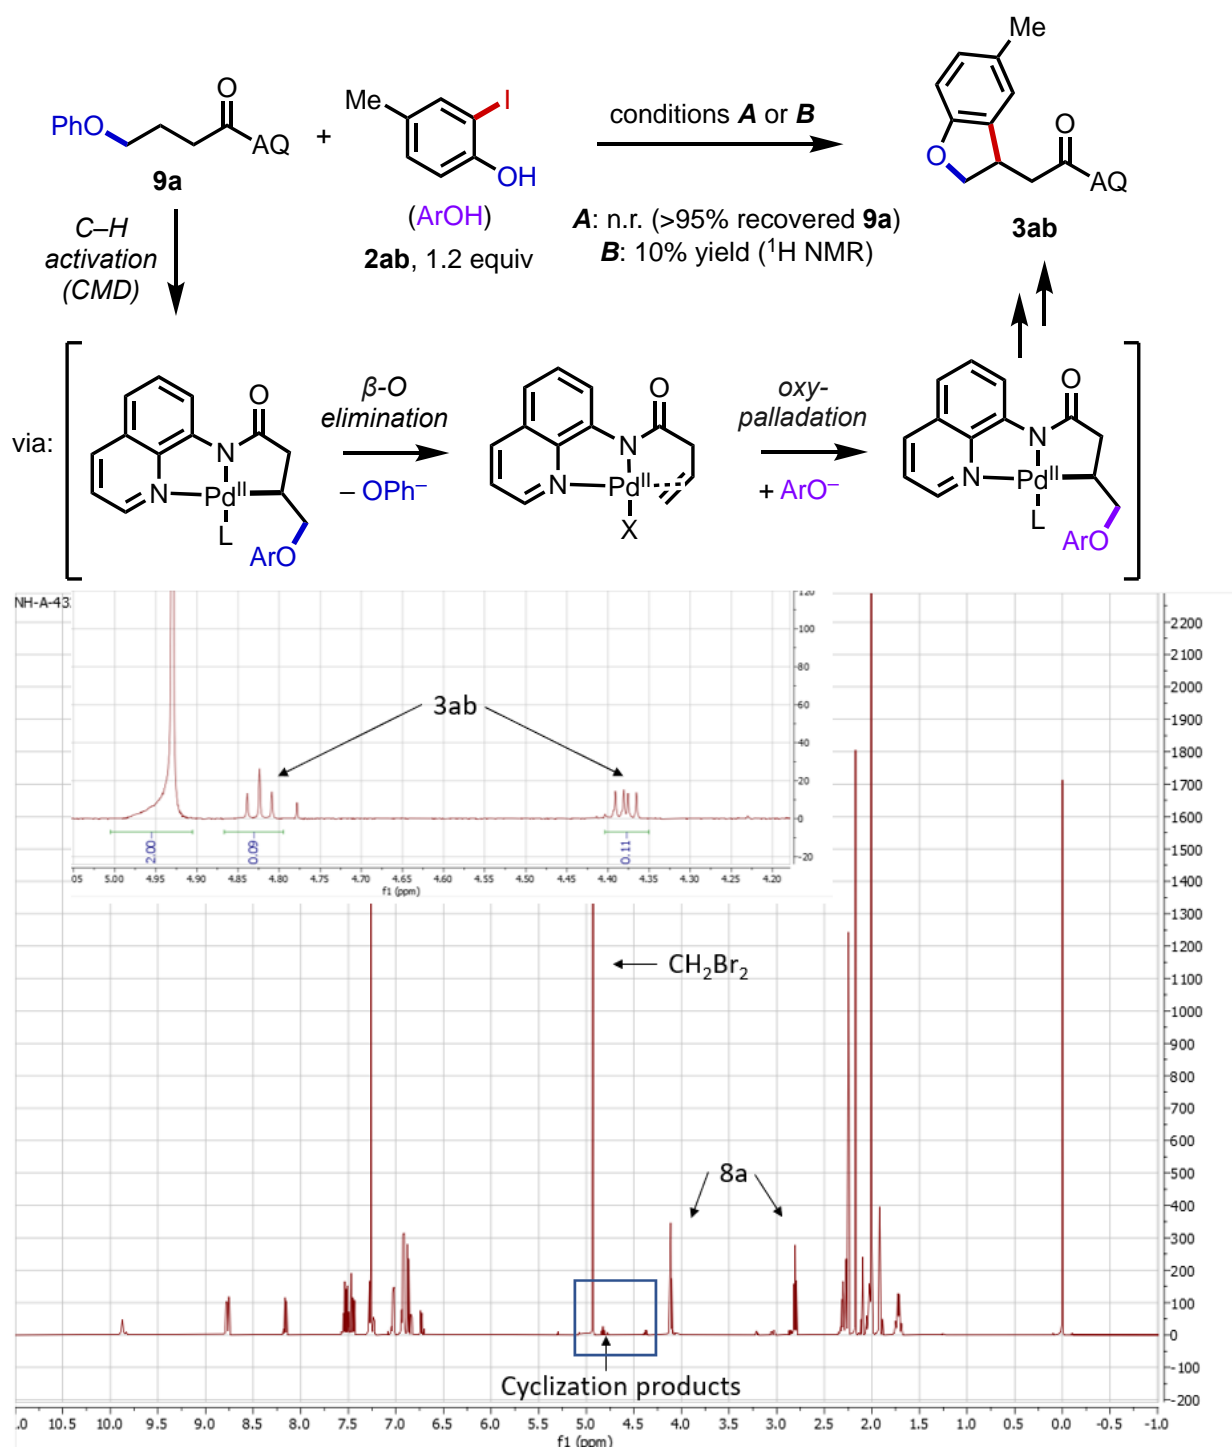

**Supplementary Figure 8: Mechanistic Experiment B**

Compound **9a** (30.6 mg, 0.1 mmol), Pd(OAc)<sub>2</sub> (4.5 mg, 20 mol% or 1.1 mg, 5 mol%, respectively), the appropriate iodophenol substrate (0.12 mmol), either 1-Ad-COOH (9 mg, 0.05 mmol, 0.5 equiv) or K<sub>2</sub>CO<sub>3</sub> (13.8 mg, 0.1 mmol, 1.0 equiv), and solvent were added into a 4-mL scintillation vial equipped with a Teflon-coated magnetic stir bar. The vial was capped and placed in a heating block that was pre-heated to the appropriate temperature (120 °C or 80 °C, respectively). The reaction was allowed to run at elevated temperature for 24 h, and yields were determined by <sup>1</sup>H NMR analysis of the crude reaction mixture using CH<sub>2</sub>Br<sub>2</sub> as internal standard.

## Competition Study

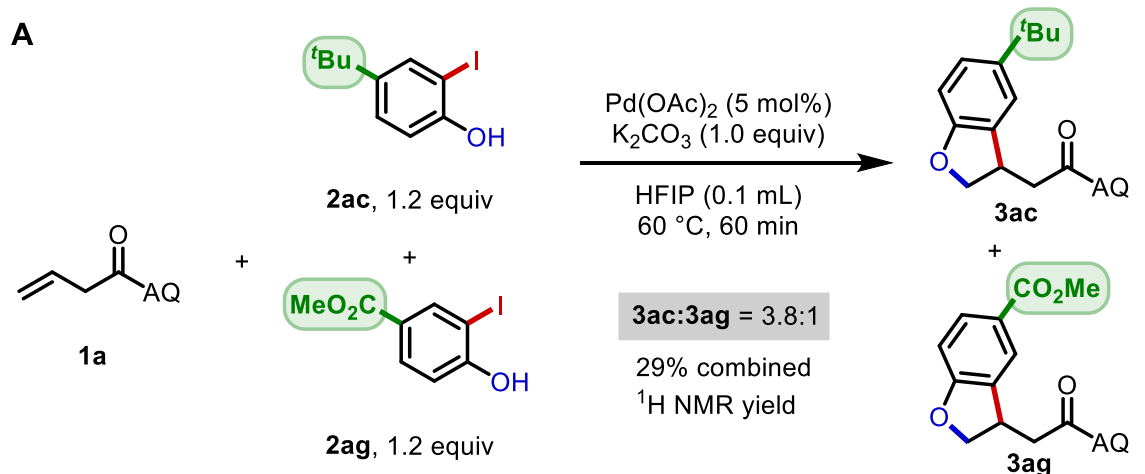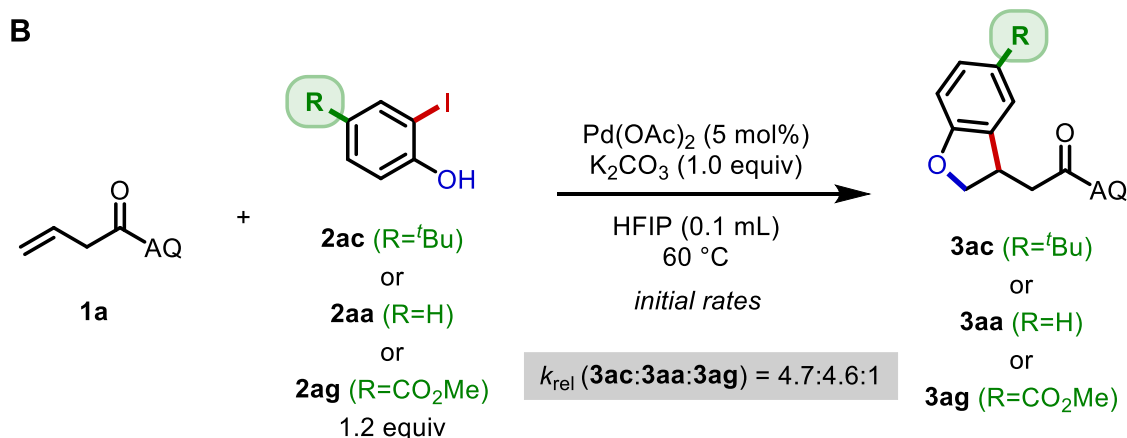

**Supplementary Figure 9:** (A) One-pot competition experiment; (B) Comparison of initial rates.

**Study A:** To a 4-mL scintillation vial equipped with a Teflon-coated magnetic stir bar were added the  $\text{Pd(OAc)}_2$  (1.1 mg, 0.005 mmol, 5 mol%), alkene substrate (21.2 mg, 0.1 mmol), the appropriate *ortho*-iodophenol substrates (0.12 mmol),  $\text{K}_2\text{CO}_3$  (13.8 mg, 0.1 mmol, 1 equiv), and HFIP (0.1 mL). The vial was sealed with a screw-top septum cap and placed in a heating block that was pre-heated to 60 °C. The reaction was allowed to run for 60 min, and yields were determined by  $^1\text{H}$  NMR analysis of the crude reaction mixture using  $\text{Cl}_2\text{CHCHCl}_2$  as internal standard.

**Study B:** To a 4-mL scintillation vial equipped with a Teflon-coated magnetic stir bar were added the  $\text{Pd(OAc)}_2$  (1.1 mg, 0.005 mmol, 5 mol%), alkene substrate (21.2 mg, 0.1 mmol), the appropriate *ortho*-iodophenol substrate (0.12 mmol),  $\text{K}_2\text{CO}_3$  (13.8 mg, 0.1 mmol, 1 equiv), and HFIP (0.1 mL). The vial was sealed with a screw-top septum cap and placed in a heating block that was pre-heated to 60 °C. The reaction was allowed to run for 30-120 min, and yields were determined by  $^1\text{H}$  NMR analysis of the crude reaction mixture using  $\text{Cl}_2\text{CHCHCl}_2$  as internal standard. (Multiple parallel reactions stopped at pre-determined time points.)

**Supplementary Table 8:** Initial rates for phenols **2aa**, **2ag**, and **2ac**

|            | 30 min | 60 min | 90 min | 120 min |
|------------|--------|--------|--------|---------|
| <b>2aa</b> | 14%    | 29%    | 40%    | 49%     |
| <b>2ag</b> | 3%     | 7%     | 8%     | 8%      |
| <b>2ac</b> | 18%    | 32%    | 45%    | 53%     |

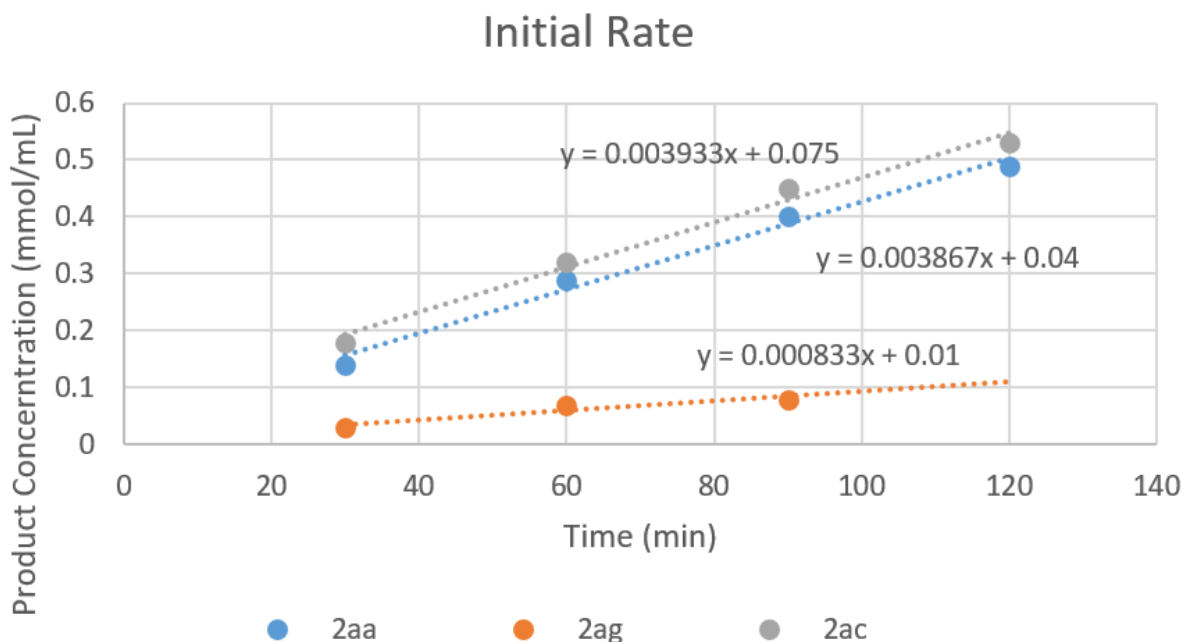

**Supplementary Figure 10:** Initial rates for **2aa**, **2ag**, and **2ac**.

### General Procedure A for [3+2] 2,3-Dihydrobenzofuran Synthesis

To a 4-mL scintillation vial equipped with a Teflon-coated magnetic stir bar were added the Pd(OAc)<sub>2</sub> (1.1 mg, 0.005 mmol, 5 mol%), alkene substrate (21.2 mg, 0.1 mmol), the appropriate *ortho*-iodophenol (0.12 mmol, 1.2 equiv), K<sub>2</sub>CO<sub>3</sub> (13.8 mg, 0.1 mmol, 1 equiv), and HFIP (0.1 mL). The vial was sealed with a screw-top septum cap and placed in a heating block that was pre-heated to 80 °C. The reaction was allowed to run for 24 h and then was cooled to room temperature. The reaction mixture was filtered through a short plug of Celite, which was washed with EtOAc. The filtrate was concentrated under reduced pressure to afford a brown residue, which, upon purification by preparative TLC, afforded the pure product.

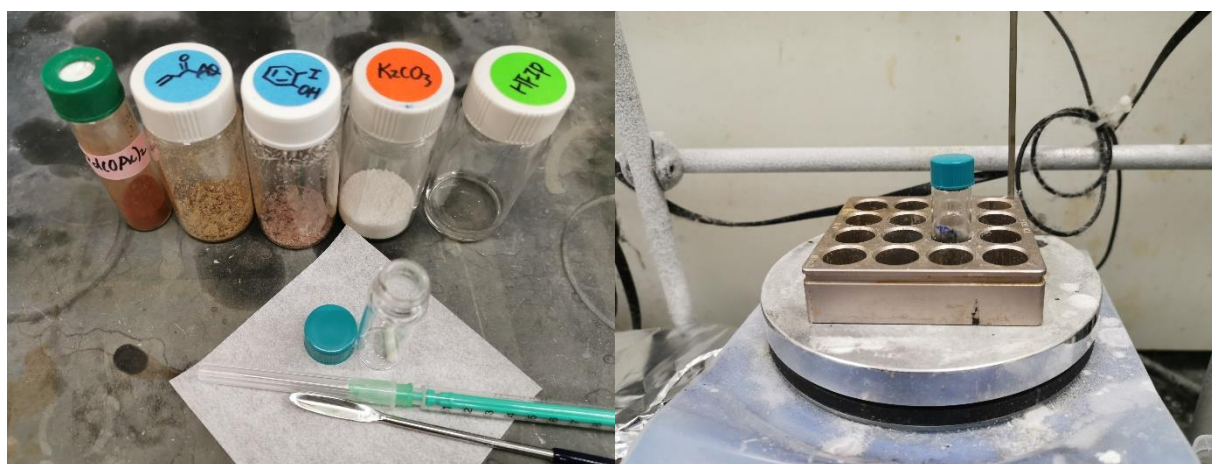

**Supplementary Figure 11:** Photographic depiction of the reaction procedure.

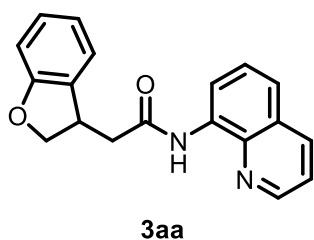

**2-(2,3-dihydrobenzofuran-3-yl)-N-(quinolin-8-yl)acetamide (3aa):**

The title compound was prepared from **1a** (21.2 mg, 0.1 mmol) and 2-iodophenol (26.4 mg, 0.12 mmol) according to General Procedure A. Purification using preparative TLC with 3:1 hexanes:EtOAc as the eluent gave the product as a white solid (29.2 mg, 96% yield). <sup>1</sup>H NMR (600 MHz, CDCl<sub>3</sub>) δ 9.84 (s, 1H), 8.81–8.75 (m, 2H), 8.17 (dd, *J* = 8.2, 1.7 Hz, 1H), 7.58–7.54 (m, 1H), 7.53 (dd, *J* = 8.3, 1.6 Hz, 1H), 7.46 (dd, *J* = 8.2, 4.2 Hz, 1H), 7.26–7.23 (m, 1H), 7.17–7.12 (m, 1H), 6.86 (td, *J* = 7.4, 1.0 Hz, 1H), 6.83 (dd, *J* = 8.0, 0.9 Hz, 1H), 4.85 (t, *J* = 9.1 Hz, 1H), 4.40 (dd, *J* = 9.2, 6.1 Hz, 1H), 4.12 (tt, *J* = 9.1, 5.8 Hz, 1H), 3.05 (dd, *J* = 15.5, 5.6 Hz, 1H), 2.87 (dd, *J* = 15.5, 9.3 Hz, 1H). <sup>13</sup>C NMR (150 MHz, CDCl<sub>3</sub>) δ 169.59, 160.02, 148.37, 138.41, 136.54, 134.34, 129.61, 128.77, 128.10, 127.52, 124.55, 121.90, 121.85, 120.76, 116.68, 109.88, 77.00, 43.23, 38.78. **HRMS (ESI-TOF)** Calcd for C<sub>19</sub>H<sub>17</sub>N<sub>2</sub>O<sub>2</sub><sup>+</sup> [M+H]<sup>+</sup> 305.1290, found 305.1287. **X-ray** (single-crystal) Colorless needle crystals of X-ray diffraction quality were obtained by vapor diffusion of hexane into a saturated solution of **3aa** in toluene (CCDC 2031197).<sup>16</sup>

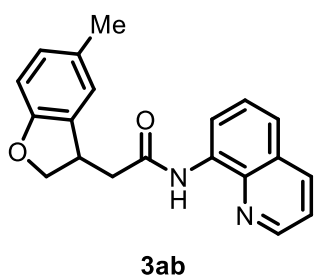

**2-(5-methyl-2,3-dihydrobenzofuran-3-yl)-N-(quinolin-8-yl)acetamide (3ab):**

The title compound was prepared from **1a** (21.2 mg, 0.1 mmol) and 2-iodo-4-methylphenol (28.1 mg, 0.12 mmol) according to the General Procedure A. Purification using preparative TLC with 3:1 hexanes:EtOAc as the eluent gave the product as a white solid (27.0 mg, 85% yield). <sup>1</sup>H NMR (600 MHz, CDCl<sub>3</sub>) δ 9.83 (s, 1H), 8.81–8.74 (m, 2H), 8.17 (dd, *J* = 8.3, 1.7 Hz, 1H), 7.58–7.55 (m, 1H), 7.53 (dd, *J* = 8.3, 1.6 Hz, 1H), 7.46 (dd, *J* = 8.2, 4.2 Hz, 1H), 7.07–7.03 (m, 1H), 6.97–6.92 (m, 1H), 6.72 (d, *J* = 8.1 Hz, 1H), 4.83 (t, *J* = 9.0 Hz, 1H), 4.38 (dd, *J* = 9.2, 6.1 Hz, 1H), 4.06 (tt, *J* = 9.1, 5.7 Hz, 1H), 3.05 (dd, *J* = 15.4, 5.4 Hz, 1H), 2.85 (dd, *J* = 15.4, 9.3 Hz, 1H), 2.25 (s, 3H). <sup>13</sup>C NMR (150 MHz, CDCl<sub>3</sub>) δ 169.67, 157.90, 148.35, 138.41, 136.53, 134.35, 130.04, 129.60, 129.12, 128.09, 127.52, 125.07, 121.87, 121.83, 116.67, 109.38, 77.11, 43.20, 38.88, 20.92. **HRMS (ESI-TOF)** Calcd for C<sub>20</sub>H<sub>19</sub>N<sub>2</sub>O<sub>2</sub><sup>+</sup> [M+H]<sup>+</sup> 319.1447, found 319.1448.



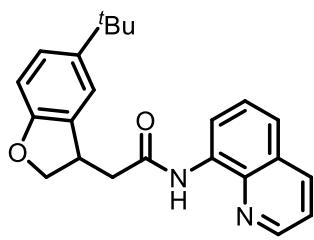

**3ac**

**2-(5-(tert-butyl)-2,3-dihydrobenzofuran-3-yl)-N-(quinolin-8-yl)acetamide (3ac):** The title compound was prepared from **1a** (21.2 mg, 0.1 mmol) and 4-(tert-butyl)-2-iodophenol (33.1 mg, 0.12 mmol) according to the General Procedure A. Purification using preparative TLC with 3:1 hexanes:EtOAc as the eluent gave the product as a white solid (35.6 mg, 99% yield).  $^1\text{H NMR}$  (600 MHz,  $\text{CDCl}_3$ )  $\delta$  9.84 (s, 1H), 8.80 (dd,  $J = 7.4, 1.5$  Hz, 1H), 8.77 (dd,  $J = 4.2, 1.7$  Hz, 1H), 8.17 (dd,  $J = 8.3, 1.7$  Hz, 1H), 7.59–7.51 (m, 2H), 7.45 (dd,  $J = 8.3, 4.2$  Hz, 1H), 7.27–7.25 (m, 1H), 7.17 (ddd,  $J = 8.4, 2.2, 0.7$  Hz, 1H), 6.76 (d,  $J = 8.4$  Hz, 1H), 4.85 (t,  $J = 9.0$  Hz, 1H), 4.43–4.37 (m, 1H), 4.12–4.04 (m, 1H), 3.06 (dd,  $J = 15.3, 5.5$  Hz, 1H), 2.87 (dd,  $J = 15.3, 9.4$  Hz, 1H), 1.22 (s, 9H).  $^{13}\text{C NMR}$  (150 MHz,  $\text{CDCl}_3$ )  $\delta$  169.75, 157.76, 148.33, 143.81, 138.41, 136.52, 134.35, 129.11, 128.08, 127.52, 125.60, 121.87, 121.81, 121.38, 116.66, 109.04, 77.25, 43.37, 39.17, 34.42, 31.77. **HRMS (ESI-TOF)** Calcd for  $\text{C}_{23}\text{H}_{25}\text{N}_2\text{O}_2^+$   $[\text{M}+\text{H}]^+$  361.1916, found 361.1914.

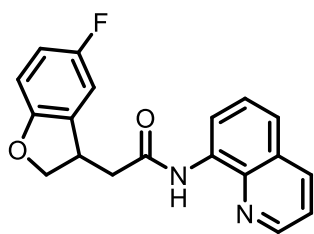

**3ad**

**2-(5-fluoro-2,3-dihydrobenzofuran-3-yl)-N-(quinolin-8-yl)acetamide (3ad):** The title compound was prepared from **1a** (21.2 mg, 0.1 mmol) and 4-fluoro-2-iodophenol (28.6 mg, 0.12 mmol) according to the General Procedure A. Purification using preparative TLC with 3:1 hexanes:EtOAc as the eluent gave the product as a white solid (28.7 mg, 89% yield).  $^1\text{H NMR}$  (600 MHz,  $\text{CDCl}_3$ )  $\delta$  9.84 (s, 1H), 8.80–8.75 (m, 2H), 8.17 (dd,  $J = 8.2, 1.7$  Hz, 1H), 7.59–7.51 (m, 2H), 7.46 (dd,  $J = 8.2, 4.2$  Hz, 1H), 6.99–6.94 (m, 1H), 6.86–6.79 (m, 1H), 6.74–6.69 (m, 1H), 4.86 (t,  $J = 9.1$  Hz, 1H), 4.41 (dd,  $J = 9.2, 6.2$  Hz, 1H), 4.14–4.06 (m, 1H), 3.02 (dd,  $J = 15.6, 5.8$  Hz, 1H), 2.88 (dd,  $J = 15.5, 9.0$  Hz, 1H).  $^{13}\text{C NMR}$  (150 MHz,  $\text{CDCl}_3$ )  $\delta$  169.17, 158.42 (d,  $J = 367.2$  Hz), 148.39, 138.39, 136.57, 134.24, 131.08 (d,  $J = 8.3$  Hz), 128.10, 127.51, 121.99, 121.87, 116.71, 114.92 (d,  $J = 24.3$  Hz), 111.77 (d,  $J = 24.9$  Hz), 109.99 (d,  $J = 8.3$  Hz), 77.56, 42.85, 39.04 (d,  $J = 2.1$  Hz).  $^{19}\text{F NMR}$  (376 MHz,  $\text{CDCl}_3$ )  $\delta$  -124.30. **HRMS (ESI-TOF)** Calcd for  $\text{C}_{19}\text{H}_{16}\text{FN}_2\text{O}_2^+$   $[\text{M}+\text{H}]^+$  323.1196, found 323.1198.

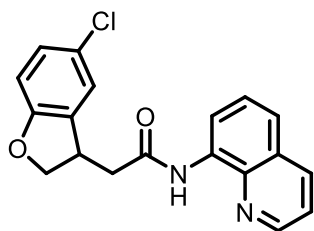

**3ae**

**2-(5-chloro-2,3-dihydrobenzofuran-3-yl)-N-(quinolin-8-yl)acetamide (3ae):** The title compound was prepared from **1a** (21.2 mg, 0.1 mmol) and 4-chloro-2-iodophenol (35.6 mg, 0.12 mmol) according to the General Procedure A. Purification using preparative TLC with 3:1 hexanes:EtOAc as the eluent gave the product as a white solid (25.4 mg, 75% yield).  $^1\text{H NMR}$  (600 MHz,  $\text{CDCl}_3$ )  $\delta$  9.84 (s, 1H), 8.80–8.74 (m, 2H), 8.17 (dd,  $J = 8.3, 1.7$  Hz, 1H), 7.59–7.52 (m, 2H), 7.46 (dd,  $J = 8.3, 4.2$  Hz, 1H), 7.22 (dd,  $J = 2.3, 1.0$  Hz, 1H), 7.10 (ddd,  $J = 8.5, 2.3, 0.8$  Hz, 1H), 6.73 (d,  $J = 8.5$  Hz, 1H), 4.87 (t,  $J = 9.1$  Hz, 1H), 4.42 (dd,  $J = 9.3, 6.2$  Hz, 1H), 4.13–4.05 (m, 1H), 3.04 (dd,  $J = 15.7, 5.5$  Hz, 1H), 2.87 (dd,  $J = 15.6, 9.3$  Hz, 1H).  $^{13}\text{C NMR}$  (150 MHz,  $\text{CDCl}_3$ )  $\delta$  169.12, 158.77, 148.40, 138.39, 136.55, 134.23, 131.61, 128.66, 128.09, 127.50, 125.38, 124.77, 121.99, 121.87, 116.70, 110.81, 77.60, 42.87, 38.77. **HRMS (ESI-TOF)** Calcd for  $\text{C}_{19}\text{H}_{16}\text{ClN}_2\text{O}_2^+$   $[\text{M}+\text{H}]^+$  339.0900, found 339.0894.

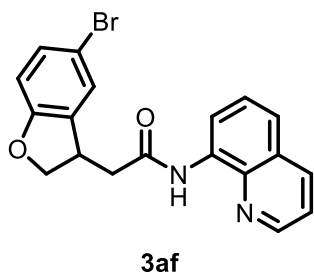

**2-(5-bromo-2,3-dihydrobenzofuran-3-yl)-N-(quinolin-8-yl)acetamide (3af):** The title compound was prepared from **1a** (21.2 mg, 0.1 mmol) and 4-bromo-2-iodophenol (35.8 mg, 0.12 mmol) according to the General Procedure A. Purification using preparative TLC with 3:1 hexanes:EtOAc as the eluent as the eluent gave the product as a white solid (32.1 mg, 84% yield).  $^1\text{H NMR}$  (600 MHz,  $\text{CDCl}_3$ )  $\delta$  9.84 (s, 1H), 8.81–8.73 (m, 2H), 8.17 (dd,  $J = 8.2, 1.7$  Hz, 1H), 7.59–7.52 (m, 2H), 7.46 (dd,  $J = 8.2, 4.2$  Hz, 1H), 7.35 (dd,  $J = 2.1, 1.0$  Hz, 1H), 7.24 (ddd,  $J = 8.5, 2.2, 0.7$  Hz, 1H), 6.69 (d,  $J = 8.5$  Hz, 1H), 4.87 (t,  $J = 9.1$  Hz, 1H), 4.42 (dd,  $J = 9.3, 6.2$  Hz, 1H), 4.13–4.05 (m, 1H), 3.04 (dd,  $J = 15.6, 5.4$  Hz, 1H), 2.87 (dd,  $J = 15.6, 9.3$  Hz, 1H).  $^{13}\text{C NMR}$  (150 MHz,  $\text{CDCl}_3$ )  $\delta$  169.11, 159.29, 148.41, 138.39, 136.55, 134.22, 132.16, 131.57, 128.10, 127.63, 127.50, 121.99, 121.87, 116.70, 112.44, 111.46, 77.58, 42.89, 38.72. **HRMS (ESI-TOF)** Calcd for  $\text{C}_{19}\text{H}_{16}\text{BrN}_2\text{O}_2^+$   $[\text{M}+\text{H}]^+$  383.0395, found 383.0385.

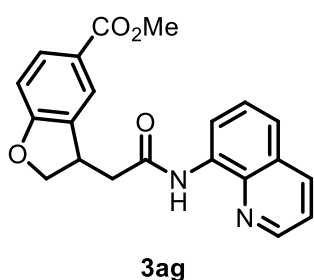

**Methyl 3-(2-oxo-2-(quinolin-8-ylamino)ethyl)-2,3-dihydrobenzofuran-5-carboxylate (3ag):** The title compound was prepared from **1a** (21.2 mg, 0.1 mmol) and methyl 4-hydroxy-3-iodobenzoate (33.4 mg, 0.12 mmol) according to the General Procedure A. Purification using preparative TLC with 3:1 hexanes:EtOAc as the eluent gave the product as a white solid (17.7 mg, 49% yield).  $^1\text{H NMR}$  (600 MHz,  $\text{CDCl}_3$ )  $\delta$  9.84 (s, 1H), 8.87–8.68 (m, 2H), 8.16 (d,  $J = 8.2$  Hz, 1H), 7.94–7.84 (m, 2H), 7.58–7.48 (m, 2H), 7.45 (dd,  $J = 8.3, 4.2$  Hz, 1H), 6.82 (d,  $J = 8.4$  Hz, 1H), 4.96 (t,  $J = 9.2$  Hz, 1H), 4.51 (dd,  $J = 9.5, 6.3$  Hz, 1H), 4.15–4.07 (m, 1H), 3.84 (s, 3H), 3.13 (dd,  $J = 15.7, 4.8$  Hz, 1H), 2.88 (dd,  $J = 15.7, 10.0$  Hz, 1H).  $^{13}\text{C NMR}$  (150 MHz,  $\text{CDCl}_3$ )  $\delta$  169.09, 166.83, 164.08, 148.25, 138.25, 136.40, 134.10, 131.68, 129.90, 127.95, 127.36, 126.26, 122.88, 121.84, 121.73, 116.57, 109.49, 78.11, 51.84, 42.85, 38.06. **HRMS (ESI-TOF)** Calcd for  $\text{C}_{21}\text{H}_{19}\text{N}_2\text{O}_4^+$   $[\text{M}+\text{H}]^+$  363.1345, found 363.1343.

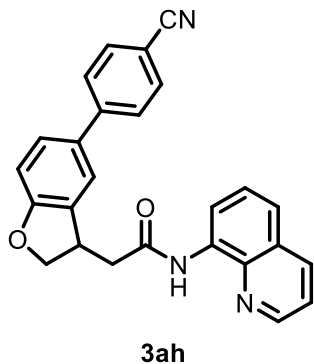

**2-(5-(4-cyanophenyl)-2,3-dihydrobenzofuran-3-yl)-N-(quinolin-8-yl)acetamide (3ah):** The title compound was prepared from **1a** (21.2 mg, 0.1 mmol) and 4'-hydroxy-3'-iodo-[1,1'-biphenyl]-4-carbonitrile (38.5 mg, 0.12 mmol) according to the General Procedure A. Purification using preparative TLC with 3:1 hexanes:EtOAc as the eluent as the eluent gave the product as a white solid (17.0 mg, 42% yield).  $^1\text{H NMR}$  (600 MHz,  $\text{CDCl}_3$ )  $\delta$  9.85 (s, 1H), 8.79 (dd,  $J = 7.2, 1.8$  Hz, 1H), 8.72 (dd,  $J = 4.2, 1.7$  Hz, 1H), 8.17 (dd,  $J = 8.3, 1.7$  Hz, 1H), 7.60–7.54 (m, 4H), 7.52–7.48 (m, 2H), 7.48–7.46 (m, 1H), 7.45 (dd,  $J = 8.2, 4.2$  Hz, 1H), 7.38 (ddd,  $J = 8.3, 2.1, 0.7$  Hz, 1H), 6.91 (d,  $J = 8.3$  Hz, 1H), 4.93 (t,  $J = 9.1$  Hz, 1H), 4.48 (dd,  $J = 9.3, 6.0$  Hz, 1H), 4.17 (tt,  $J = 8.8, 6.1$  Hz, 1H), 3.07 (dd,  $J = 15.3, 6.2$  Hz, 1H), 2.94 (dd,  $J = 15.3, 8.6$  Hz, 1H).  $^{13}\text{C NMR}$  (150 MHz,  $\text{CDCl}_3$ )  $\delta$  169.29, 160.88, 148.38, 145.67, 138.36, 136.58, 134.20, 132.61, 132.12, 130.91, 128.23, 128.11, 127.53, 127.32, 123.68, 122.06, 121.89, 119.24, 116.75, 110.43, 110.07, 77.67, 43.28, 38.76. **HRMS (ESI-TOF)** Calcd for  $\text{C}_{26}\text{H}_{20}\text{N}_3\text{O}_2^+$   $[\text{M}+\text{H}]^+$  406.1556, found 406.1545.

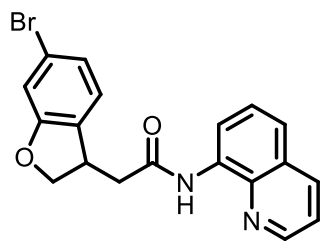

**3ai**

**2-(6-bromo-2,3-dihydrobenzofuran-3-yl)-N-(quinolin-8-yl)acetamide (3ai):** The title compound was prepared from **1a** (21.2 mg, 0.1 mmol) and 5-bromo-2-iodophenol (35.8 mg, 0.12 mmol) according to the General Procedure A. Purification using preparative TLC with 3:1 hexanes:EtOAc as the eluent as the eluent gave the product as a white solid (24.8 mg, 65% yield).  $^1\text{H NMR}$  (600 MHz,  $\text{CDCl}_3$ )  $\delta$  9.83 (s, 1H), 8.87–8.74 (m, 2H), 8.17 (dd,  $J = 8.2, 1.7$  Hz, 1H), 7.59–7.49 (m, 2H), 7.46 (dd,  $J = 8.3, 4.2$  Hz, 1H), 7.10 (dt,  $J = 7.4, 1.0$  Hz, 1H), 7.00–6.95 (m, 2H), 4.86 (t,  $J = 9.1$  Hz, 1H), 4.42 (dd,  $J = 9.3, 6.1$  Hz, 1H), 4.06 (dddd,  $J = 9.0, 8.0, 6.2, 5.2$  Hz, 1H), 3.01 (dd,  $J = 15.5, 5.9$  Hz, 1H), 2.87 (dd,  $J = 15.5, 9.0$  Hz, 1H).  $^{13}\text{C NMR}$  (150 MHz,  $\text{CDCl}_3$ )  $\delta$  169.20, 161.11, 148.40, 138.38, 136.57, 134.24, 129.00, 128.11, 127.50, 125.62, 123.79, 122.00, 121.89, 121.80, 116.70, 113.52, 77.77, 43.00, 38.32. **HRMS (ESI-TOF)** Calcd for  $\text{C}_{19}\text{H}_{16}\text{BrN}_2\text{O}_2^+$   $[\text{M}+\text{H}]^+$  383.0395, found 383.0385

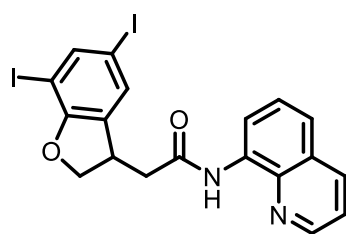

**3aj**

**2-(5,7-diiodo-2,3-dihydrobenzofuran-3-yl)-N-(quinolin-8-yl)acetamide (3aj):** The title compound was prepared from **1a** (21.2 mg, 0.1 mmol) and 2,4,6-triiodophenol (56.5 mg, 0.12 mmol) according to the General Procedure A. Purification using preparative TLC with 3:1 hexanes:EtOAc as the eluent as the eluent gave the product as a white solid (17 mg, 30% yield).  $^1\text{H NMR}$  (600 MHz,  $\text{CDCl}_3$ )  $\delta$  9.84 (s, 1H), 8.79 (dd,  $J = 4.2, 1.7$  Hz, 1H), 8.74 (dd,  $J = 6.8, 2.2$  Hz, 1H), 8.20–8.13 (m, 1H), 7.82–7.74 (m, 1H), 7.60–7.50 (m, 2H), 7.50–7.42 (m, 2H), 4.94 (t,  $J = 9.2$  Hz, 1H), 4.49 (dd,  $J = 9.5, 6.3$  Hz, 1H), 4.21 (tt,  $J = 9.3, 5.8$  Hz, 1H), 3.03 (dd,  $J = 15.7, 5.4$  Hz, 1H), 2.90 (dd,  $J = 15.7, 9.4$  Hz, 1H).  $^{13}\text{C NMR}$  (151 MHz,  $\text{CDCl}_3$ )  $\delta$  168.75, 160.67, 148.46, 144.72, 138.38, 136.59, 134.12, 133.41, 132.1, 128.11, 127.5, 122.10, 121.92, 116.74, 82.51, 77.28, 75.5, 42.90, 39.8. **HRMS (ESI-TOF)** Calcd for  $\text{C}_{19}\text{H}_{14}\text{I}_2\text{N}_2\text{O}_2^+$   $[\text{M}+\text{H}]^+$  556.9223, found 556.9223.

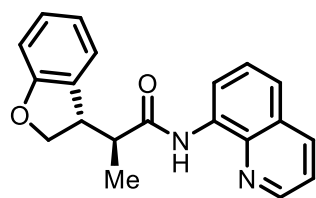

**(±)-4ba**  
*d.r.* = 12:1

**2-(2,3-dihydrobenzofuran-3-yl)-N-(quinolin-8-yl)acetamide ((±)-4ba):** The title compound was prepared from **1b** (22.6 mg, 0.1 mmol) and 2-iodophenol (26.4 mg, 0.12 mmol) according to the General Procedure A. Purification using preparative TLC with 3:1 hexanes:EtOAc as the eluent as the eluent gave the product as a colorless oil (29.2 mg, 96% yield). The reported *d.r.* was determined by  $^1\text{H NMR}$  analysis of purified (±)-**4ba** and is consistent with that of the crude reaction mixture. The following analytical data correspond to the mixture.  $^1\text{H NMR}$  (500 MHz,  $\text{CDCl}_3$ )  $\delta$  9.89 (s, 1.08H), 8.86–8.79 (m, 1.08H), 8.77 (m,  $J = 4.2, 1.7$  Hz, 1.08H), 8.19–8.14 (m, 1.08H), 7.60–7.49 (m, 2.16H), 7.45 (dd,  $J = 8.3, 4.2$  Hz, 1.08H), 7.25–7.18 (m, 1.08H), 7.18–7.08 (m, 1.08H), 6.96–6.83 (m, 0.16H), 6.83–6.73 (m, 2H), 4.69 (t,  $J = 9.3$  Hz, 1.08H), 4.62 (dd,  $J = 9.5, 5.7$  Hz, 1H), 4.49 (dd,  $J = 9.4, 3.9$  Hz, 0.08H), 4.01 (m,  $J = 9.1, 6.2$  Hz, 1H), 3.90–3.78 (m, 0.08H), 2.94 (p,  $J = 7.0$  Hz, 1H), 2.88–2.83 (p, 0.08H), 1.44 (d,  $J = 7.0$  Hz, 0.24H), 1.32 (d,  $J = 7.0$  Hz, 3H).  $^{13}\text{C NMR}$  (126 MHz,  $\text{CDCl}_3$ )  $\delta$  173.64, 160.37, 148.35, 138.55, 136.51, 134.37, 128.79, 128.46, 128.09, 127.49, 124.90, 121.89, 121.81, 120.69, 116.73, 109.73, 73.60, 46.45, 44.70, 14.47. **HRMS (ESI-TOF)** Calcd for  $\text{C}_{20}\text{H}_{19}\text{N}_2\text{O}_2^+$   $[\text{M}+\text{H}]^+$  319.1447, found 319.1448.

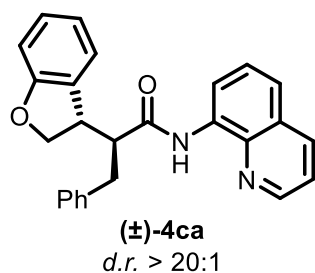

**2-(2,3-dihydrobenzofuran-3-yl)-3-phenyl-N-(quinolin-8-yl)propanamide ((±)-4ca):** The title compound was prepared from **1c** (30.2 mg, 0.1 mmol) and 2-iodophenol (26.4 mg, 0.12 mmol) according to the General Procedure A. Purification using preparative TLC with 3:1 hexanes:EtOAc as the eluent gave the product as a colorless oil (33.9 mg, 86% yield). <sup>1</sup>H NMR (600 MHz, CDCl<sub>3</sub>) δ 9.43 (s, 1H), 8.77 (dd, *J* = 7.5, 1.4 Hz, 1H), 8.60 (dd, *J* = 4.2, 1.6 Hz, 1H), 8.09 (dd, *J* = 8.2, 1.7 Hz, 1H), 7.52 (t, *J* = 7.9 Hz, 1H), 7.50–7.46 (m, 1H), 7.37 (dd, *J* = 8.2, 4.2 Hz, 1H), 7.26–7.23 (m, 1H), 7.20–7.16 (m, 2H), 7.16–7.13 (m, 2H), 7.13–7.08 (m, 1H), 7.06 (d, *J* = 7.2 Hz, 1H), 6.85–6.80 (m, 1H), 6.75 (td, *J* = 7.5, 1.0 Hz, 1H), 4.78 (dd, *J* = 9.5, 5.7 Hz, 1H), 4.72 (t, *J* = 9.2 Hz, 1H), 4.05 (dt, *J* = 9.0, 6.3 Hz, 1H), 3.17 (dd, *J* = 13.5, 10.9 Hz, 1H), 3.07–3.02 (m, 1H), 2.81 (dd, *J* = 13.6, 3.3 Hz, 1H). <sup>13</sup>C NMR (150 MHz, CDCl<sub>3</sub>) δ 172.12, 160.40, 148.06, 139.14, 138.37, 136.24, 134.10, 128.97, 128.95, 128.69, 128.10, 127.91, 127.38, 126.54, 125.04, 121.83, 121.64, 120.82, 116.65, 109.86, 73.98, 55.16, 44.82, 35.81. **HRMS (ESI-TOF)** Calcd for C<sub>26</sub>H<sub>23</sub>N<sub>2</sub>O<sub>2</sub><sup>+</sup> [M+H]<sup>+</sup> 395.1760, found 395.1758.

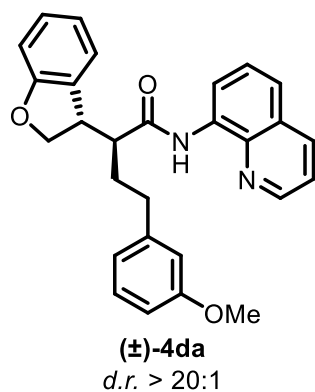

**2-(2,3-dihydrobenzofuran-3-yl)-4-(3-methoxyphenyl)-N-(quinolin-8-yl)butanamide ((±)-4da):** The title compound was prepared from **1d** (34.6 mg, 0.1 mmol) and 2-iodophenol (26.4 mg, 0.12 mmol) according to the General Procedure A. Purification using preparative TLC with 3:1 hexanes:EtOAc as the eluent gave the product as a colorless oil (39.4 mg, 90% yield). <sup>1</sup>H NMR (500 MHz, CDCl<sub>3</sub>) δ 9.82 (s, 1H), 8.89 (dd, *J* = 7.3, 1.6 Hz, 1H), 8.80–8.75 (m, 1H), 8.18 (dd, *J* = 8.3, 1.7 Hz, 1H), 7.63–7.51 (m, 2H), 7.46 (dd, *J* = 8.2, 4.2 Hz, 1H), 7.17 (t, *J* = 7.8 Hz, 1H), 7.11–7.04 (m, 2H), 6.80–6.74 (m, 2H), 6.74–6.66 (m, 3H), 4.69–4.62 (m, 1H), 4.59 (dd, *J* = 9.3, 6.1 Hz, 1H), 3.93 (q, *J* = 7.6 Hz, 1H), 3.72 (s, 3H), 2.86–2.77 (m, 1H), 2.75–2.68 (m, 1H), 2.58 (dt, *J* = 13.9, 8.3 Hz, 1H), 2.33–2.24 (m, 1H), 1.84–1.75 (m, 1H). <sup>13</sup>C NMR (126 MHz, CDCl<sub>3</sub>) δ 172.78, 160.25, 159.88, 148.39, 142.70, 138.58, 136.46, 134.20, 129.62, 128.81, 128.11, 128.06, 127.52, 125.05, 122.06, 121.85, 121.04, 120.67, 116.86, 114.30, 111.72, 109.75, 74.04, 55.22, 51.76, 44.80, 33.67, 31.31. **HRMS (ESI-TOF)** Calcd for C<sub>28</sub>H<sub>27</sub>N<sub>2</sub>O<sub>3</sub><sup>+</sup> [M+H]<sup>+</sup> 439.2022, found 439.2017.

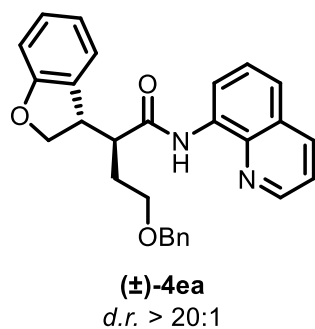

**4-(benzyloxy)-2-(2,3-dihydrobenzofuran-3-yl)-N-(quinolin-8-yl)butanamide ((±)-4ea):** The title compound was prepared from **1e** (34.6 mg, 0.1 mmol) and 2-iodophenol (26.4 mg, 0.12 mmol) according to the General Procedure A. Purification using preparative TLC with 3:1 hexanes:EtOAc as the eluent gave the product as a colorless oil (33.3 mg, 76% yield). <sup>1</sup>H NMR (600 MHz, CDCl<sub>3</sub>) δ 10.11 (s, 1H), 8.89 (dd, *J* = 7.4, 1.5 Hz, 1H), 8.69–8.58 (m, 1H), 8.18 (dd, *J* = 8.3, 1.7 Hz, 1H), 7.62–7.52 (m, 2H), 7.47–7.43 (m, 1H), 7.34–7.30 (m, 2H), 7.25–7.22 (m, 3H), 7.20 (dt, *J* = 7.6, 1.4 Hz, 1H), 7.13–7.09 (m, 1H), 6.82 (d, *J* = 8.0 Hz, 1H), 6.75 (td, *J* = 7.4, 1.0 Hz, 1H), 4.77–4.64 (m, 2H), 4.52 (d, *J* = 11.8 Hz, 1H), 4.42 (d, *J* = 11.9 Hz, 1H), 4.05–3.98 (m, 1H), 3.60–3.53 (m, 2H), 3.17–3.11 (m, 1H), 2.16–2.09 (m, 1H), 1.96–1.85 (m, 1H). <sup>13</sup>C NMR (150 MHz, CDCl<sub>3</sub>) δ 173.01, 160.36, 148.30, 138.63, 138.37, 136.37, 134.45, 128.79, 128.36, 128.32, 128.09, 127.71, 127.59, 127.50, 125.10, 121.90, 121.77, 120.69, 116.80, 109.75, 74.05, 73.20, 67.85, 49.12, 44.40, 29.87. **HRMS (ESI-TOF)** Calcd for C<sub>28</sub>H<sub>27</sub>N<sub>2</sub>O<sub>3</sub><sup>+</sup> [M+H]<sup>+</sup> 439.2022, found 439.2014.

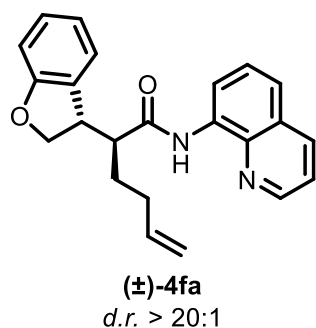

**2-(2,3-dihydrobenzofuran-3-yl)-N-(quinolin-8-yl)hex-5-enamide ((±)-4fa):** The title compound was prepared from **1f** (26.6 mg, 0.1 mmol) and 2-iodophenol (26.4 mg, 0.12 mmol) according to the General Procedure A. Purification using preparative TLC with 3:1 hexanes:EtOAc as the eluent gave the product as a colorless oil (16.5 mg, 46% yield). <sup>1</sup>H NMR (600 MHz, CDCl<sub>3</sub>) δ 9.84–9.81 (m, 1H), 8.87 (dd, *J* = 7.4, 1.5 Hz, 1H), 8.75 (dd, *J* = 4.1, 1.7 Hz, 1H), 8.17 (dd, *J* = 8.3, 1.7 Hz, 1H), 7.64–7.50 (m, 2H), 7.45 (dd, *J* = 8.2, 4.2 Hz, 1H), 7.22–7.15 (m, 1H), 7.08 (tdd, *J* = 8.1, 1.4, 0.7 Hz, 1H), 6.79 (ddt, *J* = 8.0, 1.0, 0.5 Hz, 1H), 6.71 (td, *J* = 7.4, 1.0 Hz, 1H), 5.80–5.70 (m, 1H), 5.12–4.95 (m, 2H), 4.71–4.60 (m, 2H), 3.93 (q, *J* = 7.6 Hz, 1H), 2.77 (ddd, *J* = 10.7, 7.8, 3.1 Hz, 1H), 2.28–2.19 (m, 1H), 2.15–2.08 (m, 1H), 2.08–2.01 (m, 1H), 1.60–1.55 (m, 1H). <sup>13</sup>C NMR (150 MHz, CDCl<sub>3</sub>) δ 172.21, 159.66, 147.75, 137.96, 136.96, 135.85, 133.61, 128.21, 127.65, 127.49, 126.92, 124.48, 121.39, 121.22, 120.11, 116.21, 115.57, 109.17, 73.50, 51.38, 44.19, 31.12, 28.49. **HRMS (ESI-TOF)** Calcd for C<sub>23</sub>H<sub>23</sub>N<sub>2</sub>O<sub>2</sub><sup>+</sup> [M+H]<sup>+</sup> 359.1760, found 359.1767.

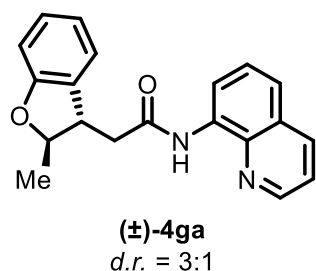

**2-(2-methyl-2,3-dihydrobenzofuran-3-yl)-N-(quinolin-8-yl)acetamide ((±)-4ga):** The title compound was prepared from **1g** (22.6 mg, 0.1 mmol) and 2-iodophenol (26.4 mg, 0.12 mmol) according to the General Procedure A. Purification using preparative TLC with 3:1 hexanes:EtOAc as the eluent gave the product as a white solid (29.6 mg, 93% yield). The reported *d.r.* was determined by <sup>1</sup>H NMR analysis of purified (±)-**4ga** and is consistent with that of the crude reaction mixture. The diastereomers were separated on a Waters Autopurification LC with a Waters BEH C18 column (5 μm, 19×160 mm) using a 0.1% aqueous formic acid:acetonitrile gradient (30 mL/min, main segment of gradient at 55–75% acetonitrile over 8 minutes) at ambient temperature. The following analytical data correspond to the major diastereomer. <sup>1</sup>H NMR (600 MHz, CDCl<sub>3</sub>) δ 9.84 (s, 1H), 8.81 (dd, *J* = 7.4, 1.6 Hz, 1H), 8.78–8.75 (m, 1H), 8.17 (dd, *J* = 8.2, 1.7 Hz, 1H), 7.59–7.55 (m, 1H), 7.53 (dd, *J* = 8.3, 1.6 Hz, 1H), 7.48–7.42 (m, 1H), 7.25–7.21 (m, 1H), 7.14 (dddd, *J* = 8.1, 7.5, 1.4, 0.7 Hz, 1H), 6.84 (td, *J* = 7.4, 1.0 Hz, 1H), 6.80 (ddt, *J* = 8.0, 1.0, 0.5 Hz, 1H), 4.70 (dd, *J* = 6.4, 5.6 Hz, 1H), 3.71 (dt, *J* = 8.4, 5.9 Hz, 1H), 2.97 (dd, *J* = 15.3, 6.2 Hz, 1H), 2.85 (dd, *J* = 15.3, 8.5 Hz, 1H), 1.51 (d, *J* = 6.3 Hz, 3H). <sup>13</sup>C NMR (150 MHz, CDCl<sub>3</sub>) δ 169.47, 159.13, 148.37, 138.43, 136.53, 134.36, 129.62, 128.78, 128.11, 127.54, 124.83, 121.90, 121.85, 120.62, 116.71, 109.89, 85.32, 45.81, 43.28, 21.36. **HRMS (ESI-TOF)** Calcd for C<sub>20</sub>H<sub>19</sub>N<sub>2</sub>O<sub>2</sub><sup>+</sup> [M+H]<sup>+</sup> 319.1447, found 319.1448. **X-ray** (single-crystal) Colorless needles of X-ray diffraction quality were obtained by vapor diffusion of hexane into a saturated solution of **4ga** in toluene (CCDC 1999888).<sup>16</sup>

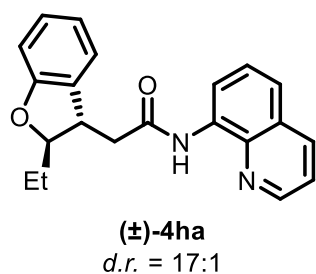

**2-(2-ethyl-2,3-dihydrobenzofuran-3-yl)-N-(quinolin-8-yl)acetamide ((±)-4ha):** The title compound was prepared from **1h** (24.0 mg, 0.1 mmol) and 2-iodophenol (26.4 mg, 0.12 mmol) according to the General Procedure A. Purification using preparative TLC with 3:1 hexanes:EtOAc as the eluent gave the product as a white solid (24.6 mg, 74% yield). The reported *d.r.* was determined by <sup>1</sup>H NMR analysis of purified (±)-**4ha** and is consistent with that of the crude reaction mixture. The following analytical data correspond to the major diastereomer. <sup>1</sup>H NMR (600 MHz, CDCl<sub>3</sub>) δ 9.83 (s, 1H), 8.81 (dd, *J* = 7.5, 1.5 Hz, 1H), 8.77 (dd, *J* = 4.2, 1.7 Hz, 1H), 8.17 (dd, *J* = 8.3, 1.7 Hz, 1H), 7.58–7.55 (m, 1H), 7.53 (dd, *J* = 8.3, 1.5 Hz,

1H), 7.45 (dd,  $J = 8.2, 4.2$  Hz, 1H), 7.25–7.21 (m, 1H), 7.13 (dddd,  $J = 8.1, 7.5, 1.4, 0.7$  Hz, 1H), 6.85–6.77 (m, 2H), 4.51 (dt,  $J = 7.0, 5.3$  Hz, 1H), 3.78 (q,  $J = 6.6$  Hz, 1H), 2.95 (dd,  $J = 15.1, 6.5$  Hz, 1H), 2.85 (dd,  $J = 15.1, 8.1$  Hz, 1H), 1.88–1.75 (m, 2H), 1.05 (t,  $J = 7.4$  Hz, 3H).  $^{13}\text{C}$  NMR (150 MHz,  $\text{CDCl}_3$ )  $\delta$  168.87, 158.78, 147.63, 137.84, 135.91, 133.77, 129.18, 128.13, 127.50, 126.93, 124.24, 121.27, 121.24, 119.90, 116.11, 109.14, 89.53, 43.25, 43.13, 27.96, 9.13. HRMS (ESI-TOF) Calcd for  $\text{C}_{21}\text{H}_{21}\text{N}_2\text{O}_2^+$   $[\text{M}+\text{H}]^+$  333.1603, found 333.1607.

### General Procedure B for [3+2] Indoline Synthesis

To a 4-mL scintillation vial equipped with a Teflon-coated magnetic stir bar were added the  $\text{Pd}(\text{OAc})_2$  (1.1 mg, 0.005 mmol, 5 mol%), alkene substrate (21.2 mg, 0.1 mmol), the appropriate *ortho*-iodoaniline substrate (0.12 mmol, 1.2 equiv),  $\text{K}_2\text{CO}_3$  (13.8 mg, 0.1 mmol, 1 equiv), and HFIP (0.2 mL). The vial was sealed with a screw-top septum cap and placed in a heating block that was pre-heated to 80 °C. The reaction was allowed to run for 24 h and then was cooled to room temperature. The reaction mixture was then filtered through a short plug of Celite, and concentrated to afford a brown residue, which, upon purification by preparative TLC, afforded pure product.

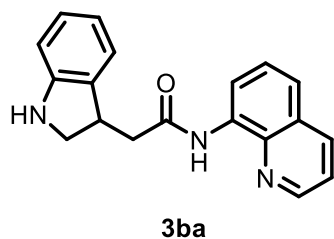

**2-(indolin-3-yl)-*N*-(quinolin-8-yl)acetamide (3ba):** The title compound was prepared from **1a** (21.2 mg, 0.1 mmol) and 2-iodoaniline (26.3 mg, 0.12 mmol) according to the General Procedure B. Purification using preparative TLC with 1:1 hexanes:EtOAc as the eluent gave the product as a yellow solid (22.7 mg, 75% yield).  $^1\text{H}$  NMR (600 MHz,  $\text{CDCl}_3$ )  $\delta$  9.84 (s, 1H), 8.81 (dd,  $J = 7.5, 1.5$  Hz, 1H), 8.77 (dd,  $J = 4.2, 1.7$  Hz, 1H), 8.16 (dd,  $J = 8.2, 1.7$  Hz, 1H), 7.56 (dd,  $J = 8.3, 7.5$  Hz, 1H), 7.52 (dd,  $J = 8.3, 1.5$  Hz, 1H), 7.45 (dd,  $J = 8.2, 4.2$  Hz, 1H), 7.19 (dtd,  $J = 7.3, 1.1, 0.6$  Hz, 1H), 7.08–7.03 (m, 1H), 6.72 (td,  $J = 7.4, 1.0$  Hz, 1H), 6.70–6.65 (m, 1H), 3.97 (tt,  $J = 8.8, 6.0$  Hz, 1H), 3.88 (t,  $J = 8.9$  Hz, 1H), 3.79 (s, 1H), 3.42 (dd,  $J = 9.1, 6.3$  Hz, 1H), 3.01 (dd,  $J = 15.1, 5.7$  Hz, 1H), 2.85 (dd,  $J = 15.1, 9.0$  Hz, 1H).  $^{13}\text{C}$  NMR (150 MHz,  $\text{CDCl}_3$ )  $\delta$  170.27, 151.39, 148.34, 138.47, 136.50, 134.52, 131.67, 128.09, 127.55, 124.25, 121.78, 121.73, 119.01, 116.65, 109.83, 53.44, 42.86, 39.02. HRMS (ESI-TOF) Calcd for  $\text{C}_{19}\text{H}_{18}\text{N}_3\text{O}^+$   $[\text{M}+\text{H}]^+$  304.1450, found 304.1453.

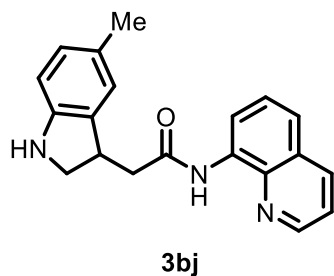

**2-(5-methylindolin-3-yl)-*N*-(quinolin-8-yl)acetamide (3bj):** The title compound was prepared from **1a** (21.2 mg, 0.1 mmol) and 2-iodo-4-methylaniline (28.0 mg, 0.12 mmol) according to the General Procedure B. Purification using preparative TLC with 1:1 hexanes:EtOAc as the eluent gave the product as a yellow solid (15.9 mg, 50% yield).  $^1\text{H}$  NMR (600 MHz,  $\text{CDCl}_3$ )  $\delta$  9.83 (s, 1H), 8.81 (dd,  $J = 7.5, 1.4$  Hz, 1H), 8.77 (dd,  $J = 4.2, 1.7$  Hz, 1H), 8.16 (dd,  $J = 8.2, 1.7$  Hz, 1H), 7.57–7.54 (m, 1H), 7.52 (dd,  $J = 8.3, 1.5$  Hz, 1H), 7.45 (dd,  $J = 8.2, 4.2$  Hz, 1H), 7.02–7.00 (m, 1H), 6.89–6.84 (m, 1H), 6.59 (d,  $J = 7.8$  Hz, 1H), 3.92 (tt,  $J = 8.8, 5.8$  Hz, 1H), 3.86 (t,  $J = 8.9$  Hz, 1H), 3.71 (br, 1H), 3.40 (dd,  $J = 9.1, 6.2$  Hz, 1H), 3.00 (dd,  $J = 15.1, 5.5$  Hz, 1H), 2.83 (dd,  $J = 15.1, 8.9$  Hz, 1H), 2.22 (s, 3H).  $^{13}\text{C}$  NMR (150 MHz,  $\text{CDCl}_3$ )  $\delta$  170.34, 149.02, 148.31, 138.47, 136.48, 134.53, 132.04, 128.45, 128.43, 128.08,

127.55, 124.95, 116.64, 109.87, 53.70, 42.83, 39.17, 20.95. **HRMS (ESI-TOF)** Calcd for  $C_{20}H_{20}N_3O^+$   $[M+H]^+$  318.1606, found 318.1614.

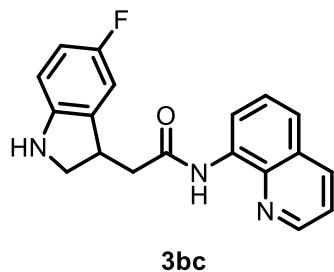

**2-(5-fluoroindolin-3-yl)-N-(quinolin-8-yl)acetamide (3bc):** The title compound was prepared from **1a** (21.2 mg, 0.1 mmol) and 4-fluoro-2-iodoaniline (28.4 mg, 0.12 mmol) according to the General Procedure B. Purification using preparative TLC with 1:1 hexanes:EtOAc as the eluent gave the product as a yellow solid (23.4 mg, 73% yield). **<sup>1</sup>H NMR** (600 MHz,  $CDCl_3$ )  $\delta$  9.83 (s, 1H), 8.78 (dd,  $J = 12.6, 5.8$  Hz, 2H), 8.16 (d,  $J = 8.2$  Hz, 1H), 7.58–7.50 (m, 2H), 7.45 (dd,  $J = 8.3, 4.2$  Hz, 1H), 6.92 (dd,  $J = 8.4, 2.7$  Hz, 1H), 6.74 (td,  $J = 8.9, 2.7$  Hz, 1H), 6.56 (dd,  $J = 8.5, 4.3$  Hz, 1H), 4.00–3.91 (m, 1H), 3.88 (t,  $J = 8.9$  Hz, 1H), 3.70 (br, 1H), 3.42 (dd,  $J = 9.1, 6.1$  Hz, 1H), 2.97 (dd,  $J = 15.2, 5.8$  Hz, 1H), 2.85 (dd,  $J = 15.1, 8.6$  Hz, 1H). **<sup>13</sup>C NMR** (150 MHz,  $CDCl_3$ )  $\delta$  169.83, 157.21 (d,  $J = 235.5$  Hz), 148.33, 147.35, 138.42, 136.50, 134.40, 133.45 (d,  $J = 7.8$  Hz), 128.08, 127.52, 121.82, 121.80, 116.67, 114.11 (d,  $J = 23.2$  Hz), 111.72 (d,  $J = 23.9$  Hz), 110.10 (d,  $J = 8.2$  Hz), 53.98, 42.48, 39.27 (d,  $J = 2.1$  Hz). **<sup>19</sup>F NMR** (376 MHz,  $CDCl_3$ )  $\delta$  -126.17. **HRMS (ESI-TOF)** Calcd for  $C_{19}H_{17}FN_3O^+$   $[M+H]^+$  322.1356, found 322.1362.

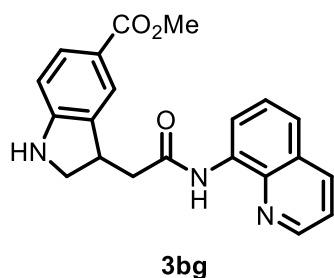

**Methyl 3-(2-oxo-2-(quinolin-8-ylamino)ethyl)indoline-5-carboxylate (3bg):** The title compound was prepared from **1a** (21.2 mg, 0.1 mmol) and methyl 4-amino-3-iodobenzoate (33.2 mg, 0.12 mmol) according to the General Procedure B. Purification using preparative TLC with 1:1 hexanes:EtOAc as the eluent gave the product as a yellow solid (30.0 mg, 83% yield). **<sup>1</sup>H NMR** (600 MHz,  $CDCl_3$ )  $\delta$  9.83 (s, 1H), 8.80–8.74 (m, 2H), 8.16 (dd,  $J = 8.2, 1.7$  Hz, 1H), 7.83 (s, 1H), 7.81–7.78 (m, 1H), 7.57–7.53 (m, 1H), 7.52 (dd,  $J = 8.3, 1.5$  Hz, 1H), 7.45 (dd,  $J = 8.2, 4.2$  Hz, 1H), 6.57 (d,  $J = 8.2$  Hz, 1H), 4.16 (s, 1H), 4.03–3.92 (m, 2H), 3.81 (s, 3H), 3.55 (dd,  $J = 8.3, 5.2$  Hz, 1H), 3.11–3.04 (dd, 1H), 2.88–2.80 (dd, 1H). **<sup>13</sup>C NMR** (150 MHz,  $CDCl_3$ )  $\delta$  169.88, 167.41, 155.62, 148.34, 138.44, 136.48, 134.41, 131.50, 130.99, 128.07, 127.52, 125.83, 121.81, 121.79, 119.95, 116.65, 107.87, 53.51, 51.68, 42.80, 38.21. **HRMS (ESI-TOF)** Calcd for  $C_{21}H_{20}N_3O_3^+$   $[M+H]^+$  362.1499, found 362.1499.

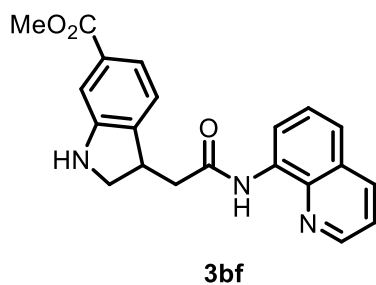

**Methyl 3-(2-oxo-2-(quinolin-8-ylamino)ethyl)indoline-6-carboxylate (3bf):** To an 8-mL scintillation vial equipped with a Teflon-coated magnetic stir bar were added the  $Pd(OAc)_2$  (2.6 mg, 0.0118 mmol, 5 mol%), **1a** (50 mg, 0.24 mmol), methyl 3-amino-4-iodobenzoate (78 mg, 0.28 mmol),  $K_2CO_3$  (32.6 mg, 0.236 mmol, 1 equiv), and HFIP (0.48 mL). The vial was sealed with a screw-top septum cap and placed in a heating block that was pre-heated to 80 °C. The reaction was allowed to run for 24 h and then was cooled to room temperature. The reaction mixture was then filtered through an autovial syringeless filter device, and concentrated to afford a brown residue, which, upon purification by ISCO automated silica gel column chromatography using an eluent system of 0–100% EtOAc/heptane, afforded the product as a yellow solid (79 mg, 93% yield). **<sup>1</sup>H NMR** (400 MHz,  $CDCl_3$ )  $\delta$  = 9.84 (br s, 1H), 8.81 (dd,  $J = 1.7, 7.2$  Hz, 1H), 8.77 (dd,  $J = 1.7, 4.2$  Hz, 1H), 8.18 (dd,  $J = 1.6, 8.3$  Hz, 1H), 7.60–7.51 (m, 2H), 7.49–7.40 (m, 2H), 7.29 (d,  $J = 1.3$  Hz, 1H), 7.23 (d,  $J = 7.7$  Hz, 1H), 4.03–3.91 (m, 2H), 3.90 (br, 1H), 3.88 (s, 3H), 3.48 (dd,  $J = 6.0, 8.9$  Hz, 1H), 3.06–2.97 (m, 1H),

2.92–2.81 (m, 1H)  $^{13}\text{C}$  NMR (100 MHz,  $\text{CDCl}_3$ )  $\delta$  169.64, 167.40, 151.41, 148.17, 138.28, 136.91, 136.40, 134.27, 130.11, 127.97, 127.40, 123.81, 121.69, 121.65, 120.84, 116.58, 109.95, 53.39, 51.94, 42.35, 38.76. **HRMS (ESI-TOF)** Calcd for  $\text{C}_{21}\text{H}_{20}\text{N}_3\text{O}_3^+$   $[\text{M}+\text{H}]^+$  362.14992, found 362.15175.

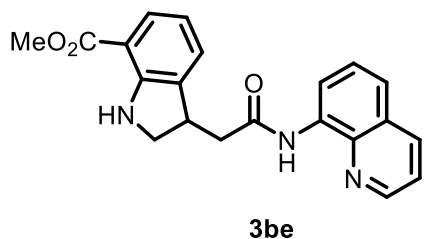

**Methyl 3-(2-oxo-2-(quinolin-8-ylamino)ethyl)indoline-7-carboxylate (3be):** To an 8-mL scintillation vial equipped with a Teflon-coated magnetic stir bar were added the  $\text{Pd}(\text{OAc})_2$  (2.6 mg, 0.0118 mmol, 5 mol%), **1a** (50 mg, 0.24 mmol) and methyl 2-amino-3-iodobenzoate (78 mg, 0.28 mmol),  $\text{K}_2\text{CO}_3$  (32.6 mg, 0.236 mmol, 1 equiv), and HFIP (0.48 mL). The vial was sealed with a screw-top septum cap and placed in a heating

block that was pre-heated to 80 °C. The reaction was allowed to run for 24 h and then was cooled to room temperature. The reaction mixture was then filtered through an autovial syringeless filter device, and concentrated to afford a brown residue, which, upon purification by ISCO automated silica gel column chromatography using an eluent system of 0–100% EtOAc/heptane, afforded the product as a yellow solid (65 mg, 76% yield).  $^1\text{H}$  NMR (400 MHz,  $\text{CDCl}_3$ )  $\delta$  = 9.84 (br s, 1H), 8.81 (dd,  $J$  = 1.6, 7.2 Hz, 1H), 8.78 (dd,  $J$  = 1.7, 4.2 Hz, 1H), 8.17 (dd,  $J$  = 1.6, 8.3 Hz, 1H), 7.61 (d,  $J$  = 8.1 Hz, 1H), 7.59–7.51 (m, 2H), 7.46 (dd,  $J$  = 4.2, 8.3 Hz, 1H), 7.27–7.25 (m, 1H), 6.58 (dd,  $J$  = 7.2, 8.0 Hz, 1H), 6.09 (s, 1H), 4.07–3.94 (m, 2H), 3.88 (s, 3H), 3.62–3.54 (m, 1H), 3.04–2.95 (m, 1H), 2.91–2.79 (m, 1H)  $^{13}\text{C}$  NMR (100 MHz,  $\text{CDCl}_3$ )  $\delta$  169.72, 167.99, 153.94, 148.20, 138.32, 136.35, 134.30, 133.14, 128.62, 128.29, 127.96, 127.39, 121.66, 116.54, 116.35, 108.21, 52.98, 51.45, 43.01, 37.64. **HRMS (ESI-TOF)** Calcd for  $\text{C}_{21}\text{H}_{20}\text{N}_3\text{O}_3^+$   $[\text{M}+\text{H}]^+$  362.14992, found 362.14994.

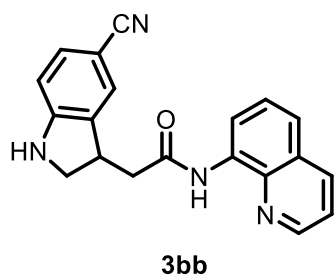

**2-(5-cyanoindolin-3-yl)-N-(quinolin-8-yl)acetamide (3bb):** The title compound was prepared from **1a** (21.2 mg, 0.1 mmol) and 4-amino-3-iodobenzonitrile (29.3 mg, 0.12 mmol) according to the General Procedure B. Purification using preparative TLC with 1:1 hexanes:EtOAc as the eluent gave the product as a yellow solid (32.5 mg, 99% yield).  $^1\text{H}$  NMR (600 MHz,  $\text{CDCl}_3$ )  $\delta$  9.83 (s, 1H), 8.81–8.74 (m, 2H), 8.17 (dd,  $J$  = 8.3, 1.7 Hz, 1H), 7.63–7.50 (m, 2H), 7.46 (dd,  $J$  = 8.2, 4.2 Hz, 1H), 7.39 (dd,  $J$  = 1.6, 0.8 Hz, 1H), 7.32 (dd,  $J$  = 8.1,

1.7 Hz, 1H), 6.56 (d,  $J$  = 8.2 Hz, 1H), 4.26 (s, 1H), 4.02–3.95 (m, 2H), 3.57–3.50 (m, 1H), 3.03–2.94 (m, 1H), 2.92–2.81 (m, 1H).  $^{13}\text{C}$  NMR (150 MHz,  $\text{CDCl}_3$ )  $\delta$  168.75, 154.41, 147.80, 137.80, 135.97, 133.65, 133.22, 131.34, 127.51, 127.42, 126.92, 121.38, 121.28, 120.10, 116.11, 107.91, 99.44, 52.58, 42.03, 37.36. **HRMS (ESI-TOF)** Calcd for  $\text{C}_{20}\text{H}_{17}\text{N}_4\text{O}^+$   $[\text{M}+\text{H}]^+$  329.1402, found 329.1405.

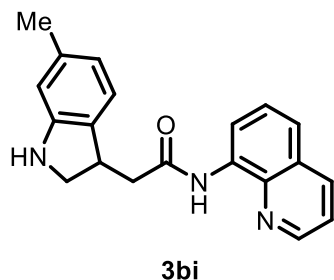

**2-(6-methylindolin-3-yl)-N-(quinolin-8-yl)acetamide (3bi):** The title compound was prepared from **1a** (21.2 mg, 0.1 mmol) and 2-iodo-5-methylaniline (28.0 mg, 0.12 mmol) according to the General Procedure B. Purification using preparative TLC with 1:1 hexanes:EtOAc as the eluent gave the product as a yellow solid (19.3 mg, 61% yield).  $^1\text{H}$  NMR (600 MHz,  $\text{CDCl}_3$ )  $\delta$  9.84 (s, 1H), 8.81 (dd,  $J$  = 7.5, 1.4 Hz, 1H), 8.77 (dd,  $J$  = 4.2, 1.7 Hz, 1H), 8.16 (dd,  $J$  = 8.3, 1.7 Hz, 1H), 7.58–7.53 (m, 1H), 7.52 (dd,  $J$  = 8.3, 1.5 Hz, 1H), 7.45



(dd,  $J = 8.2, 4.2$  Hz, 1H), 7.07 (d,  $J = 7.5$  Hz, 1H), 6.55–6.52 (m, 1H), 6.52–6.49 (m, 1H), 3.95–3.90 (m, 1H), 3.87 (t,  $J = 8.8$  Hz, 1H), 3.40 (dd,  $J = 8.9, 6.0$  Hz, 1H), 2.98 (dd,  $J = 15.0, 5.6$  Hz, 1H), 2.82 (dd,  $J = 15.1, 8.8$  Hz, 1H), 2.26 (s, 3H).  $^{13}\text{C NMR}$  (150 MHz,  $\text{CDCl}_3$ )  $\delta$  170.35, 151.62, 148.31, 138.46, 138.04, 136.48, 134.54, 128.85, 128.08, 127.55, 123.93, 121.77, 121.70, 119.74, 116.64, 110.70, 53.66, 43.00, 38.72, 21.63. **HRMS (ESI-TOF)** Calcd for  $\text{C}_{20}\text{H}_{20}\text{N}_3\text{O}^+$   $[\text{M}+\text{H}]^+$  318.1606, found 318.1610.

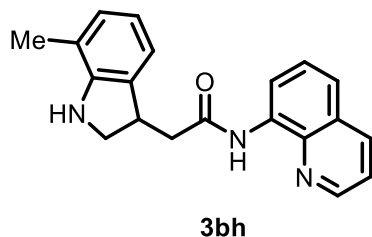

**2-(7-methylindolin-3-yl)-N-(quinolin-8-yl)acetamide (3bh):** To an 8-mL scintillation vial equipped with a Teflon-coated magnetic stir bar were added the  $\text{Pd}(\text{OAc})_2$  (2.6 mg, 0.0118 mmol, 5 mol%), **1a** (50 mg, 0.24 mmol) and 2-bromo-6-methylaniline (52.6 mg, 0.28 mmol),  $\text{K}_2\text{CO}_3$  (32.6 mg, 0.236 mmol, 1 equiv), and HFIP (0.48 mL). The vial was sealed with a screw-top septum cap and placed in a heating block that was pre-heated to 80 °C. The reaction was allowed to run for 24 h and then was cooled to room temperature. The reaction mixture was then filtered through an autovial syringeless filter device, and concentrated to afford a brown residue, which, upon purification by ISCO automated silica gel column chromatography using an eluent system of 0–100% EtOAc/heptane, afforded the product as a yellow solid (49 mg, 66% yield).  $^1\text{H NMR}$  (600 MHz,  $\text{CDCl}_3$ )  $\delta = 9.85$  (br s, 1H), 8.82 (br d,  $J = 6.5$  Hz, 1H), 8.78 (dd,  $J = 1.4, 4.1$  Hz, 1H), 8.17 (dd,  $J = 1.3, 8.3$  Hz, 1H), 7.617.49 (m, 2H), 7.46 (dd,  $J = 4.2, 8.2$  Hz, 1H), 7.07 (d,  $J = 7.3$  Hz, 1H), 6.92 (d,  $J = 7.3$  Hz, 1H), 6.69 (t,  $J = 7.5$  Hz, 1H), 4.07–3.97 (m, 1H), 3.96–3.86 (m, 1H), 3.60 (br, 1H), 3.46 (dd,  $J = 6.2, 9.0$  Hz, 1H), 3.02 (dd,  $J = 5.5, 15.2$  Hz, 1H), 2.85 (dd,  $J = 8.9, 15.2$  Hz, 1H), 2.16 (s, 3H)  $^{13}\text{C NMR}$  (150 MHz,  $\text{CDCl}_3$ )  $\delta$  170.32, 149.91, 148.31, 138.50, 136.47, 134.57, 131.04, 129.02, 128.10, 127.55, 121.76, 121.70, 119.32, 119.21, 116.67, 53.34, 43.02, 39.41, 16.89. **HRMS (ESI-TOF)** Calcd for  $\text{C}_{20}\text{H}_{20}\text{N}_3\text{O}^+$   $[\text{M}+\text{H}]^+$  318.1606, found 318.1618.

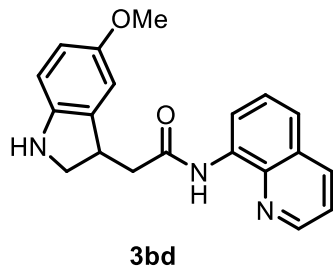

**2-(5-methoxyindolin-3-yl)-N-(quinolin-8-yl)acetamide (3bd):** To an 8-mL scintillation vial equipped with a Teflon-coated magnetic stir bar were added the  $\text{Pd}(\text{OAc})_2$  (2.6 mg, 0.0118 mmol, 5 mol%), alkene substrate **1a** (50 mg, 0.24 mmol), 2-iodo-4-methoxyaniline (70.4 mg, 0.28 mmol, 1.2 equiv),  $\text{K}_2\text{CO}_3$  (32.6 mg, 0.236 mmol, 1 equiv), and HFIP (0.48 mL). The vial was sealed with a screw-top septum cap and placed in a heating block that was pre-heated to 80 °C. The reaction was allowed to run for 24 h and then was cooled to room temperature. The reaction mixture was then filtered through an autovial syringeless filter device, and concentrated to afford a brown residue, which, upon purification by ISCO automated silica gel column chromatography using an eluent system of 0–100% EtOAc/heptane, afforded pure product as a dark red solid (37.1 mg, 47% yield).  $^1\text{H NMR}$  (400 MHz,  $\text{CDCl}_3$ )  $\delta = 9.95$ –9.77 (m, 1H), 8.87–8.72 (m, 2H), 8.19–8.14 (m, 1H), 7.59–7.50 (m, 2H), 7.49–7.42 (m, 1H), 6.87–6.81 (m, 1H), 6.83–6.76 (m, 1H), 6.71–6.65 (m, 1H), 4.04–3.88 (m, 2H), 3.75 (s, 3H), 3.53–3.47 (m, 1H), 3.06–2.81 (m, 2H)  $^{13}\text{C NMR}$  (100 MHz,  $\text{CDCl}_3$ )  $\delta = 169.94, 154.04, 148.18, 144.28, 138.34, 136.32, 134.36, 133.52, 127.95, 127.38, 121.63, 121.61, 116.54, 113.36, 111.02, 110.75, 55.95, 53.69, 42.57, 39.49$  **HRMS (ESI-TOF)** Calcd for  $\text{C}_{20}\text{H}_{20}\text{N}_3\text{O}_2^+$   $[\text{M}+\text{H}]^+$  334.15398, found 334.15500.

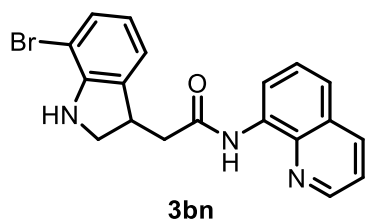

**2-(7-bromoindolin-3-yl)-N-(quinolin-8-yl)acetamide (3bn):** To an 8-mL scintillation vial equipped with a Teflon-coated magnetic stir bar were added the Pd(OAc)<sub>2</sub> (2.6 mg, 0.0118 mmol, 5 mol%), alkene substrate **1a** (50 mg, 0.24 mmol), 2-bromo-6-iodoaniline (84.2 mg, 0.28 mmol, 1.2 equiv), K<sub>2</sub>CO<sub>3</sub> (32.6 mg, 0.236 mmol, 1 equiv), and HFIP (0.48 mL). The vial was sealed with a screw-top septum cap and placed in a heating block that was pre-heated to 80 °C. The reaction was allowed to run for 24 h and then was cooled to room temperature. The reaction mixture was then filtered through an autovial syringeless filter device, and concentrated to afford a brown residue, which, upon purification by ISCO automated silica gel column chromatography using an eluent system of 0–100% EtOAc/heptane, afforded pure product as a white solid (28.8 mg, 32% yield). <sup>1</sup>H NMR (400 MHz, CDCl<sub>3</sub>) δ = 9.86 (br s, 1H), 8.84–8.78 (m, 2H), 8.19 (dd, *J* = 1.6, 8.3 Hz, 1H), 7.60–7.53 (m, 2H), 7.48 (dd, *J* = 4.2, 8.3 Hz, 1H), 7.22 (d, *J* = 7.9 Hz, 1H), 7.12 (d, *J* = 7.2 Hz, 1H), 6.59 (t, *J* = 7.7 Hz, 1H), 4.14–4.01 (m, 2H), 4.01–3.93 (m, 1H), 3.51 (dd, *J* = 6.0, 9.2 Hz, 1H), 3.01 (dd, *J* = 5.9, 15.2 Hz, 1H), 2.94–2.86 (m, 1H). <sup>13</sup>C NMR (100 MHz, CDCl<sub>3</sub>) δ = 169.66, 149.73, 148.20, 138.32, 136.35, 134.30, 132.73, 130.49, 127.95, 127.38, 122.97, 121.66, 119.82, 116.54, 103.35, 52.72, 42.67, 39.93. HRMS (ESI-TOF) Calcd for C<sub>19</sub>H<sub>17</sub>BrN<sub>3</sub>O<sup>+</sup> [M+H]<sup>+</sup> 382.05495, found 382.05658.

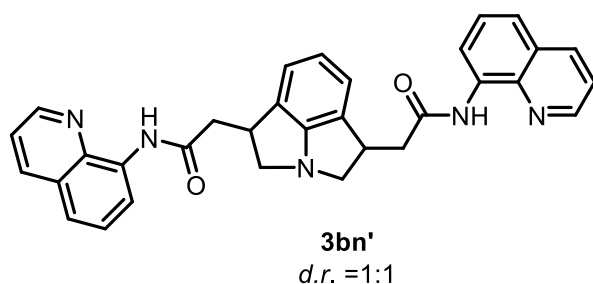

**2,2'-(1,2,4,5-tetrahydropyrrolo[3,2,1-hi]indole-1,5-diyl)bis(N-(quinolin-8-yl)acetamide) (3bn'):** To an 8-mL scintillation vial equipped with a Teflon-coated magnetic stir bar were added the Pd(OAc)<sub>2</sub> (2.6 mg, 0.0118 mmol, 5 mol%), alkene substrate **1a** (50 mg, 0.24 mmol), 2-bromo-6-iodoaniline (84.2 mg, 0.28 mmol, 1.2 equiv), K<sub>2</sub>CO<sub>3</sub> (32.6 mg, 0.236 mmol, 1 equiv), and HFIP (0.48 mL). The vial was sealed with a screw-top septum cap and placed in a heating block that was pre-heated to 80 °C. The reaction was allowed to run for 24 h and then was cooled to room temperature. The reaction mixture was then filtered through an autovial syringeless filter device, and concentrated to afford a brown residue, which, upon purification by ISCO automated silica gel column chromatography using an eluent system of 0–100% EtOAc/heptane, afforded pure product as a yellow foam (36.5 mg, 59% yield). The reported *d.r.* was determined by <sup>1</sup>H NMR analysis of purified **3bn'** and is consistent with that of the crude reaction mixture. <sup>1</sup>H NMR (400 MHz, CDCl<sub>3</sub>) δ = 9.93–9.85 (m, 2H), 8.86–8.79 (m, 4H), 8.22–8.13 (m, 2H), 7.61–7.45 (m, 6H), 7.03 (d, *J* = 7.5 Hz, 2H), 6.70–6.60 (m, 1H), 4.40–4.23 (m, 2H), 3.79–3.68 (m, 1H), 3.62–3.51 (m, 1H), 3.20–3.04 (m, 3H), 3.04–2.85 (m, 3H). <sup>13</sup>C NMR (150 MHz, DMSO-*d*<sub>6</sub>) δ = 170.20, 163.48, 163.45, 148.77, 148.76, 138.16, 136.49, 136.47, 134.46, 127.81, 126.90, 126.88, 125.70, 125.65, 122.16, 122.03, 122.01, 121.87, 121.71, 119.66, 119.60, 116.94, 116.91, 64.30, 63.54, 44.41, 44.28, 40.54, 40.09, 40.04, 28.28, 14.01, 13.87. HRMS (ESI-TOF) Calcd for C<sub>32</sub>H<sub>28</sub>N<sub>5</sub>O<sub>2</sub><sup>+</sup> [M+H]<sup>+</sup> calc: 514.22375, found 514.22694. X-ray (single-crystal) Colorless needle crystals of X-ray diffraction quality were obtained by vapor diffusion of hexane into a saturated solution of **3bn** in DCM (CCDC 2033387).<sup>16</sup>

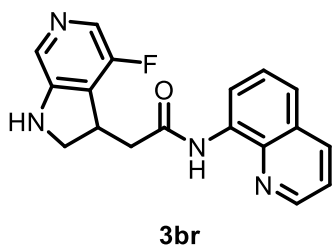

**2-(4-fluoro-2,3-dihydro-1H-pyrrolo[2,3-c]pyridin-3-yl)-N-(quinolin-8-yl)acetamide (3br):** To an 8-mL scintillation vial equipped with a Teflon-coated magnetic stir bar were added the Pd(OAc)<sub>2</sub> (12.7 mg, 0.057 mmol, 20 mol%), alkene substrate **1a** (60 mg, 0.28 mmol), 5-fluoro-4-iodopyridin-3-amine (80.7 mg, 0.34 mmol, 1.2 equiv), K<sub>2</sub>CO<sub>3</sub> (39.1 mg, 0.28 mmol, 1 equiv), and HFIP (0.57 mL). The vial was sealed with a screw-top septum cap and placed in a heating block that was pre-heated to 100 °C. The reaction was allowed to run for 24 h and then was cooled to room temperature. The reaction mixture was then filtered through an autovial syringeless filter device, and concentrated to afford a brown residue, which, upon purification by reverse phase HPLC, afforded pure product as a yellow film (45 mg, 49% yield). <sup>1</sup>H NMR (400 MHz, DMSO-*d*<sub>6</sub>) δ 10.21 (s, 1H), 8.92 (dd, *J* = 4.2, 1.7 Hz, 1H), 8.62 (dd, *J* = 7.7, 1.4 Hz, 1H), 8.40 (dd, *J* = 8.3, 1.7 Hz, 1H), 7.72–7.65 (m, 3H), 7.65–7.54 (m, 2H), 6.15–6.07 (m, 1H), 4.03–3.91 (m, 1H), 3.76 (td, *J* = 9.5, 1.5 Hz, 1H), 3.38 (ddd, *J* = 9.6, 6.5, 1.7 Hz, 1H), 3.09 (dd, *J* = 15.4, 4.9 Hz, 1H), 2.96 (dd, *J* = 15.4, 9.2 Hz, 1H). <sup>13</sup>C NMR (100 MHz, DMSO) δ 169.57, 157.86, 155.34, 151.49 (d, *J* = 6.0 Hz), 148.81, 138.22, 136.50, 134.46, 127.82, 126.87, 126.64, 126.61, 126.24, 126.01, 124.26, 124.09, 122.05, 121.99, 117.09, 52.47, 36.27. HRMS (ESI-TOF) Calcd for C<sub>18</sub>H<sub>15</sub>FN<sub>4</sub>ONa<sup>+</sup> [M+Na]<sup>+</sup> calc: 345.1122, found 345.1117.

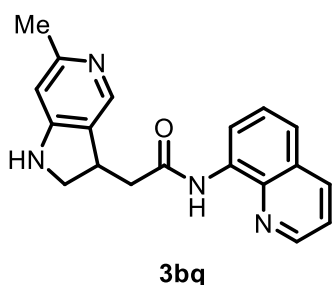

**2-(6-methyl-2,3-dihydro-1H-pyrrolo[3,2-c]pyridin-3-yl)-N-(quinolin-8-yl)acetamide (3bq):** To an 8-mL scintillation vial equipped with a Teflon-coated magnetic stir bar were added the Pd(OAc)<sub>2</sub> (21.2 mg, 0.094 mmol, 20 mol%), alkene substrate **1a** (100 mg, 0.47 mmol), 3-iodopyridin-4-amine (124 mg, 0.57 mmol, 1.2 equiv), K<sub>2</sub>CO<sub>3</sub> (65.1 mg, 0.47 mmol, 1 equiv), and HFIP (0.94 mL). The vial was sealed with a screw-top septum cap and placed in a heating block that was pre-heated to 100 °C. The reaction was allowed to run for 24 h and then was cooled to room temperature. The reaction mixture was then filtered through an autovial syringeless filter device, and concentrated to afford a brown residue, which, upon purification by reverse phase HPLC, afforded pure product as a colorless oil (90 mg, 56% yield). <sup>1</sup>H NMR (400 MHz, DMSO-*d*<sub>6</sub>) δ 10.18 (s, 1H), 8.92 (dd, *J* = 4.2, 1.7 Hz, 1H), 8.64 (dd, *J* = 7.7, 1.4 Hz, 1H), 8.41 (dd, *J* = 8.3, 1.7 Hz, 1H), 7.91 (s, 1H), 7.71–7.55 (m, 3H), 6.81 (s, 1H), 6.32 (s, 1H), 3.85–3.70 (m, 2H), 3.43–3.35 (m, 1H), 3.11–3.01 (m, 1H), 2.87 (dd, *J* = 15.2, 7.9 Hz, 1H), 2.26 (s, 3H). <sup>13</sup>C NMR (100 MHz, DMSO) δ 170.25, 158.54, 156.12, 148.81, 141.73, 138.18, 136.53, 134.46, 127.85, 126.92, 125.06, 122.07, 121.95, 116.97, 102.00, 52.31, 41.75, 35.57, 23.54. HRMS (ESI-TOF) Calcd for C<sub>19</sub>H<sub>19</sub>N<sub>4</sub>O<sup>+</sup> [M+H]<sup>+</sup> calc: 319.1153, found 319.1564.

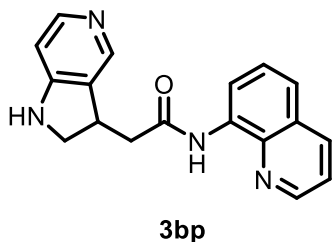

**2-(2,3-dihydro-1H-pyrrolo[3,2-c]pyridin-3-yl)-N-(quinolin-8-yl)acetamide (3bp):** To an 8-mL scintillation vial equipped with a Teflon-coated magnetic stir bar were added the Pd(OAc)<sub>2</sub> (10.6 mg, 0.047 mmol, 20 mol%), alkene substrate **1a** (50 mg, 0.24 mmol), 4-iodo-1-methyl-1H-pyrazol-3-amine (63 mg, 0.28 mmol, 1.2 equiv), K<sub>2</sub>CO<sub>3</sub> (32.6 mg, 0.24 mmol, 1 equiv), and HFIP (0.47 mL). The vial was sealed with a screw-top septum cap and placed in a heating block that was pre-heated to 100 °C. The reaction was allowed to run for 24 h and then was cooled to room temperature. The reaction mixture was then filtered through an autovial syringeless filter

device, and concentrated to afford a brown residue, which, upon purification by reverse phase HPLC, afforded pure product as a colorless oil (46 mg, 63% yield). **<sup>1</sup>H NMR** (400 MHz, DMSO-*d*<sub>6</sub>) δ 10.19 (s, 1H), 8.91 (dd, *J* = 4.2, 1.7 Hz, 1H), 8.66 (dd, *J* = 7.6, 1.4 Hz, 1H), 8.40 (dd, *J* = 8.3, 1.7 Hz, 1H), 7.68 (dd, *J* = 8.3, 1.3 Hz, 1H), 7.65–7.56 (m, 2H), 6.52 (d, *J* = 29.5 Hz, 2H), 3.87–3.69 (m, 2H), 3.35 (q, *J* = 4.7 Hz, 1H), 3.10 (dd, *J* = 15.4, 5.5 Hz, 1H), 2.94–2.79 (m, 1H), 2.00–1.83 (m, 2H). **<sup>13</sup>C NMR** (100 MHz, DMSO) δ 170.23, 157.62, 148.81, 148.16, 143.16, 138.19, 136.53, 134.46, 127.85, 126.92, 122.06, 121.96, 116.98, 52.11, 41.65, 36.04. **HRMS (ESI-TOF)** Calcd for C<sub>18</sub>H<sub>17</sub>N<sub>4</sub>O<sup>+</sup> [M+H]<sup>+</sup> calc: 305.1397, found 305.1411.

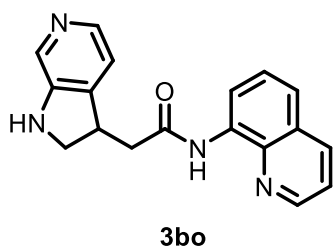

**2-(2,3-dihydro-1H-pyrrolo[2,3-c]pyridin-3-yl)-N-(quinolin-8-yl)acetamide (3bo):** To an 8-mL scintillation vial equipped with a Teflon-coated magnetic stir bar were added the Pd(OAc)<sub>2</sub> (10.6 mg, 0.047 mmol, 20 mol%), alkene substrate **1a** (50 mg, 0.24 mmol), 4-iodopyridin-3-amine (62.2 mg, 0.28 mmol, 1.2 equiv), K<sub>2</sub>CO<sub>3</sub> (32.6 mg, 0.24 mmol, 1 equiv), and HFIP (0.47 mL). The vial was sealed with a screw-top septum cap and placed in a heating block that was pre-heated to 80 °C. The reaction was allowed to run for 24 h and then

was cooled to room temperature. The reaction mixture was then filtered through an autovial syringeless filter device, and concentrated to afford a brown residue, which, upon purification by ISCO automated silica gel column chromatography using an eluent system of 0–60% EtOAc/heptane, afforded pure product as a colorless oil 61 mg, 85% yield). **<sup>1</sup>H NMR** (400 MHz, Chloroform-*d*) δ 9.82 (s, 1H), 8.79–8.71 (m, 2H), 8.15 (dd, *J* = 8.3, 1.7 Hz, 1H), 8.04–7.95 (m, 2H), 7.57–7.47 (m, 2H), 7.44 (dd, *J* = 8.3, 4.2 Hz, 1H), 7.11 (dt, *J* = 4.8, 1.0 Hz, 1H), 4.03–3.93 (m, 1H), 3.89 (t, *J* = 9.1 Hz, 1H), 3.42 (dd, *J* = 9.1, 6.3 Hz, 1H), 2.98 (dd, *J* = 15.3, 6.0 Hz, 1H), 2.85 (dd, *J* = 15.3, 8.4 Hz, 1H). **<sup>13</sup>C NMR** (100 MHz, CDCl<sub>3</sub>) δ 169.26, 148.20, 147.92, 140.58, 140.12, 138.23, 136.35, 134.14, 131.38, 127.92, 127.31, 121.75, 121.66, 119.29, 116.53, 52.87, 41.78, 38.50. **HRMS (ESI-TOF)** Calcd for C<sub>18</sub>H<sub>17</sub>N<sub>4</sub>O<sup>+</sup> [M+H]<sup>+</sup> calc: 305.1397, found 305.1406.

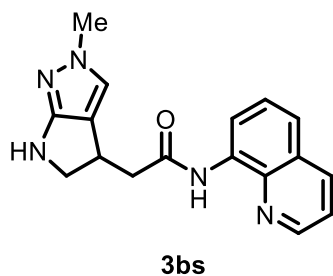

**2-(2-methyl-2,4,5,6-tetrahydropyrrolo[2,3-c]pyrazol-4-yl)-N-(quinolin-8-yl)acetamide (3bs):** To an 8-mL scintillation vial equipped with a Teflon-coated magnetic stir bar were added the Pd(OAc)<sub>2</sub> (10.6 mg, 0.047 mmol, 20 mol%), alkene substrate **1a** (50 mg, 0.24 mmol), 4-iodo-1-methyl-1H-pyrazol-3-amine (63 mg, 0.28 mmol, 1.2 equiv), K<sub>2</sub>CO<sub>3</sub> (32.6 mg, 0.24 mmol, 1 equiv), and HFIP (0.47 mL). The vial was sealed with a screw-top septum cap and placed in a heating block that was pre-heated to 100 °C. The reaction

was allowed to run for 24 h and then was cooled to room temperature. The reaction mixture was then filtered through an autovial syringeless filter device, and concentrated to afford a brown residue, which, upon purification by ISCO automated silica gel column chromatography using an eluent system of 0–10% 7N NH<sub>3</sub> in MeOH/DCM, afforded pure product as a colorless oil (60 mg, 83% yield). **<sup>1</sup>H NMR** (400 MHz, Chloroform-*d*) δ 9.77 (s, 1H), 8.80–8.73 (m, 2H), 8.15 (dd, *J* = 8.3, 1.7 Hz, 1H), 7.58–7.47 (m, 2H), 7.44 (dd, *J* = 8.3, 4.2 Hz, 1H), 6.88 (d, *J* = 0.7 Hz, 1H), 4.08 (dd, *J* = 9.6, 8.4 Hz, 1H), 3.86–3.76 (m, 1H), 3.63 (s, 3H), 3.61–3.55 (m, 1H), 2.87–2.71 (m, 2H). **<sup>13</sup>C NMR** (100 MHz, CDCl<sub>3</sub>) δ 170.10, 165.51, 148.17, 138.31, 136.38, 134.38, 127.97, 127.38, 125.62, 121.67, 121.61, 116.51, 113.01, 58.58, 43.46, 38.63, 33.94. **HRMS (ESI-TOF)** Calcd for C<sub>17</sub>H<sub>18</sub>N<sub>5</sub>O<sup>+</sup> [M+H]<sup>+</sup> calc: 308.1506, found 308.1502

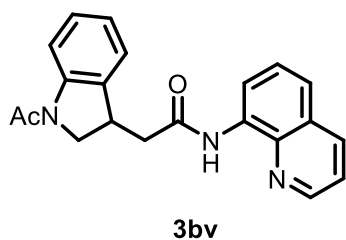

**2-(1-acetyllindolin-3-yl)-N-(quinolin-8-yl)acetamide (3bv):** To a 4-mL scintillation vial equipped with a Teflon-coated magnetic stir bar were added the Pd(OAc)<sub>2</sub> (1.1 mg, 0.005 mmol, 5 mol%), alkene substrate **1a** (21.2 mg, 0.1 mmol), *N*-(2-iodophenyl)acetamide (31.3 mg, 0.12 mmol, 1.2 equiv), KHCO<sub>3</sub> (10.0 mg, 0.1 mmol, 1 equiv), and HFIP (0.05 mL). The vial was sealed with a screw-top septum cap and placed in a heating block that was pre-heated to 80°C. The

reaction was allowed to run for 24 h and then was cooled to room temperature. The reaction mixture was then filtered through a short plug of Celite, and concentrated to afford a brown residue, which, upon purification by preparative TLC with 1:1 hexanes:EtOAc as the eluent, afforded pure product as a yellow solid (24.8 mg, 72% yield). <sup>1</sup>H NMR (600 MHz, CDCl<sub>3</sub>) δ 9.87 (s, 1H), 8.82–8.75 (m, 2H), 8.24 (d, *J* = 8.0 Hz, 1H), 8.18 (dd, *J* = 8.2, 1.7 Hz, 1H), 7.60–7.52 (m, 2H), 7.47 (dd, *J* = 8.3, 4.2 Hz, 1H), 7.25–7.21 (m, 2H), 7.06–7.02 (m, 1H), 4.42 (dd, *J* = 10.9, 9.4 Hz, 1H), 4.07 (tt, *J* = 9.9, 5.2 Hz, 1H), 3.91 (dd, *J* = 10.8, 5.8 Hz, 1H), 3.12 (dd, *J* = 15.6, 4.7 Hz, 1H), 2.85 (dd, *J* = 15.6, 10.2 Hz, 1H), 2.24 (s, 3H). <sup>13</sup>C NMR (150 MHz, CDCl<sub>3</sub>) δ 169.48, 169.00, 148.44, 142.85, 138.41, 136.58, 134.24, 133.58, 128.51, 128.12, 127.50, 123.93, 123.87, 122.05, 121.92, 117.30, 116.69, 55.42, 43.59, 37.06, 24.46. HRMS (ESI-TOF) Calcd for C<sub>21</sub>H<sub>20</sub>N<sub>3</sub>O<sub>2</sub><sup>+</sup> [M+H]<sup>+</sup> 346.1556, found 346.1553.

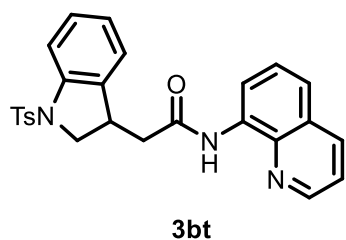

***N*-(quinolin-8-yl)-2-(1-tosylindolin-3-yl)acetamide (3bt):** To a 4-mL scintillation vial equipped with a Teflon-coated magnetic stir bar were added the Pd(OAc)<sub>2</sub> (1.1 mg, 0.005 mmol, 5 mol%), alkene substrate **1a** (21.2 mg, 0.1 mmol), *N*-(2-iodophenyl)-4-methylbenzenesulfonamide (44.8 mg, 0.12 mmol, 1.2 equiv), K<sub>2</sub>CO<sub>3</sub> (13.8 mg, 0.1 mmol, 1 equiv), and HFIP (0.1 mL). The vial was sealed with a screw-top septum cap and placed in a heating block that

was pre-heated to 80 °C. The reaction was allowed to run for 24 h and then was cooled to room temperature. The reaction mixture was then filtered through a short plug of Celite, and concentrated to afford a brown residue, which, upon purification by preparative TLC, with 1:1 hexanes:EtOAc as the eluent, afforded pure product as a white solid (45.8 mg, >99% yield). <sup>1</sup>H NMR (600 MHz, CDCl<sub>3</sub>) δ 9.64 (s, 1H), 8.79 (dd, *J* = 4.2, 1.7 Hz, 1H), 8.77 (s, 1H), 8.18 (dd, *J* = 8.3, 1.7 Hz, 1H), 7.72–7.67 (m, 3H), 7.59–7.51 (m, 2H), 7.47 (dd, *J* = 8.3, 4.2 Hz, 1H), 7.26–7.21 (m, 3H), 7.16–7.13 (m, 1H), 6.99 (td, *J* = 7.5, 1.0 Hz, 1H), 4.21–4.14 (m, 1H), 3.84–3.75 (m, 2H), 2.72–2.65 (m, 1H), 2.38 (s, 3H), 2.37–2.33 (m, 1H). <sup>13</sup>C NMR (150 MHz, CDCl<sub>3</sub>) δ 169.05, 148.32, 144.34, 141.90, 138.36, 136.59, 134.46, 134.06, 129.87, 128.60, 128.10, 127.51, 124.72, 124.18, 121.99, 121.87, 116.72, 115.54, 55.84, 43.25, 36.88, 21.70. HRMS (ESI-TOF) Calcd for C<sub>26</sub>H<sub>24</sub>N<sub>3</sub>O<sub>3</sub>S<sup>+</sup> [M+H]<sup>+</sup> 458.1538, found 458.1537.

**2-(5-methoxy-1-tosylindolin-3-yl)-N-(quinolin-8-yl)acetamide (3bu):** To a 4-mL scintillation vial equipped with a Teflon-coated magnetic stir bar were added the Pd(OAc)<sub>2</sub> (1.1 mg, 0.005 mmol, 5 mol%), alkene substrate **1a** (21.2 mg, 0.1 mmol), *N*-(2-iodo-4-methoxyphenyl)-4-methylbenzenesulfonamide (48.3 mg, 0.12 mmol, 1.2 equiv), K<sub>2</sub>CO<sub>3</sub> (13.8 mg, 0.1 mmol, 1 equiv), and HFIP (0.1 mL). The vial was sealed with a screw-top septum cap and placed in a heating block that was pre-heated to 80 °C. The reaction was allowed to run for 24 h and then was cooled to room temperature. The reaction mixture was then filtered through a short plug of Celite, and concentrated to afford a brown residue, which, upon purification by preparative TLC, with 1:1

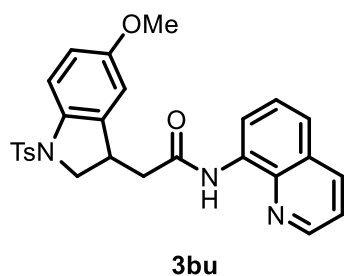

hexanes:EtOAc as the eluent, afforded pure product as a white solid (48.8 mg, >99% yield). **<sup>1</sup>H NMR** (600 MHz, CDCl<sub>3</sub>) δ 9.58 (s, 1H), 8.80 (dd, *J* = 4.2, 1.7 Hz, 1H), 8.74 (dd, *J* = 6.7, 2.3 Hz, 1H), 8.18 (dd, *J* = 8.3, 1.7 Hz, 1H), 7.67–7.64 (m, 2H), 7.62 (d, *J* = 8.8 Hz, 1H), 7.58–7.51 (m, 2H), 7.48 (dd, *J* = 8.3, 4.2 Hz, 1H), 7.25–7.24 (m, 2H), 6.78 (ddd, *J* = 8.8, 2.7, 0.7 Hz, 1H), 6.68 (dd, *J* = 2.6, 0.9 Hz, 1H), 4.18 (dd, *J* = 11.7, 8.9 Hz, 1H), 3.81–3.75 (m, 1H), 3.69 (m, 4H), 2.56 (dd, *J* = 15.4, 5.6 Hz, 1H), 2.40 (s, 3H), 2.21 (dd, *J* = 15.4, 9.2 Hz, 1H). **<sup>13</sup>C NMR** (150 MHz, CDCl<sub>3</sub>) δ 168.99, 157.15, 148.32, 144.24, 138.38, 136.62, 136.40, 135.30, 134.21, 133.96, 129.85, 128.12, 127.61, 127.53, 122.02, 121.89, 117.15, 116.75, 113.88, 110.35, 56.17, 55.72, 43.14, 37.28, 21.73. **HRMS (ESI-TOF)** Calcd for C<sub>27</sub>H<sub>26</sub>N<sub>3</sub>O<sub>4</sub>S<sup>+</sup> [M+H]<sup>+</sup> 488.1644, found 488.1638.

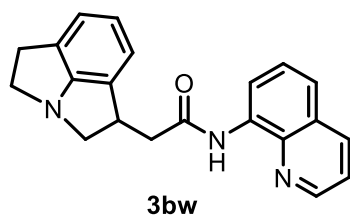

***N*-(quinolin-8-yl)-2-(1,2,4,5-tetrahydropyrrolo[3,2,1-hi]indol-1-yl)acetamide (3bw)**: To a 4-mL scintillation vial equipped with a Teflon-coated magnetic stir bar were added the Pd(OAc)<sub>2</sub> (2.6 mg, 0.0118 mmol, 5 mol%), alkene substrate **1a** (50 mg, 0.24 mmol), 7-bromoindoline (56 mg, 0.28 mmol, 1.2 equiv), K<sub>2</sub>CO<sub>3</sub> (32.6 mg, 0.236 mmol, 1 equiv), and HFIP (0.48 mL). The vial was sealed with a screw-top septum cap and placed in a heating block that was pre-heated to 80 °C. The reaction was allowed to run for 24 h and then was cooled to room temperature. The reaction mixture was then filtered through an autovial syringeless filter device, and concentrated to afford a brown residue, which, upon purification by ISCO automated silica gel column chromatography using an eluent system of 0–100% EtOAc/heptane, afforded pure product as a light brown film (70 mg, 90% yield). **<sup>1</sup>H NMR** (400 MHz, CDCl<sub>3</sub>) δ = 9.88 (br s, 1H), 8.83 (dd, *J* = 1.5, 7.3 Hz, 1H), 8.78 (dd, *J* = 1.7, 4.2 Hz, 1H), 8.17 (dd, *J* = 1.7, 8.3 Hz, 1H), 7.60–7.50 (m, 2H), 7.45 (dd, *J* = 4.2, 8.3 Hz, 1H), 7.02–6.94 (m, 2H), 6.65 (t, *J* = 7.3 Hz, 1H), 4.30 (quin, *J* = 7.3 Hz, 1H), 3.61 (dd, *J* = 7.3, 8.7 Hz, 1H), 3.37–3.15 (m, 4H), 3.12–3.01 (m, 2H), 2.92 (dd, *J* = 8.1, 15.0 Hz, 1H). **<sup>13</sup>C NMR** (100 MHz, CDCl<sub>3</sub>) δ = 169.87, 163.97, 148.13, 138.32, 136.29, 134.38, 127.92, 127.37, 125.35, 123.48, 122.75, 121.67, 121.59, 121.54, 120.32, 116.51, 64.44, 58.68, 45.06, 41.77, 34.74. **HRMS (ESI-TOF)** Calcd for C<sub>21</sub>H<sub>20</sub>N<sub>3</sub>O<sup>+</sup> [M+H]<sup>+</sup> 330.16009, found 330.16201.

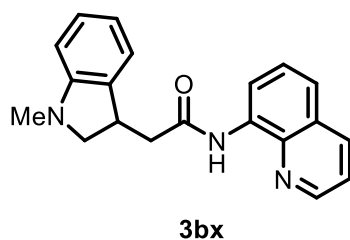

**2-(1-methylindolin-3-yl)-*N*-(quinolin-8-yl)acetamide (3bx)**: To a 4-mL scintillation vial equipped with a Teflon-coated magnetic stir bar were added the Pd(OAc)<sub>2</sub> (2.2 mg, 0.01 equiv, 10 mol%), alkene substrate **1a** (21.2 mg, 0.1 mmol), 2-iodo-*N*-methylaniline (28.0 mg, 0.12 mmol, 1.2 equiv), K<sub>2</sub>CO<sub>3</sub> (13.8 mg, 0.1 mmol, 1 equiv), and HFIP (0.1 mL). The vial was sealed with a screw-top septum cap and placed in a heating block that was pre-heated to 80 °C. The reaction was allowed to run for 24 h and then was cooled to room temperature. The reaction mixture was then filtered through a short plug of Celite, and concentrated to afford a brown residue, which, upon purification by preparative TLC, with 1:1 hexanes:EtOAc as the eluent, afforded pure product as a yellow oil (15.9 mg, 50% yield). **<sup>1</sup>H NMR** (600 MHz, CDCl<sub>3</sub>) δ 9.85 (s, 1H), 8.85–8.79 (m, 1H), 8.79–8.73 (m, 1H), 8.19–8.14 (m, 1H), 7.60–7.54 (m, 1H), 7.53 (d, *J* = 1.5 Hz, 1H), 7.45 (dd, *J* = 8.2, 4.2 Hz, 1H), 7.23–7.09 (m, 2H), 6.68 (td, *J* = 7.4, 1.0 Hz, 1H), 6.52 (d, *J* = 7.8 Hz, 1H), 3.90–3.83 (m, 1H), 3.62 (dd, *J* = 9.0, 8.4 Hz, 1H), 3.19 (dd, *J* = 9.0, 6.3 Hz, 1H), 3.00 (dd, *J* = 15.1, 5.8 Hz, 1H), 2.83 (dd, *J* = 15.1, 9.1 Hz, 1H), 2.77 (s, 3H). **<sup>13</sup>C NMR** (150 MHz,

CDCl<sub>3</sub>) δ 170.32, 153.14, 148.32, 138.47, 136.49, 134.54, 132.59, 128.22, 128.09, 127.56, 123.86, 121.79, 121.72, 118.08, 116.65, 107.52, 62.06, 42.61, 37.75, 36.07. **HRMS (ESI-TOF)** Calcd for C<sub>20</sub>H<sub>20</sub>N<sub>3</sub>O<sup>+</sup> [M+H]<sup>+</sup> 318.1606, found 318.1602.

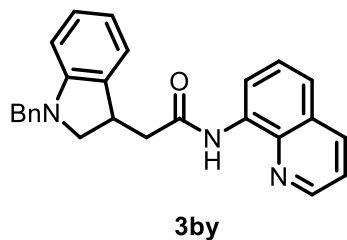

**2-(1-benzylindolin-3-yl)-N-(quinolin-8-yl)acetamide (3by):** To a 4-mL scintillation vial equipped with a Teflon-coated magnetic stir bar were added the Pd(OAc)<sub>2</sub> (2.2 mg, 0.01 equiv, 10 mol%), alkene substrate **1a** (21.2 mg, 0.1 mmol), N-benzyl-2-iodoaniline (37.1 mg, 0.12 mmol, 1.2 equiv), K<sub>2</sub>CO<sub>3</sub> (13.8 mg, 0.1 mmol, 1 equiv), and HFIP (0.1 mL). The vial was sealed with a screw-top septum cap and placed in a heating block that was pre-heated to 80 °C. The reaction

was allowed to run for 24 h and then was cooled to room temperature. The reaction mixture was then filtered through a short plug of Celite, and concentrated to afford a brown residue, which, upon purification by preparative TLC, with 1:1 hexanes:EtOAc as the eluent, afforded pure product as a yellow oil (22.8 mg, 58% yield). **<sup>1</sup>H NMR** (600 MHz, CDCl<sub>3</sub>) δ 9.82 (s, 1H), 8.82–8.75 (m, 2H), 8.16 (dd, *J* = 8.2, 1.7 Hz, 1H), 7.54 (s, 1H), 7.52 (d, *J* = 1.5 Hz, 1H), 7.45 (dd, *J* = 8.2, 4.2 Hz, 1H), 7.38–7.34 (m, 2H), 7.32–7.28 (m, 2H), 7.26–7.22 (m, 1H), 7.17 (dd, *J* = 7.4, 1.3 Hz, 1H), 7.12–7.07 (m, 1H), 6.68 (td, *J* = 7.4, 0.9 Hz, 1H), 6.54 (d, *J* = 7.9 Hz, 1H), 4.35–4.21 (m, 2H), 3.95–3.87 (m, 1H), 3.68 (t, *J* = 8.9 Hz, 1H), 3.19 (dd, *J* = 9.1, 6.5 Hz, 1H), 3.03 (dd, *J* = 15.2, 5.8 Hz, 1H), 2.82 (dd, *J* = 15.1, 8.9 Hz, 1H). **<sup>13</sup>C NMR** (150 MHz, CDCl<sub>3</sub>) δ 170.22, 152.29, 148.30, 138.45, 138.36, 136.49, 134.50, 132.30, 128.65, 128.21, 128.08, 128.00, 127.55, 127.28, 124.07, 121.77, 121.71, 118.00, 116.63, 107.38, 59.71, 53.39, 42.87, 37.59. **HRMS (ESI-TOF)** Calcd for C<sub>26</sub>H<sub>24</sub>N<sub>3</sub>O<sup>+</sup> [M+H]<sup>+</sup> 394.1919, found 394.1913.

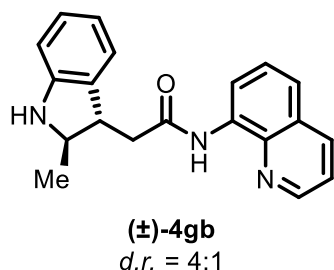

**2-(2-methylindolin-3-yl)-N-(quinolin-8-yl)acetamide ((±)-4gb):** The title compound was prepared from **1g** (22.6 mg, 0.1 mmol) and 2-iodoaniline (26.3 mg, 0.12 mmol) according to the General Procedure B. Purification using preparative TLC with 1:1 hexanes:EtOAc as the eluent gave the product as a yellow solid (23.5 mg, 74% yield). The reported *d.r.* was determined by <sup>1</sup>H NMR analysis of purified (±)-**4gb** and is consistent with that of the crude reaction mixture. The following analytical data correspond to the major diastereomer. **<sup>1</sup>H NMR** (600

MHz, CDCl<sub>3</sub>) δ 9.85 (s, 1H), 8.83 (dd, *J* = 7.5, 1.5 Hz, 1H), 8.76 (dd, *J* = 4.2, 1.7 Hz, 1H), 8.16 (dd, *J* = 8.2, 1.7 Hz, 1H), 7.56 (t, *J* = 7.9 Hz, 1H), 7.52 (dd, *J* = 8.3, 1.4 Hz, 1H), 7.45 (dd, *J* = 8.2, 4.2 Hz, 1H), 7.16 (dd, *J* = 7.4, 1.3 Hz, 1H), 7.04 (tt, *J* = 7.7, 1.0 Hz, 1H), 6.69 (td, *J* = 7.4, 1.0 Hz, 1H), 6.63 (d, *J* = 7.8 Hz, 1H), 3.80 (br, 1H), 3.77 (p, *J* = 6.2 Hz, 1H), 3.55 (q, *J* = 6.7 Hz, 1H), 2.92 (dd, *J* = 15.0, 6.6 Hz, 1H), 2.83 (dd, *J* = 15.0, 7.8 Hz, 1H), 1.33 (d, *J* = 6.2 Hz, 3H). **<sup>13</sup>C NMR** (150 MHz, CDCl<sub>3</sub>) δ 170.18, 150.18, 148.32, 138.48, 136.48, 134.52, 131.12, 128.10, 127.56, 124.62, 121.78, 121.73, 118.93, 116.67, 109.59, 60.98, 46.40, 42.92, 21.99. **HRMS (ESI-TOF)** Calcd for C<sub>20</sub>H<sub>20</sub>N<sub>3</sub>O<sup>+</sup> [M+H]<sup>+</sup> 318.1606, found 318.1611.

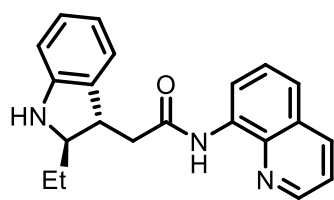

(±)-4hb  
d.r. > 20:1

**2-(2-Ethylindolin-3-yl)-N-(quinolin-8-yl)acetamide ((±)-4hb):** The title compound was prepared from **1h** and 2-iodoaniline (26.3 mg, 0.12 mmol) according to the General Procedure B. Purification using preparative TLC with 1:1 hexanes:EtOAc as the eluent gave the product as a yellow solid (17.9 mg, 54% yield). <sup>1</sup>H NMR (600 MHz, CDCl<sub>3</sub>) δ 9.83 (s, 1H), 8.83 (dd, *J* = 7.6, 1.4 Hz, 1H), 8.76 (dd, *J* = 4.2, 1.7 Hz, 1H), 8.16 (dd, *J* = 8.2, 1.7 Hz, 1H), 7.56 (t, *J* = 7.9 Hz, 1H), 7.52 (dd, *J* = 8.3, 1.4 Hz, 1H), 7.44 (dd, *J* = 8.2, 4.2 Hz, 1H), 7.18–7.14 (m, 1H), 7.06–7.00 (m, 1H), 6.67 (td, *J* = 7.4, 1.0 Hz, 1H), 6.63 (d, *J* = 7.8 Hz, 1H), 3.91 (br, 1H), 3.63 (q, *J* = 6.6 Hz, 1H), 3.56 (dt, *J* = 7.7, 5.2 Hz, 1H), 2.90 (dd, *J* = 14.9, 6.7 Hz, 1H), 2.84 (dd, *J* = 14.9, 7.6 Hz, 1H), 1.75–1.65 (m, 1H), 1.64–1.53 (m, 1H), 0.98 (t, *J* = 7.4 Hz, 3H). <sup>13</sup>C NMR (150 MHz, CDCl<sub>3</sub>) δ 170.18, 150.29, 148.31, 138.49, 136.47, 134.55, 131.20, 128.07, 127.57, 124.65, 121.77, 121.70, 118.75, 116.67, 109.37, 66.77, 44.43, 43.53, 28.96, 10.58. **HRMS (ESI-TOF)** Calcd for C<sub>21</sub>H<sub>22</sub>N<sub>3</sub>O<sup>+</sup> [M+H]<sup>+</sup> 332.1763, found 332.1766.

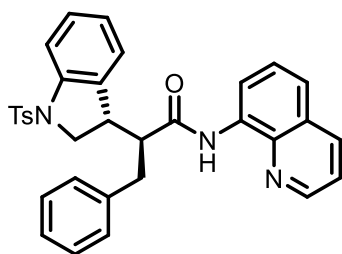

(±)-4cp  
d.r. > 20:1

**3-Phenyl-N-(quinolin-8-yl)-2-(1-tosylindolin-3-yl)propanamide ((±)-4cp):** To a 4-mL scintillation vial equipped with a Teflon-coated magnetic stir bar were added the Pd(OAc)<sub>2</sub> (1.1 mg, 0.005 mmol, 5 mol%), **1c** (30.2 mg, 0.1 mmol, 1 equiv), the appropriate *ortho*-iodoaniline substrate (mg, 0.12 mmol, 1.2 equiv), K<sub>2</sub>CO<sub>3</sub> (13.8 mg, 0.1 mmol, 1 equiv), and HFIP (0.1 mL). The vial was sealed with a screw-top septum cap and placed in a heating block that was pre-heated to 80°C. The reaction was allowed to run for 24 h and then was cooled to room temperature. The reaction mixture was then filtered through a short plug of Celite, and concentrated to afford a brown residue, which, upon purification by preparative TLC, with 1:1 hexanes:EtOAc as the eluent, afforded pure product as a white solid (46.5 mg, 85% yield). <sup>1</sup>H NMR (600 MHz, CDCl<sub>3</sub>) δ 9.15 (s, 1H), 8.71 (dd, *J* = 7.4, 1.5 Hz, 1H), 8.61 (dd, *J* = 4.2, 1.6 Hz, 1H), 8.10 (dd, *J* = 8.2, 1.7 Hz, 1H), 7.78–7.71 (m, 3H), 7.54–7.45 (m, 2H), 7.38 (dd, *J* = 8.2, 4.2 Hz, 1H), 7.28–7.27 (m, 2H), 7.20–7.08 (m, 4H), 7.07–7.01 (m, 3H), 6.79 (td, *J* = 7.5, 1.0 Hz, 1H), 4.17–4.05 (m, 2H), 3.69 (td, *J* = 7.9, 5.7 Hz, 1H), 2.89 (dd, *J* = 13.7, 11.1 Hz, 1H), 2.54 (dd, *J* = 13.7, 3.2 Hz, 1H), 2.45 (ddd, *J* = 10.9, 7.6, 3.1 Hz, 1H), 2.31 (s, 3H). <sup>13</sup>C NMR (150 MHz, CDCl<sub>3</sub>) δ 171.02, 147.36, 143.90, 141.73, 138.19, 137.73, 135.69, 133.53, 133.37, 132.05, 129.43, 128.26, 128.24, 127.99, 127.31, 126.87, 126.77, 125.93, 124.80, 123.43, 121.33, 121.06, 116.14, 114.74, 54.40, 52.33, 42.46, 35.05, 21.04. **HRMS (ESI-TOF)** Calcd for C<sub>33</sub>H<sub>30</sub>N<sub>3</sub>O<sub>3</sub>S<sup>+</sup> [M+H]<sup>+</sup> 548.2008, found 548.2014. **X-ray** (single-crystal) Colorless needle crystals of X-ray diffraction quality were obtained by vapor diffusion of hexane into a saturated solution of **4cp** in toluene (CCDC 1999889).<sup>16</sup>

*Note:* The diastereomeric ratios of products **4ca-4fa**, **4hb** and **4cp** were determined directly based on <sup>1</sup>H NMR spectra of the crude reaction mixtures. In these cases, based on our analysis, only a single product diastereomer was detected. Trace impurities were sometimes detected in the <sup>1</sup>H NMR spectra of the crude reaction mixture, but the peaks of these minor byproducts did not appear to correspond to the other potential diastereomer. However, except for the major product, no other compounds were formed in sufficient quantity to be isolated and characterized. Based on this data (namely, that the other potential diastereomers were not observed), we have conservatively reported a lower bound of 20:1 for the diastereomeric ratio in these cases.



### General Procedure C for [3+2] Indane Synthesis

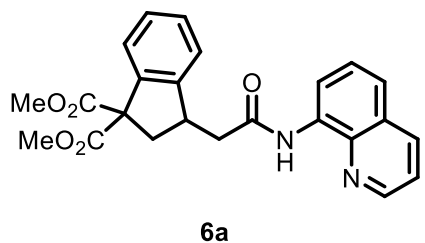

**Dimethyl 3-(2-oxo-2-(quinolin-8-ylamino)ethyl)-2,3-dihydro-1H-indene-1,1-dicarboxylate (6a):** To a 4-mL scintillation vial equipped with a Teflon-coated magnetic stir bar were added the Pd(OAc)<sub>2</sub> (2.2 mg, 0.01 mmol, 10 mol%), alkene substrate **1a** (21.2 mg, 0.1 mmol), the carbon nucleophile (40 mg, 0.12 mmol, 1.2 equiv), K<sub>2</sub>CO<sub>3</sub> (13.8 mg, 0.1 mmol, 1 equiv), and HFIP (0.05 mL). The vial was sealed with a screw-top septum cap and placed in a heating block that was pre-heated to 40 °C. The reaction was allowed to run for 24 h and then was cooled to room temperature. The reaction mixture was then filtered through a short plug of Celite, and concentrated to afford a brown residue, which, upon purification by preparative TLC, afforded pure product as a colorless oil (40.1 mg, 96% yield). <sup>1</sup>H NMR (600 MHz, CDCl<sub>3</sub>) δ 9.90 (s, 1H), 8.83 (dd, *J* = 7.5, 1.5 Hz, 1H), 8.78 (dd, *J* = 4.2, 1.7 Hz, 1H), 8.17 (dd, *J* = 8.2, 1.7 Hz, 1H), 7.66–7.48 (m, 3H), 7.45 (dd, *J* = 8.2, 4.2 Hz, 1H), 7.35–7.28 (m, 3H), 4.02 (tt, *J* = 8.4, 6.4 Hz, 1H), 3.80 (s, 3H), 3.73 (s, 3H), 3.13 (dd, *J* = 13.7, 8.1 Hz, 1H), 3.06 (dd, *J* = 14.9, 5.9 Hz, 1H), 2.79 (dd, *J* = 14.9, 9.0 Hz, 1H), 2.56 (dd, *J* = 13.7, 6.9 Hz, 1H). <sup>13</sup>C NMR (150 MHz, CDCl<sub>3</sub>) δ 171.44, 171.09, 170.13, 148.33, 146.46, 139.00, 138.49, 136.50, 134.54, 129.21, 128.09, 127.57, 127.55, 126.94, 124.04, 121.79, 121.77, 116.73, 64.83, 53.12 (d, *J* = 5.0 Hz), 44.00, 40.57, 39.93. HRMS (ESI-TOF) Calcd for C<sub>24</sub>H<sub>23</sub>N<sub>2</sub>O<sub>5</sub><sup>+</sup> [M+H]<sup>+</sup> 419.1607, found 419.1607.

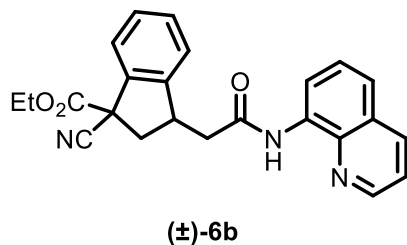

**Ethyl 1-cyano-3-(2-oxo-2-(quinolin-8-ylamino)ethyl)-2,3-dihydro-1H-indene-1-carboxylate ((±)-6b):** To a 4-mL scintillation vial equipped with a Teflon-coated magnetic stir bar were added the Pd(OAc)<sub>2</sub> (2.2 mg, 0.01 mmol, 10 mol%), alkene substrate **1a** (21.2 mg, 0.1 mmol), the carbon nucleophile (37.8 mg, 0.12 mmol, 1.2 equiv), K<sub>2</sub>CO<sub>3</sub> (13.8 mg, 0.1 mmol, 1 equiv), and HFIP (0.05 mL). The vial was sealed with a screw-top septum cap and placed in a heating block that was pre-heated to 40 °C. The reaction was allowed to run for 24 h and then was cooled to room temperature. The reaction mixture was then filtered through a short plug of Celite, and concentrated to afford a brown residue, which, upon purification by preparative TLC, afforded pure product as a colorless oil (34.3 mg, 86% yield). The reported *d.r.* was determined by <sup>1</sup>H NMR analysis of purified (±)-**6b** and is consistent with that of the crude reaction mixture. The following analytical data correspond to the mixture. <sup>1</sup>H NMR δ 9.91 (s, 2.5H), 8.84–8.76 (m, 5H), 8.20–8.15 (m, 2.5H), 7.61–7.50 (m, 7.5H), 7.46 (ddd, *J* = 8.2, 4.2, 2.8 Hz, 2.5H), 7.40–7.36 (m, 5H), 7.36–7.30 (m, 2.5H), 4.39–4.31 (m, 2H), 4.30–4.22 (m, 3H), 4.22–4.11 (m, 2.5H), 3.36 (dd, *J* = 13.4, 7.7 Hz, 1.5H), 3.15 (dd, *J* = 15.2, 6.1 Hz, 1.5H), 3.12–3.02 (m, 2H), 2.96–2.91 (m, 1H), 2.89–2.76 (m, 2.5H), 2.51 (dd, *J* = 13.4, 7.7 Hz, 1.5H), 1.38 (t, *J* = 7.1 Hz, 3H), 1.30 (t, *J* = 7.1 Hz, 4.5H). <sup>13</sup>C NMR (150 MHz, CDCl<sub>3</sub>) δ 169.67, 169.36, 168.07, 167.47, 148.43, 148.36, 145.79, 145.60, 138.48, 138.44, 137.97, 137.80, 136.55, 136.54, 134.43, 134.36, 130.32, 130.23, 128.58, 128.48, 128.11, 128.10, 127.56, 127.52, 124.97, 124.81, 124.77, 124.74, 121.95, 121.91, 121.87, 121.83, 119.83, 119.37, 116.77, 116.73, 63.62, 63.41, 52.22, 51.86, 43.67, 43.34, 42.99, 41.72, 40.37, 40.31, 14.18, 14.09. HRMS (ESI-TOF) Calcd for C<sub>24</sub>H<sub>22</sub>N<sub>3</sub>O<sub>3</sub><sup>+</sup> [M+H]<sup>+</sup> 410.1661, found 410.1660.

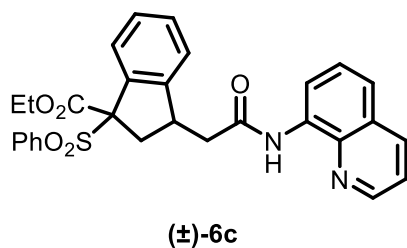

**Ethyl 3-(2-oxo-2-(quinolin-8-ylamino)ethyl)-1-(phenylsulfonyl)-2,3-dihydro-1H-indene-1-carboxylate ((±)-6c):** To a 4-mL scintillation vial equipped with a Teflon-coated magnetic stir bar were added the Pd(OAc)<sub>2</sub> (2.2 mg, 0.01 mmol, 10 mol%), alkene substrate **1a** (21.2 mg, 0.1 mmol), the carbon nucleophile (51.6 mg, 0.12 mmol, 1.2 equiv), K<sub>2</sub>CO<sub>3</sub> (13.8 mg, 0.1 mmol, 1 equiv), and HFIP (0.05 mL). The vial was sealed

with a screw-top septum cap and placed in a heating block that was pre-heated to 60 °C. The reaction was allowed to run for 24 h and then was cooled to room temperature. The reaction mixture was then filtered through a short plug of Celite, and concentrated to afford a brown residue, which, upon purification by preparative TLC, afforded pure product as a colorless oil (31.9 mg, 62% yield). The reported *d.r.* was determined by <sup>1</sup>H NMR analysis of purified (±)-**6c** and is consistent with that of the crude reaction mixture. The following analytical data correspond to the mixture. <sup>1</sup>H NMR (600 MHz, CDCl<sub>3</sub>) δ 9.86 (s, 2.3H), 8.88–8.81 (m, 2H), 8.81–8.71 (m, 2.6H), 8.18 (ddd, *J* = 11.9, 8.3, 1.7 Hz, 2.3H), 7.77–7.72 (m, 2H), 7.69–7.62 (m, 2.3H), 7.62–7.56 (m, 6.9H), 7.56–7.51 (m, 2.6H), 7.50–7.45 (m, 2.3H), 7.45–7.40 (m, 4.6H), 7.38 (tdd, *J* = 7.5, 6.2, 1.2 Hz, 2.3H), 7.33–7.27 (m, 2.6H), 7.27–7.21 (m, 2H), 4.38–4.23 (m, 2.6H), 4.23–4.13 (m, 2H), 4.01 (dp, *J* = 9.7, 4.9 Hz, 1H), 3.70 (qd, *J* = 8.4, 5.6 Hz, 1.3H), 3.43–3.33 (m, 2.6H), 3.06 (dd, *J* = 15.2, 5.6 Hz, 1.3H), 2.94 (dd, *J* = 15.0, 5.6 Hz, 1H), 2.80–2.59 (m, 4.6H), 1.29 (t, *J* = 7.1 Hz, 3.9H), 1.24 (t, *J* = 7.1 Hz, 3H). <sup>13</sup>C NMR (150 MHz, CDCl<sub>3</sub>) δ 170.33, 169.52, 167.03, 166.95, 148.39, 148.34, 148.32, 138.52, 138.43, 136.55, 136.52, 136.23, 135.84, 134.71, 134.53, 134.46, 134.33, 134.24, 131.10, 130.84, 130.58, 130.55, 128.70, 128.61, 128.52, 128.36, 128.12, 128.09, 127.55, 127.54, 127.41, 127.32, 124.46, 124.07, 121.86, 121.84, 121.83, 121.81, 116.74, 83.58, 82.89, 77.37, 77.16, 76.95, 62.99, 62.95, 44.07, 43.76, 39.52, 39.14, 38.77, 36.72. HRMS (ESI-TOF) Calcd for C<sub>29</sub>H<sub>27</sub>N<sub>2</sub>O<sub>5</sub>S<sup>+</sup> [M+H]<sup>+</sup> 515.1641, found 515.1647.

### General Procedure for [3+2] Reactions with NHPA Directing groups

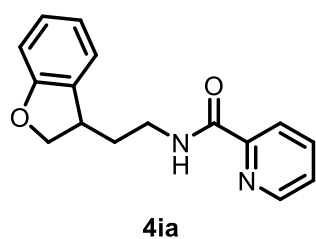

**N-(2-(2,3-Dihydrobenzofuran-3-yl)ethyl)picolinamide (4ia):** To a 4-mL scintillation vial equipped with a Teflon-coated magnetic stir bar were added the Pd(OAc)<sub>2</sub> (2.2 mg, 0.01 mmol, 10 mol%), N-(but-3-en-1-yl)picolinamide (17.6 mg, 0.1 mmol), the 2-iodophenol (26.4 mg, 0.12 mmol, 1.2 equiv), K<sub>2</sub>CO<sub>3</sub> (13.8 mg, 0.1 mmol, 1 equiv), and HFIP (0.1 mL). The vial was sealed with a screw-top septum cap and placed in a heating block that was pre-heated to 80 °C. The reaction was allowed to run for 24 h and then was cooled to room temperature. The

reaction mixture was then filtered through a short plug of Celite, and concentrated to afford a brown residue, which, upon purification by preparative TLC, with 3:1 hexanes:EtOAc as the eluent, afforded pure product as a yellow oil (17.7 mg, 66% yield). <sup>1</sup>H NMR (600 MHz, CDCl<sub>3</sub>) δ 8.55 (ddd, *J* = 4.7, 1.7, 0.9 Hz, 1H), 8.20 (dt, *J* = 7.9, 1.1 Hz, 1H), 8.13 (s, 1H), 7.86 (td, *J* = 7.7, 1.7 Hz, 1H), 7.43 (ddd, *J* = 7.6, 4.8, 1.3 Hz, 1H), 7.25–7.21 (m, 1H), 7.18–7.08 (m, 1H), 6.87 (td, *J* = 7.4, 1.0 Hz, 1H), 6.80 (dd, *J* = 8.0, 0.9 Hz, 1H), 4.69 (t, *J* = 8.8 Hz, 1H), 4.31 (dd, *J* = 8.9, 6.2 Hz, 1H), 3.68–3.49 (m, 3H), 2.16–2.06 (m, 1H), 1.97–1.88 (m, 1H). <sup>13</sup>C NMR (150 MHz, CDCl<sub>3</sub>) δ 164.61, 159.97, 149.92, 148.21, 137.46, 130.26, 128.52, 124.53, 122.29, 120.67, 109.81, 76.79, 39.83, 37.38, 35.05. HRMS (ESI-TOF) Calcd for C<sub>16</sub>H<sub>17</sub>N<sub>2</sub>O<sub>2</sub><sup>+</sup> [M+H]<sup>+</sup> 269.1290, found 269.1295.

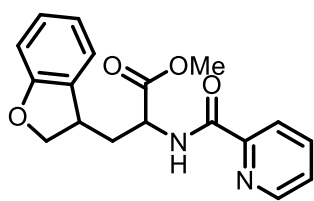

(±)-4ja'  
d.r. = 1.06:1

### Methyl

**3-(2,3-dihydrobenzofuran-3-yl)-2-(picolinamido)propanoate ((±)-4ja')**: To a 4-mL scintillation vial equipped with a Teflon-coated magnetic stir bar were added the Pd(OAc)<sub>2</sub> (4.4 mg, 0.02 equiv, 20 mol%), methyl-2-(picolinamido)pent-4-enoate (23.4 mg, 0.1 mmol), the 2-iodophenol (26.4 mg, 0.12 mmol, 1.2 equiv), K<sub>2</sub>CO<sub>3</sub> (13.8 mg, 0.1 mmol, 1 equiv), and HFIP (0.1 mL). The vial was sealed with a screw-top septum cap and placed in a heating block that was pre-heated to 80 °C. The reaction was allowed to run for 24 h and then was cooled to room temperature.

The reaction mixture was then filtered through a short plug of Celite, and concentrated to afford a brown residue, which, upon purification by preparative TLC, with 1:1 hexanes:EtOAc as the eluent, afforded pure product as a yellow oil (16.3 mg, 50% yield). The reported *d.r.* was determined by <sup>1</sup>H NMR analysis of purified (±)-4ja' and is consistent with that of the crude reaction mixture. The following analytical data correspond to the major diastereomer. The purified sample was diluted with MeCN to approximately 0.1 mg/mL and run on 1D chiral-SFC to determine *ee*. **<sup>1</sup>H NMR** (600 MHz, CDCl<sub>3</sub>) δ 8.67–8.51 (m, 4.12H), 8.23–8.15 (m, 2.06H), 7.87 (tdd, *J* = 7.7, 2.5, 1.7 Hz, 2.06H), 7.47 (ddt, *J* = 7.6, 4.8, 1.3 Hz, 2.06H), 7.35 (dd, *J* = 7.4, 1.3 Hz, 1H), 7.16 (dd, *J* = 7.4, 1.4 Hz, 1.06H), 7.15–7.10 (m, 2.06H), 6.88 (td, *J* = 7.4, 1.0 Hz, 1H), 6.85 (td, *J* = 7.5, 1.0 Hz, 1.06H), 6.79 (s, 1.06H), 6.78 (s, 1H), 5.00 (td, *J* = 8.9, 5.4 Hz, 1H), 4.93 (td, *J* = 8.7, 6.3 Hz, 1.06H), 4.73 (t, *J* = 8.9 Hz, 1.06H), 4.64 (t, *J* = 8.8 Hz, 1H), 4.39 (dd, *J* = 9.1, 6.3 Hz, 1.06H), 4.26 (dd, *J* = 8.9, 6.0 Hz, 1H), 3.78 (d, *J* = 3.5 Hz, 6.18H), 3.62–3.51 (m, 2.06H), 2.46 (ddd, *J* = 14.0, 6.5, 5.4 Hz, 1H), 2.28–2.18 (m, 2.12H), 2.07 (ddd, *J* = 14.0, 8.9, 8.1 Hz, 1H). **<sup>13</sup>C NMR** (150 MHz, CDCl<sub>3</sub>) δ 171.89, 171.82, 163.93, 163.81, 159.37, 159.22, 148.69, 148.65, 147.90, 147.88, 136.98, 129.25, 129.10, 128.14, 128.09, 126.14, 126.13, 124.28, 123.64, 121.96, 120.23, 120.06, 109.26, 109.24, 75.97, 52.22, 52.15, 50.39, 50.21, 38.57, 38.42, 37.91, 37.80. **HRMS (ESI-TOF)** Calcd for C<sub>18</sub>H<sub>19</sub>N<sub>2</sub>O<sub>4</sub><sup>+</sup> [M+H]<sup>+</sup> 327.1345, found 327.1342.

| SAMPLE INFORMATION |                          |                     |                      |
|--------------------|--------------------------|---------------------|----------------------|
| Sample Name:       | NH-444                   | Acquired By:        | System               |
| Sample Type:       | Unknown                  | Sample Set Name:    | Samples_SFC          |
| Vial:              | 1:F,1                    | Acq. Method Set:    | G_ENG0308            |
| Injection #:       | 1                        | Processing Method:  | ENG0308B             |
| Injection Volume:  | 1.00 ul                  | Channel Name:       | PDA Ch1 215nm@12.0nm |
| Run Time:          | 6.0 Minutes              | Proc. Chnl. Descr.: | PDA Ch1 215nm@12.0nm |
| Date Acquired:     | 1/22/2020 9:22:51 AM PST |                     |                      |
| Date Processed:    | 1/22/2020 9:43:50 AM PST |                     |                      |

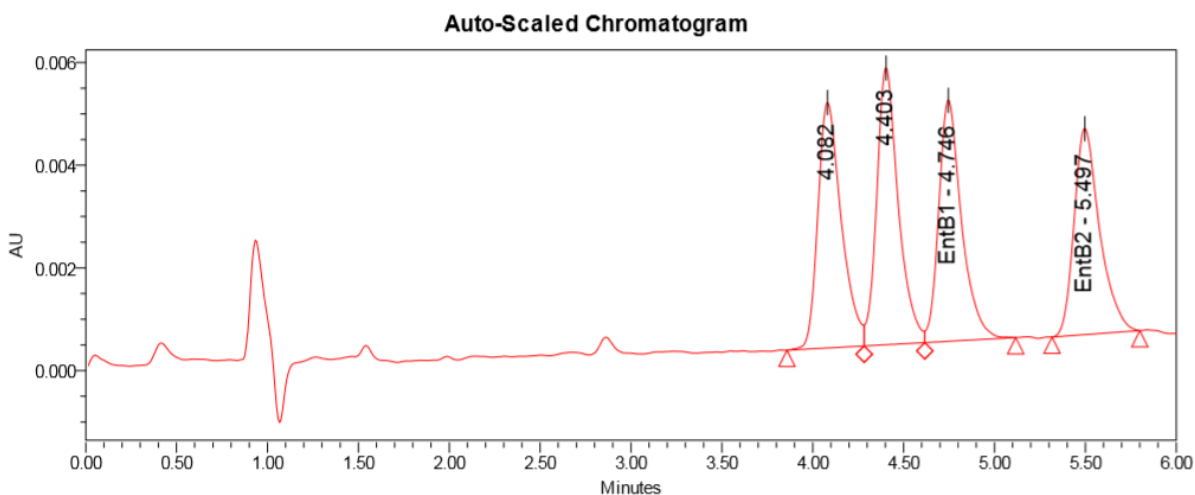

|   | SampleName | ent1   | ent2  | ee     | EntA1  | EntA2 |
|---|------------|--------|-------|--------|--------|-------|
| 1 | NH-444     | 49.02  | 50.98 | -1.96  | 42938  | 44658 |
| 2 | NH-445     | 84.21  | 15.79 | 68.42  | 20456  | 3836  |
| 3 | NH-446     | 100.00 |       | 100.00 | 103890 |       |

**Supplementary Figure 12:** 1D-SFC result for (±)-**4ja**' (NH-444).

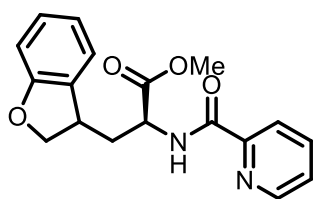

**4ja**  
*d.r.* = 1.6:1

**Methyl (2S)-3-(2,3-dihydrobenzofuran-3-yl)-2-(picolinamido)propanoate ((±)-4ja):** To a 4-mL scintillation vial equipped with a Teflon-coated magnetic stir bar were added the Pd(OAc)<sub>2</sub> (2.2 mg, 0.01 mmol, 10 mol%), methyl (S)-2-(picolinamido)pent-4-enoate (23.4 mg, 0.1 mmol), the 2-iodophenol (26.4 mg, 0.12 mmol, 1.2 equiv), K<sub>2</sub>CO<sub>3</sub> (13.8 mg, 0.1 mmol, 1 equiv), and HFIP (0.1 mL). The vial was sealed with a screw-top septum cap and placed in a heating block that was pre-heated to 40 °C. The reaction

was allowed to run for 24 h and then was cooled to room temperature. The reaction mixture was then filtered through a short plug of Celite, and concentrated to afford a brown residue, which, upon purification by preparative TLC, with 1:1 hexanes:EtOAc, afforded pure product as a yellow oil (19.6 mg, 60% yield). The reported *d.r.* was determined by <sup>1</sup>H NMR analysis of purified (±)-**4ja** and is consistent with that of the crude reaction mixture. The following analytical data correspond to the mixture. The purified sample was diluted with MeCN to approximately 0.1 mg/mL and run on 1D chiral-SFC to determine *ee*. <sup>1</sup>H NMR (500 MHz, CDCl<sub>3</sub>) δ 8.65–8.54 (m, 5.06H), 8.21 (dd, *J* = 12.5, 7.8 Hz, 2.53H), 7.89 (tt, *J* = 7.7, 2.0 Hz, 2.53H), 7.49 (ddt, *J* = 7.7, 4.8, 1.0 Hz, 2.53H), 7.37 (d, *J* = 7.4 Hz, 1H), 7.21–7.11 (m, 4.06H), 6.89 (dt, *J* = 17.2, 7.4 Hz, 2.53H), 6.81 (d, *J* = 8.0 Hz, 2.53H), 5.03 (td, *J* = 8.9, 5.3 Hz, 1H), 4.95 (td, *J* = 8.5, 6.2 Hz, 1.53H), 4.75

(t,  $J = 8.9$  Hz, 1.53H), 4.66 (t,  $J = 8.8$  Hz, 1H), 4.41 (dd,  $J = 9.2, 6.3$  Hz, 1.53H), 4.29 (dd,  $J = 8.9, 6.0$  Hz, 1H), 3.83–3.78 (m, 7.59H), 3.58 (tt,  $J = 15.0, 7.3$  Hz, 2.53H), 2.48 (dt,  $J = 14.1, 5.9$  Hz, 1H), 2.32–2.19 (m, 3.06H), 2.10 (dt,  $J = 13.9, 8.4$  Hz, 1H).  $^{13}\text{C}$  NMR (150 MHz,  $\text{CDCl}_3$ )  $\delta$  171.88, 171.82, 163.94, 163.82, 159.36, 159.22, 148.68, 148.64, 147.90, 147.88, 136.99, 129.24, 129.09, 128.14, 128.09, 126.14, 126.13, 124.28, 123.65, 121.96, 120.23, 120.07, 109.26, 109.24, 75.97, 52.22, 52.15, 50.39, 50.22, 38.57, 38.41, 37.91, 37.79. **HRMS (ESI-TOF)** Calcd for  $\text{C}_{18}\text{H}_{19}\text{N}_2\text{O}_4^+$   $[\text{M}+\text{H}]^+$  327.1345, found 327.1349.

| SAMPLE INFORMATION |                          |                     |                      |
|--------------------|--------------------------|---------------------|----------------------|
| Sample Name:       | NH-446                   | Acquired By:        | System               |
| Sample Type:       | Unknown                  | Sample Set Name     | Samples_SFC          |
| Vial:              | 1:F,3                    | Acq. Method Set:    | G_ENG0308            |
| Injection #:       | 1                        | Processing Method   | ENG0308B             |
| Injection Volume:  | 1.00 ul                  | Channel Name:       | PDA Ch1 215nm@12.0nm |
| Run Time:          | 6.0 Minutes              | Proc. Chnl. Descr.: | PDA Ch1 215nm@12.0nm |
| Date Acquired:     | 1/22/2020 9:36:36 AM PST |                     |                      |
| Date Processed:    | 1/22/2020 9:43:50 AM PST |                     |                      |

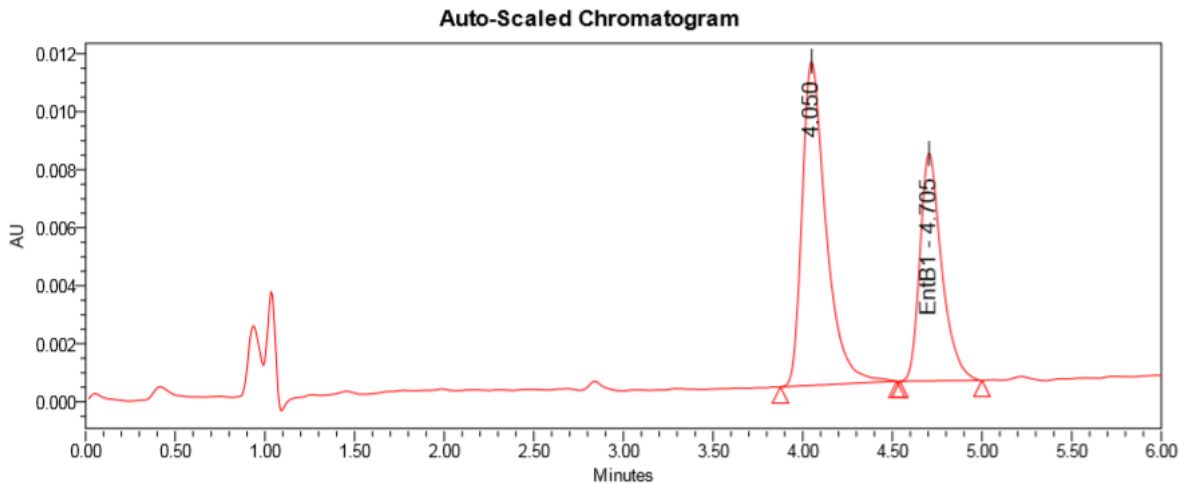

|   | SampleName | ent1   | ent2  | ee     | EntA1  | EntA2 |
|---|------------|--------|-------|--------|--------|-------|
| 1 | NH-444     | 49.02  | 50.98 | -1.96  | 42938  | 44658 |
| 2 | NH-445     | 84.21  | 15.79 | 68.42  | 20456  | 3836  |
| 3 | NH-446     | 100.00 |       | 100.00 | 103890 |       |

**Supplementary Figure 13:** 1D-SFC result for ( $\pm$ )-**4ja** (NH-446).

### *General Procedure E for Deprotection of AQ Directing Group*

To a 4-mL scintillation vial equipped with a Teflon-coated magnetic stir bar were added the  $\text{Ni}(\text{tmhd})_2$  (4.3 mg, 0.01 mmol), 2,3-dihydrobenzofuran or indoline substrate (0.1 mmol) and dry MeOH (1.0 mL) under an argon atmosphere. The vial was sealed with a screw-top septum cap and placed in a heating block that was pre-heated to 100 °C. The reaction was allowed to run at elevated temperature for 48 h. Then the reaction vial was allowed to cool to room temperature, and the reaction mixture was transferred directly to a preparative TLC, to afforded pure product.

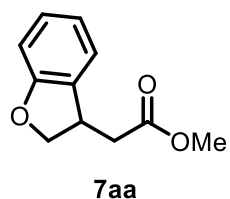

**Methyl 2-(2,3-dihydrobenzofuran-3-yl)acetate (7aa):** The title compound was prepared from **3aa** (30.4 mg, 0.1 mmol) according to the general procedure D. Purification using preparative TLC with 10:1 hexanes:EtOAc gave the product as a colorless oil (15.6 mg, 81% yield).  $^1\text{H NMR}$  (600 MHz,  $\text{CDCl}_3$ )  $\delta$  7.18–7.12 (m, 2H), 6.86 (td,  $J = 7.5, 1.0$  Hz, 1H), 6.80 (dd,  $J = 7.8, 1.0$  Hz, 1H), 4.75 (t,  $J = 9.0$  Hz, 1H), 4.25 (dd,  $J = 9.2, 6.3$  Hz, 1H), 3.88 (tdd,  $J = 10.3, 7.9, 4.7$  Hz, 1H), 3.73 (s, 3H), 2.80 (dd,  $J = 16.5, 5.3$  Hz, 1H), 2.59 (dd,  $J = 16.5, 9.5$  Hz, 1H).  $^{13}\text{C NMR}$  (150 MHz,  $\text{CDCl}_3$ )  $\delta$  172.31, 159.83, 128.73, 128.09, 124.22, 120.60, 109.78, 76.73, 51.85, 39.26, 38.30. **HRMS (ESI-TOF)** Calcd for  $\text{C}_{11}\text{H}_{13}\text{O}_3^+$   $[\text{M}+\text{H}]^+$  193.0865, found 193.0862.

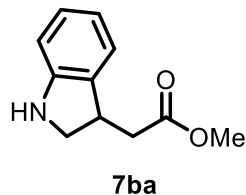

**Methyl 2-(indolin-3-yl)acetate (7ba):** The title compound was prepared from **3ba** (30.3 mg, 0.1 mmol) according to the general procedure D. Purification using preparative TLC with 10:1 hexanes:EtOAc gave the product as a colorless oil (17.0 mg, 89% yield).  $^1\text{H NMR}$  (600 MHz,  $\text{CDCl}_3$ )  $\delta$  7.08 (ddt,  $J = 7.6, 1.5, 0.8$  Hz, 1H), 7.05 (tdd,  $J = 7.8, 1.4, 0.7$  Hz, 1H), 6.72 (td,  $J = 7.4, 1.0$  Hz, 1H), 6.65 (dt,  $J = 7.8, 0.7$  Hz, 1H), 3.79 (t,  $J = 8.8$  Hz, 1H), 3.72 (s, 4H), 3.27 (dd,  $J = 8.9, 6.5$  Hz, 1H), 2.78 (dd,  $J = 16.1, 5.4$  Hz, 1H), 2.58 (dd,  $J = 16.1, 9.1$  Hz, 1H).  $^{13}\text{C NMR}$  (150 MHz,  $\text{CDCl}_3$ )  $\delta$  172.38, 150.76, 130.72, 127.54, 123.42, 118.30, 109.22, 52.90, 51.22, 38.27, 37.99. **HRMS (ESI-TOF)** Calcd for  $\text{C}_{11}\text{H}_{14}\text{O}_3^+$   $[\text{M}+\text{H}]^+$  192.2025, found 192.2026.

#### Procedure F for 50 mmol-Scale Reaction

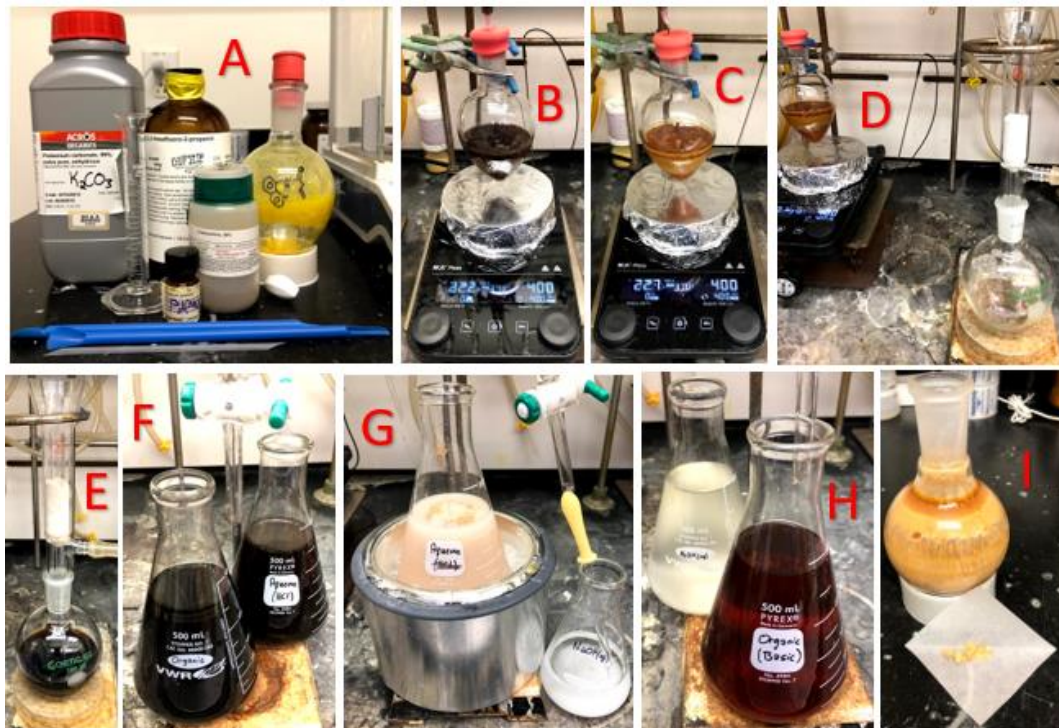

**Supplementary Figure 14:** Photographic depiction of the reaction procedure. A) Materials; B)  $t = 0$  min; C)  $t = 18$  h; D) Celite® filter setup E) Post Celite® filter; F) Acid workup; G) Basification of aqueous layer; H) Base workup; I) Product

To a solution of *N*-(quinolin-8-yl)but-3-enamide (50 mmol, 10.613 g, 1.0 equiv), 2-iodoaniline (60 mmol, 13.142 g, 1.2 equiv), and Pd(OAc)<sub>2</sub> (2.5 mmol, 561 mg, 5 mol%) in HFIP (0.5 M, 100 mL) was added K<sub>2</sub>CO<sub>3</sub> (50 mmol, 6.910 g, 1.0 equiv) at ambient temperature (21 °C – 24 °C). The deep brown reaction was placed on a stir plate at 400 rpm. After 18 h, the light brown reaction mixture was filtered through diatomaceous earth with ethyl acetate rinses (3 × 50 mL). The mixture was concentrated under reduced pressure to remove the HFIP, and HCl (300 mL, 2 N) was added to the concentrate. The aqueous phase was passed through a frit filter to remove any solids and transferred to a separatory funnel. The remaining material was dissolved or suspended in DCM, passed through the frit filter, and transferred to the separatory funnel. The aqueous phase was extracted with DCM (3 × 150 mL). The dark red–brown aqueous phase (pH < 2) was placed in an ice–water bath, and at 0 °C the concentrated aqueous NaOH was added until pH > 8 and the solution turned light orange. The aqueous phase (pH > 8) was transferred to a separatory funnel. The remaining material was dissolved in ethyl acetate and transferred to the separatory funnel. The aqueous phase was extracted with ethyl acetate (3 × 150 mL). The combined organic phase was washed with brine (1 × 100 mL) and dried over Na<sub>2</sub>SO<sub>4</sub>. The reaction was filtered through a cotton plug and concentrated under reduced pressure. The mixture was checked for purity by TLC. If impure, the mixture was dissolved in EtOAc:Hex (1:9) and filtered through a plug of silica gel for three column volumes. The filtrant was checked by TLC with EtOAc:Hex (1:1) to ensure that all unwanted material (R<sub>f</sub> = 0.92 and R<sub>f</sub> = 0.77) was no longer eluting from the plug of silica gel and that no product (R<sub>f</sub> = 0.45) had eluted. Three column volumes of EtOAc:Hex (9:1) were passed through the plug of silica gel eluting the product. The organic phase was concentrated under reduced pressure to afford the pure product as a yellow solid (14.292 g, 94.2%).

### Unsuccessful examples

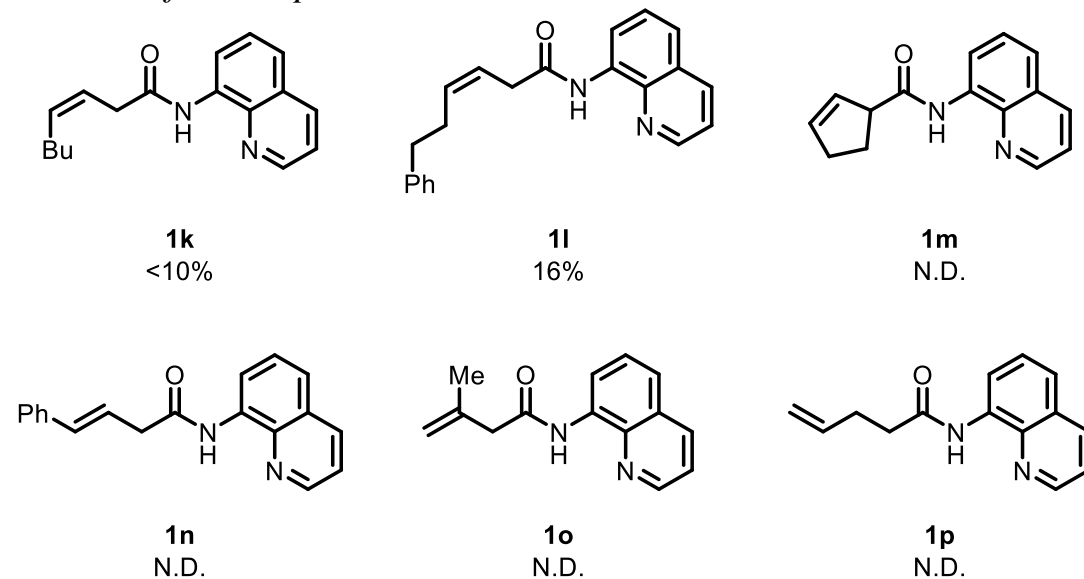

**Supplementary Figure 15:** Unsuccessful alkene examples.

**1k–p** were prepared according to literature procedures.<sup>1–9</sup> To a 4-mL scintillation vial equipped with a Teflon-coated magnetic stir bar were added the Pd(OAc)<sub>2</sub> (1.1 mg, 0.005 mmol, 5 mol%), alkene substrate (21.2 mg, 0.1 mmol), the appropriate 2-iodophenol (26.4 mg, 0.12 mmol, 1.2 equiv), K<sub>2</sub>CO<sub>3</sub> (13.8 mg, 0.1 mmol, 1 equiv), and HFIP (0.1 mL). The vial was sealed with a screw-top septum cap and placed in a heating block that was pre-heated to 80 °C. The reaction was

allowed to run for 24 h and then was cooled to room temperature. Yields were determined by  $^1\text{H}$  crude NMR using  $\text{CH}_2\text{Br}_2$  as internal standard.

### X-Ray Crystallography

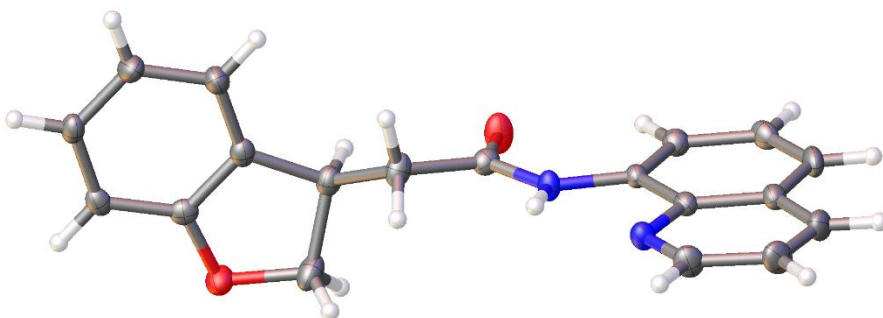

*Supplementary Figure 16:* Crystal data and structure refinement for **3aa**.

### Experimental Summary

The single crystal X-ray diffraction studies were carried out on a Bruker APEX II Ultra CCD diffractometer equipped with Mo  $\text{K}\alpha$  radiation ( $\lambda = 0.71073$ ). Crystals of the subject compound were used as received (grown from DCM/Hexanes). A 0.090 x 0.080 x 0.065 mm colorless plank was mounted on a Cryoloop with Paratone oil.

Data were collected in a nitrogen gas stream at 100(2) K using  $\omega$  and  $\phi$  scans. Crystal-to-detector distance was 40 mm using exposure time 5.0s (depending on the detector  $2\theta$  position) with a scan width of  $0.75^\circ$ . Data collection was 100.0% complete to  $25.242^\circ$  in  $\theta$ . A total of 10384 reflections were collected covering the indices,  $-13 \leq h \leq 15$ ,  $-20 \leq k \leq 19$ ,  $-8 \leq l \leq 6$ . 2817 reflections were found to be symmetry independent, with a  $R_{\text{int}}$  of 0.0383. Indexing and unit cell refinement indicated a **Primitive, Monoclinic** lattice. The space group was found to be ***P2<sub>1</sub>/c***. The data were integrated using the Bruker SAINT Software program and scaled using the SADABS software program. Solution by direct methods (SHELXT) produced a complete phasing model consistent with the proposed structure.



All nonhydrogen atoms were refined anisotropically by full-matrix least-squares (SHELXL-2014). All carbon bonded hydrogen atoms were placed using a riding model. Their positions were constrained relative to their parent atom using the appropriate HFIX command in SHELXL-2014.

*Notes:* Good data and refinement.  
Clean residual maps!

**Supplementary Table 9.** Crystal data and structure refinement for **3aa**.

|                                 |                                                                                                                                  |
|---------------------------------|----------------------------------------------------------------------------------------------------------------------------------|
| Report date                     | 2020-09-09                                                                                                                       |
| Identification code             | engle267                                                                                                                         |
| Empirical formula               | C <sub>19</sub> H <sub>16</sub> N <sub>2</sub> O <sub>2</sub>                                                                    |
| Molecular formula               | C <sub>19</sub> H <sub>16</sub> N <sub>2</sub> O <sub>2</sub>                                                                    |
| Formula weight                  | 304.34                                                                                                                           |
| Temperature                     | 100.0 K                                                                                                                          |
| Wavelength                      | 0.71073 Å                                                                                                                        |
| Crystal system                  | Monoclinic                                                                                                                       |
| Space group                     | P 1 21/c 1                                                                                                                       |
| Unit cell dimensions            | a = 12.5000(6) Å $\alpha = 90^\circ$ .<br>b = 16.7572(8) Å $\beta = 103.430(2)^\circ$ .<br>c = 7.3043(4) Å $\gamma = 90^\circ$ . |
| Volume                          | 1488.16(13) Å <sup>3</sup>                                                                                                       |
| Z                               | 4                                                                                                                                |
| Density (calculated)            | 1.358 Mg/m <sup>3</sup>                                                                                                          |
| Absorption coefficient          | 0.089 mm <sup>-1</sup>                                                                                                           |
| F(000)                          | 640                                                                                                                              |
| Crystal size                    | 0.09 x 0.08 x 0.065 mm <sup>3</sup>                                                                                              |
| Crystal color, habit            | colorless plank                                                                                                                  |
| Theta range for data collection | 1.675 to 25.679°.                                                                                                                |
| Index ranges                    | -13 ≤ h ≤ 15, -20 ≤ k ≤ 19, -8 ≤ l ≤ 6                                                                                           |
| Reflections collected           | 10384                                                                                                                            |
| Independent reflections         | 2817 [R(int) = 0.0383]                                                                                                           |
| Completeness to theta = 25.242° | 100.0 %                                                                                                                          |
| Absorption correction           | Semi-empirical from equivalents                                                                                                  |
| Max. and min. transmission      | 0.5622 and 0.5015                                                                                                                |
| Refinement method               | Full-matrix least-squares on F <sup>2</sup>                                                                                      |
| Data / restraints / parameters  | 2817 / 1 / 211                                                                                                                   |

|                                      |                                    |
|--------------------------------------|------------------------------------|
| Goodness-of-fit on $F^2$             | 1.039                              |
| Final R indices [ $I > 2\sigma(I)$ ] | R1 = 0.0445, wR2 = 0.0964          |
| R indices (all data)                 | R1 = 0.0656, wR2 = 0.1054          |
| Largest diff. peak and hole          | 0.261 and -0.214 e.Å <sup>-3</sup> |

**Supplementary Table 10.** Atomic coordinates ( $\times 10^4$ ) and equivalent isotropic displacement parameters ( $\text{\AA}^2 \times 10^3$ )

for **3aa**.  $U(\text{eq})$  is defined as one third of the trace of the orthogonalized  $U^{ij}$  tensor.

|       | x        | y       | z       | U(eq) |
|-------|----------|---------|---------|-------|
| O(1)  | 6977(1)  | 4186(1) | 4007(2) | 24(1) |
| O(2)  | 4198(1)  | 2067(1) | 4238(2) | 29(1) |
| N(1)  | 674(1)   | 3332(1) | 1398(2) | 21(1) |
| N(2)  | 2677(1)  | 2808(1) | 3002(2) | 19(1) |
| C(1)  | 5974(2)  | 3728(1) | 3312(3) | 30(1) |
| C(2)  | 5552(1)  | 3471(1) | 5026(3) | 22(1) |
| C(3)  | 6147(1)  | 4055(1) | 6486(3) | 20(1) |
| C(4)  | 6023(2)  | 4230(1) | 8270(3) | 25(1) |
| C(5)  | 6737(2)  | 4778(1) | 9363(3) | 26(1) |
| C(6)  | 7567(2)  | 5126(1) | 8664(3) | 22(1) |
| C(7)  | 7698(1)  | 4952(1) | 6865(3) | 20(1) |
| C(8)  | 6964(1)  | 4420(1) | 5804(3) | 19(1) |
| C(9)  | 4303(1)  | 3488(1) | 4723(3) | 23(1) |
| C(10) | 3742(1)  | 2714(1) | 3956(3) | 19(1) |
| C(11) | 1882(1)  | 2222(1) | 2328(2) | 16(1) |
| C(12) | 2059(2)  | 1416(1) | 2459(3) | 21(1) |
| C(13) | 1185(2)  | 883(1)  | 1747(3) | 24(1) |
| C(14) | 161(2)   | 1151(1) | 911(3)  | 25(1) |
| C(15) | -51(1)   | 1981(1) | 748(3)  | 21(1) |
| C(16) | -1090(2) | 2311(1) | -84(3)  | 27(1) |
| C(17) | -1225(2) | 3116(1) | -161(3) | 30(1) |
| C(18) | -313(2)  | 3603(1) | 605(3)  | 27(1) |
| C(19) | 809(1)   | 2523(1) | 1469(3) | 18(1) |

**Supplementary Table 11.** Bond lengths [Å] and angles [°] for **3aa**.

|             |           |                  |            |
|-------------|-----------|------------------|------------|
| O(1)-C(1)   | 1.456(2)  | C(15)-C(16)      | 1.412(3)   |
| O(1)-C(8)   | 1.374(2)  | C(15)-C(19)      | 1.413(2)   |
| O(2)-C(10)  | 1.220(2)  | C(16)-H(16)      | 0.9500     |
| N(1)-C(18)  | 1.316(2)  | C(16)-C(17)      | 1.360(3)   |
| N(1)-C(19)  | 1.366(2)  | C(17)-H(17)      | 0.9500     |
| N(2)-H(2)   | 0.868(15) | C(17)-C(18)      | 1.408(3)   |
| N(2)-C(10)  | 1.361(2)  | C(18)-H(18)      | 0.9500     |
| N(2)-C(11)  | 1.403(2)  |                  |            |
| C(1)-H(1A)  | 0.9900    | C(8)-O(1)-C(1)   | 106.45(13) |
| C(1)-H(1B)  | 0.9900    | C(18)-N(1)-C(19) | 117.00(16) |
| C(1)-C(2)   | 1.529(3)  | C(10)-N(2)-H(2)  | 118.2(13)  |
| C(2)-H(2A)  | 1.0000    | C(10)-N(2)-C(11) | 128.82(16) |
| C(2)-C(3)   | 1.510(3)  | C(11)-N(2)-H(2)  | 112.8(13)  |
| C(2)-C(9)   | 1.525(2)  | O(1)-C(1)-H(1A)  | 110.3      |
| C(3)-C(4)   | 1.379(3)  | O(1)-C(1)-H(1B)  | 110.3      |
| C(3)-C(8)   | 1.379(2)  | O(1)-C(1)-C(2)   | 107.21(15) |
| C(4)-H(4)   | 0.9500    | H(1A)-C(1)-H(1B) | 108.5      |
| C(4)-C(5)   | 1.395(3)  | C(2)-C(1)-H(1A)  | 110.3      |
| C(5)-H(5)   | 0.9500    | C(2)-C(1)-H(1B)  | 110.3      |
| C(5)-C(6)   | 1.388(3)  | C(1)-C(2)-H(2A)  | 109.0      |
| C(6)-H(6)   | 0.9500    | C(3)-C(2)-C(1)   | 100.87(15) |
| C(6)-C(7)   | 1.392(3)  | C(3)-C(2)-H(2A)  | 109.0      |
| C(7)-H(7)   | 0.9500    | C(3)-C(2)-C(9)   | 114.26(15) |
| C(7)-C(8)   | 1.381(3)  | C(9)-C(2)-C(1)   | 114.37(16) |
| C(9)-H(9A)  | 0.9900    | C(9)-C(2)-H(2A)  | 109.0      |
| C(9)-H(9B)  | 0.9900    | C(4)-C(3)-C(2)   | 131.27(16) |
| C(9)-C(10)  | 1.517(3)  | C(8)-C(3)-C(2)   | 108.51(16) |
| C(11)-C(12) | 1.368(3)  | C(8)-C(3)-C(4)   | 120.16(17) |
| C(11)-C(19) | 1.435(2)  | C(3)-C(4)-H(4)   | 120.6      |
| C(12)-H(12) | 0.9500    | C(3)-C(4)-C(5)   | 118.87(17) |
| C(12)-C(13) | 1.413(3)  | C(5)-C(4)-H(4)   | 120.6      |
| C(13)-H(13) | 0.9500    | C(4)-C(5)-H(5)   | 120.0      |
| C(13)-C(14) | 1.361(3)  | C(6)-C(5)-C(4)   | 120.03(18) |
| C(14)-H(14) | 0.9500    | C(6)-C(5)-H(5)   | 120.0      |
| C(14)-C(15) | 1.415(3)  | C(5)-C(6)-H(6)   | 119.3      |

|                   |            |                   |            |
|-------------------|------------|-------------------|------------|
| C(5)-C(6)-C(7)    | 121.37(17) | C(18)-C(17)-H(17) | 120.8      |
| C(7)-C(6)-H(6)    | 119.3      | N(1)-C(18)-C(17)  | 124.39(19) |
| C(6)-C(7)-H(7)    | 121.4      | N(1)-C(18)-H(18)  | 117.8      |
| C(8)-C(7)-C(6)    | 117.18(16) | C(17)-C(18)-H(18) | 117.8      |
| C(8)-C(7)-H(7)    | 121.4      | N(1)-C(19)-C(11)  | 117.46(15) |
| O(1)-C(8)-C(3)    | 113.09(16) | N(1)-C(19)-C(15)  | 123.23(16) |
| O(1)-C(8)-C(7)    | 124.54(16) | C(15)-C(19)-C(11) | 119.31(17) |
| C(3)-C(8)-C(7)    | 122.36(17) |                   |            |
| C(2)-C(9)-H(9A)   | 108.7      |                   |            |
| C(2)-C(9)-H(9B)   | 108.7      |                   |            |
| H(9A)-C(9)-H(9B)  | 107.6      |                   |            |
| C(10)-C(9)-C(2)   | 114.08(15) |                   |            |
| C(10)-C(9)-H(9A)  | 108.7      |                   |            |
| C(10)-C(9)-H(9B)  | 108.7      |                   |            |
| O(2)-C(10)-N(2)   | 123.55(17) |                   |            |
| O(2)-C(10)-C(9)   | 122.62(16) |                   |            |
| N(2)-C(10)-C(9)   | 113.77(15) |                   |            |
| N(2)-C(11)-C(19)  | 114.85(15) |                   |            |
| C(12)-C(11)-N(2)  | 125.27(16) |                   |            |
| C(12)-C(11)-C(19) | 119.87(16) |                   |            |
| C(11)-C(12)-H(12) | 120.0      |                   |            |
| C(11)-C(12)-C(13) | 119.93(17) |                   |            |
| C(13)-C(12)-H(12) | 120.0      |                   |            |
| C(12)-C(13)-H(13) | 119.2      |                   |            |
| C(14)-C(13)-C(12) | 121.55(18) |                   |            |
| C(14)-C(13)-H(13) | 119.2      |                   |            |
| C(13)-C(14)-H(14) | 120.0      |                   |            |
| C(13)-C(14)-C(15) | 120.01(17) |                   |            |
| C(15)-C(14)-H(14) | 120.0      |                   |            |
| C(16)-C(15)-C(14) | 123.78(17) |                   |            |
| C(16)-C(15)-C(19) | 116.90(18) |                   |            |
| C(19)-C(15)-C(14) | 119.32(17) |                   |            |
| C(15)-C(16)-H(16) | 120.0      |                   |            |
| C(17)-C(16)-C(15) | 119.99(18) |                   |            |
| C(17)-C(16)-H(16) | 120.0      |                   |            |
| C(16)-C(17)-H(17) | 120.8      |                   |            |
| C(16)-C(17)-C(18) | 118.49(18) |                   |            |

---

**Supplementary Table 12.** Anisotropic displacement parameters ( $\text{\AA}^2 \times 10^3$ ) for Engle267. The anisotropic

displacement factor exponent takes the form:  $-2\pi^2 [ h^2 a^{*2} U_{11} + \dots + 2 h k a^* b^* U_{12} ]$

---

|       | U11   | U22   | U33   | U23    | U13   | U12    |
|-------|-------|-------|-------|--------|-------|--------|
| O(1)  | 24(1) | 26(1) | 23(1) | -5(1)  | 7(1)  | -2(1)  |
| O(2)  | 20(1) | 21(1) | 43(1) | -1(1)  | -1(1) | 4(1)   |
| N(1)  | 18(1) | 20(1) | 24(1) | 4(1)   | 1(1)  | -1(1)  |
| N(2)  | 16(1) | 13(1) | 25(1) | -1(1)  | 1(1)  | 0(1)   |
| C(1)  | 23(1) | 37(1) | 26(1) | -11(1) | 1(1)  | -3(1)  |
| C(2)  | 20(1) | 20(1) | 24(1) | -1(1)  | 0(1)  | 0(1)   |
| C(3)  | 18(1) | 17(1) | 23(1) | 3(1)   | 0(1)  | 0(1)   |
| C(4)  | 24(1) | 26(1) | 24(1) | 2(1)   | 4(1)  | -8(1)  |
| C(5)  | 32(1) | 27(1) | 19(1) | -2(1)  | 4(1)  | -9(1)  |
| C(6)  | 22(1) | 17(1) | 24(1) | 1(1)   | -1(1) | -3(1)  |
| C(7)  | 16(1) | 16(1) | 26(1) | 5(1)   | 3(1)  | 1(1)   |
| C(8)  | 19(1) | 16(1) | 20(1) | 3(1)   | 3(1)  | 5(1)   |
| C(9)  | 17(1) | 22(1) | 27(1) | -5(1)  | 0(1)  | 3(1)   |
| C(10) | 17(1) | 22(1) | 19(1) | 0(1)   | 4(1)  | 2(1)   |
| C(11) | 17(1) | 17(1) | 16(1) | -1(1)  | 4(1)  | -4(1)  |
| C(12) | 20(1) | 22(1) | 22(1) | 0(1)   | 6(1)  | -1(1)  |
| C(13) | 30(1) | 17(1) | 25(1) | -2(1)  | 10(1) | -4(1)  |
| C(14) | 27(1) | 24(1) | 25(1) | -6(1)  | 6(1)  | -13(1) |
| C(15) | 21(1) | 24(1) | 19(1) | -1(1)  | 5(1)  | -7(1)  |
| C(16) | 19(1) | 33(1) | 26(1) | 3(1)   | -1(1) | -9(1)  |
| C(17) | 18(1) | 35(1) | 32(1) | 10(1)  | -2(1) | 0(1)   |
| C(18) | 23(1) | 24(1) | 31(1) | 7(1)   | 1(1)  | 2(1)   |
| C(19) | 19(1) | 18(1) | 17(1) | 0(1)   | 5(1)  | -3(1)  |

---

**Supplementary Table 13.** Hydrogen coordinates ( $\times 10^4$ ) and isotropic displacement parameters ( $\text{\AA}^2 \times 10^3$ ) for **3aa**.

---

|       | x        | y       | z        | U(eq) |
|-------|----------|---------|----------|-------|
| H(2)  | 2413(15) | 3289(9) | 2840(30) | 22    |
| H(1A) | 6130     | 3254    | 2608     | 35    |
| H(1B) | 5417     | 4059    | 2460     | 35    |
| H(2A) | 5822     | 2920    | 5402     | 26    |
| H(4)  | 5460     | 3981    | 8747     | 30    |
| H(5)  | 6655     | 4912    | 10587    | 31    |
| H(6)  | 8057     | 5492    | 9429     | 26    |
| H(7)  | 8267     | 5190    | 6388     | 24    |
| H(9A) | 4115     | 3609    | 5937     | 27    |
| H(9B) | 4008     | 3925    | 3837     | 27    |
| H(12) | 2769     | 1215    | 3029     | 25    |
| H(13) | 1316     | 325     | 1855     | 28    |
| H(14) | -413     | 781     | 436      | 30    |
| H(16) | -1693    | 1970    | -590     | 33    |
| H(17) | -1920    | 3345    | -719     | 36    |
| H(18) | -417     | 4165    | 545      | 32    |

---

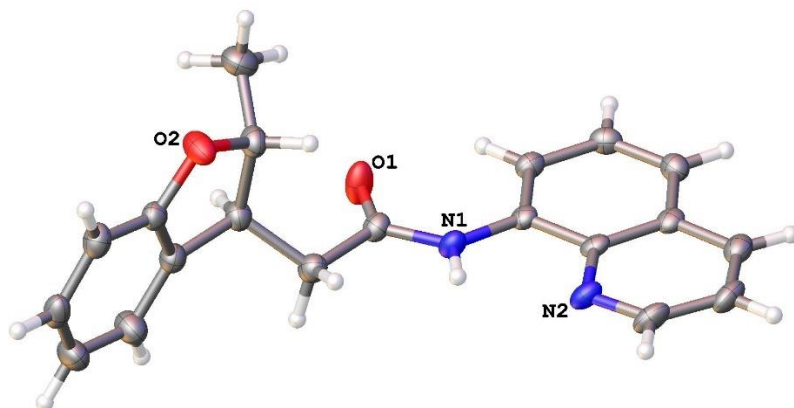

**Supplementary Figure 17:** Crystal data and structure refinement for major diastereomer of **4ga**.

The single crystal X-ray diffraction studies were carried out on a Bruker APEX II ULTRA CCD diffractometer equipped with Mo  $K_{\alpha}$  radiation ( $\lambda = 0.71073 \text{ \AA}$ ). Crystals of the subject compound (grown from toluene/hexane) were used as received. A 0.100 x 0.050 x 0.030 mm colorless block crystal was mounted on a Cryoloop with Paratone N oil.

Data were collected in a nitrogen gas stream at 100(2) K using  $\omega$  and  $\phi$  scans. Crystal-to-detector distance was 40 mm using an exposure time of 10 seconds with a scan width of  $0.65^{\circ}$ . Data collection was 100.0% complete to  $25.242^{\circ}$  in  $\theta$ . A total of 13413 reflections were collected. 3019 reflections were found to be symmetry independent, with an  $R_{\text{int}}$  of 0.0431. Indexing and unit cell refinement indicated a **Primitive Monoclinic** lattice. The space group was found to be  **$P2_1/c$** . The data were integrated using the Bruker SAINT Software program and scaled using the SADABS software program. Solution by direct methods (SHELXT) produced a complete phasing model consistent with the proposed structure.

All non-hydrogen atoms were refined anisotropically by full-matrix least-squares (SHELXL-2014). All carbon bonded hydrogen atoms were placed using a riding model. Their positions were constrained relative to their parent atom using the appropriate HFIX command in SHELXL-2014.

*Notes:* Excellent data and refinement. Although this molecule has chiral centers, it crystallized out in the centrosymmetric space group,  **$P2_1/c$** , as the racemate.

**Supplementary Table 14:** Crystal data and structure refinement for **4ga**.

|                      |                                                               |                                  |
|----------------------|---------------------------------------------------------------|----------------------------------|
| Report date          | 2019-11-19                                                    |                                  |
| Identification code  | Engle220                                                      |                                  |
| Empirical formula    | C <sub>20</sub> H <sub>18</sub> N <sub>2</sub> O <sub>2</sub> |                                  |
| Formula weight       | 318.36                                                        |                                  |
| Temperature          | 100.0 K                                                       |                                  |
| Wavelength           | 0.71073 $\text{\AA}$                                          |                                  |
| Crystal system       | Monoclinic                                                    |                                  |
| Space group          | $P 1 2_1/c 1$                                                 |                                  |
| Unit cell dimensions | $a = 8.4597(4) \text{ \AA}$                                   | $\square = 90^{\circ}$ .         |
|                      | $b = 22.8443(8) \text{ \AA}$                                  | $\square = 103.990(2)^{\circ}$ . |
|                      | $c = 8.4530(4) \text{ \AA}$                                   | $\square = 90^{\circ}$ .         |
| Volume               | $1585.14(12) \text{ \AA}^3$                                   |                                  |



|                                   |                                             |
|-----------------------------------|---------------------------------------------|
| Z                                 | 4                                           |
| Density (calculated)              | 1.334 Mg/m <sup>3</sup>                     |
| Absorption coefficient            | 0.087 mm <sup>-1</sup>                      |
| F(000)                            | 672                                         |
| Crystal size                      | 0.1 x 0.05 x 0.03 mm <sup>3</sup>           |
| Theta range for data collection   | 1.783 to 25.680°.                           |
| Index ranges                      | -10<=h<=10, -18<=k<=27, -10<=l<=10          |
| Reflections collected             | 13413                                       |
| Independent reflections           | 3019 [R(int) = 0.0431]                      |
| Completeness to theta = 25.242°   | 100.0 %                                     |
| Absorption correction             | Semi-empirical from equivalents             |
| Max. and min. transmission        | 0.7454 and 0.6844                           |
| Refinement method                 | Full-matrix least-squares on F <sup>2</sup> |
| Data / restraints / parameters    | 3019 / 0 / 218                              |
| Goodness-of-fit on F <sup>2</sup> | 1.048                                       |
| Final R indices [I>2sigma(I)]     | R1 = 0.0458, wR2 = 0.1179                   |
| R indices (all data)              | R1 = 0.0548, wR2 = 0.1234                   |
| Extinction coefficient            | n/a                                         |
| Largest diff. peak and hole       | 0.431 and -0.218 e.Å <sup>-3</sup>          |

**Supplementary Table 15:** Atomic coordinates ( x 10<sup>4</sup>) and equivalent isotropic displacement parameters (Å<sup>2</sup>x 10<sup>3</sup>) for **4ga**. U(eq) is defined as one third of the trace of the orthogonalized U<sup>ij</sup> tensor.

|       | x       | y       | z       | U(eq) |
|-------|---------|---------|---------|-------|
| O(1)  | 7960(2) | 4306(1) | 9111(2) | 37(1) |
| O(2)  | 8161(2) | 2244(1) | 7936(2) | 35(1) |
| N(1)  | 7186(2) | 4467(1) | 6381(2) | 24(1) |
| N(2)  | 6778(2) | 4879(1) | 3377(2) | 26(1) |
| C(1)  | 7194(2) | 4159(1) | 7752(2) | 24(1) |
| C(2)  | 7989(2) | 4994(1) | 6221(2) | 20(1) |
| C(3)  | 9001(2) | 5296(1) | 7476(2) | 22(1) |
| C(4)  | 9784(2) | 5810(1) | 7142(2) | 25(1) |
| C(5)  | 9566(2) | 6023(1) | 5595(2) | 25(1) |
| C(6)  | 8543(2) | 5720(1) | 4282(2) | 23(1) |
| C(7)  | 8297(2) | 5895(1) | 2633(2) | 29(1) |
| C(8)  | 7356(2) | 5562(1) | 1432(2) | 32(1) |
| C(9)  | 6629(2) | 5056(1) | 1864(2) | 32(1) |
| C(10) | 7749(2) | 5204(1) | 4588(2) | 20(1) |
| C(11) | 6148(2) | 3612(1) | 7484(2) | 27(1) |
| C(12) | 6889(2) | 3120(1) | 8654(2) | 25(1) |
| C(13) | 8462(2) | 2866(1) | 8310(2) | 28(1) |

|       |         |         |         |       |
|-------|---------|---------|---------|-------|
| C(14) | 9965(2) | 2916(1) | 9680(3) | 40(1) |
| C(15) | 6617(2) | 2114(1) | 8059(2) | 24(1) |
| C(16) | 5930(2) | 1565(1) | 7793(2) | 30(1) |
| C(17) | 4348(2) | 1501(1) | 7950(2) | 31(1) |
| C(18) | 3510(2) | 1975(1) | 8402(3) | 40(1) |
| C(19) | 4246(2) | 2521(1) | 8681(3) | 37(1) |
| C(20) | 5811(2) | 2591(1) | 8481(2) | 26(1) |

---

**Supplementary Table 16:** Bond lengths [Å] and angles [°] for **4ga**.

|              |          |
|--------------|----------|
| O(1)-C(1)    | 1.222(2) |
| O(2)-C(13)   | 1.464(2) |
| O(2)-C(15)   | 1.368(2) |
| N(1)-H(1)    | 0.8800   |
| N(1)-C(1)    | 1.355(2) |
| N(1)-C(2)    | 1.403(2) |
| N(2)-C(9)    | 1.319(2) |
| N(2)-C(10)   | 1.366(2) |
| C(1)-C(11)   | 1.517(2) |
| C(2)-C(3)    | 1.377(2) |
| C(2)-C(10)   | 1.429(2) |
| C(3)-H(3)    | 0.9500   |
| C(3)-C(4)    | 1.411(2) |
| C(4)-H(4)    | 0.9500   |
| C(4)-C(5)    | 1.365(2) |
| C(5)-H(5)    | 0.9500   |
| C(5)-C(6)    | 1.412(2) |
| C(6)-C(7)    | 1.416(2) |
| C(6)-C(10)   | 1.413(2) |
| C(7)-H(7)    | 0.9500   |
| C(7)-C(8)    | 1.362(3) |
| C(8)-H(8)    | 0.9500   |
| C(8)-C(9)    | 1.397(3) |
| C(9)-H(9)    | 0.9500   |
| C(11)-H(11A) | 0.9900   |
| C(11)-H(11B) | 0.9900   |
| C(11)-C(12)  | 1.527(2) |
| C(12)-H(12)  | 1.0000   |
| C(12)-C(13)  | 1.543(2) |
| C(12)-C(20)  | 1.500(2) |
| C(13)-H(13)  | 1.0000   |
| C(13)-C(14)  | 1.503(3) |
| C(14)-H(14A) | 0.9800   |
| C(14)-H(14B) | 0.9800   |
| C(14)-H(14C) | 0.9800   |
| C(15)-C(16)  | 1.377(3) |

|             |          |
|-------------|----------|
| C(15)-C(20) | 1.377(2) |
| C(16)-H(16) | 0.9500   |
| C(16)-C(17) | 1.385(3) |
| C(17)-H(17) | 0.9500   |
| C(17)-C(18) | 1.397(3) |
| C(18)-H(18) | 0.9500   |
| C(18)-C(19) | 1.390(3) |
| C(19)-H(19) | 0.9500   |
| C(19)-C(20) | 1.384(3) |

|                   |            |
|-------------------|------------|
| C(15)-O(2)-C(13)  | 108.38(13) |
| C(1)-N(1)-H(1)    | 115.6      |
| C(1)-N(1)-C(2)    | 128.75(14) |
| C(2)-N(1)-H(1)    | 115.6      |
| C(9)-N(2)-C(10)   | 117.30(16) |
| O(1)-C(1)-N(1)    | 123.52(16) |
| O(1)-C(1)-C(11)   | 121.69(15) |
| N(1)-C(1)-C(11)   | 114.78(14) |
| N(1)-C(2)-C(10)   | 114.94(14) |
| C(3)-C(2)-N(1)    | 125.46(15) |
| C(3)-C(2)-C(10)   | 119.55(15) |
| C(2)-C(3)-H(3)    | 120.1      |
| C(2)-C(3)-C(4)    | 119.86(15) |
| C(4)-C(3)-H(3)    | 120.1      |
| C(3)-C(4)-H(4)    | 119.1      |
| C(5)-C(4)-C(3)    | 121.83(16) |
| C(5)-C(4)-H(4)    | 119.1      |
| C(4)-C(5)-H(5)    | 120.2      |
| C(4)-C(5)-C(6)    | 119.55(16) |
| C(6)-C(5)-H(5)    | 120.2      |
| C(5)-C(6)-C(7)    | 123.49(16) |
| C(5)-C(6)-C(10)   | 119.58(15) |
| C(10)-C(6)-C(7)   | 116.90(15) |
| C(6)-C(7)-H(7)    | 120.1      |
| C(8)-C(7)-C(6)    | 119.76(17) |
| C(8)-C(7)-H(7)    | 120.1      |
| C(7)-C(8)-H(8)    | 120.6      |
| C(7)-C(8)-C(9)    | 118.83(16) |
| C(9)-C(8)-H(8)    | 120.6      |
| N(2)-C(9)-C(8)    | 124.26(17) |
| N(2)-C(9)-H(9)    | 117.9      |
| C(8)-C(9)-H(9)    | 117.9      |
| N(2)-C(10)-C(2)   | 117.45(15) |
| N(2)-C(10)-C(6)   | 122.91(15) |
| C(6)-C(10)-C(2)   | 119.61(14) |
| C(1)-C(11)-H(11A) | 109.2      |
| C(1)-C(11)-H(11B) | 109.2      |

|                     |            |
|---------------------|------------|
| C(1)-C(11)-C(12)    | 112.11(14) |
| H(11A)-C(11)-H(11B) | 107.9      |
| C(12)-C(11)-H(11A)  | 109.2      |
| C(12)-C(11)-H(11B)  | 109.2      |
| C(11)-C(12)-H(12)   | 109.6      |
| C(11)-C(12)-C(13)   | 113.07(14) |
| C(13)-C(12)-H(12)   | 109.6      |
| C(20)-C(12)-C(11)   | 112.67(15) |
| C(20)-C(12)-H(12)   | 109.6      |
| C(20)-C(12)-C(13)   | 102.15(14) |
| O(2)-C(13)-C(12)    | 106.99(14) |
| O(2)-C(13)-H(13)    | 108.6      |
| O(2)-C(13)-C(14)    | 108.11(15) |
| C(12)-C(13)-H(13)   | 108.6      |
| C(14)-C(13)-C(12)   | 115.69(16) |
| C(14)-C(13)-H(13)   | 108.6      |
| C(13)-C(14)-H(14A)  | 109.5      |
| C(13)-C(14)-H(14B)  | 109.5      |
| C(13)-C(14)-H(14C)  | 109.5      |
| H(14A)-C(14)-H(14B) | 109.5      |
| H(14A)-C(14)-H(14C) | 109.5      |
| H(14B)-C(14)-H(14C) | 109.5      |
| O(2)-C(15)-C(16)    | 124.03(16) |
| O(2)-C(15)-C(20)    | 112.85(15) |
| C(16)-C(15)-C(20)   | 123.12(17) |
| C(15)-C(16)-H(16)   | 121.3      |
| C(15)-C(16)-C(17)   | 117.39(17) |
| C(17)-C(16)-H(16)   | 121.3      |
| C(16)-C(17)-H(17)   | 119.6      |
| C(16)-C(17)-C(18)   | 120.74(17) |
| C(18)-C(17)-H(17)   | 119.6      |
| C(17)-C(18)-H(18)   | 119.8      |
| C(19)-C(18)-C(17)   | 120.41(18) |
| C(19)-C(18)-H(18)   | 119.8      |
| C(18)-C(19)-H(19)   | 120.5      |
| C(20)-C(19)-C(18)   | 118.99(18) |
| C(20)-C(19)-H(19)   | 120.5      |
| C(15)-C(20)-C(12)   | 109.61(15) |
| C(15)-C(20)-C(19)   | 119.31(17) |
| C(19)-C(20)-C(12)   | 131.07(17) |

---

**Supplementary Table 17:** Anisotropic displacement parameters ( $\text{\AA}^2 \times 10^3$ ) for **4ga**. The anisotropic

displacement factor exponent takes the form:  $-2\pi^2 [ h^2 a^{*2} U^{11} + \dots + 2 h k a^* b^* U^{12} ]$

|       | U11   | U22   | U33   | U23   | U13   | U12    |
|-------|-------|-------|-------|-------|-------|--------|
| O(1)  | 59(1) | 29(1) | 21(1) | 0(1)  | 6(1)  | -12(1) |
| O(2)  | 31(1) | 22(1) | 57(1) | -1(1) | 20(1) | 1(1)   |
| N(1)  | 26(1) | 20(1) | 21(1) | 0(1)  | -1(1) | -1(1)  |
| N(2)  | 29(1) | 22(1) | 22(1) | 0(1)  | -3(1) | 6(1)   |
| C(1)  | 28(1) | 19(1) | 24(1) | 0(1)  | 6(1)  | 4(1)   |
| C(2)  | 20(1) | 16(1) | 24(1) | 0(1)  | 4(1)  | 5(1)   |
| C(3)  | 24(1) | 23(1) | 20(1) | -2(1) | 4(1)  | 5(1)   |
| C(4)  | 23(1) | 23(1) | 28(1) | -7(1) | 3(1)  | 0(1)   |
| C(5)  | 24(1) | 20(1) | 32(1) | -1(1) | 8(1)  | 0(1)   |
| C(6)  | 22(1) | 21(1) | 26(1) | 1(1)  | 7(1)  | 8(1)   |
| C(7)  | 29(1) | 28(1) | 31(1) | 6(1)  | 9(1)  | 8(1)   |
| C(8)  | 38(1) | 35(1) | 22(1) | 7(1)  | 4(1)  | 14(1)  |
| C(9)  | 36(1) | 31(1) | 22(1) | -1(1) | -5(1) | 10(1)  |
| C(10) | 20(1) | 18(1) | 22(1) | -1(1) | 1(1)  | 7(1)   |
| C(11) | 27(1) | 23(1) | 30(1) | 1(1)  | 4(1)  | 0(1)   |
| C(12) | 27(1) | 23(1) | 27(1) | 1(1)  | 10(1) | 0(1)   |
| C(13) | 31(1) | 21(1) | 35(1) | 3(1)  | 12(1) | 0(1)   |
| C(14) | 28(1) | 46(1) | 47(1) | 1(1)  | 11(1) | -1(1)  |
| C(15) | 26(1) | 24(1) | 22(1) | 2(1)  | 8(1)  | 1(1)   |
| C(16) | 40(1) | 22(1) | 28(1) | 0(1)  | 9(1)  | 0(1)   |
| C(17) | 36(1) | 26(1) | 28(1) | 4(1)  | 1(1)  | -9(1)  |
| C(18) | 29(1) | 36(1) | 54(1) | 7(1)  | 12(1) | -5(1)  |
| C(19) | 32(1) | 31(1) | 50(1) | 2(1)  | 16(1) | -1(1)  |
| C(20) | 27(1) | 24(1) | 28(1) | 4(1)  | 7(1)  | 1(1)   |

**Supplementary Table 18:** Hydrogen coordinates ( $\times 10^4$ ) and isotropic displacement parameters ( $\text{\AA}^2 \times 10^3$ ) for **4ga**.

|        | x     | y    | z     | U(eq) |
|--------|-------|------|-------|-------|
| H(1)   | 6597  | 4318 | 5469  | 28    |
| H(3)   | 9172  | 5158 | 8564  | 27    |
| H(4)   | 10483 | 6014 | 8018  | 30    |
| H(5)   | 10098 | 6373 | 5404  | 30    |
| H(7)   | 8786  | 6244 | 2366  | 34    |
| H(8)   | 7196  | 5671 | 320   | 39    |
| H(9)   | 5986  | 4826 | 1012  | 38    |
| H(11A) | 6018  | 3475 | 6348  | 33    |
| H(11B) | 5053  | 3707 | 7636  | 33    |
| H(12)  | 7118  | 3266 | 9801  | 30    |
| H(13)  | 8671  | 3065 | 7327  | 34    |
| H(14A) | 9755  | 2743 | 10670 | 60    |
| H(14B) | 10252 | 3330 | 9877  | 60    |
| H(14C) | 10867 | 2709 | 9387  | 60    |
| H(16)  | 6519  | 1243 | 7514  | 36    |
| H(17)  | 3826  | 1131 | 7748  | 37    |
| H(18)  | 2429  | 1923 | 8519  | 48    |
| H(19)  | 3683  | 2842 | 9005  | 44    |

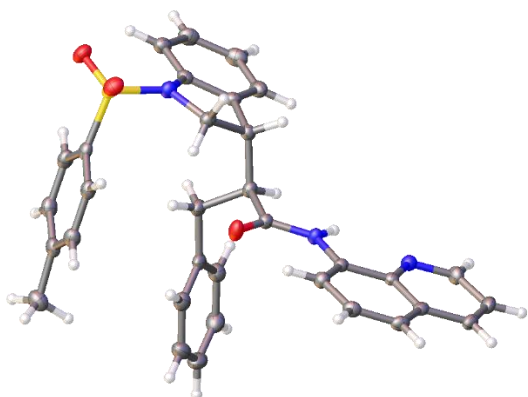

**Supplementary Figure 18:** Crystal data and structure refinement for major diastereomer of **4cp**.

The single crystal X-ray diffraction studies were carried out on a Bruker SMART APEX II CCD diffractometer equipped with Cu  $K_\alpha$  radiation ( $\lambda = 1.54178$ ). Crystals of the subject compound were used as received (grown from a toluene/hexane mixture). A 0.2 x 0.12 x 0.08 mm colorless irregular crystal was mounted on a Cryoloop with Paratone oil.

Data were collected in a nitrogen gas stream at 100(2) K using  $\phi$  and  $\omega$  scans. Crystal-to-detector distance was 40 mm using exposure times 2, 4, and 8 seconds (depending on the  $2\theta$  position) with a scan width of  $1.25^\circ$ . Data collection was 100.0 complete to  $67.500^\circ$  in  $\theta$ . A total of 20853 reflections were collected. 10562 reflections were found to be symmetry independent, with a  $R_{\text{int}}$  of 0.0221. Indexing and unit cell refinement indicated a **Primitive Triclinic** lattice. The space group was found to be ***P*(-1)**. The data were integrated using the Bruker SAINT Software program and scaled using the SADABS software program. Solution by direct methods (SHELXT) produced a complete phasing model consistent with the proposed structure.

All nonhydrogen atoms were refined anisotropically by full-matrix least-squares (SHELXL-2014). All carbon bonded hydrogen atoms were placed using a riding model. Their positions were constrained relative to their parent atom using the appropriate HFIX command in SHELXL-2014.

*Notes:* Excellent quality data. Refined as non-merohedral twin mimicking pseudo-merohedral twinning. During final refinement, HKLF 5 file was used with both components included. (TWIN law 1.00015 0.00060 -0.00043; -0.50721 -1.00075 -0.00147; -0.00637 0.00479 -0.99939)

**Supplementary Table 19:** Crystal data and structure refinement for **4cp**.

|                                   |                                             |                                 |
|-----------------------------------|---------------------------------------------|---------------------------------|
| Identification code               | engle228                                    |                                 |
| Empirical formula                 | C33 H29 N3 O3 S                             |                                 |
| Formula weight                    | 547.65                                      |                                 |
| Temperature                       | 100.0 K                                     |                                 |
| Wavelength                        | 1.54178 Å                                   |                                 |
| Crystal system                    | Triclinic                                   |                                 |
| Space group                       | P-1                                         |                                 |
| Unit cell dimensions              | a = 8.91770(10) Å                           | $\alpha = 102.3630(10)^\circ$ . |
|                                   | b = 9.60220(10) Å                           | $\beta = 90.0930(10)^\circ$ .   |
|                                   | c = 16.2563(2) Å                            | $\gamma = 103.6390(10)^\circ$ . |
| Volume                            | 1319.40(3) Å <sup>3</sup>                   |                                 |
| Z                                 | 2                                           |                                 |
| Density (calculated)              | 1.378 Mg/m <sup>3</sup>                     |                                 |
| Absorption coefficient            | 1.423 mm <sup>-1</sup>                      |                                 |
| F(000)                            | 576                                         |                                 |
| Crystal size                      | 0.2 x 0.12 x 0.08 mm <sup>3</sup>           |                                 |
| Theta range for data collection   | 2.787 to 70.095°.                           |                                 |
| Index ranges                      | -10 ≤ h ≤ 10, -11 ≤ k ≤ 11, -19 ≤ l ≤ 19    |                                 |
| Reflections collected             | 20853                                       |                                 |
| Independent reflections           | 10562 [R(int) = 0.0221]                     |                                 |
| Completeness to theta = 67.500°   | 100.0 %                                     |                                 |
| Absorption correction             | Semi-empirical from equivalents             |                                 |
| Max. and min. transmission        | 0.87 and 0.76                               |                                 |
| Refinement method                 | Full-matrix least-squares on F <sup>2</sup> |                                 |
| Data / restraints / parameters    | 10562 / 1 / 366                             |                                 |
| Goodness-of-fit on F <sup>2</sup> | 1.031                                       |                                 |
| Final R indices [I > 2σ(I)]       | R1 = 0.0347, wR2 = 0.0937                   |                                 |
| R indices (all data)              | R1 = 0.0393, wR2 = 0.0968                   |                                 |

Extinction coefficient n/a  
 Largest diff. peak and hole 0.286 and -0.455 e.Å<sup>-3</sup>

**Supplementary Table 20:** Atomic coordinates ( x 10<sup>4</sup>) and equivalent isotropic displacement parameters (Å<sup>2</sup>x 10<sup>3</sup>) for **4cp**. U(eq) is defined as one third of the trace of the orthogonalized U<sub>ij</sub> tensor.

|       | x        | y        | z       | U(eq) |
|-------|----------|----------|---------|-------|
| S(1)  | 10394(1) | 3671(1)  | 3046(1) | 21(1) |
| O(1)  | 10362(1) | 2165(1)  | 2695(1) | 27(1) |
| O(2)  | 11230(1) | 4422(1)  | 3829(1) | 27(1) |
| O(3)  | 8645(1)  | 8366(1)  | 3421(1) | 27(1) |
| N(1)  | 8609(2)  | 3790(1)  | 3178(1) | 21(1) |
| N(2)  | 6157(2)  | 8581(1)  | 3468(1) | 18(1) |
| N(3)  | 3617(2)  | 9571(1)  | 3642(1) | 19(1) |
| C(1)  | 12362(2) | 7219(2)  | 404(1)  | 31(1) |
| C(2)  | 11964(2) | 6314(2)  | 1062(1) | 24(1) |
| C(3)  | 12295(2) | 6961(2)  | 1917(1) | 24(1) |
| C(4)  | 11867(2) | 6162(2)  | 2531(1) | 22(1) |
| C(5)  | 11091(2) | 4689(2)  | 2285(1) | 21(1) |
| C(6)  | 10785(2) | 4012(2)  | 1433(1) | 24(1) |
| C(7)  | 11230(2) | 4823(2)  | 832(1)  | 26(1) |
| C(8)  | 7265(2)  | 2868(2)  | 2704(1) | 19(1) |
| C(9)  | 7014(2)  | 1420(2)  | 2263(1) | 24(1) |
| C(10) | 5543(2)  | 733(2)   | 1897(1) | 27(1) |
| C(11) | 4354(2)  | 1447(2)  | 1978(1) | 29(1) |
| C(12) | 4629(2)  | 2909(2)  | 2420(1) | 25(1) |
| C(13) | 6085(2)  | 3614(2)  | 2778(1) | 20(1) |
| C(14) | 6670(2)  | 5181(2)  | 3266(1) | 20(1) |
| C(15) | 8287(2)  | 5195(2)  | 3628(1) | 20(1) |
| C(16) | 6682(2)  | 6295(2)  | 2696(1) | 19(1) |
| C(17) | 7683(2)  | 6034(2)  | 1937(1) | 22(1) |
| C(18) | 7632(2)  | 7019(2)  | 1331(1) | 21(1) |
| C(19) | 6420(2)  | 6669(2)  | 720(1)  | 27(1) |
| C(20) | 6414(2)  | 7535(2)  | 135(1)  | 33(1) |
| C(21) | 7595(2)  | 8770(2)  | 168(1)  | 35(1) |
| C(22) | 8780(2)  | 9142(2)  | 782(1)  | 33(1) |
| C(23) | 8803(2)  | 8272(2)  | 1359(1) | 26(1) |
| C(24) | 7273(2)  | 7856(2)  | 3225(1) | 19(1) |
| C(25) | 6325(2)  | 10009(2) | 3961(1) | 17(1) |
| C(26) | 7686(2)  | 10904(2) | 4355(1) | 21(1) |
| C(27) | 7698(2)  | 12322(2) | 4831(1) | 22(1) |
| C(28) | 6394(2)  | 12838(2) | 4913(1) | 21(1) |
| C(29) | 4979(2)  | 11940(2) | 4512(1) | 19(1) |
| C(30) | 3577(2)  | 12385(2) | 4557(1) | 22(1) |



|       |         |          |         |       |
|-------|---------|----------|---------|-------|
| C(31) | 2254(2) | 11431(2) | 4172(1) | 24(1) |
| C(32) | 2331(2) | 10028(2) | 3718(1) | 23(1) |
| C(33) | 4935(2) | 10508(2) | 4038(1) | 17(1) |

**Supplementary Table 21:** Bond lengths [Å] and angles [°] for **4cp**.

|             |            |                |           |
|-------------|------------|----------------|-----------|
| S(1)-O(1)   | 1.4298(12) | C(15)-H(15A)   | 0.9900    |
| S(1)-O(2)   | 1.4311(12) | C(15)-H(15B)   | 0.9900    |
| S(1)-N(1)   | 1.6335(14) | C(16)-H(16)    | 1.0000    |
| S(1)-C(5)   | 1.7619(17) | C(16)-C(17)    | 1.536(2)  |
| O(3)-C(24)  | 1.220(2)   | C(16)-C(24)    | 1.529(2)  |
| N(1)-C(8)   | 1.421(2)   | C(17)-H(17A)   | 0.9900    |
| N(1)-C(15)  | 1.483(2)   | C(17)-H(17B)   | 0.9900    |
| N(2)-H(2)   | 0.860(17)  | C(17)-C(18)    | 1.513(2)  |
| N(2)-C(24)  | 1.357(2)   | C(18)-C(19)    | 1.396(2)  |
| N(2)-C(25)  | 1.405(2)   | C(18)-C(23)    | 1.387(2)  |
| N(3)-C(32)  | 1.319(2)   | C(19)-H(19)    | 0.9500    |
| N(3)-C(33)  | 1.361(2)   | C(19)-C(20)    | 1.392(2)  |
| C(1)-H(1A)  | 0.9800     | C(20)-H(20)    | 0.9500    |
| C(1)-H(1B)  | 0.9800     | C(20)-C(21)    | 1.379(3)  |
| C(1)-H(1C)  | 0.9800     | C(21)-H(21)    | 0.9500    |
| C(1)-C(2)   | 1.510(2)   | C(21)-C(22)    | 1.381(3)  |
| C(2)-C(3)   | 1.397(2)   | C(22)-H(22)    | 0.9500    |
| C(2)-C(7)   | 1.395(2)   | C(22)-C(23)    | 1.386(2)  |
| C(3)-H(3)   | 0.9500     | C(23)-H(23)    | 0.9500    |
| C(3)-C(4)   | 1.386(2)   | C(25)-C(26)    | 1.376(2)  |
| C(4)-H(4)   | 0.9500     | C(25)-C(33)    | 1.427(2)  |
| C(4)-C(5)   | 1.392(2)   | C(26)-H(26)    | 0.9500    |
| C(5)-C(6)   | 1.394(2)   | C(26)-C(27)    | 1.413(2)  |
| C(6)-H(6)   | 0.9500     | C(27)-H(27)    | 0.9500    |
| C(6)-C(7)   | 1.378(3)   | C(27)-C(28)    | 1.363(2)  |
| C(7)-H(7)   | 0.9500     | C(28)-H(28)    | 0.9500    |
| C(8)-C(9)   | 1.387(2)   | C(28)-C(29)    | 1.416(2)  |
| C(8)-C(13)  | 1.398(2)   | C(29)-C(30)    | 1.411(2)  |
| C(9)-H(9)   | 0.9500     | C(29)-C(33)    | 1.417(2)  |
| C(9)-C(10)  | 1.390(2)   | C(30)-H(30)    | 0.9500    |
| C(10)-H(10) | 0.9500     | C(30)-C(31)    | 1.366(2)  |
| C(10)-C(11) | 1.384(3)   | C(31)-H(31)    | 0.9500    |
| C(11)-H(11) | 0.9500     | C(31)-C(32)    | 1.408(2)  |
| C(11)-C(12) | 1.398(3)   | C(32)-H(32)    | 0.9500    |
| C(12)-H(12) | 0.9500     |                |           |
| C(12)-C(13) | 1.378(2)   | O(1)-S(1)-O(2) | 120.81(7) |
| C(13)-C(14) | 1.510(2)   | O(1)-S(1)-N(1) | 107.60(7) |
| C(14)-H(14) | 1.0000     | O(1)-S(1)-C(5) | 107.77(8) |
| C(14)-C(15) | 1.553(2)   | O(2)-S(1)-N(1) | 105.93(8) |
| C(14)-C(16) | 1.555(2)   | O(2)-S(1)-C(5) | 107.53(8) |

|                   |            |                     |            |
|-------------------|------------|---------------------|------------|
| N(1)-S(1)-C(5)    | 106.37(7)  | C(8)-C(13)-C(14)    | 110.81(14) |
| C(8)-N(1)-S(1)    | 127.08(12) | C(12)-C(13)-C(8)    | 120.18(15) |
| C(8)-N(1)-C(15)   | 110.28(13) | C(12)-C(13)-C(14)   | 129.00(15) |
| C(15)-N(1)-S(1)   | 119.82(11) | C(13)-C(14)-H(14)   | 109.1      |
| C(24)-N(2)-H(2)   | 120.0(13)  | C(13)-C(14)-C(15)   | 103.13(12) |
| C(24)-N(2)-C(25)  | 128.45(14) | C(13)-C(14)-C(16)   | 111.58(13) |
| C(25)-N(2)-H(2)   | 111.4(13)  | C(15)-C(14)-H(14)   | 109.1      |
| C(32)-N(3)-C(33)  | 117.76(14) | C(15)-C(14)-C(16)   | 114.69(13) |
| H(1A)-C(1)-H(1B)  | 109.5      | C(16)-C(14)-H(14)   | 109.1      |
| H(1A)-C(1)-H(1C)  | 109.5      | N(1)-C(15)-C(14)    | 104.97(12) |
| H(1B)-C(1)-H(1C)  | 109.5      | N(1)-C(15)-H(15A)   | 110.8      |
| C(2)-C(1)-H(1A)   | 109.5      | N(1)-C(15)-H(15B)   | 110.8      |
| C(2)-C(1)-H(1B)   | 109.5      | C(14)-C(15)-H(15A)  | 110.8      |
| C(2)-C(1)-H(1C)   | 109.5      | C(14)-C(15)-H(15B)  | 110.8      |
| C(3)-C(2)-C(1)    | 120.52(15) | H(15A)-C(15)-H(15B) | 108.8      |
| C(7)-C(2)-C(1)    | 120.93(16) | C(14)-C(16)-H(16)   | 108.5      |
| C(7)-C(2)-C(3)    | 118.54(16) | C(17)-C(16)-C(14)   | 111.98(13) |
| C(2)-C(3)-H(3)    | 119.4      | C(17)-C(16)-H(16)   | 108.5      |
| C(4)-C(3)-C(2)    | 121.22(16) | C(24)-C(16)-C(14)   | 109.09(13) |
| C(4)-C(3)-H(3)    | 119.4      | C(24)-C(16)-H(16)   | 108.5      |
| C(3)-C(4)-H(4)    | 120.5      | C(24)-C(16)-C(17)   | 110.14(14) |
| C(3)-C(4)-C(5)    | 119.01(16) | C(16)-C(17)-H(17A)  | 108.8      |
| C(5)-C(4)-H(4)    | 120.5      | C(16)-C(17)-H(17B)  | 108.8      |
| C(4)-C(5)-S(1)    | 120.46(13) | H(17A)-C(17)-H(17B) | 107.7      |
| C(4)-C(5)-C(6)    | 120.61(16) | C(18)-C(17)-C(16)   | 113.74(13) |
| C(6)-C(5)-S(1)    | 118.85(12) | C(18)-C(17)-H(17A)  | 108.8      |
| C(5)-C(6)-H(6)    | 120.3      | C(18)-C(17)-H(17B)  | 108.8      |
| C(7)-C(6)-C(5)    | 119.49(15) | C(19)-C(18)-C(17)   | 120.62(15) |
| C(7)-C(6)-H(6)    | 120.3      | C(23)-C(18)-C(17)   | 120.74(15) |
| C(2)-C(7)-H(7)    | 119.5      | C(23)-C(18)-C(19)   | 118.62(15) |
| C(6)-C(7)-C(2)    | 121.07(16) | C(18)-C(19)-H(19)   | 119.7      |
| C(6)-C(7)-H(7)    | 119.5      | C(20)-C(19)-C(18)   | 120.62(17) |
| C(9)-C(8)-N(1)    | 129.16(15) | C(20)-C(19)-H(19)   | 119.7      |
| C(9)-C(8)-C(13)   | 121.41(15) | C(19)-C(20)-H(20)   | 120.1      |
| C(13)-C(8)-N(1)   | 109.32(14) | C(21)-C(20)-C(19)   | 119.89(18) |
| C(8)-C(9)-H(9)    | 121.2      | C(21)-C(20)-H(20)   | 120.1      |
| C(8)-C(9)-C(10)   | 117.54(16) | C(20)-C(21)-H(21)   | 120.1      |
| C(10)-C(9)-H(9)   | 121.2      | C(20)-C(21)-C(22)   | 119.86(16) |
| C(9)-C(10)-H(10)  | 119.1      | C(22)-C(21)-H(21)   | 120.1      |
| C(11)-C(10)-C(9)  | 121.81(16) | C(21)-C(22)-H(22)   | 119.8      |
| C(11)-C(10)-H(10) | 119.1      | C(21)-C(22)-C(23)   | 120.44(18) |
| C(10)-C(11)-H(11) | 120.1      | C(23)-C(22)-H(22)   | 119.8      |
| C(10)-C(11)-C(12) | 119.87(16) | C(18)-C(23)-H(23)   | 119.7      |
| C(12)-C(11)-H(11) | 120.1      | C(22)-C(23)-C(18)   | 120.54(17) |
| C(11)-C(12)-H(12) | 120.4      | C(22)-C(23)-H(23)   | 119.7      |
| C(13)-C(12)-C(11) | 119.17(16) | O(3)-C(24)-N(2)     | 123.98(14) |
| C(13)-C(12)-H(12) | 120.4      | O(3)-C(24)-C(16)    | 121.15(15) |

|                   |            |
|-------------------|------------|
| N(2)-C(24)-C(16)  | 114.84(14) |
| N(2)-C(25)-C(33)  | 114.70(14) |
| C(26)-C(25)-N(2)  | 125.12(15) |
| C(26)-C(25)-C(33) | 120.18(14) |
| C(25)-C(26)-H(26) | 120.3      |
| C(25)-C(26)-C(27) | 119.48(15) |
| C(27)-C(26)-H(26) | 120.3      |
| C(26)-C(27)-H(27) | 119.1      |
| C(28)-C(27)-C(26) | 121.87(15) |
| C(28)-C(27)-H(27) | 119.1      |
| C(27)-C(28)-H(28) | 120.1      |
| C(27)-C(28)-C(29) | 119.76(15) |
| C(29)-C(28)-H(28) | 120.1      |
| C(28)-C(29)-C(33) | 119.39(15) |
| C(30)-C(29)-C(28) | 123.63(15) |
| C(30)-C(29)-C(33) | 116.98(15) |
| C(29)-C(30)-H(30) | 120.1      |
| C(31)-C(30)-C(29) | 119.80(15) |
| C(31)-C(30)-H(30) | 120.1      |
| C(30)-C(31)-H(31) | 120.6      |
| C(30)-C(31)-C(32) | 118.84(16) |
| C(32)-C(31)-H(31) | 120.6      |
| N(3)-C(32)-C(31)  | 123.65(16) |
| N(3)-C(32)-H(32)  | 118.2      |
| C(31)-C(32)-H(32) | 118.2      |
| N(3)-C(33)-C(25)  | 117.75(14) |
| N(3)-C(33)-C(29)  | 122.94(14) |
| C(29)-C(33)-C(25) | 119.31(14) |

**Supplementary Table 22:** Anisotropic displacement parameters ( $\text{\AA}^2 \times 10^3$ ) for **4cp**. The anisotropic

displacement factor exponent takes the form:  $-2\pi^2 [ h^2 a^{*2} U^{11} + \dots + 2 h k a^* b^* U^{12} ]$

|       | U11   | U22   | U33   | U23   | U13   | U12   |
|-------|-------|-------|-------|-------|-------|-------|
| S(1)  | 20(1) | 18(1) | 24(1) | 3(1)  | -3(1) | 6(1)  |
| O(1)  | 26(1) | 20(1) | 35(1) | 4(1)  | -2(1) | 9(1)  |
| O(2)  | 27(1) | 25(1) | 28(1) | 4(1)  | -6(1) | 7(1)  |
| O(3)  | 18(1) | 23(1) | 37(1) | 0(1)  | 2(1)  | 6(1)  |
| N(1)  | 21(1) | 18(1) | 22(1) | 1(1)  | 1(1)  | 5(1)  |
| N(2)  | 16(1) | 16(1) | 22(1) | 2(1)  | 0(1)  | 4(1)  |
| N(3)  | 20(1) | 19(1) | 20(1) | 5(1)  | 1(1)  | 5(1)  |
| C(1)  | 26(1) | 36(1) | 28(1) | 6(1)  | 3(1)  | 2(1)  |
| C(2)  | 16(1) | 28(1) | 27(1) | 4(1)  | 4(1)  | 6(1)  |
| C(3)  | 19(1) | 21(1) | 29(1) | 1(1)  | 1(1)  | 2(1)  |
| C(4)  | 17(1) | 23(1) | 23(1) | 0(1)  | 0(1)  | 5(1)  |
| C(5)  | 16(1) | 22(1) | 25(1) | 3(1)  | 0(1)  | 8(1)  |
| C(6)  | 22(1) | 19(1) | 29(1) | -1(1) | 0(1)  | 6(1)  |
| C(7)  | 24(1) | 29(1) | 23(1) | -1(1) | 2(1)  | 8(1)  |
| C(8)  | 20(1) | 20(1) | 17(1) | 6(1)  | 2(1)  | 2(1)  |
| C(9)  | 28(1) | 20(1) | 23(1) | 4(1)  | 4(1)  | 5(1)  |
| C(10) | 32(1) | 20(1) | 25(1) | 2(1)  | 0(1)  | -1(1) |
| C(11) | 27(1) | 28(1) | 27(1) | 7(1)  | -6(1) | -3(1) |
| C(12) | 22(1) | 28(1) | 29(1) | 13(1) | 2(1)  | 6(1)  |
| C(13) | 23(1) | 18(1) | 19(1) | 7(1)  | 2(1)  | 4(1)  |
| C(14) | 20(1) | 19(1) | 19(1) | 4(1)  | 3(1)  | 5(1)  |
| C(15) | 23(1) | 18(1) | 20(1) | 2(1)  | 1(1)  | 6(1)  |
| C(16) | 19(1) | 18(1) | 21(1) | 2(1)  | 1(1)  | 7(1)  |
| C(17) | 27(1) | 22(1) | 21(1) | 5(1)  | 6(1)  | 12(1) |
| C(18) | 26(1) | 22(1) | 20(1) | 4(1)  | 8(1)  | 11(1) |
| C(19) | 27(1) | 29(1) | 26(1) | 6(1)  | 5(1)  | 8(1)  |
| C(20) | 34(1) | 43(1) | 26(1) | 10(1) | 3(1)  | 18(1) |
| C(21) | 48(1) | 37(1) | 31(1) | 19(1) | 13(1) | 22(1) |
| C(22) | 39(1) | 26(1) | 36(1) | 11(1) | 15(1) | 8(1)  |
| C(23) | 28(1) | 25(1) | 27(1) | 4(1)  | 5(1)  | 9(1)  |
| C(24) | 20(1) | 18(1) | 19(1) | 4(1)  | 3(1)  | 6(1)  |
| C(25) | 20(1) | 15(1) | 16(1) | 4(1)  | 2(1)  | 5(1)  |
| C(26) | 19(1) | 21(1) | 21(1) | 5(1)  | 0(1)  | 5(1)  |
| C(27) | 23(1) | 19(1) | 21(1) | 3(1)  | -1(1) | 0(1)  |
| C(28) | 30(1) | 15(1) | 18(1) | 2(1)  | 0(1)  | 4(1)  |
| C(29) | 26(1) | 18(1) | 15(1) | 6(1)  | 3(1)  | 7(1)  |
| C(30) | 30(1) | 20(1) | 20(1) | 5(1)  | 5(1)  | 12(1) |
| C(31) | 24(1) | 29(1) | 26(1) | 10(1) | 4(1)  | 14(1) |
| C(32) | 16(1) | 28(1) | 26(1) | 7(1)  | 0(1)  | 6(1)  |
| C(33) | 19(1) | 17(1) | 15(1) | 6(1)  | 2(1)  | 4(1)  |

**Supplementary Table 23:** Hydrogen coordinates ( $\times 10^4$ ) and isotropic displacement parameters ( $\text{\AA}^2 \times 10^3$ ) for **4cp**.

|        | x        | y        | z        | U(eq) |
|--------|----------|----------|----------|-------|
| H(2)   | 5210(20) | 8190(20) | 3286(12) | 22    |
| H(1A)  | 11511    | 7669     | 320      | 46    |
| H(1B)  | 12528    | 6586     | -129     | 46    |
| H(1C)  | 13306    | 7992     | 594      | 46    |
| H(3)   | 12823    | 7968     | 2082     | 29    |
| H(4)   | 12100    | 6614     | 3111     | 26    |
| H(6)   | 10274    | 3001     | 1268     | 29    |
| H(7)   | 11034    | 4359     | 251      | 31    |
| H(9)   | 7818     | 915      | 2213     | 28    |
| H(10)  | 5349     | -253     | 1582     | 33    |
| H(11)  | 3352     | 943      | 1732     | 35    |
| H(12)  | 3821     | 3409     | 2474     | 30    |
| H(14)  | 5988     | 5379     | 3742     | 23    |
| H(15A) | 9078     | 6043     | 3521     | 25    |
| H(15B) | 8276     | 5253     | 4244     | 25    |
| H(16)  | 5598     | 6179     | 2482     | 23    |
| H(17A) | 8767     | 6193     | 2146     | 27    |
| H(17B) | 7332     | 4997     | 1628     | 27    |
| H(19)  | 5592     | 5832     | 704      | 33    |
| H(20)  | 5597     | 7276     | -287     | 39    |
| H(21)  | 7594     | 9363     | -231     | 42    |
| H(22)  | 9586     | 10001    | 809      | 40    |
| H(23)  | 9627     | 8536     | 1776     | 32    |
| H(26)  | 8611     | 10571    | 4307     | 25    |
| H(27)  | 8642     | 12934    | 5103     | 26    |
| H(28)  | 6435     | 13796    | 5237     | 26    |
| H(30)  | 3553     | 13345    | 4855     | 27    |
| H(31)  | 1298     | 11710    | 4209     | 29    |
| H(32)  | 1404     | 9374     | 3452     | 27    |

Disorder:

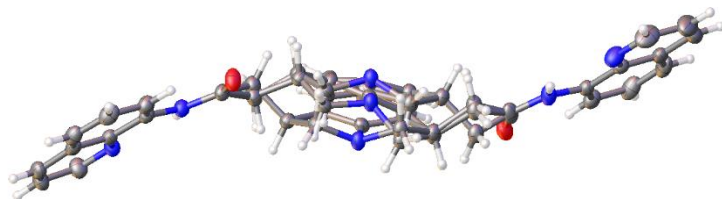

cis:

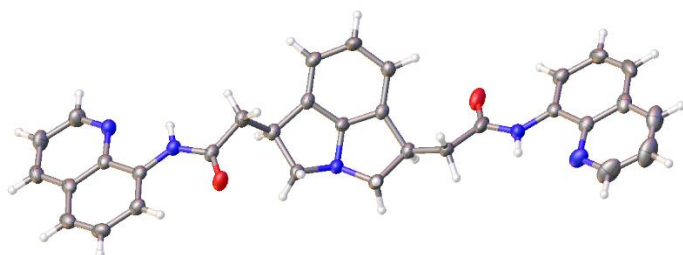

trans:

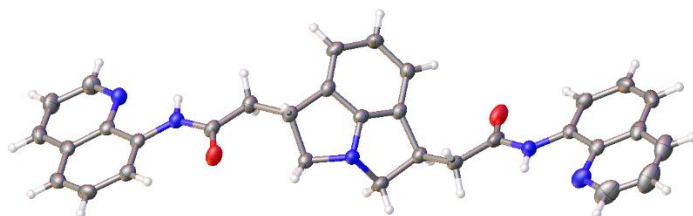

**Supplementary Figure 19:** Crystal data and structure refinement for **3bn'**.

The single crystal X-ray diffraction studies were carried out on a Bruker Smart APEX II CCD diffractometer equipped with Cu K $_{\alpha}$  radiation ( $\lambda = 1.54178 \text{ \AA}$ ).

Crystals of the subject compound were used as received. A 0.22 x 0.16 x 0.14 mm piece of a colorless crystal was mounted on a Cryoloop with Paratone oil. Data were collected in a nitrogen gas stream at 100(2) K using  $\phi$  and  $\omega$  scans. Crystal-to-detector distance was 40 mm and exposure time was 1, 2, or 5 seconds depending on the  $2\theta$  range per frame using a scan width of  $1.25^{\circ}$ . Data collection was 98.2 % complete to  $67.679^{\circ}$  in  $\theta$ . A total of 16276 reflections were collected covering the indices,  $-40 \leq h \leq 39$ ,  $-7 \leq k \leq 7$ ,  $-39 \leq l \leq 39$ . 5349 reflections were found to be

symmetry independent, with a  $R_{\text{int}}$  of 0.0349. Indexing and unit cell refinement indicated a C-centered, **Monoclinic** lattice. The space group was found to be  $C2/c$ . The data were integrated using the Bruker SAINT Software program and scaled using the SADABS software program. Solution by direct methods (SHELXT) produced a complete phasing model consistent with the proposed structure.

All nonhydrogen atoms were refined anisotropically by full-matrix least-squares (SHELXL-2014). All carbon bonded hydrogen atoms were placed using a riding model. Their positions were constrained relative to their parent atom using the appropriate HFIX command in SHELXL-2014. Crystallographic data are summarized in Table 1.

*Notes:* Great data! There is one copy of the molecule in the asymmetric unit and one molecule of DCM. Both *cis* and *trans* isomers are in the structure with a ratio of ~55/45. The DCM is also positionally disordered between two positions. The chemical formula of the molecule is  $C_{33}H_{27}N_5O_2$ .

**Supplementary Table 24.** Crystal data and structure refinement for **3bn'**.

|                      |                            |                                |
|----------------------|----------------------------|--------------------------------|
| Identification code  | prelim_a                   |                                |
| Empirical formula    | C33 H29 Cl2 N5 O2          |                                |
| Formula weight       | 598.51                     |                                |
| Temperature          | 100.0 K                    |                                |
| Wavelength           | 1.54178 Å                  |                                |
| Crystal system       | Monoclinic                 |                                |
| Space group          | C 1 2/c 1                  |                                |
| Unit cell dimensions | a = 32.8993(5) Å           | $\alpha = 90^\circ$ .          |
|                      | b = 6.09050(10) Å          | $\beta = 117.2380(10)^\circ$ . |
|                      | c = 32.4083(5) Å           | $\gamma = 90^\circ$ .          |
| Volume               | 5773.68(16) Å <sup>3</sup> |                                |
| Z                    | 8                          |                                |

|                                   |                                             |
|-----------------------------------|---------------------------------------------|
| Density (calculated)              | 1.377 Mg/m <sup>3</sup>                     |
| Absorption coefficient            | 2.347 mm <sup>-1</sup>                      |
| F(000)                            | 2496                                        |
| Crystal size                      | 0.22 x 0.16 x 0.14 mm <sup>3</sup>          |
| Theta range for data collection   | 3.021 to 70.100°.                           |
| Index ranges                      | -40<=h<=39, -7<=k<=7, -39<=l<=39            |
| Reflections collected             | 16276                                       |
| Independent reflections           | 5349 [R(int) = 0.0349]                      |
| Completeness to theta = 67.679°   | 98.2 %                                      |
| Absorption correction             | None                                        |
| Max. and min. transmission        | 0.5220 and 0.4374                           |
| Refinement method                 | Full-matrix least-squares on F <sup>2</sup> |
| Data / restraints / parameters    | 5349 / 127 / 482                            |
| Goodness-of-fit on F <sup>2</sup> | 1.126                                       |
| Final R indices [I>2sigma(I)]     | R1 = 0.0668, wR2 = 0.1434                   |
| R indices (all data)              | R1 = 0.0774, wR2 = 0.1483                   |
| Extinction coefficient            | n/a                                         |
| Largest diff. peak and hole       | 0.438 and -0.311 e.Å <sup>-3</sup>          |



**Supplementary Table 25.** Atomic coordinates ( $\times 10^4$ ) and equivalent isotropic displacement parameters ( $\text{\AA}^2 \times 10^3$ )

for **3bn'**. U(eq) is defined as one third of the trace of the orthogonalized  $U_{ij}$  tensor.

---

|       | x       | y        | z       | U(eq) |
|-------|---------|----------|---------|-------|
| O(1)  | 4195(1) | 3295(4)  | 6108(1) | 39(1) |
| O(2)  | 3057(1) | 12028(4) | 3435(1) | 46(1) |
| N(1)  | 2987(1) | -2(4)    | 6379(1) | 31(1) |
| N(2)  | 3579(1) | 2220(4)  | 6199(1) | 27(1) |
| N(4)  | 3721(1) | 13071(4) | 3447(1) | 33(1) |
| N(5)  | 4368(1) | 14983(5) | 3305(1) | 40(1) |
| C(1)  | 2682(1) | -1114(5) | 6452(1) | 38(1) |
| C(2)  | 2774(1) | -3122(5) | 6694(1) | 40(1) |
| C(3)  | 3202(1) | -3978(5) | 6870(1) | 35(1) |
| C(4)  | 3548(1) | -2840(4) | 6811(1) | 30(1) |
| C(5)  | 4004(1) | -3601(5) | 6985(1) | 35(1) |
| C(6)  | 4308(1) | -2433(5) | 6899(1) | 37(1) |
| C(7)  | 4184(1) | -460(5)  | 6638(1) | 32(1) |
| C(8)  | 3746(1) | 330(4)   | 6469(1) | 26(1) |
| C(9)  | 3418(1) | -853(4)  | 6557(1) | 26(1) |
| C(10) | 3796(1) | 3548(5)  | 6026(1) | 29(1) |
| C(23) | 3469(1) | 11792(5) | 3583(1) | 39(1) |
| C(24) | 3589(1) | 14926(4) | 3162(1) | 26(1) |
| C(25) | 3158(1) | 15822(5) | 2954(1) | 34(1) |
| C(26) | 3076(1) | 17769(5) | 2695(1) | 42(1) |
| C(27) | 3412(1) | 18804(5) | 2641(1) | 43(1) |
| C(28) | 3858(1) | 17916(5) | 2839(1) | 36(1) |
| C(29) | 3949(1) | 15945(5) | 3102(1) | 28(1) |
| C(30) | 4223(1) | 18850(6) | 2786(1) | 52(1) |
| C(31) | 4632(1) | 17876(8) | 2978(1) | 62(1) |
| C(32) | 4700(1) | 15956(8) | 3245(1) | 57(1) |
| N(3)  | 3869(2) | 7090(8)  | 4828(2) | 28(1) |
| C(11) | 3485(7) | 5220(30) | 5687(7) | 30(2) |

---

|        |          |           |          |       |
|--------|----------|-----------|----------|-------|
| C(12)  | 3731(3)  | 6699(14)  | 5490(2)  | 28(1) |
| C(13)  | 3412(3)  | 8430(19)  | 5154(3)  | 28(1) |
| C(14)  | 3034(4)  | 9620(20)  | 5097(4)  | 31(2) |
| C(15)  | 2777(6)  | 10710(30) | 4672(5)  | 36(2) |
| C(16)  | 2887(5)  | 10640(30) | 4302(5)  | 29(3) |
| C(17)  | 3266(6)  | 9400(30)  | 4360(5)  | 27(2) |
| C(18)  | 3465(5)  | 8460(20)  | 4050(4)  | 29(1) |
| C(19)  | 3737(3)  | 6449(17)  | 4342(3)  | 30(2) |
| C(20)  | 3909(3)  | 5454(10)  | 5182(2)  | 26(2) |
| C(21)  | 3509(2)  | 8437(10)  | 4781(2)  | 26(1) |
| C(22)  | 3766(9)  | 10010(30) | 3942(9)  | 30(2) |
| N(3A)  | 3553(2)  | 5711(9)   | 4629(2)  | 28(1) |
| C(11A) | 3543(7)  | 5610(30)  | 5772(4)  | 30(2) |
| C(12A) | 3359(2)  | 5302(11)  | 5249(2)  | 28(1) |
| C(13A) | 3141(2)  | 7386(11)  | 4971(2)  | 28(1) |
| C(14A) | 2875(3)  | 9112(14)  | 4975(4)  | 31(2) |
| C(15A) | 2789(7)  | 10850(30) | 4658(6)  | 36(2) |
| C(16A) | 2972(6)  | 10920(30) | 4342(6)  | 29(3) |
| C(17A) | 3229(8)  | 9120(30)  | 4330(6)  | 27(2) |
| C(18A) | 3513(6)  | 8440(30)  | 4084(5)  | 29(1) |
| C(19A) | 3838(5)  | 6710(20)  | 4432(4)  | 30(2) |
| C(20A) | 3736(2)  | 4778(12)  | 5096(2)  | 26(2) |
| C(21A) | 3281(2)  | 7456(10)  | 4628(2)  | 26(1) |
| C(22A) | 3774(10) | 10260(30) | 3986(11) | 30(2) |
| N(3B)  | 3972(4)  | 8036(19)  | 4989(4)  | 28(1) |
| C(11B) | 3462(17) | 5230(60)  | 5670(20) | 30(2) |
| C(12B) | 3698(8)  | 7010(40)  | 5525(6)  | 28(1) |
| C(13B) | 3358(8)  | 8580(50)  | 5158(8)  | 28(1) |
| C(14B) | 2959(7)  | 9660(50)  | 5060(8)  | 31(2) |
| C(15B) | 2779(15) | 11110(90) | 4678(15) | 36(2) |
| C(16B) | 2960(7)  | 11290(50) | 4362(8)  | 29(3) |
| C(17B) | 3375(4)  | 10250(20) | 4473(4)  | 27(2) |
| C(18B) | 3706(4)  | 9930(20)  | 4265(3)  | 29(1) |
| C(19B) | 3975(5)  | 7870(20)  | 4535(4)  | 30(2) |
| C(20B) | 3970(6)  | 6130(20)  | 5269(5)  | 26(2) |
| C(21B) | 3563(4)  | 9120(20)  | 4880(4)  | 26(1) |

|        |         |           |         |       |
|--------|---------|-----------|---------|-------|
| C(22B) | 3505(5) | 9640(20)  | 3743(3) | 30(2) |
| Cl(1)  | 5207(3) | 7524(14)  | 4856(3) | 82(2) |
| Cl(2)  | 4876(5) | 10640(20) | 4094(4) | 97(3) |
| C(1S') | 5179(7) | 8190(30)  | 4316(5) | 58(1) |
| Cl(1S) | 4958(1) | 11359(4)  | 4042(1) | 58(1) |
| Cl(2S) | 4987(1) | 7528(3)   | 4603(2) | 92(1) |
| C(1S)  | 5310(2) | 9316(9)   | 4435(2) | 58(1) |

**Supplementary Table 26.** Bond lengths [Å] and angles [°] for **3bn'**.

|            |          |              |           |
|------------|----------|--------------|-----------|
| O(1)-C(10) | 1.222(3) | C(8)-C(9)    | 1.432(4)  |
| O(2)-C(23) | 1.222(4) | C(10)-C(11)  | 1.506(17) |
| N(1)-C(1)  | 1.318(4) | C(10)-C(11A) | 1.523(17) |
| N(1)-C(9)  | 1.364(4) | C(10)-C(11B) | 1.56(4)   |
| N(2)-H(2)  | 0.8800   | C(23)-C(22)  | 1.56(2)   |
| N(2)-C(8)  | 1.398(3) | C(23)-C(22A) | 1.54(3)   |
| N(2)-C(10) | 1.359(3) | C(23)-C(22B) | 1.394(14) |
| N(4)-H(4)  | 0.8800   | C(24)-C(25)  | 1.372(4)  |
| N(4)-C(23) | 1.350(4) | C(24)-C(29)  | 1.429(4)  |
| N(4)-C(24) | 1.398(3) | C(25)-H(25)  | 0.9500    |
| N(5)-C(29) | 1.358(4) | C(25)-C(26)  | 1.406(4)  |
| N(5)-C(32) | 1.333(4) | C(26)-H(26)  | 0.9500    |
| C(1)-H(1)  | 0.9500   | C(26)-C(27)  | 1.354(5)  |
| C(1)-C(2)  | 1.407(4) | C(27)-H(27)  | 0.9500    |
| C(2)-H(2A) | 0.9500   | C(27)-C(28)  | 1.413(5)  |
| C(2)-C(3)  | 1.357(4) | C(28)-C(29)  | 1.422(4)  |
| C(3)-H(3)  | 0.9500   | C(28)-C(30)  | 1.408(4)  |
| C(3)-C(4)  | 1.418(4) | C(30)-H(30)  | 0.9500    |
| C(4)-C(5)  | 1.419(4) | C(30)-C(31)  | 1.336(6)  |
| C(4)-C(9)  | 1.415(4) | C(31)-H(31)  | 0.9500    |
| C(5)-H(5)  | 0.9500   | C(31)-C(32)  | 1.409(6)  |
| C(5)-C(6)  | 1.357(4) | C(32)-H(32)  | 0.9500    |
| C(6)-H(6)  | 0.9500   | N(3)-C(19)   | 1.483(9)  |
| C(6)-C(7)  | 1.418(4) | N(3)-C(20)   | 1.480(6)  |
| C(7)-H(7)  | 0.9500   | N(3)-C(21)   | 1.391(6)  |
| C(7)-C(8)  | 1.372(4) | C(11)-H(11A) | 0.9900    |

|               |           |               |           |
|---------------|-----------|---------------|-----------|
| C(11)-H(11B)  | 0.9900    | C(14A)-C(15A) | 1.411(8)  |
| C(11)-C(12)   | 1.529(10) | C(15A)-H(15A) | 0.9500    |
| C(12)-H(12)   | 1.0000    | C(15A)-C(16A) | 1.405(7)  |
| C(12)-C(13)   | 1.534(6)  | C(16A)-H(16A) | 0.9500    |
| C(12)-C(20)   | 1.565(6)  | C(16A)-C(17A) | 1.397(8)  |
| C(13)-C(14)   | 1.377(6)  | C(17A)-C(18A) | 1.536(7)  |
| C(13)-C(21)   | 1.386(6)  | C(17A)-C(21A) | 1.358(9)  |
| C(14)-H(14)   | 0.9500    | C(18A)-H(18A) | 1.0000    |
| C(14)-C(15)   | 1.410(7)  | C(18A)-C(19A) | 1.559(8)  |
| C(15)-H(15)   | 0.9500    | C(18A)-C(22A) | 1.520(7)  |
| C(15)-C(16)   | 1.404(6)  | C(19A)-H(19C) | 0.9900    |
| C(16)-H(16)   | 0.9500    | C(19A)-H(19D) | 0.9900    |
| C(16)-C(17)   | 1.397(8)  | C(20A)-H(20C) | 0.9900    |
| C(17)-C(18)   | 1.536(6)  | C(20A)-H(20D) | 0.9900    |
| C(17)-C(21)   | 1.357(9)  | C(22A)-H(22C) | 0.9900    |
| C(18)-H(18)   | 1.0000    | C(22A)-H(22D) | 0.9900    |
| C(18)-C(19)   | 1.557(7)  | N(3B)-C(19B)  | 1.480(10) |
| C(18)-C(22)   | 1.522(6)  | N(3B)-C(20B)  | 1.476(9)  |
| C(19)-H(19A)  | 0.9900    | N(3B)-C(21B)  | 1.390(8)  |
| C(19)-H(19B)  | 0.9900    | C(11B)-H(11E) | 0.9900    |
| C(20)-H(20A)  | 0.9900    | C(11B)-H(11F) | 0.9900    |
| C(20)-H(20B)  | 0.9900    | C(11B)-C(12B) | 1.527(12) |
| C(22)-H(22A)  | 0.9900    | C(12B)-H(12B) | 1.0000    |
| C(22)-H(22B)  | 0.9900    | C(12B)-C(13B) | 1.535(9)  |
| N(3A)-C(19A)  | 1.484(10) | C(12B)-C(20B) | 1.567(9)  |
| N(3A)-C(20A)  | 1.466(7)  | C(13B)-C(14B) | 1.373(8)  |
| N(3A)-C(21A)  | 1.389(7)  | C(13B)-C(21B) | 1.387(8)  |
| C(11A)-H(11C) | 0.9900    | C(14B)-H(14B) | 0.9500    |
| C(11A)-H(11D) | 0.9900    | C(14B)-C(15B) | 1.411(9)  |
| C(11A)-C(12A) | 1.526(11) | C(15B)-H(15B) | 0.9500    |
| C(12A)-H(12A) | 1.0000    | C(15B)-C(16B) | 1.406(8)  |
| C(12A)-C(13A) | 1.532(7)  | C(16B)-H(16B) | 0.9500    |
| C(12A)-C(20A) | 1.565(7)  | C(16B)-C(17B) | 1.395(9)  |
| C(13A)-C(14A) | 1.371(7)  | C(17B)-C(18B) | 1.533(8)  |
| C(13A)-C(21A) | 1.384(7)  | C(17B)-C(21B) | 1.361(10) |
| C(14A)-H(14A) | 0.9500    | C(18B)-H(18B) | 1.0000    |

|                  |          |                   |           |
|------------------|----------|-------------------|-----------|
| C(18B)-C(19B)    | 1.556(9) | C(9)-C(4)-C(5)    | 119.6(3)  |
| C(18B)-C(22B)    | 1.521(9) | C(4)-C(5)-H(5)    | 120.2     |
| C(19B)-H(19E)    | 0.9900   | C(6)-C(5)-C(4)    | 119.6(3)  |
| C(19B)-H(19F)    | 0.9900   | C(6)-C(5)-H(5)    | 120.2     |
| C(20B)-H(20E)    | 0.9900   | C(5)-C(6)-H(6)    | 119.1     |
| C(20B)-H(20F)    | 0.9900   | C(5)-C(6)-C(7)    | 121.8(3)  |
| C(22B)-H(22E)    | 0.9900   | C(7)-C(6)-H(6)    | 119.1     |
| C(22B)-H(22F)    | 0.9900   | C(6)-C(7)-H(7)    | 120.0     |
| Cl(1)-C(1S')     | 1.760(8) | C(8)-C(7)-C(6)    | 120.0(3)  |
| Cl(2)-C(1S')     | 1.751(8) | C(8)-C(7)-H(7)    | 120.0     |
| C(1S')-H(1SA)    | 0.9900   | N(2)-C(8)-C(9)    | 115.0(2)  |
| C(1S')-H(1SB)    | 0.9900   | C(7)-C(8)-N(2)    | 125.3(2)  |
| Cl(1S)-C(1S)     | 1.777(4) | C(7)-C(8)-C(9)    | 119.6(2)  |
| Cl(2S)-C(1S)     | 1.772(5) | N(1)-C(9)-C(4)    | 123.4(2)  |
| C(1S)-H(1SC)     | 0.9900   | N(1)-C(9)-C(8)    | 117.2(2)  |
| C(1S)-H(1SD)     | 0.9900   | C(4)-C(9)-C(8)    | 119.4(2)  |
|                  |          | O(1)-C(10)-N(2)   | 123.3(3)  |
| C(1)-N(1)-C(9)   | 117.1(2) | O(1)-C(10)-C(11)  | 123.2(5)  |
| C(8)-N(2)-H(2)   | 115.9    | O(1)-C(10)-C(11A) | 119.3(8)  |
| C(10)-N(2)-H(2)  | 115.9    | O(1)-C(10)-C(11B) | 124.4(9)  |
| C(10)-N(2)-C(8)  | 128.3(2) | N(2)-C(10)-C(11)  | 113.3(6)  |
| C(23)-N(4)-H(4)  | 115.4    | N(2)-C(10)-C(11A) | 116.9(7)  |
| C(23)-N(4)-C(24) | 129.2(3) | N(2)-C(10)-C(11B) | 111.9(11) |
| C(24)-N(4)-H(4)  | 115.4    | O(2)-C(23)-N(4)   | 122.7(3)  |
| C(32)-N(5)-C(29) | 116.9(3) | O(2)-C(23)-C(22)  | 125.3(7)  |
| N(1)-C(1)-H(1)   | 118.0    | O(2)-C(23)-C(22A) | 125.3(8)  |
| N(1)-C(1)-C(2)   | 124.0(3) | O(2)-C(23)-C(22B) | 98.5(7)   |
| C(2)-C(1)-H(1)   | 118.0    | N(4)-C(23)-C(22)  | 112.0(7)  |
| C(1)-C(2)-H(2A)  | 120.5    | N(4)-C(23)-C(22A) | 111.6(8)  |
| C(3)-C(2)-C(1)   | 119.1(3) | N(4)-C(23)-C(22B) | 134.6(6)  |
| C(3)-C(2)-H(2A)  | 120.5    | N(4)-C(24)-C(29)  | 114.6(2)  |
| C(2)-C(3)-H(3)   | 120.1    | C(25)-C(24)-N(4)  | 125.7(2)  |
| C(2)-C(3)-C(4)   | 119.7(3) | C(25)-C(24)-C(29) | 119.7(2)  |
| C(4)-C(3)-H(3)   | 120.1    | C(24)-C(25)-H(25) | 120.0     |
| C(3)-C(4)-C(5)   | 123.7(3) | C(24)-C(25)-C(26) | 120.1(3)  |
| C(9)-C(4)-C(3)   | 116.7(3) | C(26)-C(25)-H(25) | 120.0     |

|                     |           |                     |          |
|---------------------|-----------|---------------------|----------|
| C(25)-C(26)-H(26)   | 119.2     | C(14)-C(13)-C(12)   | 137.7(5) |
| C(27)-C(26)-C(25)   | 121.7(3)  | C(14)-C(13)-C(21)   | 115.9(5) |
| C(27)-C(26)-H(26)   | 119.2     | C(21)-C(13)-C(12)   | 105.4(4) |
| C(26)-C(27)-H(27)   | 119.9     | C(13)-C(14)-H(14)   | 120.6    |
| C(26)-C(27)-C(28)   | 120.2(3)  | C(13)-C(14)-C(15)   | 118.7(6) |
| C(28)-C(27)-H(27)   | 119.9     | C(15)-C(14)-H(14)   | 120.6    |
| C(27)-C(28)-C(29)   | 119.1(3)  | C(14)-C(15)-H(15)   | 118.5    |
| C(30)-C(28)-C(27)   | 123.8(3)  | C(16)-C(15)-C(14)   | 123.1(7) |
| C(30)-C(28)-C(29)   | 117.2(3)  | C(16)-C(15)-H(15)   | 118.5    |
| N(5)-C(29)-C(24)    | 117.8(2)  | C(15)-C(16)-H(16)   | 121.1    |
| N(5)-C(29)-C(28)    | 123.0(3)  | C(17)-C(16)-C(15)   | 117.8(7) |
| C(28)-C(29)-C(24)   | 119.2(3)  | C(17)-C(16)-H(16)   | 121.1    |
| C(28)-C(30)-H(30)   | 120.1     | C(16)-C(17)-C(18)   | 137.1(9) |
| C(31)-C(30)-C(28)   | 119.8(3)  | C(21)-C(17)-C(16)   | 116.6(6) |
| C(31)-C(30)-H(30)   | 120.1     | C(21)-C(17)-C(18)   | 105.5(5) |
| C(30)-C(31)-H(31)   | 120.1     | C(17)-C(18)-H(18)   | 109.1    |
| C(30)-C(31)-C(32)   | 119.8(3)  | C(17)-C(18)-C(19)   | 101.1(5) |
| C(32)-C(31)-H(31)   | 120.1     | C(19)-C(18)-H(18)   | 109.1    |
| N(5)-C(32)-C(31)    | 123.4(3)  | C(22)-C(18)-C(17)   | 116.0(8) |
| N(5)-C(32)-H(32)    | 118.3     | C(22)-C(18)-H(18)   | 109.1    |
| C(31)-C(32)-H(32)   | 118.3     | C(22)-C(18)-C(19)   | 111.9(7) |
| C(20)-N(3)-C(19)    | 121.8(6)  | N(3)-C(19)-C(18)    | 104.2(7) |
| C(21)-N(3)-C(19)    | 102.6(5)  | N(3)-C(19)-H(19A)   | 110.9    |
| C(21)-N(3)-C(20)    | 104.6(4)  | N(3)-C(19)-H(19B)   | 110.9    |
| C(10)-C(11)-H(11A)  | 109.0     | C(18)-C(19)-H(19A)  | 110.9    |
| C(10)-C(11)-H(11B)  | 109.0     | C(18)-C(19)-H(19B)  | 110.9    |
| C(10)-C(11)-C(12)   | 113.0(11) | H(19A)-C(19)-H(19B) | 108.9    |
| H(11A)-C(11)-H(11B) | 107.8     | N(3)-C(20)-C(12)    | 104.0(4) |
| C(12)-C(11)-H(11A)  | 109.0     | N(3)-C(20)-H(20A)   | 111.0    |
| C(12)-C(11)-H(11B)  | 109.0     | N(3)-C(20)-H(20B)   | 111.0    |
| C(11)-C(12)-H(12)   | 109.3     | C(12)-C(20)-H(20A)  | 111.0    |
| C(11)-C(12)-C(13)   | 112.3(6)  | C(12)-C(20)-H(20B)  | 111.0    |
| C(11)-C(12)-C(20)   | 113.9(7)  | H(20A)-C(20)-H(20B) | 109.0    |
| C(13)-C(12)-H(12)   | 109.3     | C(13)-C(21)-N(3)    | 115.3(4) |
| C(13)-C(12)-C(20)   | 102.5(4)  | C(17)-C(21)-N(3)    | 116.4(5) |
| C(20)-C(12)-H(12)   | 109.3     | C(17)-C(21)-C(13)   | 127.8(5) |

|                      |           |                      |           |
|----------------------|-----------|----------------------|-----------|
| C(23)-C(22)-H(22A)   | 109.6     | C(17A)-C(18A)-H(18A) | 109.0     |
| C(23)-C(22)-H(22B)   | 109.6     | C(17A)-C(18A)-C(19A) | 100.8(6)  |
| C(18)-C(22)-C(23)    | 110.5(14) | C(19A)-C(18A)-H(18A) | 109.0     |
| C(18)-C(22)-H(22A)   | 109.6     | C(22A)-C(18A)-C(17A) | 116.5(9)  |
| C(18)-C(22)-H(22B)   | 109.6     | C(22A)-C(18A)-H(18A) | 109.0     |
| H(22A)-C(22)-H(22B)  | 108.1     | C(22A)-C(18A)-C(19A) | 112.2(9)  |
| C(20A)-N(3A)-C(19A)  | 124.2(7)  | N(3A)-C(19A)-C(18A)  | 103.2(7)  |
| C(21A)-N(3A)-C(19A)  | 102.8(6)  | N(3A)-C(19A)-H(19C)  | 111.1     |
| C(21A)-N(3A)-C(20A)  | 104.9(5)  | N(3A)-C(19A)-H(19D)  | 111.1     |
| C(10)-C(11A)-H(11C)  | 109.7     | C(18A)-C(19A)-H(19C) | 111.1     |
| C(10)-C(11A)-H(11D)  | 109.7     | C(18A)-C(19A)-H(19D) | 111.1     |
| C(10)-C(11A)-C(12A)  | 109.9(11) | H(19C)-C(19A)-H(19D) | 109.1     |
| H(11C)-C(11A)-H(11D) | 108.2     | N(3A)-C(20A)-C(12A)  | 103.8(5)  |
| C(12A)-C(11A)-H(11C) | 109.7     | N(3A)-C(20A)-H(20C)  | 111.0     |
| C(12A)-C(11A)-H(11D) | 109.7     | N(3A)-C(20A)-H(20D)  | 111.0     |
| C(11A)-C(12A)-H(12A) | 109.1     | C(12A)-C(20A)-H(20C) | 111.0     |
| C(11A)-C(12A)-C(13A) | 113.2(8)  | C(12A)-C(20A)-H(20D) | 111.0     |
| C(11A)-C(12A)-C(20A) | 114.0(8)  | H(20C)-C(20A)-H(20D) | 109.0     |
| C(13A)-C(12A)-H(12A) | 109.1     | C(13A)-C(21A)-N(3A)  | 115.2(5)  |
| C(13A)-C(12A)-C(20A) | 101.9(5)  | C(17A)-C(21A)-N(3A)  | 116.3(5)  |
| C(20A)-C(12A)-H(12A) | 109.1     | C(17A)-C(21A)-C(13A) | 127.9(6)  |
| C(14A)-C(13A)-C(12A) | 139.3(6)  | C(23)-C(22A)-H(22C)  | 108.8     |
| C(14A)-C(13A)-C(21A) | 115.6(6)  | C(23)-C(22A)-H(22D)  | 108.8     |
| C(21A)-C(13A)-C(12A) | 105.1(5)  | C(18A)-C(22A)-C(23)  | 114.0(17) |
| C(13A)-C(14A)-H(14A) | 120.5     | C(18A)-C(22A)-H(22C) | 108.8     |
| C(13A)-C(14A)-C(15A) | 119.0(7)  | C(18A)-C(22A)-H(22D) | 108.8     |
| C(15A)-C(14A)-H(14A) | 120.5     | H(22C)-C(22A)-H(22D) | 107.6     |
| C(14A)-C(15A)-H(15A) | 118.5     | C(20B)-N(3B)-C(19B)  | 124.1(10) |
| C(16A)-C(15A)-C(14A) | 122.9(8)  | C(21B)-N(3B)-C(19B)  | 103.2(7)  |
| C(16A)-C(15A)-H(15A) | 118.5     | C(21B)-N(3B)-C(20B)  | 104.6(7)  |
| C(15A)-C(16A)-H(16A) | 121.2     | C(10)-C(11B)-H(11E)  | 108.7     |
| C(17A)-C(16A)-C(15A) | 117.6(8)  | C(10)-C(11B)-H(11F)  | 108.7     |
| C(17A)-C(16A)-H(16A) | 121.2     | H(11E)-C(11B)-H(11F) | 107.6     |
| C(16A)-C(17A)-C(18A) | 138.3(8)  | C(12B)-C(11B)-C(10)  | 114(3)    |
| C(21A)-C(17A)-C(16A) | 116.5(7)  | C(12B)-C(11B)-H(11E) | 108.7     |
| C(21A)-C(17A)-C(18A) | 105.0(6)  | C(12B)-C(11B)-H(11F) | 108.7     |

|                      |           |                      |          |
|----------------------|-----------|----------------------|----------|
| C(11B)-C(12B)-H(12B) | 109.5     | C(12B)-C(20B)-H(20E) | 111.2    |
| C(11B)-C(12B)-C(13B) | 112.7(12) | C(12B)-C(20B)-H(20F) | 111.2    |
| C(11B)-C(12B)-C(20B) | 114.1(12) | H(20E)-C(20B)-H(20F) | 109.2    |
| C(13B)-C(12B)-H(12B) | 109.5     | C(13B)-C(21B)-N(3B)  | 115.1(7) |
| C(13B)-C(12B)-C(20B) | 101.1(7)  | C(17B)-C(21B)-N(3B)  | 116.3(7) |
| C(20B)-C(12B)-H(12B) | 109.5     | C(17B)-C(21B)-C(13B) | 127.4(8) |
| C(14B)-C(13B)-C(12B) | 139.3(8)  | C(23)-C(22B)-C(18B)  | 102.9(9) |
| C(14B)-C(13B)-C(21B) | 115.8(8)  | C(23)-C(22B)-H(22E)  | 111.2    |
| C(21B)-C(13B)-C(12B) | 104.6(7)  | C(23)-C(22B)-H(22F)  | 111.2    |
| C(13B)-C(14B)-H(14B) | 120.9     | C(18B)-C(22B)-H(22E) | 111.2    |
| C(13B)-C(14B)-C(15B) | 118.3(9)  | C(18B)-C(22B)-H(22F) | 111.2    |
| C(15B)-C(14B)-H(14B) | 120.9     | H(22E)-C(22B)-H(22F) | 109.1    |
| C(14B)-C(15B)-H(15B) | 118.6     | Cl(1)-C(1S')-H(1SA)  | 109.3    |
| C(16B)-C(15B)-C(14B) | 122.9(10) | Cl(1)-C(1S')-H(1SB)  | 109.3    |
| C(16B)-C(15B)-H(15B) | 118.6     | Cl(2)-C(1S')-Cl(1)   | 111.4(8) |
| C(15B)-C(16B)-H(16B) | 121.1     | Cl(2)-C(1S')-H(1SA)  | 109.3    |
| C(17B)-C(16B)-C(15B) | 117.8(10) | Cl(2)-C(1S')-H(1SB)  | 109.3    |
| C(17B)-C(16B)-H(16B) | 121.1     | H(1SA)-C(1S')-H(1SB) | 108.0    |
| C(16B)-C(17B)-C(18B) | 138.7(9)  | Cl(1S)-C(1S)-H(1SC)  | 109.3    |
| C(21B)-C(17B)-C(16B) | 116.0(8)  | Cl(1S)-C(1S)-H(1SD)  | 109.3    |
| C(21B)-C(17B)-C(18B) | 105.2(7)  | Cl(2S)-C(1S)-Cl(1S)  | 111.5(3) |
| C(17B)-C(18B)-H(18B) | 108.4     | Cl(2S)-C(1S)-H(1SC)  | 109.3    |
| C(17B)-C(18B)-C(19B) | 101.0(7)  | Cl(2S)-C(1S)-H(1SD)  | 109.3    |
| C(19B)-C(18B)-H(18B) | 108.4     | H(1SC)-C(1S)-H(1SD)  | 108.0    |
| C(22B)-C(18B)-C(17B) | 118.0(9)  |                      |          |
| C(22B)-C(18B)-H(18B) | 108.4     |                      |          |
| C(22B)-C(18B)-C(19B) | 112.2(9)  |                      |          |
| N(3B)-C(19B)-C(18B)  | 103.9(7)  |                      |          |
| N(3B)-C(19B)-H(19E)  | 111.0     |                      |          |
| N(3B)-C(19B)-H(19F)  | 111.0     |                      |          |
| C(18B)-C(19B)-H(19E) | 111.0     |                      |          |
| C(18B)-C(19B)-H(19F) | 111.0     |                      |          |
| H(19E)-C(19B)-H(19F) | 109.0     |                      |          |
| N(3B)-C(20B)-C(12B)  | 102.6(8)  |                      |          |
| N(3B)-C(20B)-H(20E)  | 111.2     |                      |          |
| N(3B)-C(20B)-H(20F)  | 111.2     |                      |          |



Symmetry transformations used to generate equivalent atoms:

**Supplementary Table 27.** Anisotropic displacement parameters ( $\text{\AA}^2 \times 10^3$ ) for Engle271. The anisotropic

displacement factor exponent takes the form:  $-2\pi^2 [ h^2 a^{*2} U^{11} + \dots + 2 h k a^* b^* U^{12} ]$

|       | U11   | U22   | U33   | U23   | U13   | U12    |
|-------|-------|-------|-------|-------|-------|--------|
| O(1)  | 30(1) | 53(1) | 39(1) | 12(1) | 19(1) | 0(1)   |
| O(2)  | 58(2) | 47(1) | 49(1) | -2(1) | 36(1) | -15(1) |
| N(1)  | 29(1) | 32(1) | 33(1) | 3(1)  | 16(1) | -1(1)  |
| N(2)  | 25(1) | 32(1) | 28(1) | 2(1)  | 14(1) | 0(1)   |
| N(4)  | 39(1) | 32(1) | 36(1) | 8(1)  | 24(1) | 7(1)   |
| N(5)  | 27(1) | 60(2) | 31(1) | 1(1)  | 12(1) | 2(1)   |
| C(1)  | 29(2) | 43(2) | 43(2) | 4(1)  | 18(1) | -2(1)  |
| C(2)  | 42(2) | 39(2) | 44(2) | 3(1)  | 24(1) | -10(1) |
| C(3)  | 46(2) | 27(1) | 33(1) | 2(1)  | 20(1) | -2(1)  |
| C(4)  | 38(2) | 28(1) | 23(1) | -2(1) | 15(1) | 1(1)   |
| C(5)  | 44(2) | 32(1) | 30(1) | 3(1)  | 17(1) | 9(1)   |
| C(6)  | 32(2) | 45(2) | 33(1) | 2(1)  | 14(1) | 14(1)  |
| C(7)  | 29(1) | 41(2) | 28(1) | 1(1)  | 15(1) | 1(1)   |
| C(8)  | 27(1) | 30(1) | 21(1) | -2(1) | 11(1) | 0(1)   |
| C(9)  | 31(1) | 27(1) | 25(1) | -4(1) | 14(1) | -2(1)  |
| C(10) | 29(1) | 36(2) | 27(1) | -1(1) | 16(1) | -5(1)  |
| C(23) | 55(2) | 34(2) | 46(2) | -1(1) | 40(2) | -1(1)  |
| C(24) | 31(1) | 25(1) | 24(1) | -2(1) | 15(1) | 0(1)   |
| C(25) | 30(1) | 44(2) | 30(1) | 0(1)  | 17(1) | 2(1)   |
| C(26) | 46(2) | 49(2) | 33(1) | 8(1)  | 19(1) | 22(2)  |
| C(27) | 70(2) | 30(2) | 33(1) | 7(1)  | 27(2) | 12(2)  |
| C(28) | 51(2) | 33(2) | 26(1) | -6(1) | 20(1) | -11(1) |
| C(29) | 28(1) | 34(1) | 22(1) | -4(1) | 11(1) | -5(1)  |
| C(30) | 65(2) | 52(2) | 43(2) | -6(2) | 26(2) | -28(2) |
| C(31) | 51(2) | 89(3) | 49(2) | -8(2) | 25(2) | -36(2) |
| C(32) | 25(2) | 95(3) | 47(2) | -9(2) | 13(1) | -11(2) |
| N(3)  | 33(2) | 27(2) | 31(2) | 4(2)  | 20(2) | 3(2)   |

|        |       |       |       |       |       |       |
|--------|-------|-------|-------|-------|-------|-------|
| C(11)  | 30(4) | 33(4) | 32(3) | 2(3)  | 17(4) | -4(3) |
| C(12)  | 29(2) | 32(3) | 24(2) | -2(2) | 13(2) | -4(2) |
| C(13)  | 30(3) | 32(2) | 26(2) | -1(2) | 15(2) | -4(2) |
| C(14)  | 32(5) | 37(3) | 28(3) | -5(2) | 18(4) | -1(3) |
| C(15)  | 35(2) | 38(5) | 42(2) | 5(2)  | 25(1) | 11(2) |
| C(16)  | 28(5) | 32(5) | 29(2) | 4(3)  | 13(3) | 1(5)  |
| C(17)  | 29(3) | 30(4) | 26(2) | -1(3) | 15(3) | -4(3) |
| C(18)  | 33(3) | 33(2) | 27(2) | 1(2)  | 17(2) | -1(2) |
| C(19)  | 34(5) | 33(3) | 31(4) | 1(3)  | 21(4) | 2(3)  |
| C(20)  | 29(4) | 25(4) | 27(3) | -2(3) | 15(3) | -4(3) |
| C(21)  | 27(2) | 24(3) | 31(3) | -3(2) | 18(2) | -4(2) |
| C(22)  | 33(2) | 31(3) | 33(4) | 3(3)  | 22(3) | 4(3)  |
| N(3A)  | 33(2) | 27(2) | 31(2) | 4(2)  | 20(2) | 3(2)  |
| C(11A) | 30(4) | 33(4) | 32(3) | 2(3)  | 17(4) | -4(3) |
| C(12A) | 29(2) | 32(3) | 24(2) | -2(2) | 13(2) | -4(2) |
| C(13A) | 30(3) | 32(2) | 26(2) | -1(2) | 15(2) | -4(2) |
| C(14A) | 32(5) | 37(3) | 28(3) | -5(2) | 18(4) | -1(3) |
| C(15A) | 35(2) | 38(5) | 42(2) | 5(2)  | 25(1) | 11(2) |
| C(16A) | 28(5) | 32(5) | 29(2) | 4(3)  | 13(3) | 1(5)  |
| C(17A) | 29(3) | 30(4) | 26(2) | -1(3) | 15(3) | -4(3) |
| C(18A) | 33(3) | 33(2) | 27(2) | 1(2)  | 17(2) | -1(2) |
| C(19A) | 34(5) | 33(3) | 31(4) | 1(3)  | 21(4) | 2(3)  |
| C(20A) | 29(4) | 25(4) | 27(3) | -2(3) | 15(3) | -4(3) |
| C(21A) | 27(2) | 24(3) | 31(3) | -3(2) | 18(2) | -4(2) |
| C(22A) | 33(2) | 31(3) | 33(4) | 3(3)  | 22(3) | 4(3)  |
| N(3B)  | 33(2) | 27(2) | 31(2) | 4(2)  | 20(2) | 3(2)  |
| C(11B) | 30(4) | 33(4) | 32(3) | 2(3)  | 17(4) | -4(3) |
| C(12B) | 29(2) | 32(3) | 24(2) | -2(2) | 13(2) | -4(2) |
| C(13B) | 30(3) | 32(2) | 26(2) | -1(2) | 15(2) | -4(2) |
| C(14B) | 32(5) | 37(3) | 28(3) | -5(2) | 18(4) | -1(3) |
| C(15B) | 35(2) | 38(5) | 42(2) | 5(2)  | 25(1) | 11(2) |
| C(16B) | 28(5) | 32(5) | 29(2) | 4(3)  | 13(3) | 1(5)  |
| C(17B) | 29(3) | 30(4) | 26(2) | -1(3) | 15(3) | -4(3) |
| C(18B) | 33(3) | 33(2) | 27(2) | 1(2)  | 17(2) | -1(2) |
| C(19B) | 34(5) | 33(3) | 31(4) | 1(3)  | 21(4) | 2(3)  |
| C(20B) | 29(4) | 25(4) | 27(3) | -2(3) | 15(3) | -4(3) |

|        |       |        |        |       |       |       |
|--------|-------|--------|--------|-------|-------|-------|
| C(21B) | 27(2) | 24(3)  | 31(3)  | -3(2) | 18(2) | -4(2) |
| C(22B) | 33(2) | 31(3)  | 33(4)  | 3(3)  | 22(3) | 4(3)  |
| Cl(1)  | 49(4) | 118(5) | 77(4)  | 15(4) | 28(4) | 14(4) |
| Cl(2)  | 95(7) | 95(7)  | 104(5) | 49(5) | 49(5) | 47(6) |
| C(1S') | 54(3) | 52(3)  | 73(3)  | 19(3) | 32(3) | 12(2) |
| Cl(1S) | 51(1) | 61(1)  | 64(1)  | 15(1) | 29(1) | 16(1) |
| Cl(2S) | 74(2) | 75(1)  | 143(3) | 41(1) | 64(2) | 16(1) |
| C(1S)  | 54(3) | 52(3)  | 73(3)  | 19(3) | 32(3) | 12(2) |

**Table S28.** Hydrogen coordinates ( $\times 10^4$ ) and isotropic displacement parameters ( $\text{\AA}^2 \times 10^{-3}$ ) for **3bn'**.

|        | x    | y     | z    | U(eq) |
|--------|------|-------|------|-------|
| H(2)   | 3298 | 2599  | 6133 | 33    |
| H(4)   | 4009 | 12680 | 3553 | 40    |
| H(1)   | 2383 | -525  | 6335 | 45    |
| H(2A)  | 2540 | -3867 | 6732 | 48    |
| H(3)   | 3269 | -5334 | 7033 | 41    |
| H(5)   | 4096 | -4921 | 7160 | 42    |
| H(6)   | 4614 | -2952 | 7017 | 44    |
| H(7)   | 4403 | 315   | 6580 | 38    |
| H(25)  | 2916 | 15126 | 2986 | 40    |
| H(26)  | 2777 | 18373 | 2554 | 51    |
| H(27)  | 3348 | 20132 | 2468 | 52    |
| H(30)  | 4178 | 20166 | 2613 | 63    |
| H(31)  | 4877 | 18477 | 2936 | 75    |
| H(32)  | 4996 | 15323 | 3388 | 68    |
| H(11A) | 3351 | 6152  | 5844 | 36    |
| H(11B) | 3231 | 4456  | 5428 | 36    |
| H(12)  | 3993 | 7451  | 5751 | 34    |
| H(14)  | 2948 | 9704  | 5339 | 37    |
| H(15)  | 2517 | 11541 | 4635 | 43    |

|        |      |       |      |    |
|--------|------|-------|------|----|
| H(16)  | 2709 | 11405 | 4021 | 35 |
| H(18)  | 3209 | 7932  | 3753 | 35 |
| H(19A) | 3544 | 5115  | 4254 | 37 |
| H(19B) | 4011 | 6169  | 4297 | 37 |
| H(20A) | 4231 | 4988  | 5369 | 32 |
| H(20B) | 3720 | 4144  | 5036 | 32 |
| H(22A) | 3940 | 9166  | 3814 | 36 |
| H(22B) | 3988 | 10736 | 4231 | 36 |
| H(11C) | 3752 | 6882  | 5877 | 36 |
| H(11D) | 3286 | 5902  | 5844 | 36 |
| H(12A) | 3127 | 4095  | 5142 | 34 |
| H(14A) | 2751 | 9135  | 5188 | 37 |
| H(15A) | 2599 | 12027 | 4659 | 43 |
| H(16A) | 2922 | 12151 | 4144 | 35 |
| H(18A) | 3308 | 7691  | 3786 | 35 |
| H(19C) | 3933 | 5592  | 4271 | 37 |
| H(19D) | 4114 | 7412  | 4677 | 37 |
| H(20C) | 4030 | 5475  | 5308 | 32 |
| H(20D) | 3782 | 3174  | 5091 | 32 |
| H(22C) | 4007 | 9586  | 3913 | 36 |
| H(22D) | 3936 | 11150 | 4271 | 36 |
| H(11E) | 3248 | 4419  | 5387 | 36 |
| H(11F) | 3279 | 5933  | 5803 | 36 |
| H(12B) | 3908 | 7873  | 5805 | 34 |
| H(14B) | 2807 | 9447  | 5246 | 37 |
| H(15B) | 2524 | 11997 | 4632 | 43 |
| H(16B) | 2805 | 12098 | 4081 | 35 |
| H(18B) | 3922 | 11205 | 4359 | 35 |
| H(19E) | 3822 | 6502  | 4371 | 37 |
| H(19F) | 4292 | 7883  | 4574 | 37 |
| H(20E) | 4285 | 5699  | 5493 | 32 |
| H(20F) | 3814 | 4856  | 5070 | 32 |
| H(22E) | 3711 | 8762  | 3660 | 36 |
| H(22F) | 3202 | 8920  | 3614 | 36 |
| H(1SA) | 5493 | 8357  | 4351 | 70 |
| H(1SB) | 5028 | 6986  | 4094 | 70 |

|        |      |       |      |    |
|--------|------|-------|------|----|
| H(1SC) | 5462 | 8453  | 4286 | 70 |
| H(1SD) | 5550 | 10035 | 4714 | 70 |

## COMPUTATIONAL DETAILS

All calculations were carried out using Gaussian 16.<sup>17</sup> Geometries of intermediates and transition states were optimized using the dispersion-corrected B3LYP functional,<sup>18</sup> using Grimme's D3 dispersion correction,<sup>19</sup> with a mixed basis set of SDD for Pd, I, and 6-31G(d) for other atoms in the gas phase. Vibrational frequency calculations were performed for all the stationary points to confirm if each optimized structure is a local minimum or a transition state structure. Solvation energy corrections were calculated in HFIP solvent with the SMD continuum solvation model<sup>20</sup> based on the gas-phase optimized geometries. The M06 functional<sup>21</sup> with a mixed basis set of SDD for Pd, I, and 6-311++G(d,p) for other atoms was used for solvation single-point energy calculations. Truhlar's quasi-harmonic corrections<sup>22</sup> were applied for entropy calculations using 100 cm<sup>-1</sup> as the frequency cutoff. Translational entropy in HFIP solution was calculated using the method proposed by Whitesides.<sup>23</sup>

### *Additional Computational Results*

Several nucleopalladation mechanisms were explored. The anionic *anti*-addition (**TS1**) was found to be the most favorable pathway.

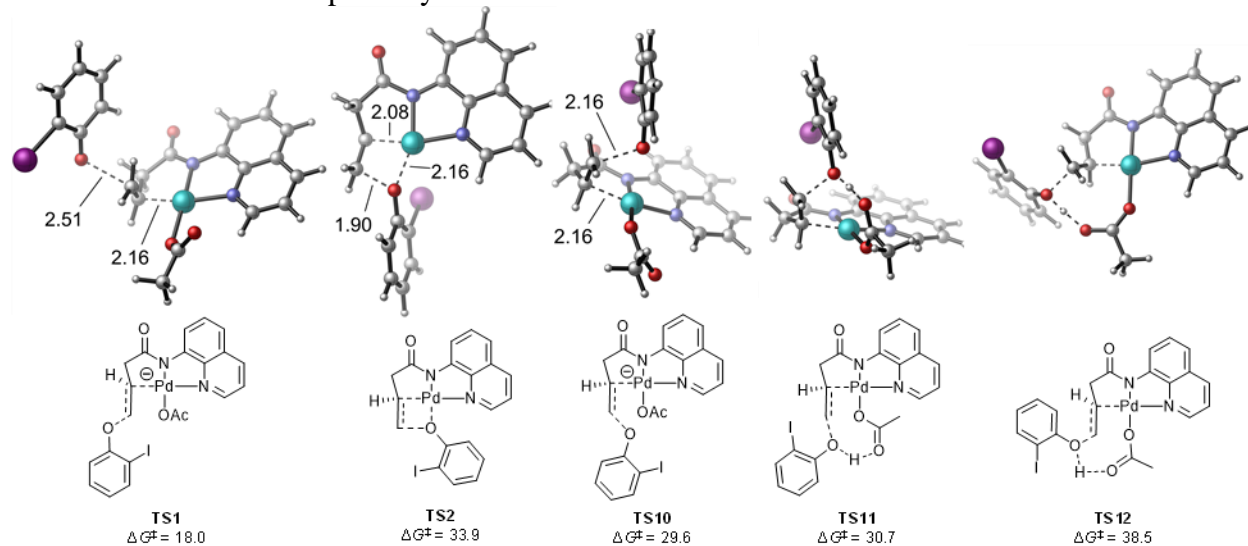

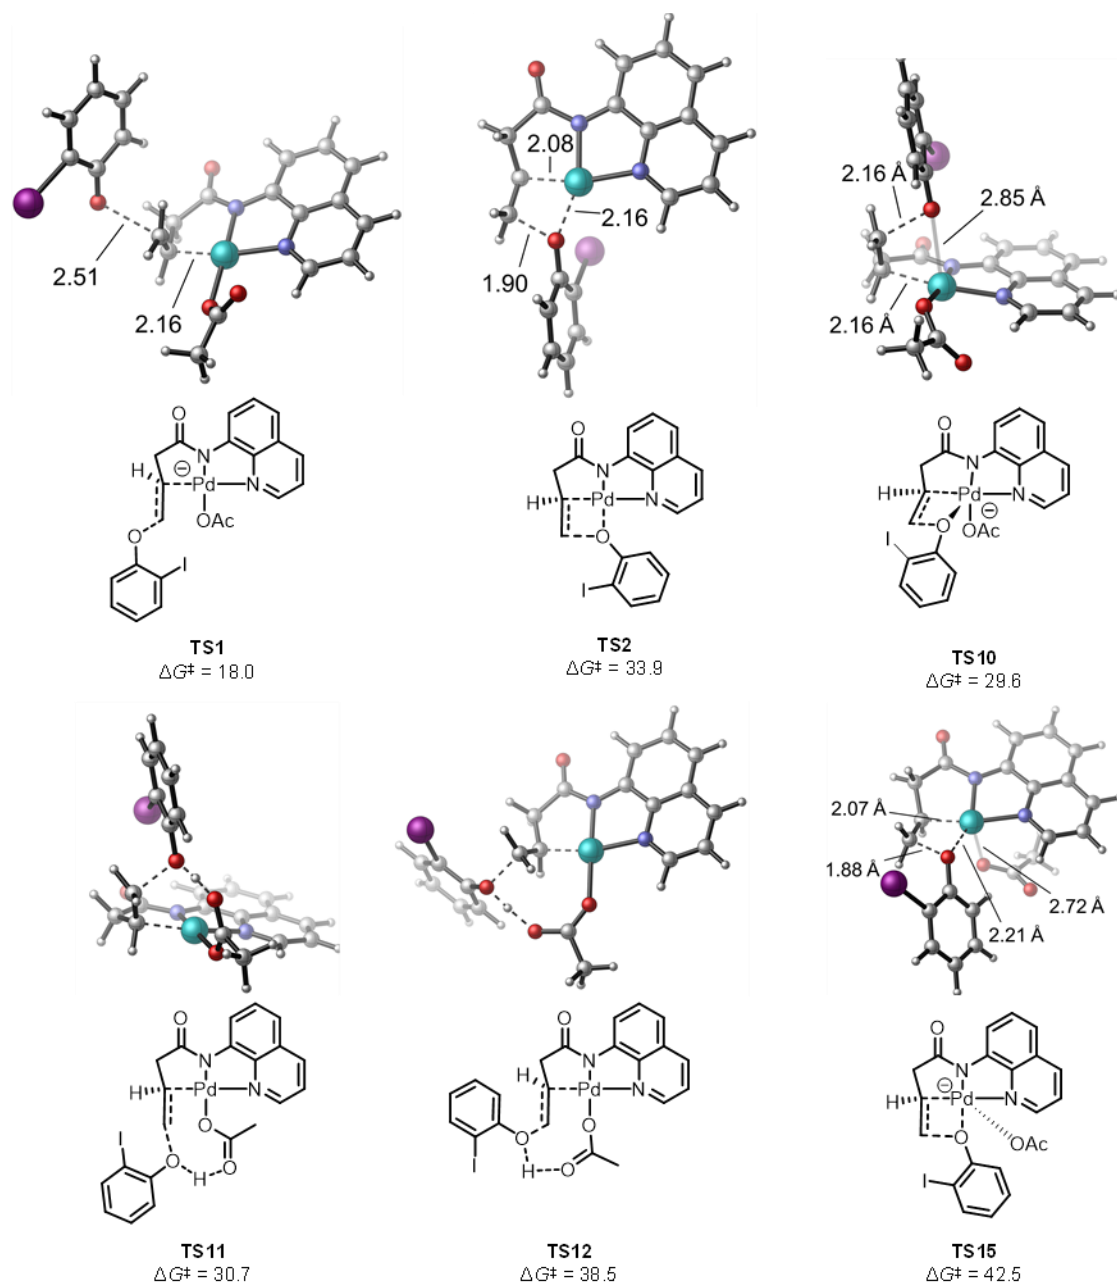

**Supplementary Figure 20.** Structures and energies of different nucleopalladation transition states. All energies are in kcal/mol with respect to complex **10**.

The intermolecular coupling reaction between complex **12** and **2aa** was computed to compare to the intramolecular coupling reaction. The calculations show that the intramolecular pathway is favored not only entropically, but also by decreased steric repulsions. The enthalpies ( $\Delta H$ ) of the intermolecular oxidative addition (**TS13**) and the reductive elimination (**TS14**) transition states are higher than those of the intramolecular pathway (**TS3** and **TS5**, respectively). This suggests that the ring strain associated with the intramolecular reaction is relatively small and outweighed by the steric repulsion with the ortho OH group in intermolecular reaction.

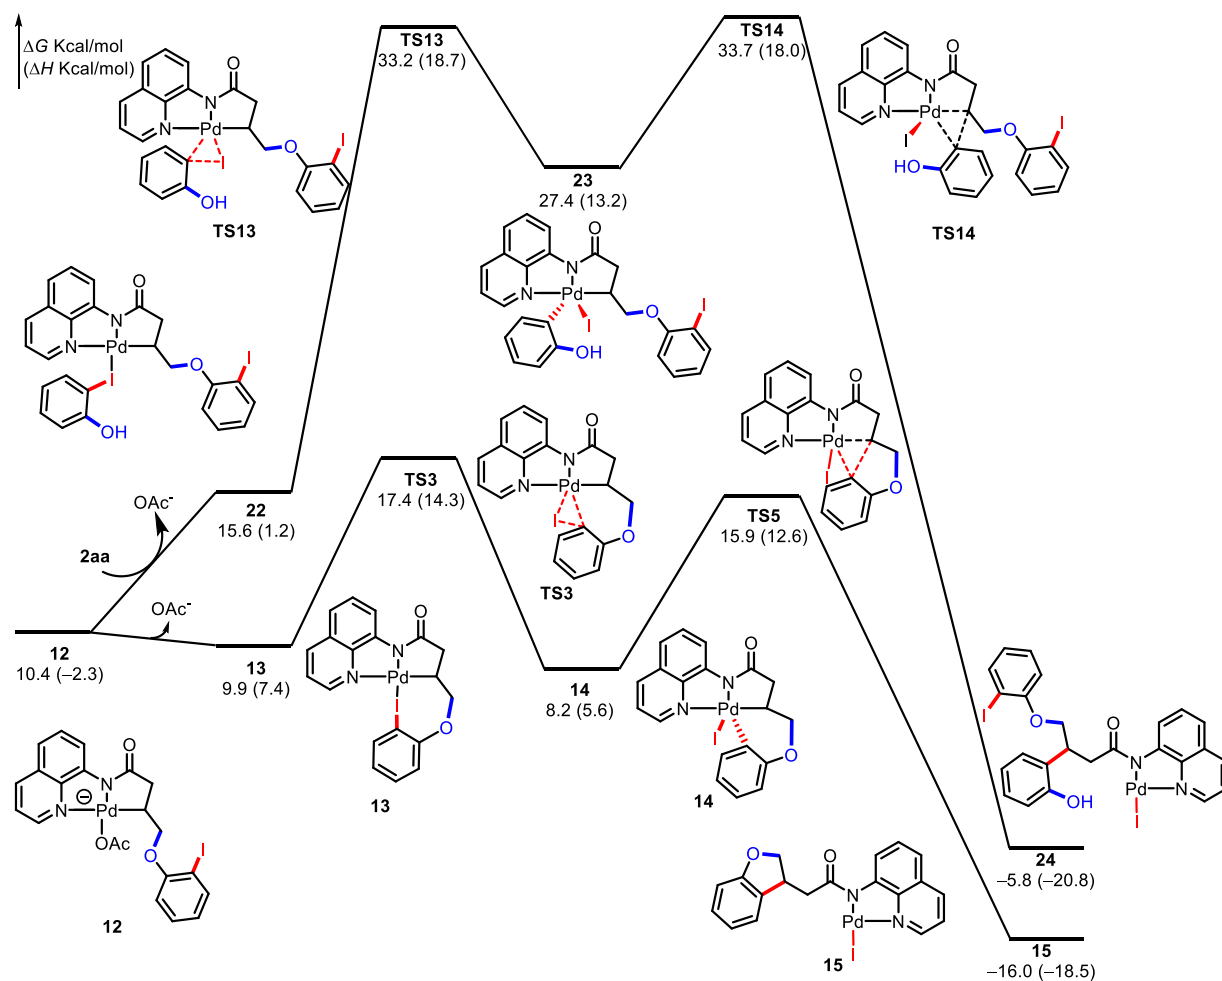

**Supplementary Figure 21.** Comparison of intramolecular and intermolecular arylation of complex **12**. All energies are with respect to complex **10** and **2aa**.

Other possible conformations for the intramolecular oxidative addition transition state were also considered. Puckering of the methylene group (**TS3b**) causes highlighted dihedral to adopt an almost eclipsed conformation, which destabilizes the transition state. Placement of the iodo- group anti to the  $\alpha$ -C-H (**TS3c**) can cause increased strain on the palladacycle destabilizing the transition state.

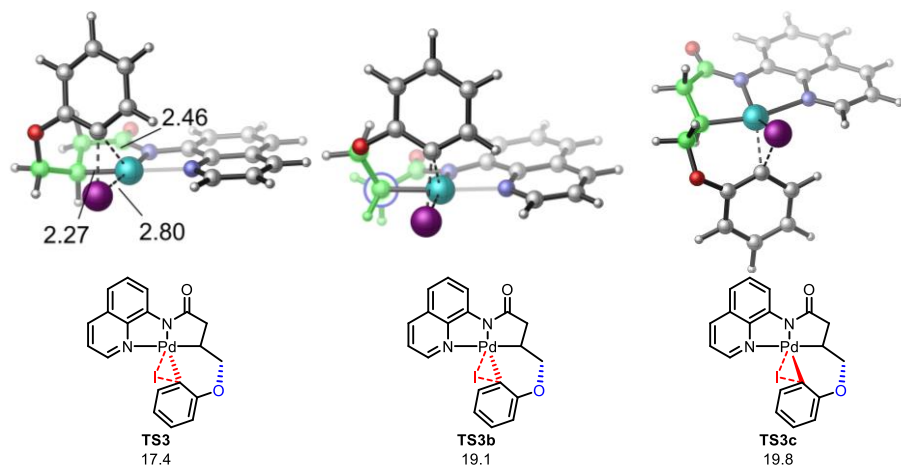

**Supplementary Figure 22.** Structures and energies of oxidative addition transition states. All Gibbs free energies are in kcal/mol with respect to complex **10** and **2aa**.



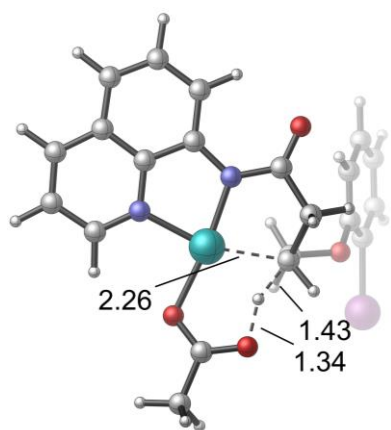

TS4

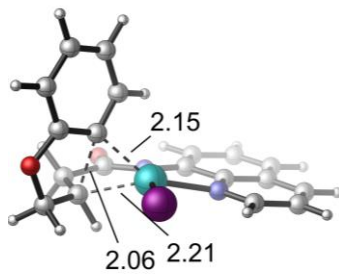

TS5

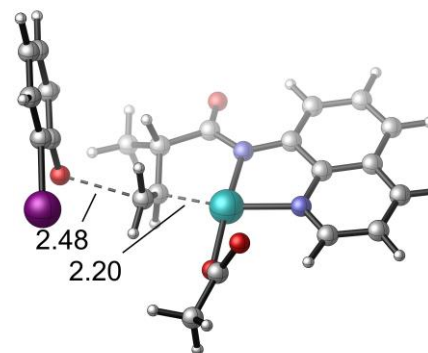

TS6

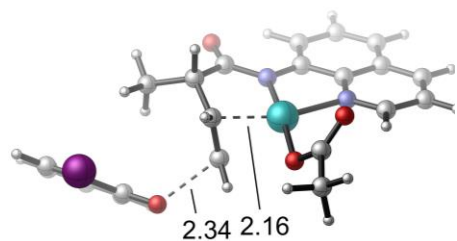

TS7

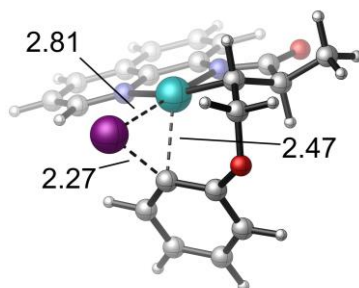

TS8

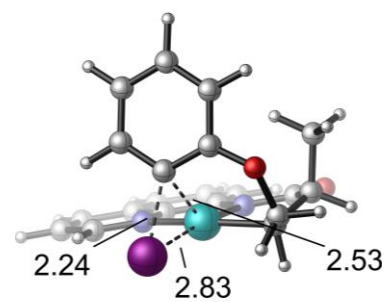

TS9

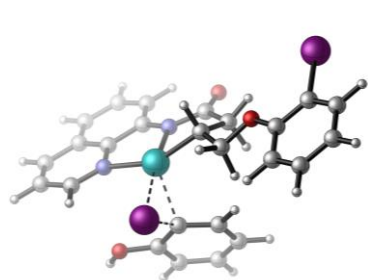

TS13

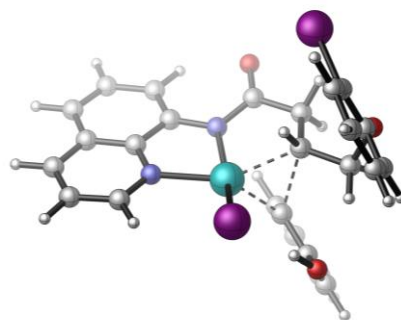

TS14

Supplementary Figure 23. 3D Structures of other transition states.

**Supplementary Table 29. Comparison of free energies of key TS and intermediates using different levels of theory for geometry optimization.** All energies are in kcal/mol relative to **10** and **2aa**. In all calculations, single point energies were calculated at the M06/SDD-6-311++G(d,p) level using the SMD solvation model in HFIP.

| Structure  | Method for Geometry Optimization |                  |
|------------|----------------------------------|------------------|
|            | B3LYP-D3/SDD-6-31G(d)            | M06/SDD-6-31G(d) |
| <b>10</b>  | 0.0                              | 0.0              |
| <b>TS1</b> | 18.2                             | 18.0             |
| <b>TS2</b> | 33.4                             | 33.9             |
| <b>13</b>  | 10.0                             | 9.9              |
| <b>TS3</b> | 18.6                             | 17.4             |

Both B3LYP-D3 and M06 were used to optimize key intermediates and transition state structures. These results show that there is no significant difference between these two methods. All computed values reported in the main manuscript were calculated using M06 for single point and B3LYP-D3 for geometry optimization.

## NMR SPECTRA

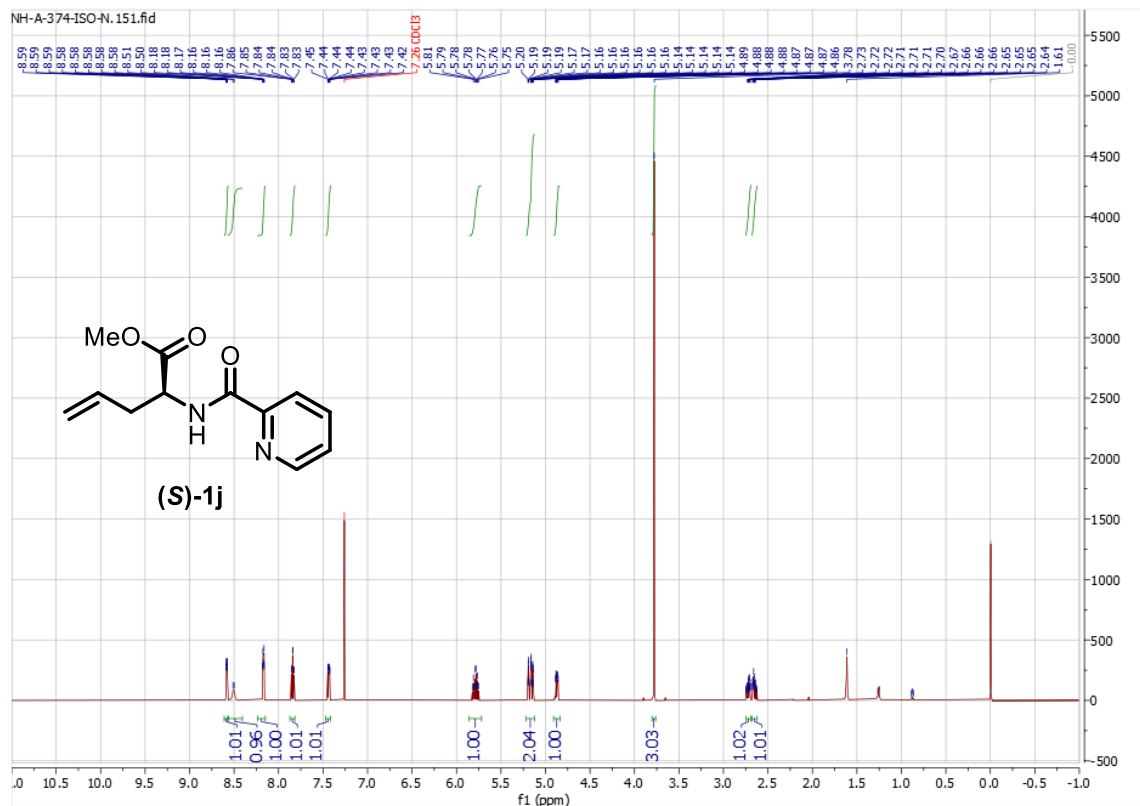

NH-A-374-ISO-N.152.fid

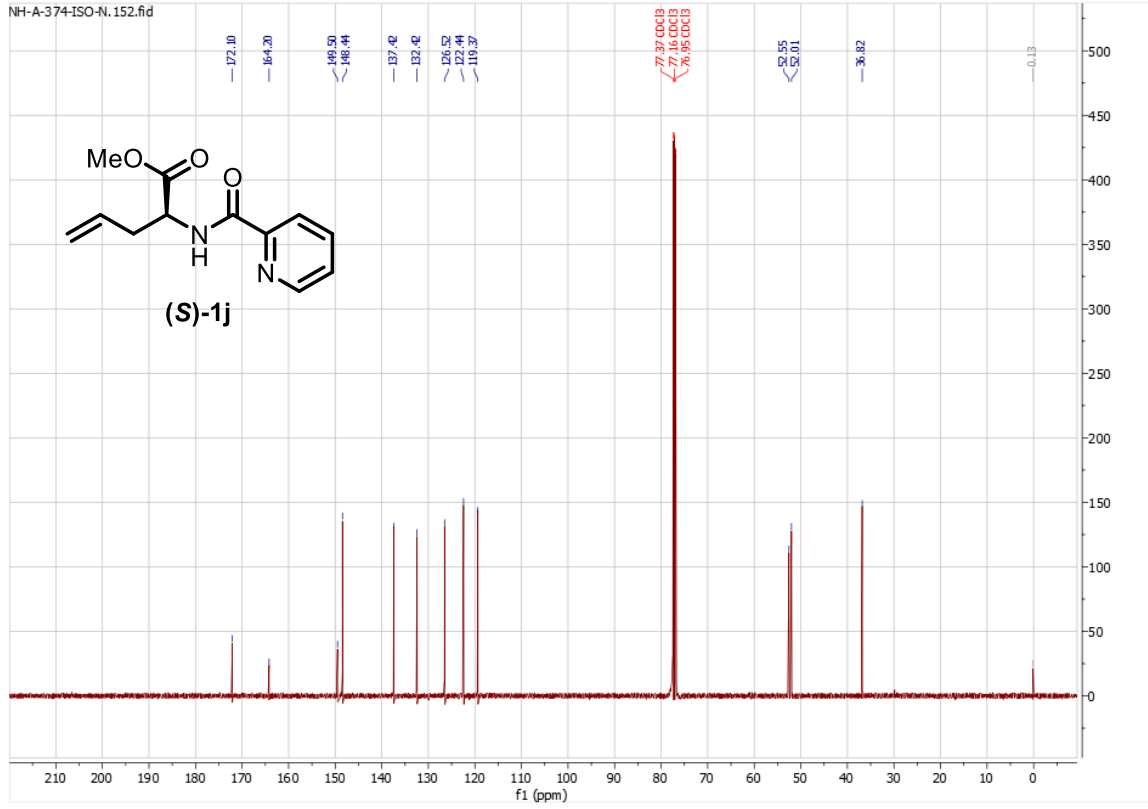

NH-A-373-ISO-N.149.fid

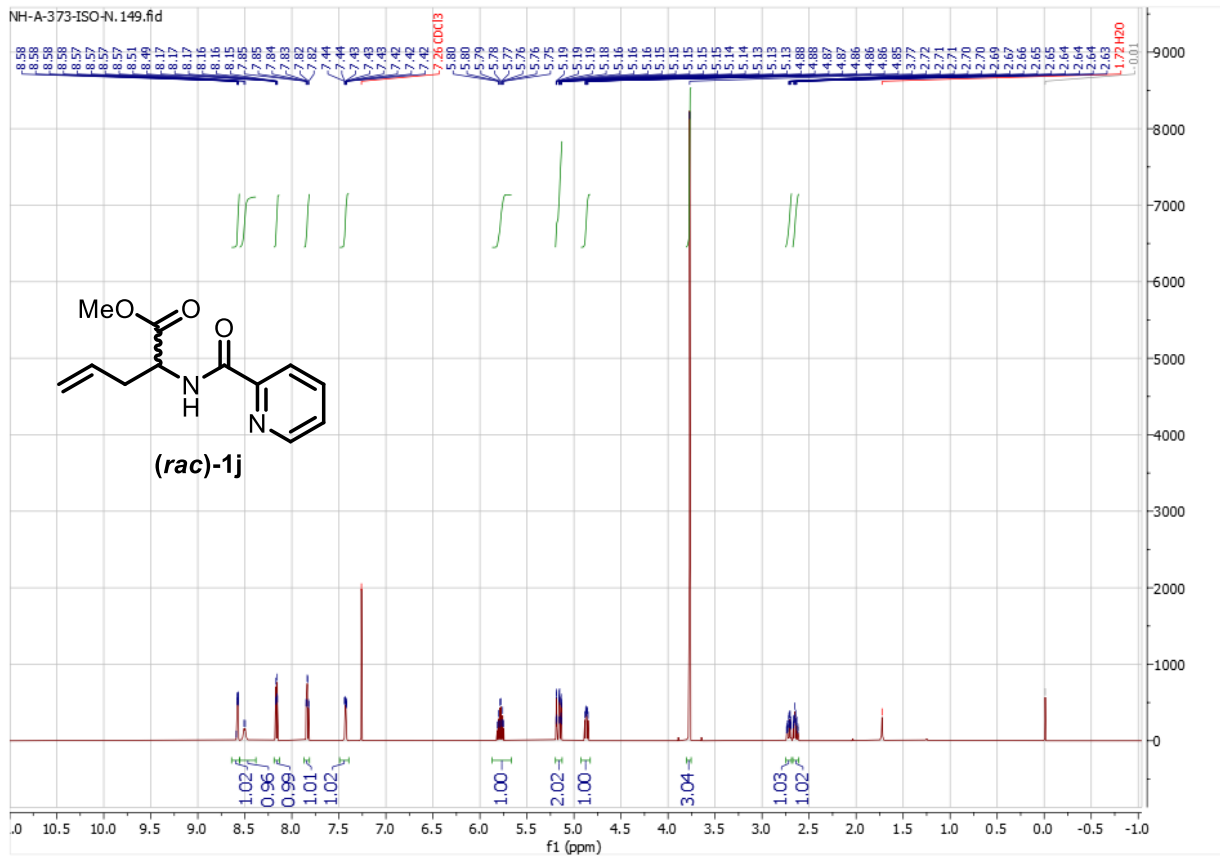

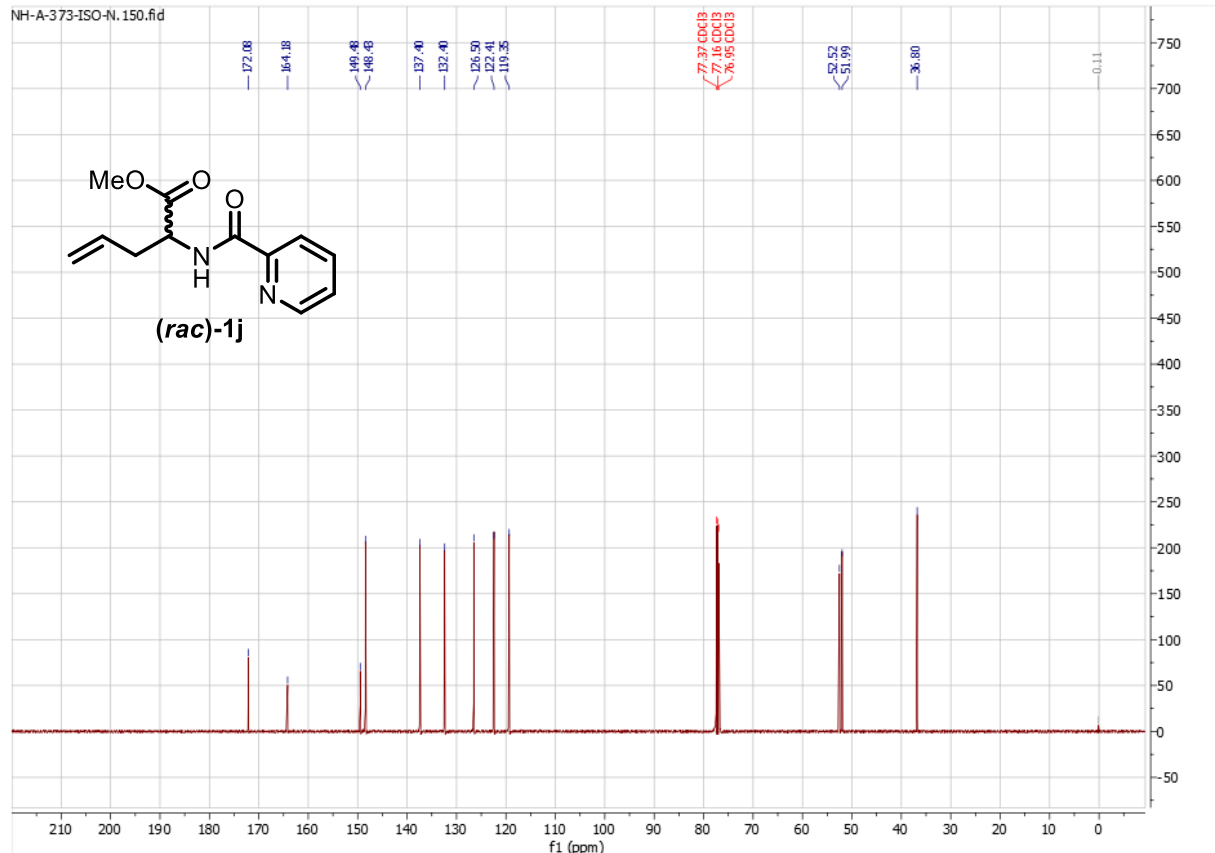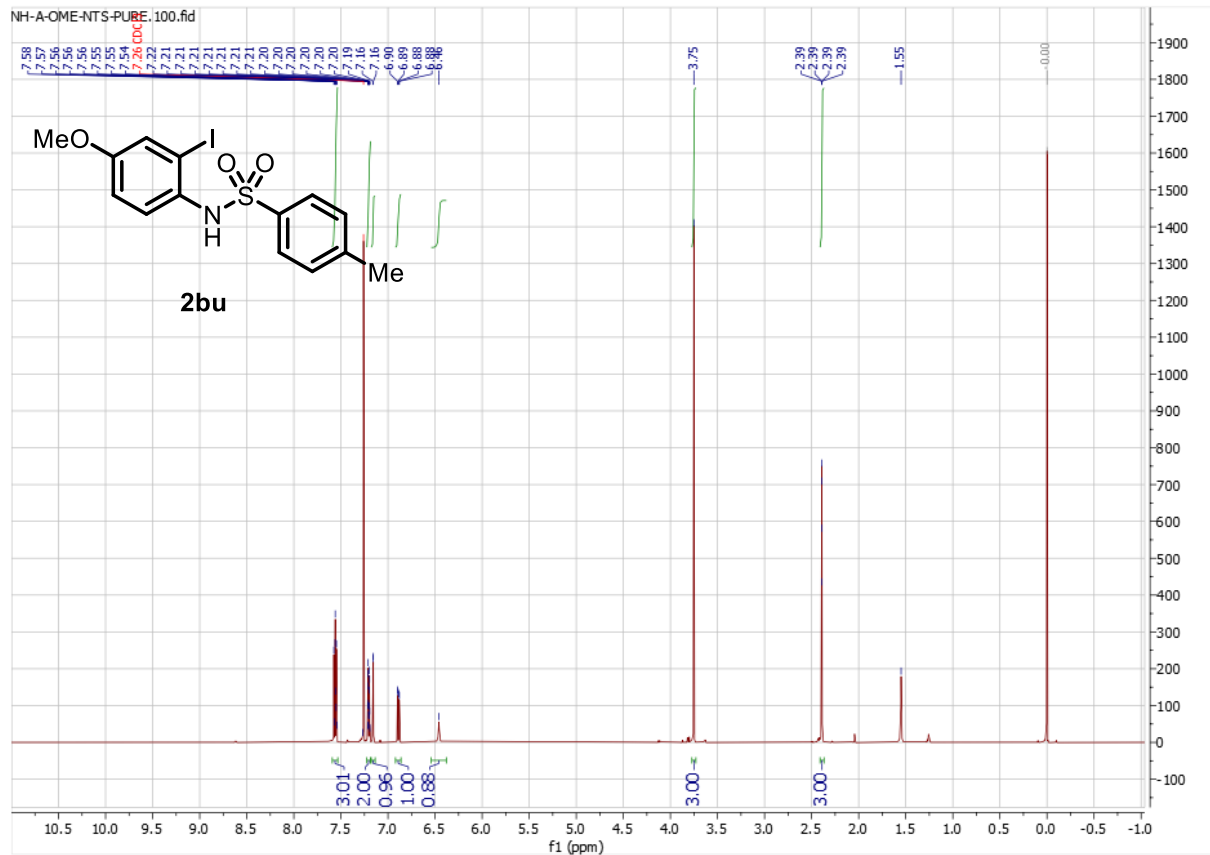

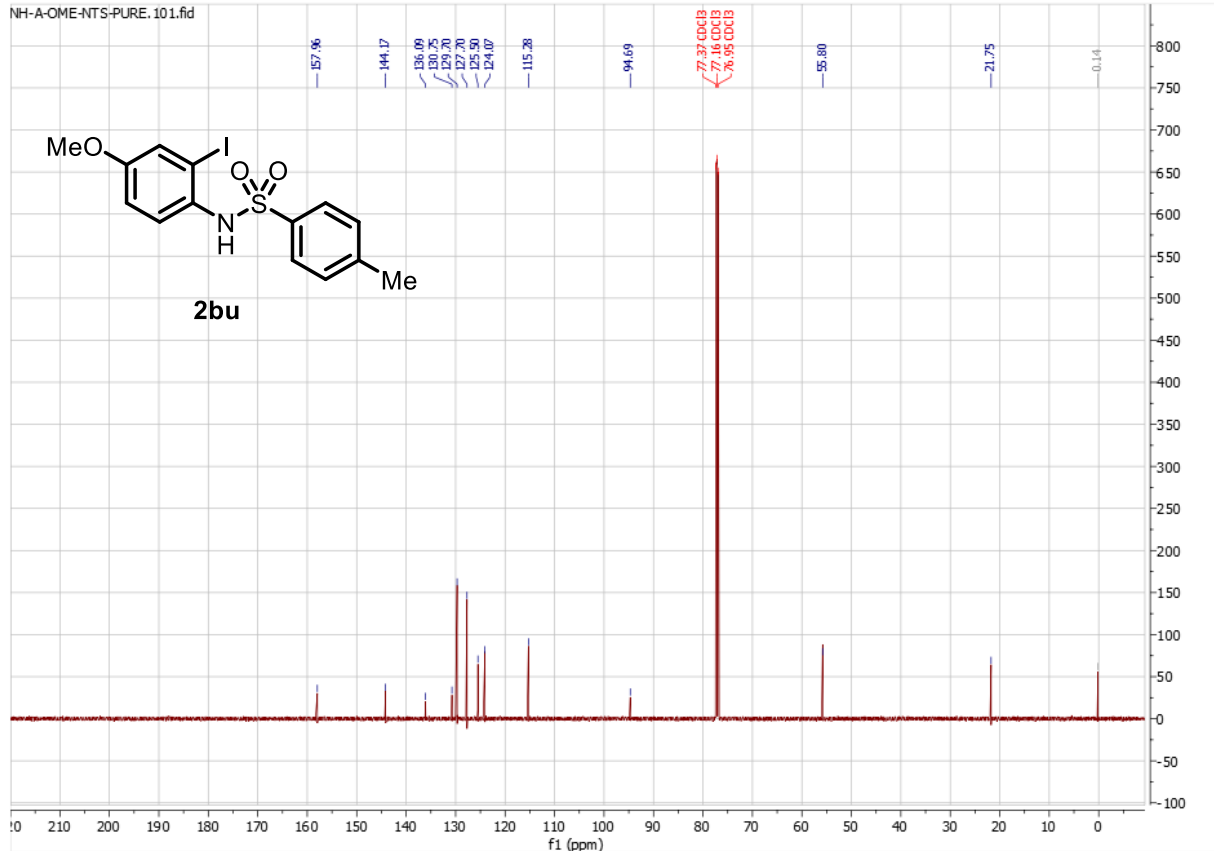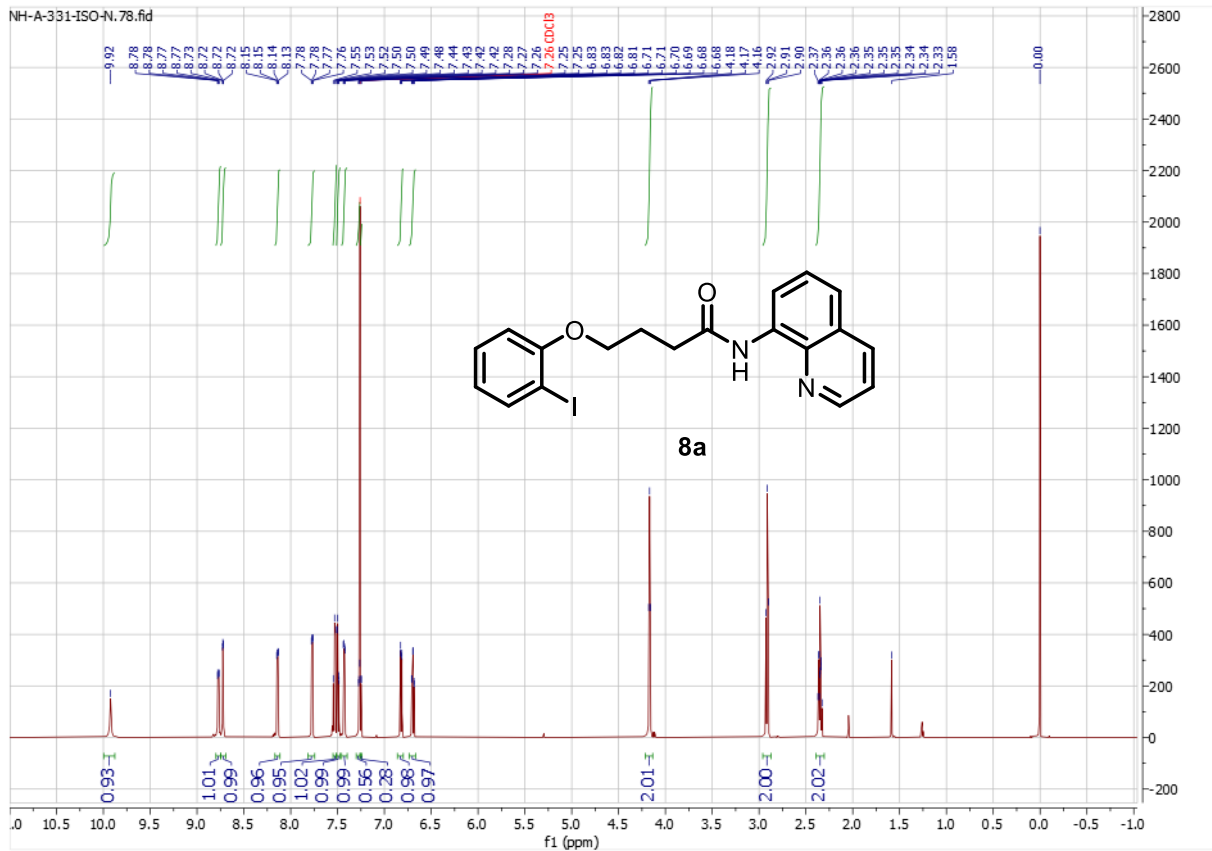

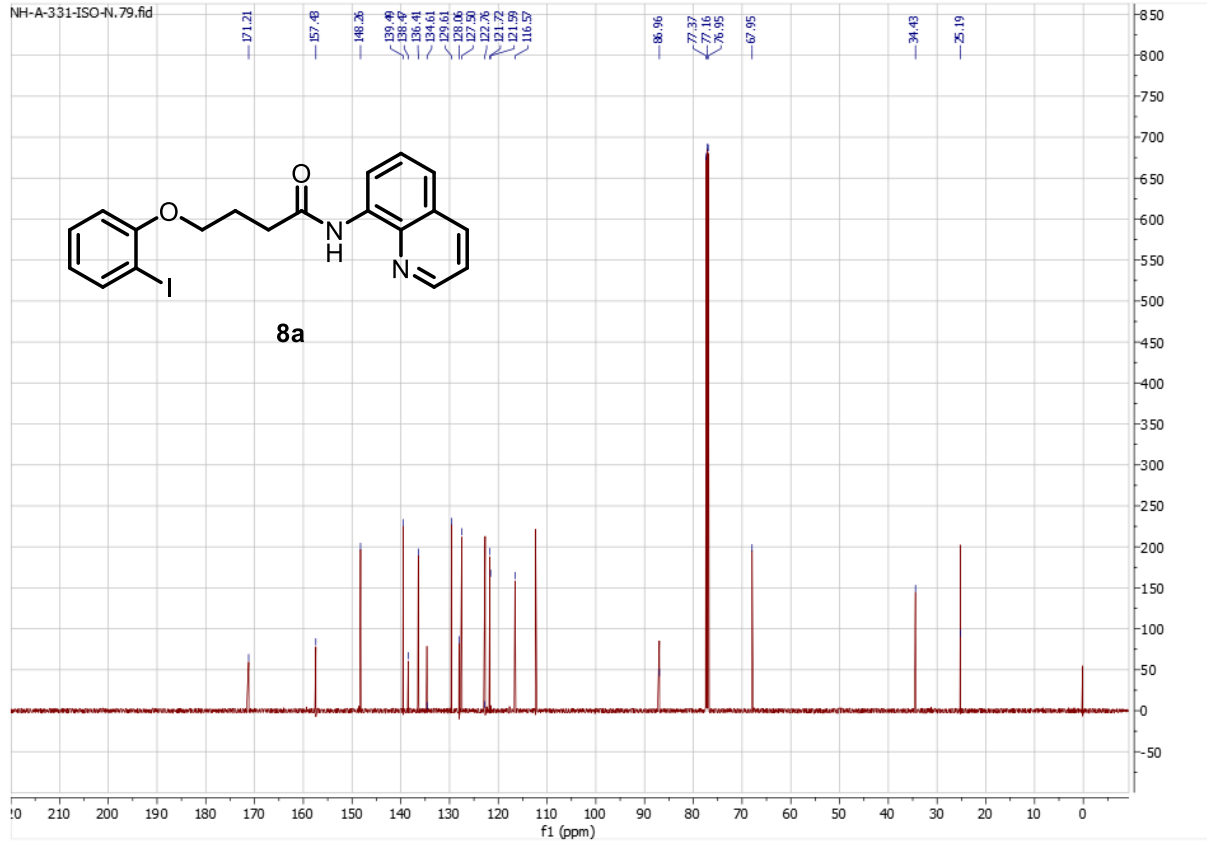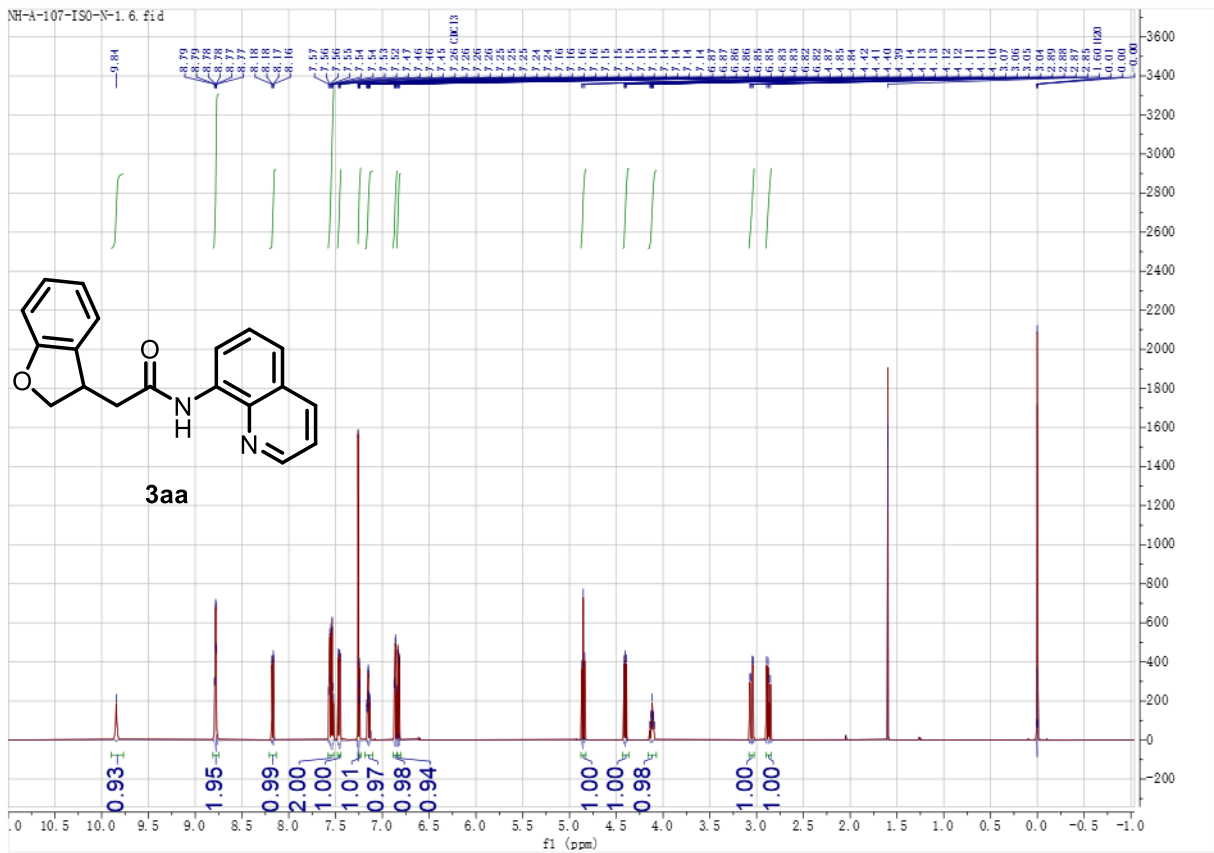

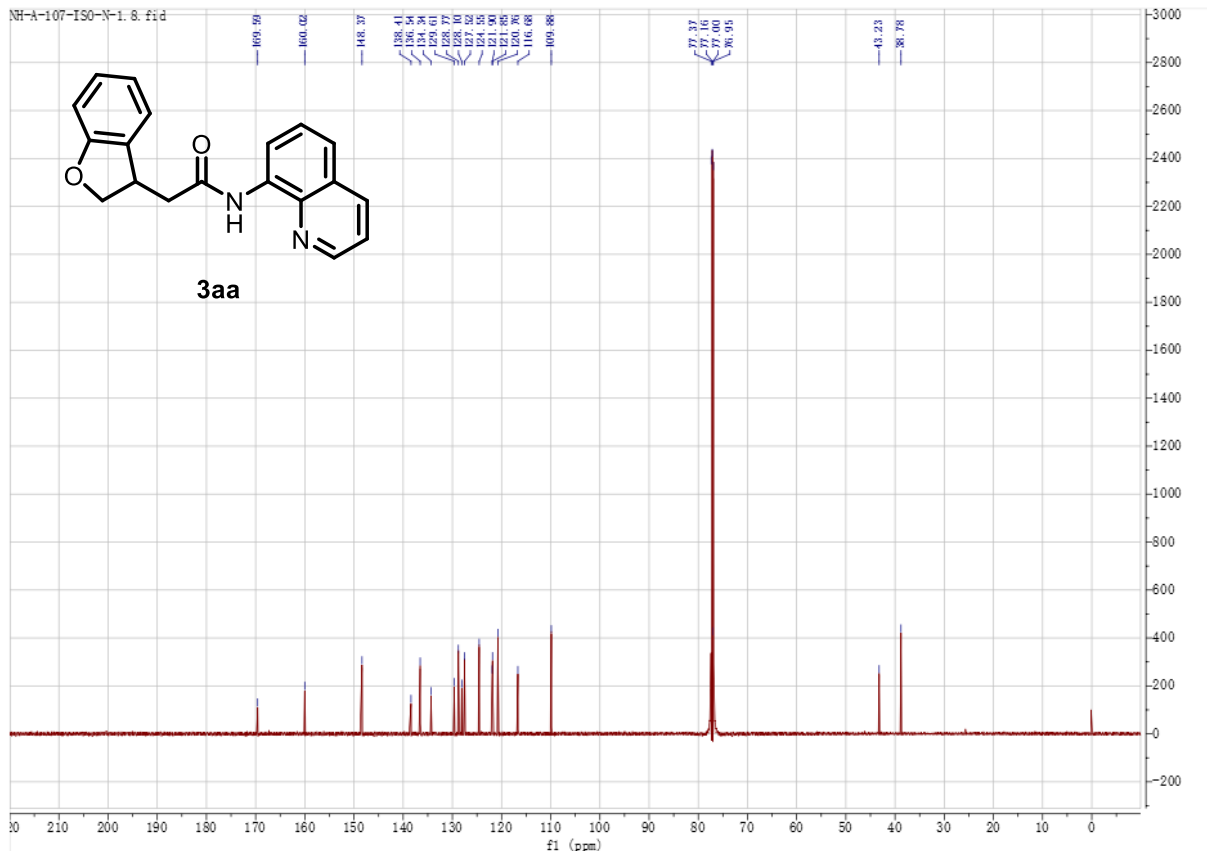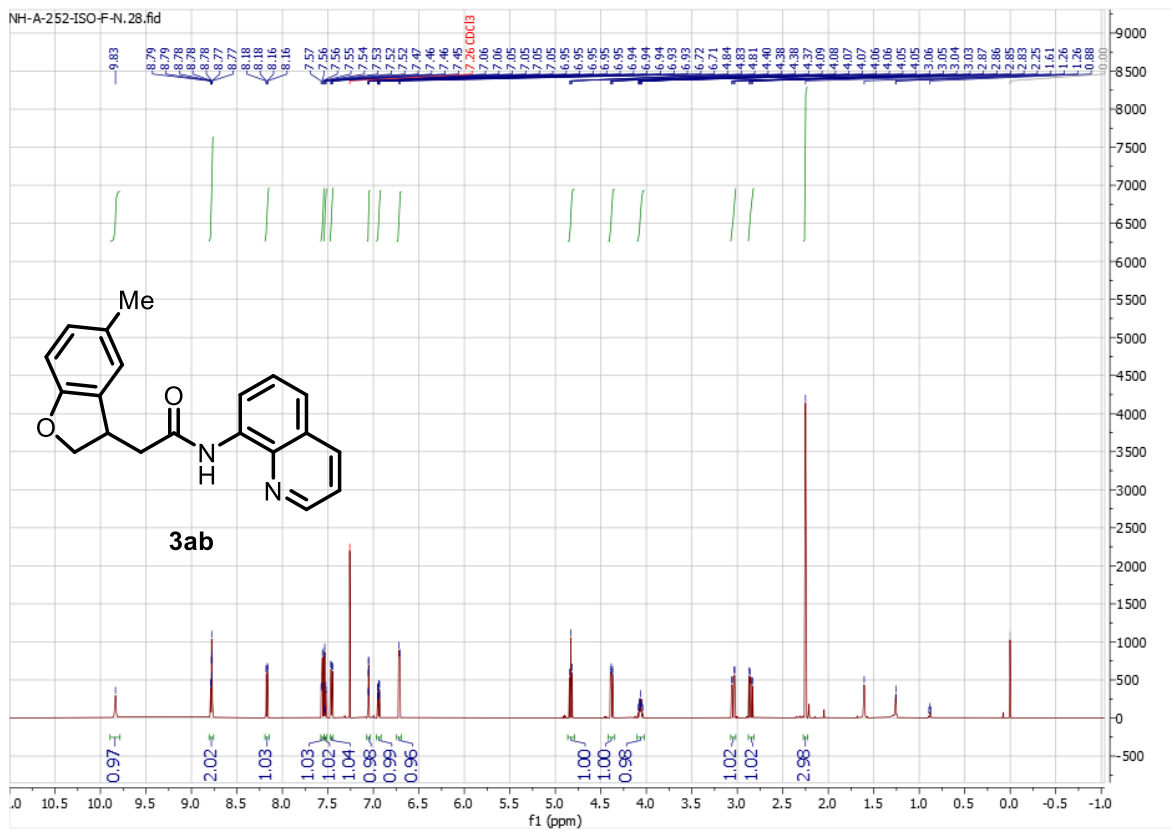

NH-A-252-ISO-F-N.27.fid

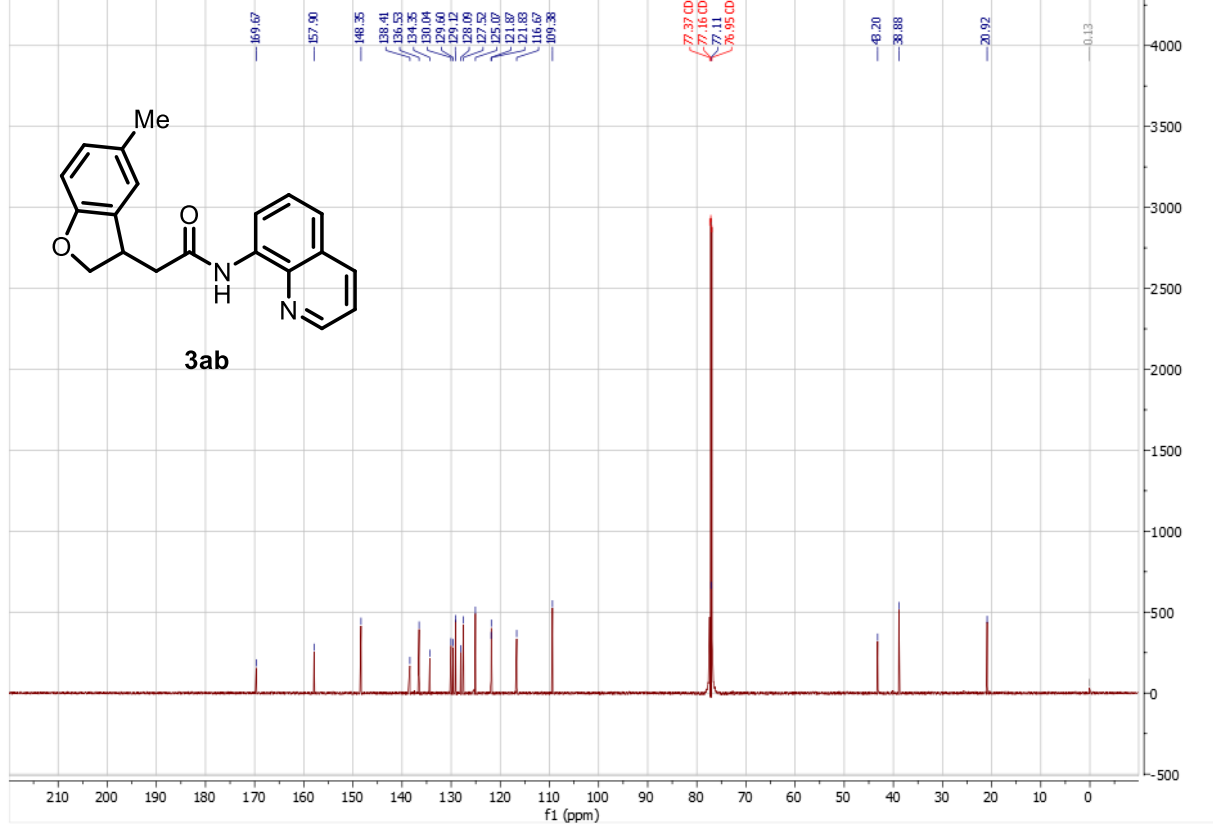

NH-A-323-ISO-F-F.71.fid

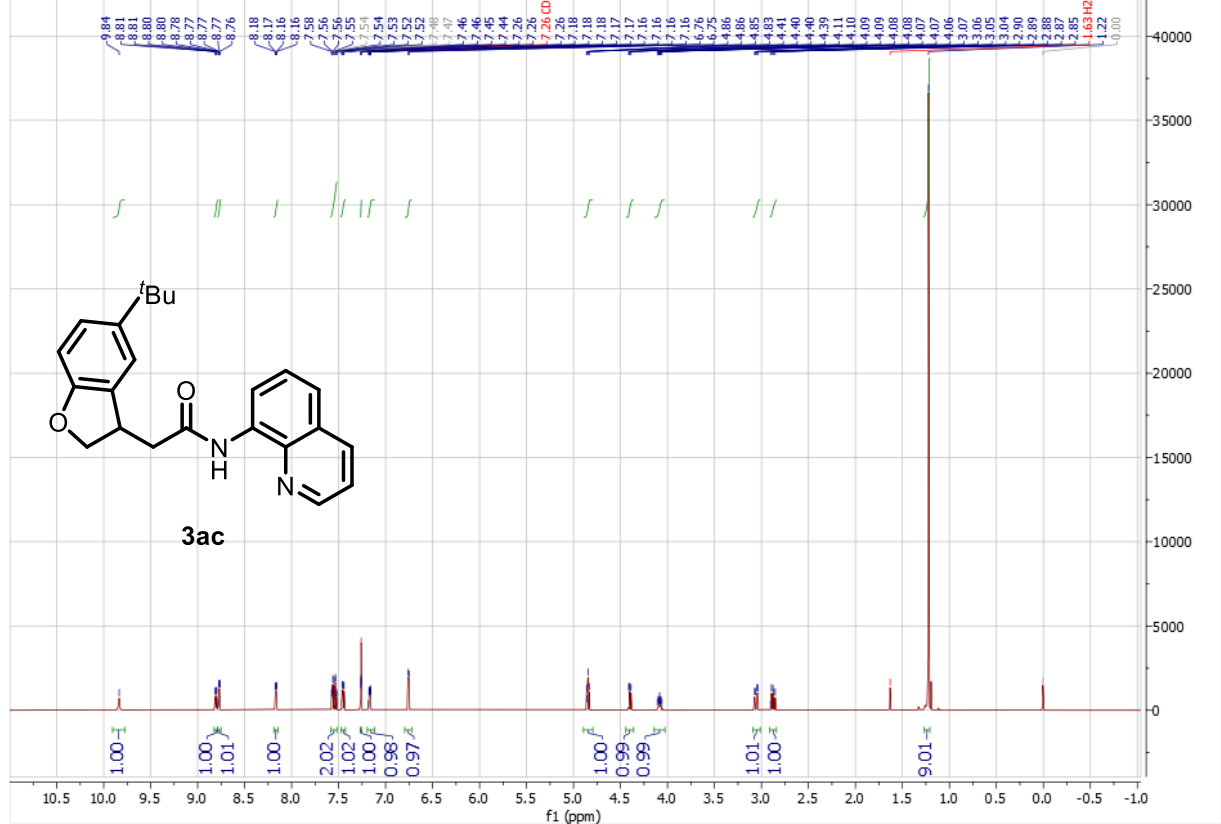



NH-A-323-ISO-F-F.72.fid

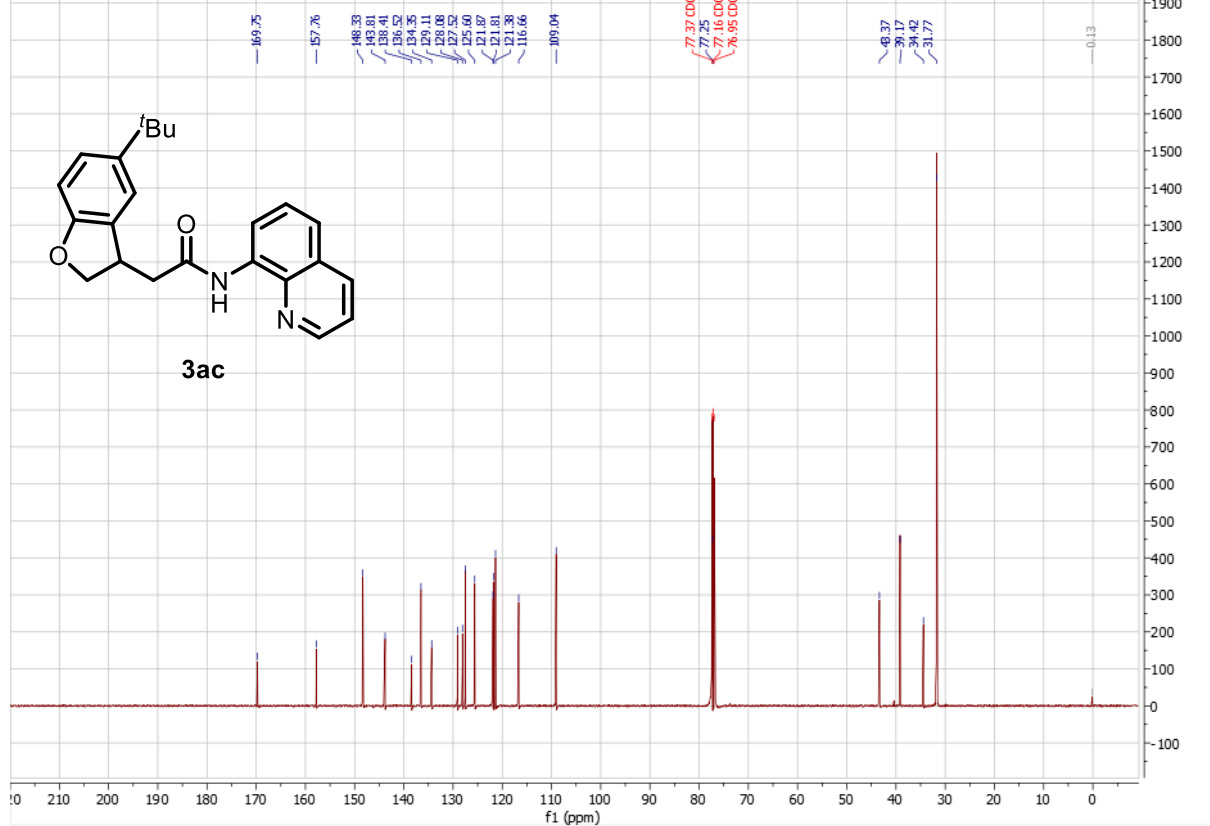

LH-A-003-ISO.13.fid

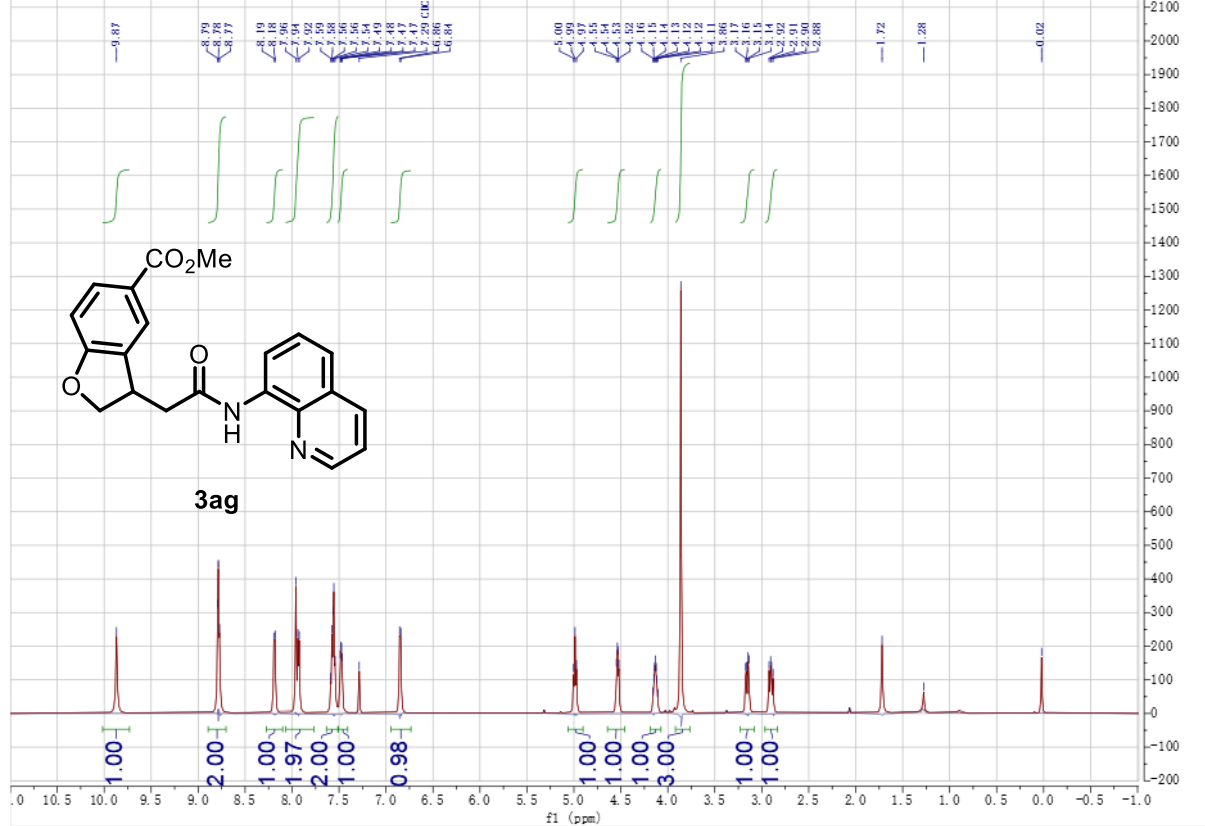

LH-A-003-ISO. 14.fid

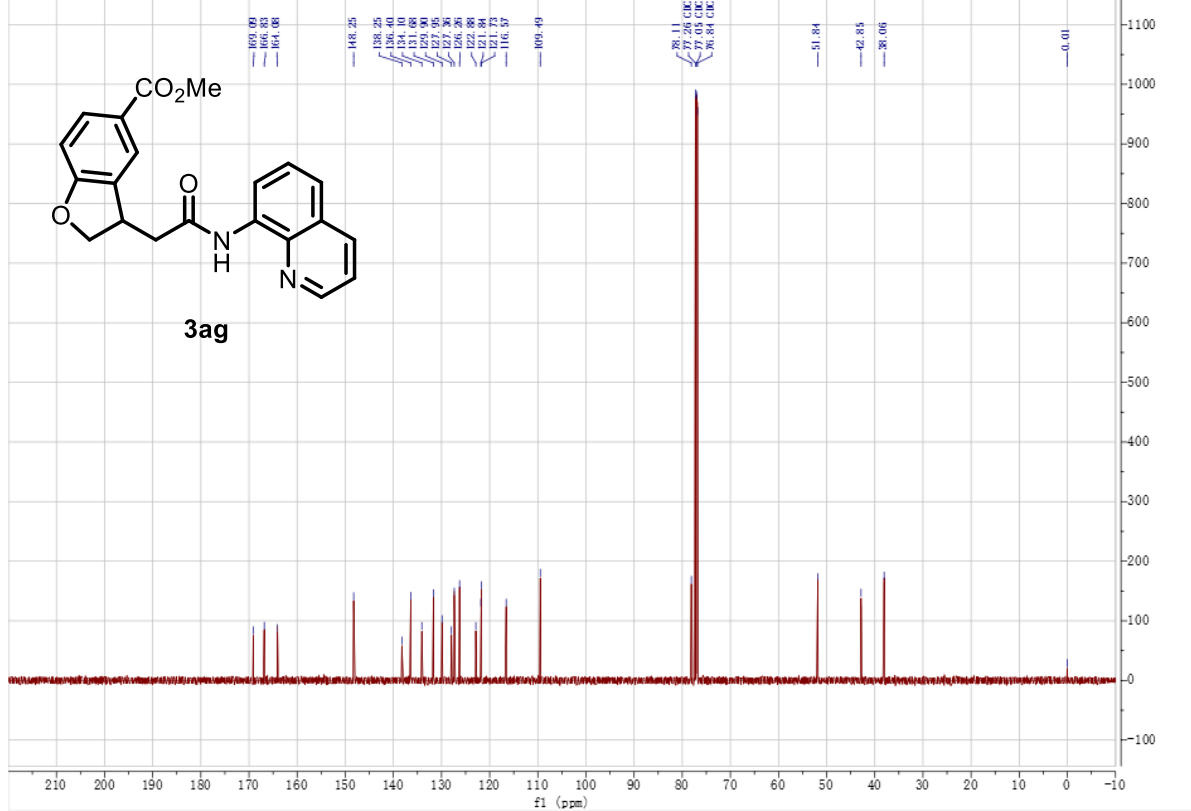

NH-A-253-ISO-F-N.25.fid

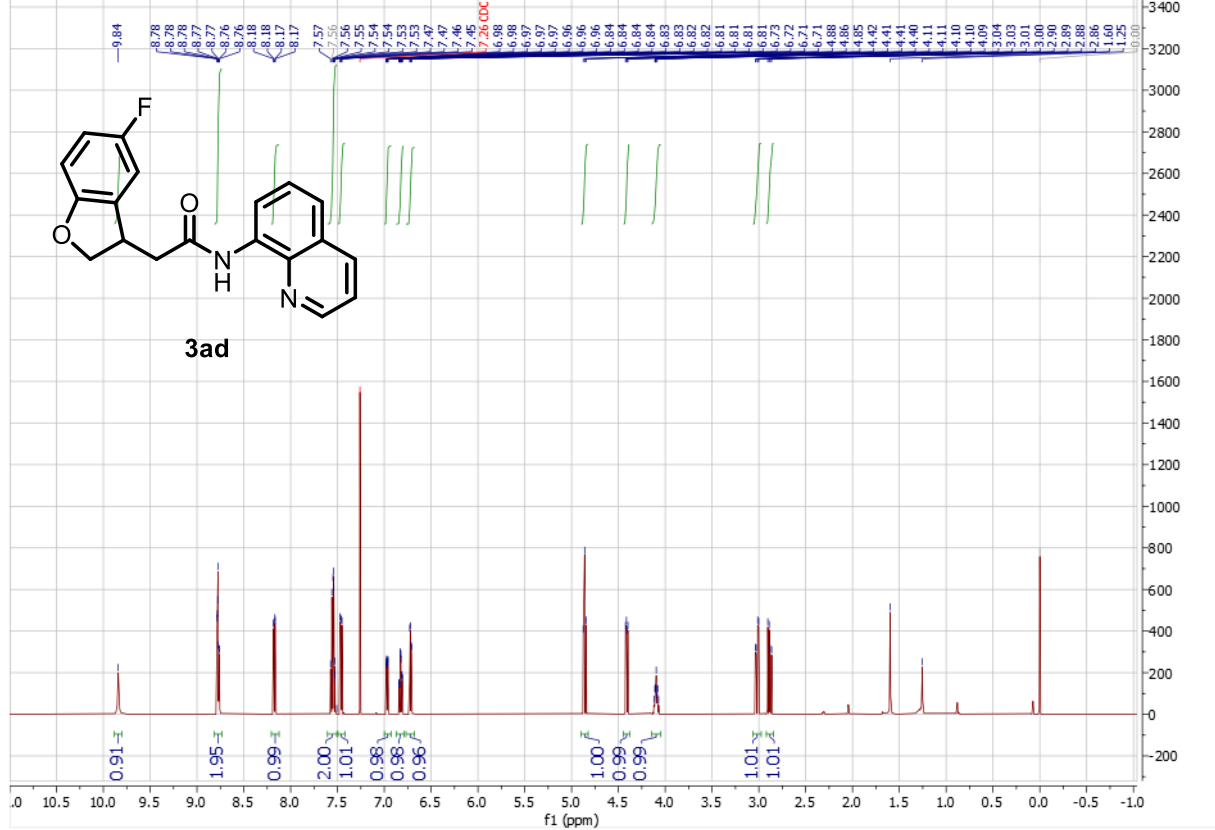

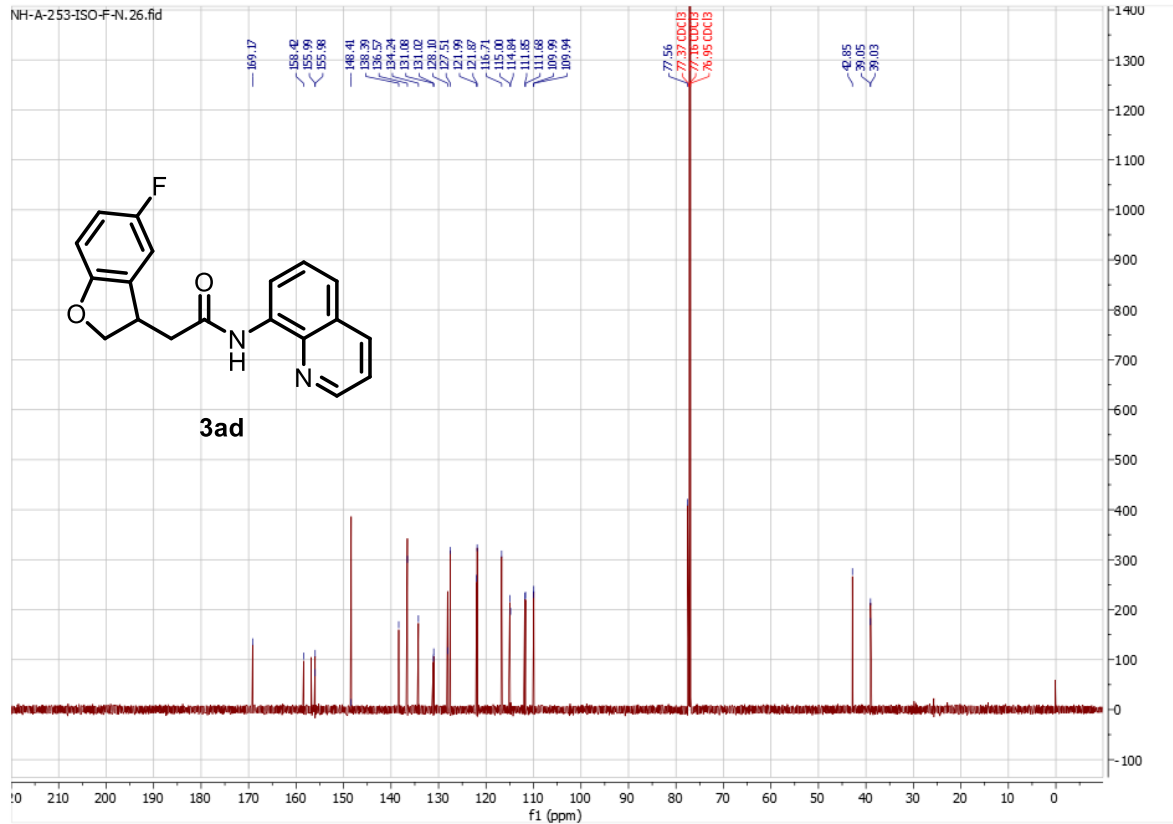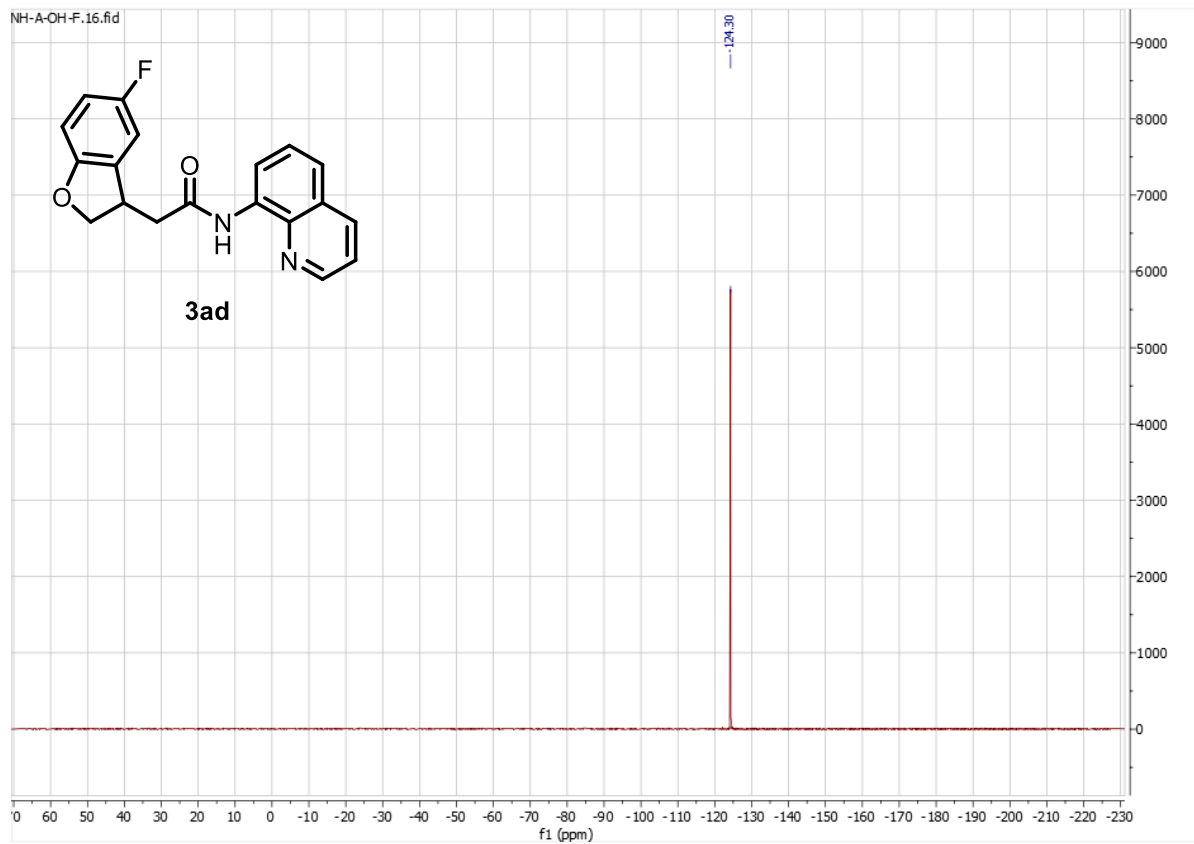

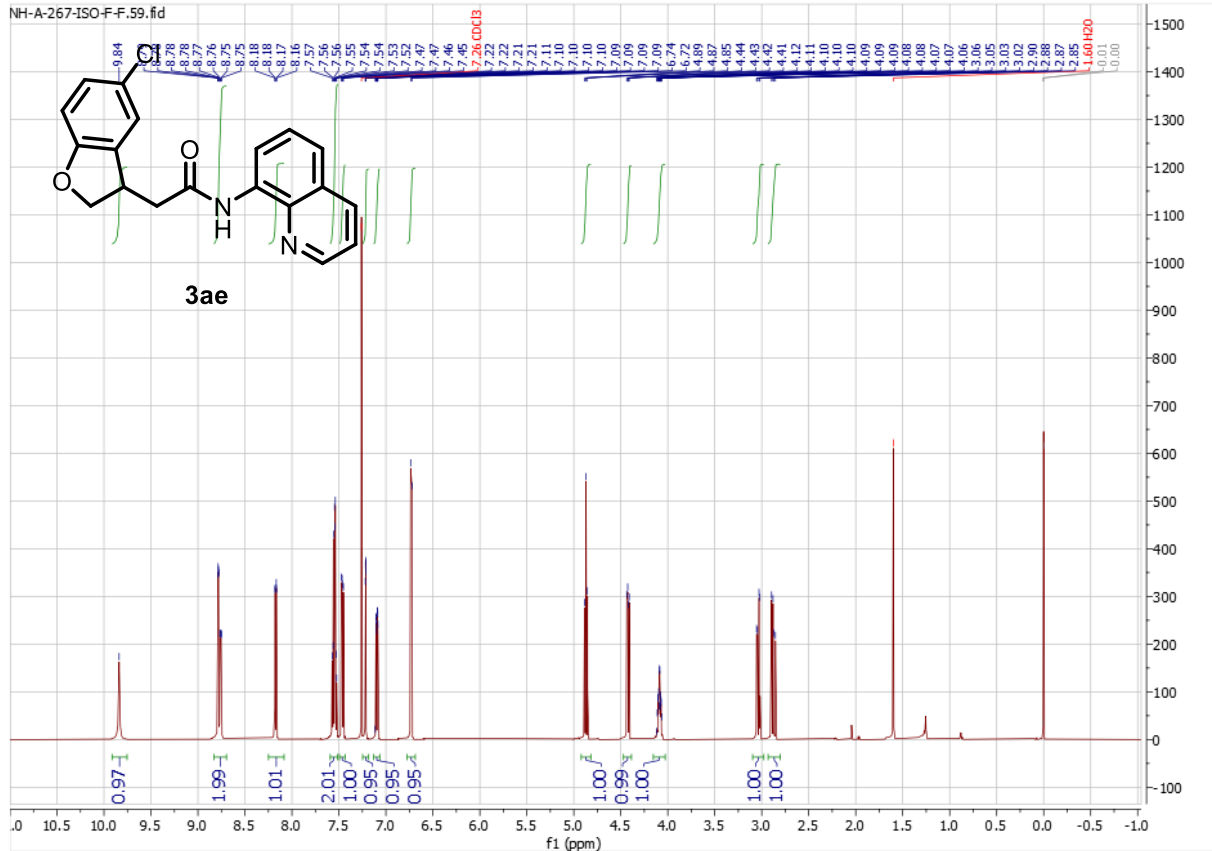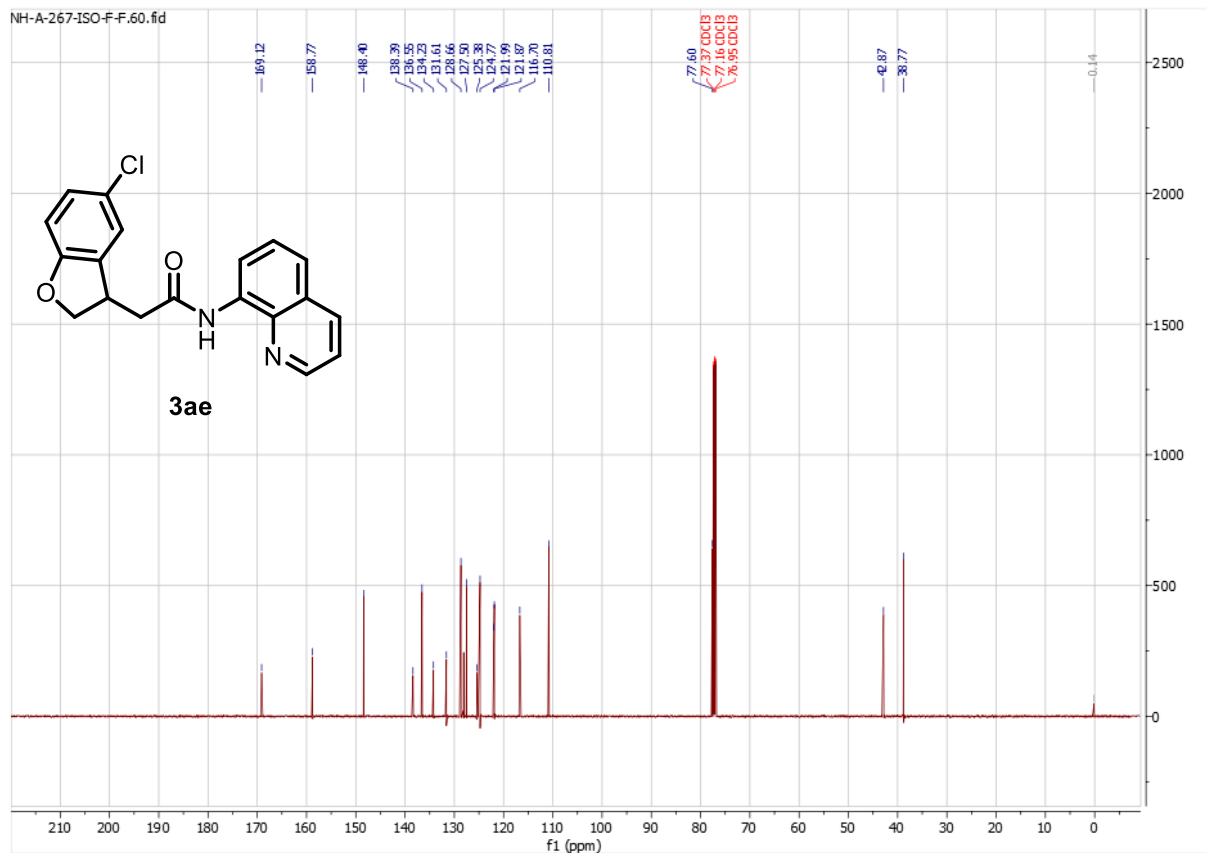

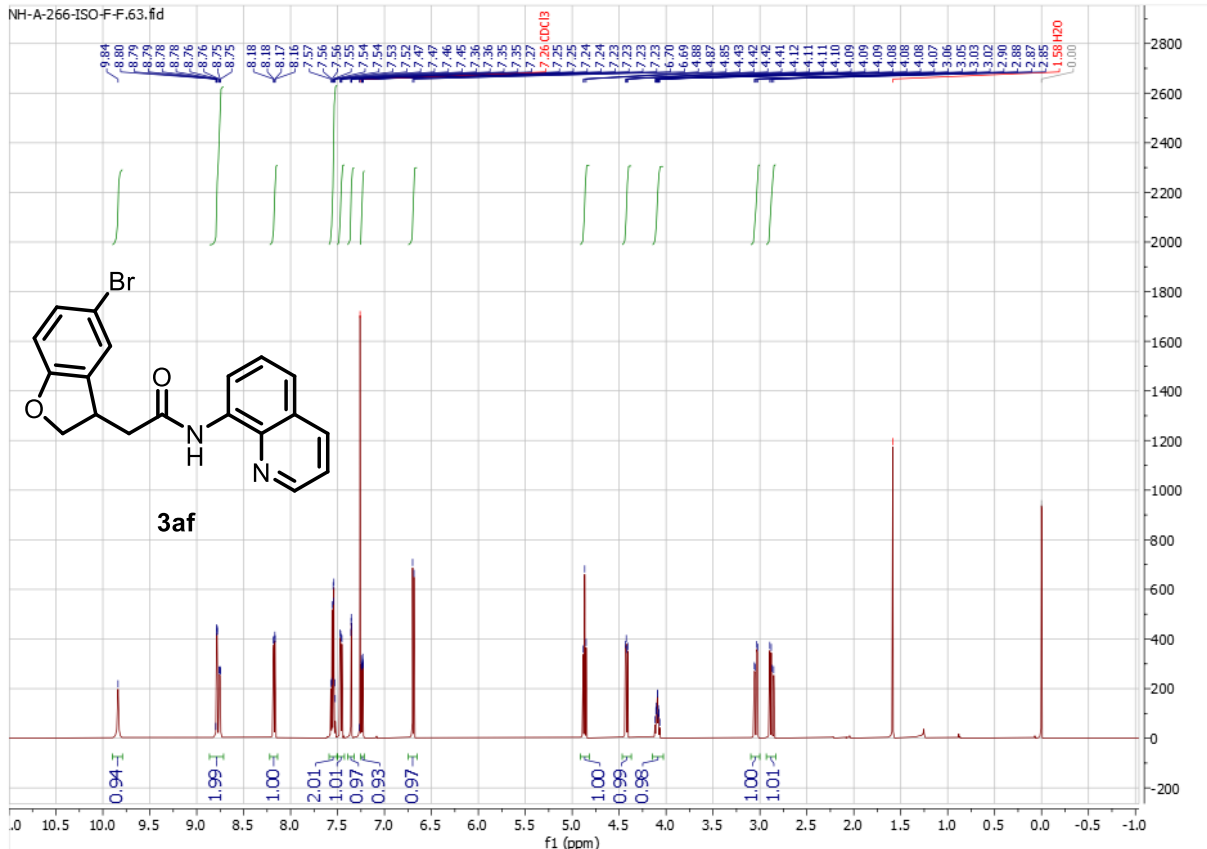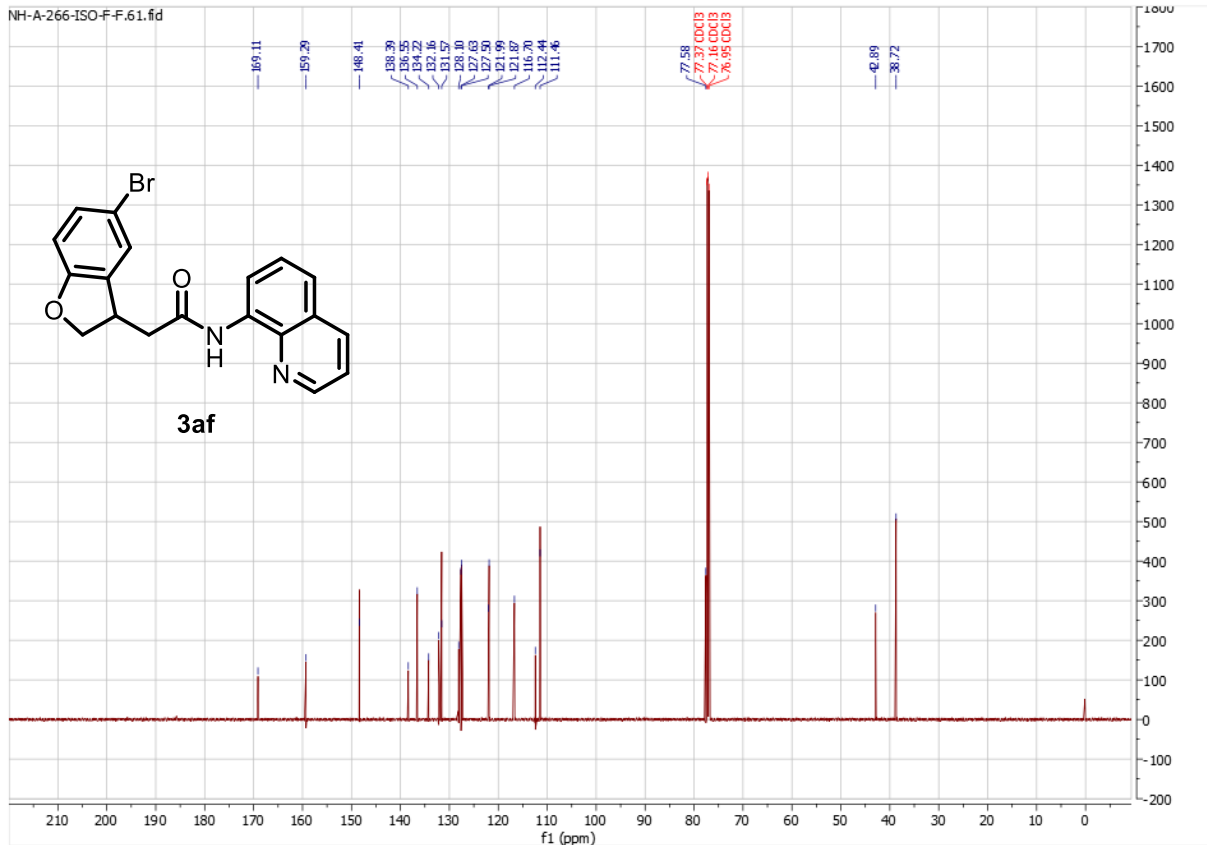

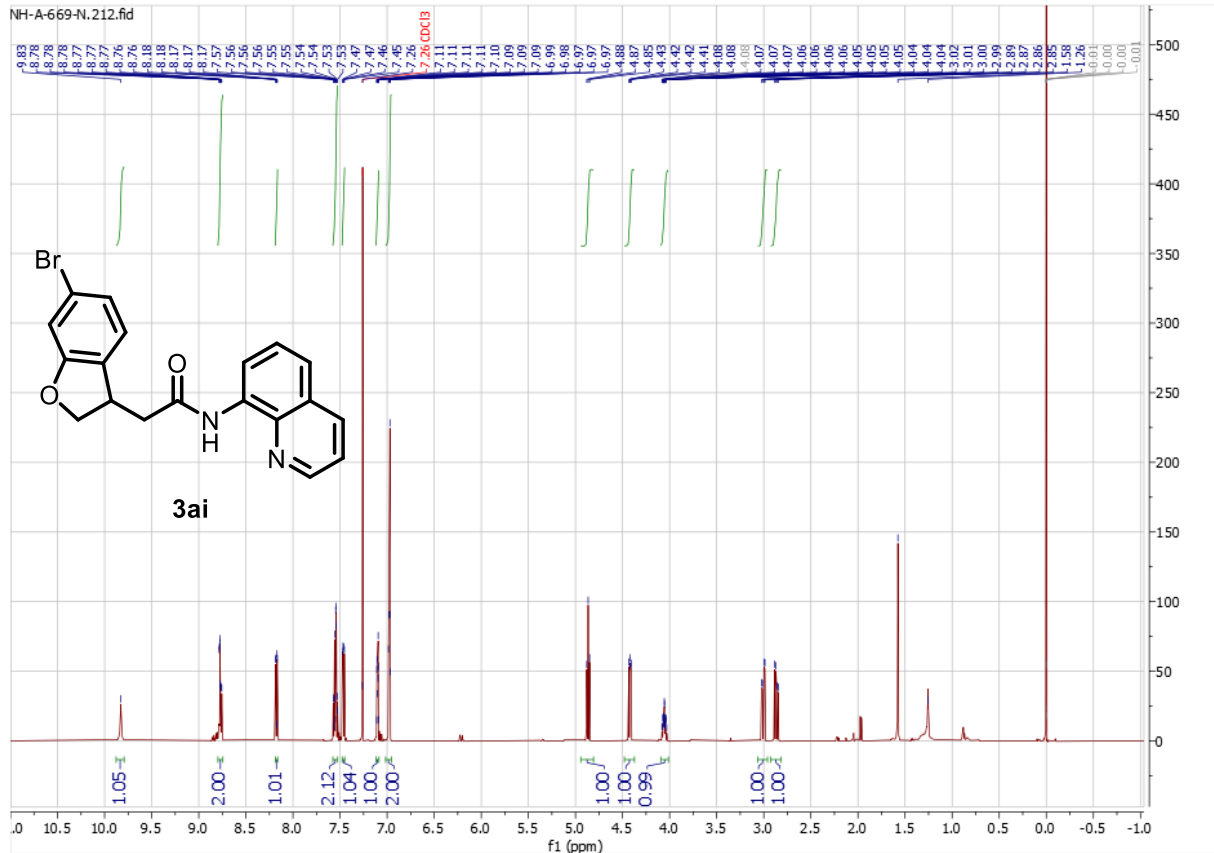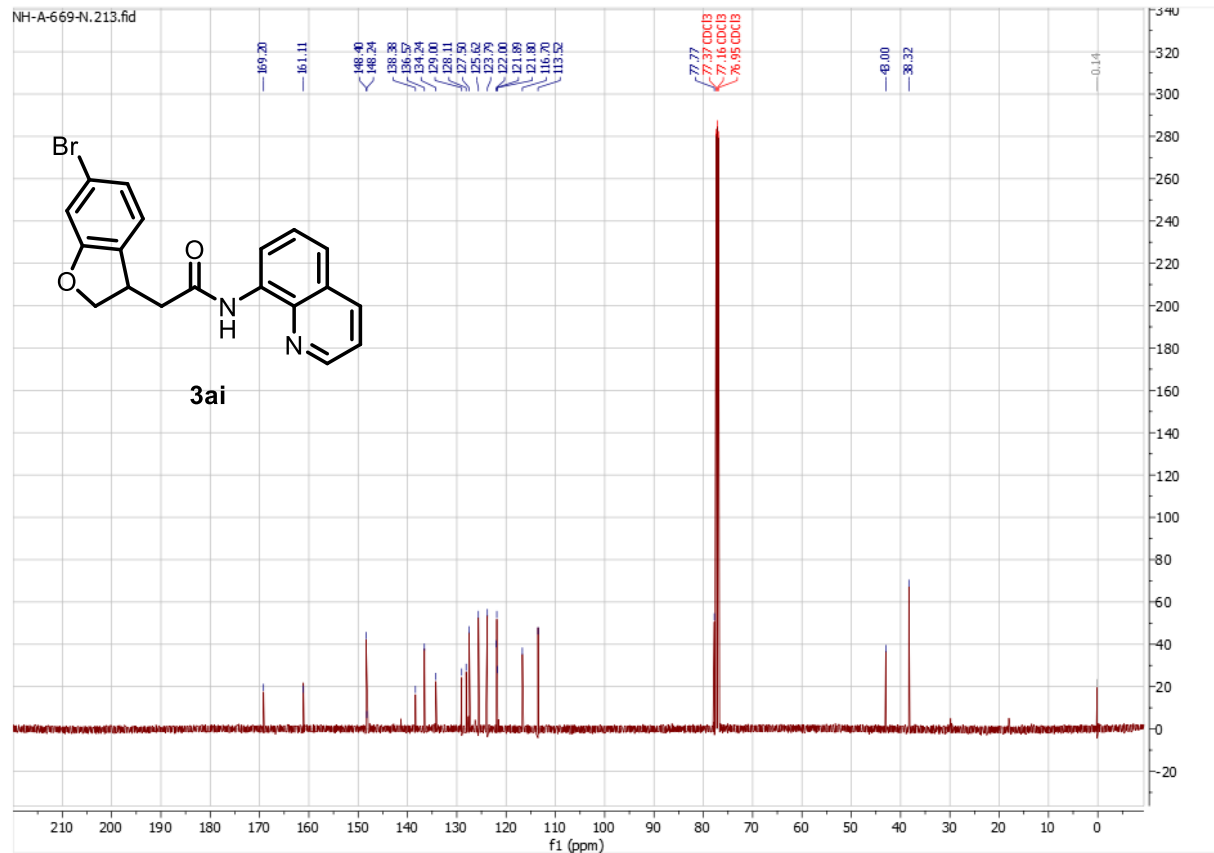

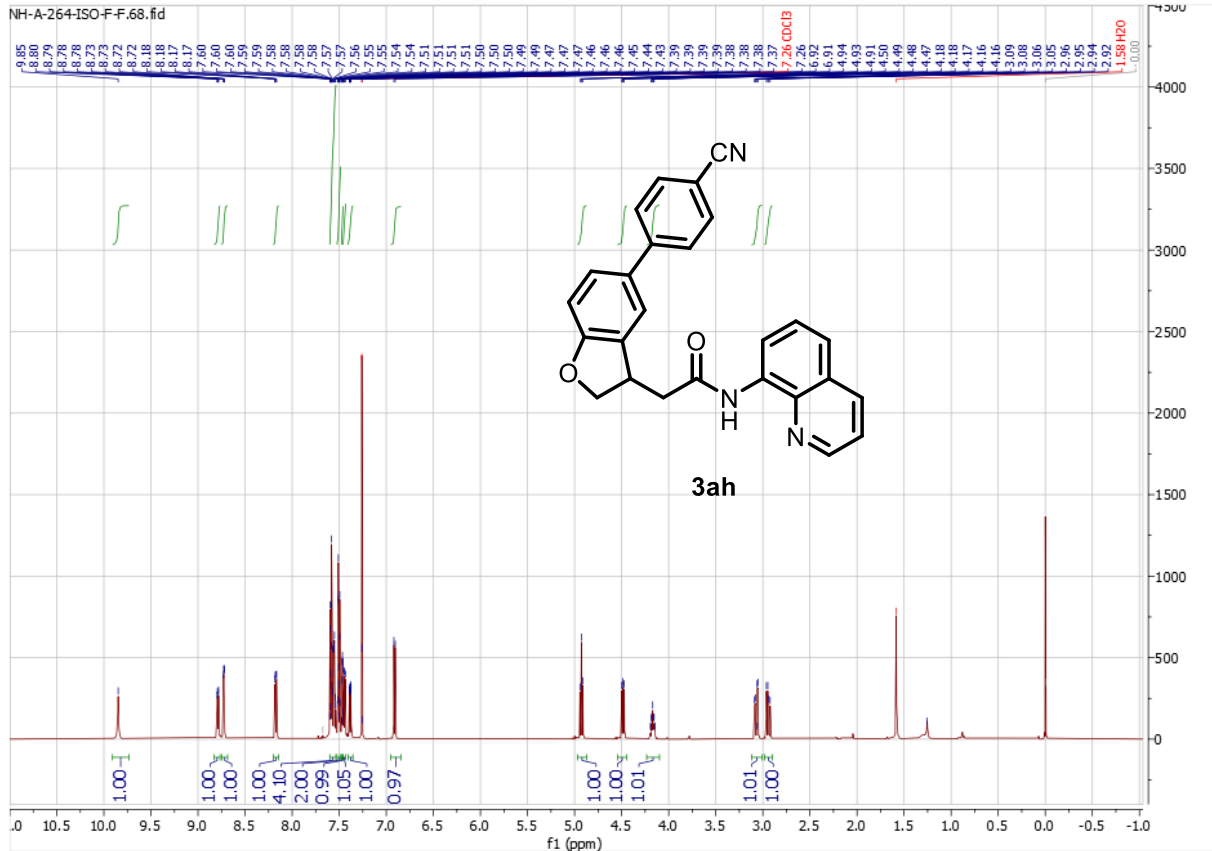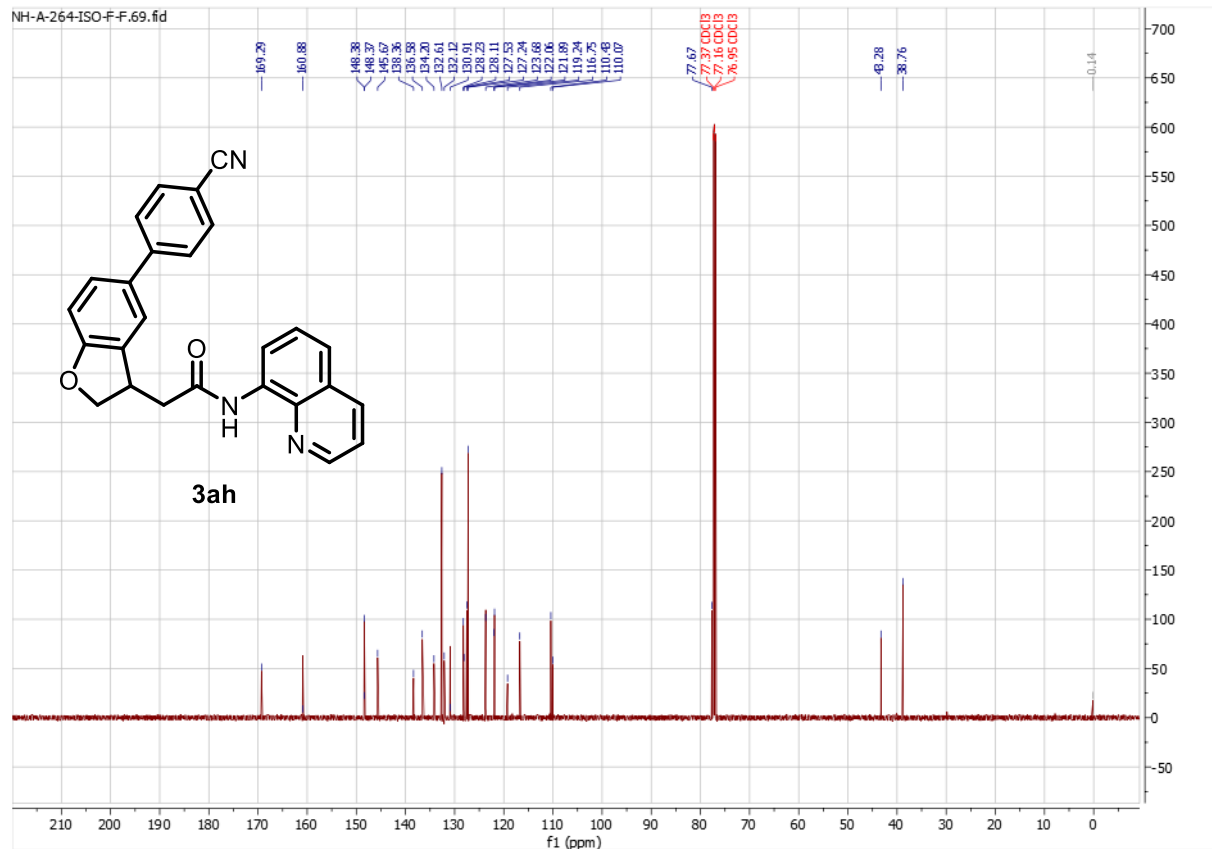

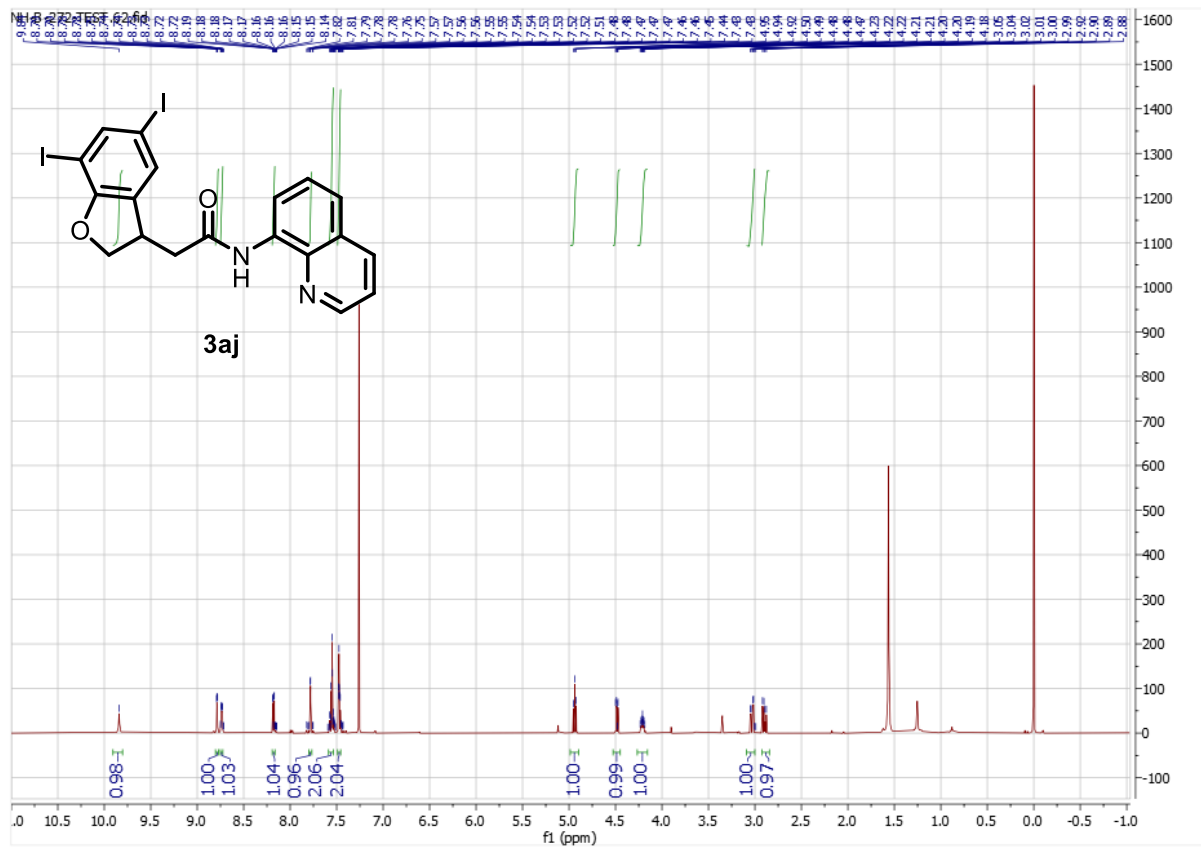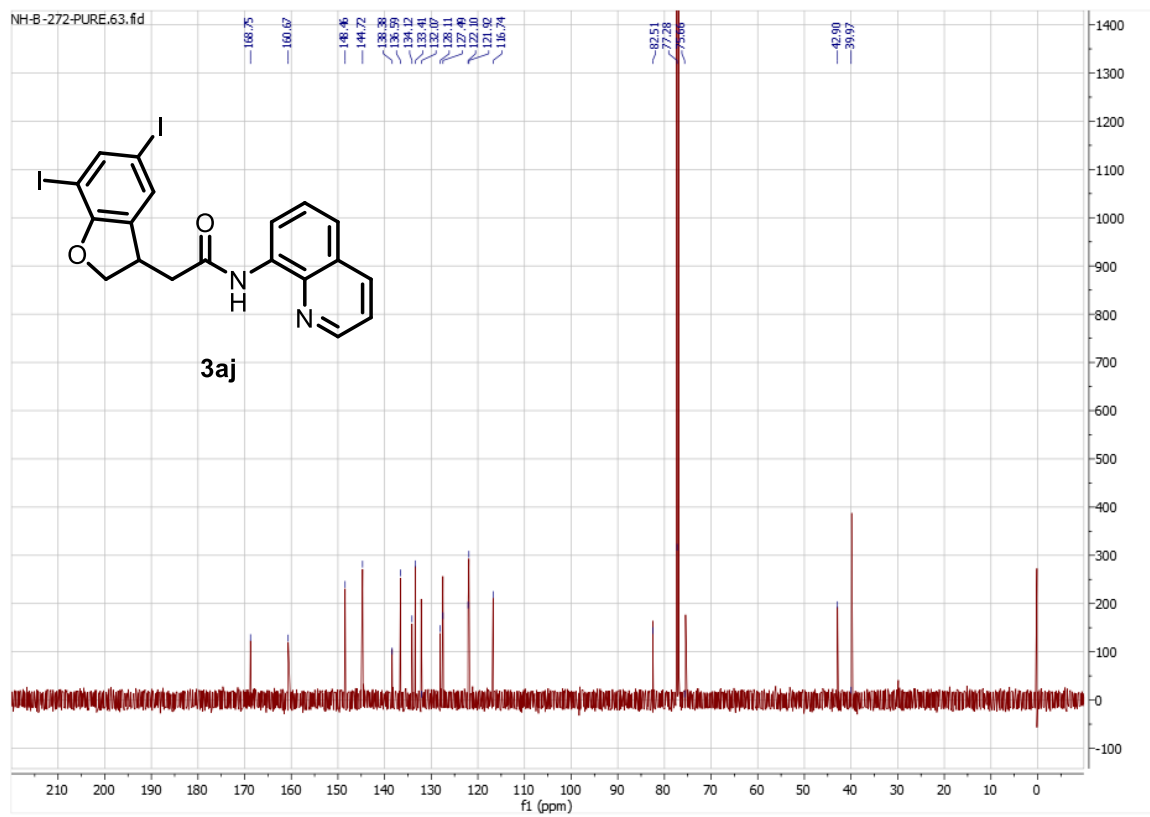



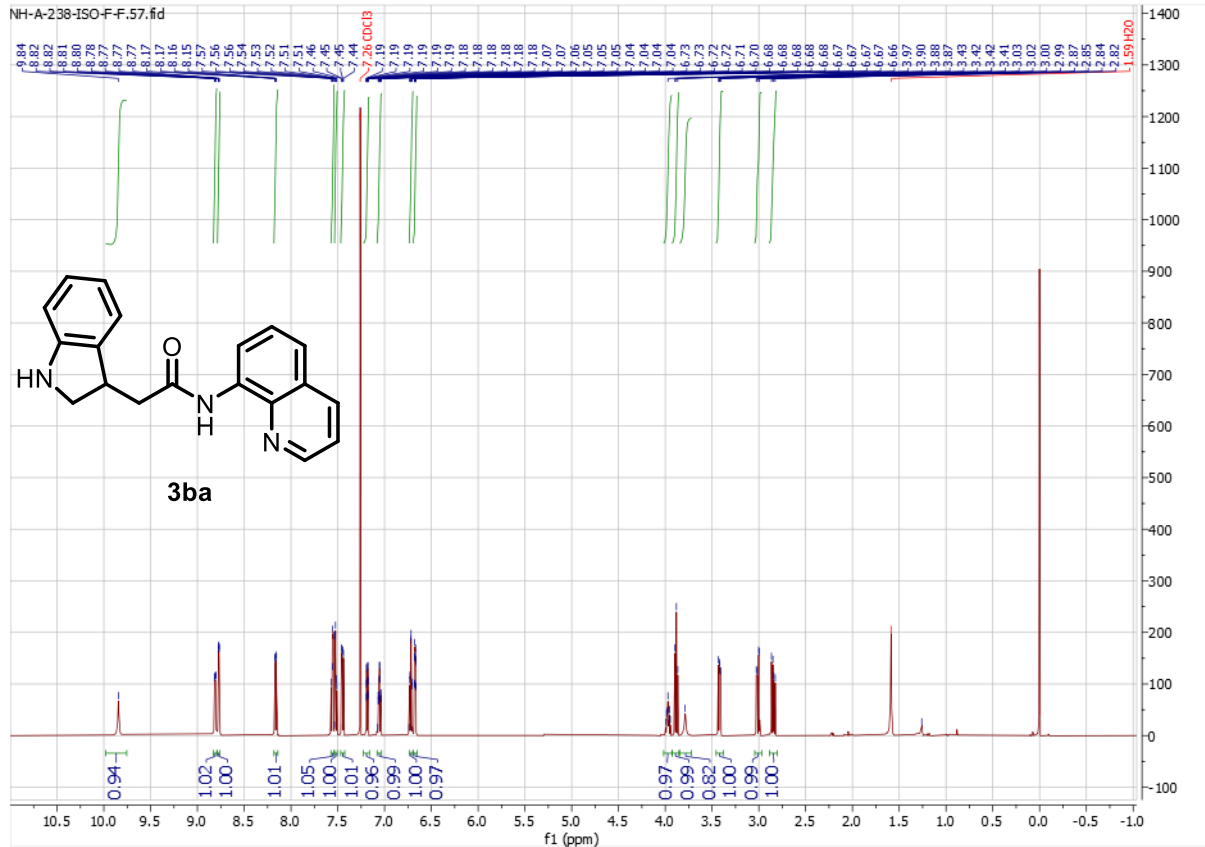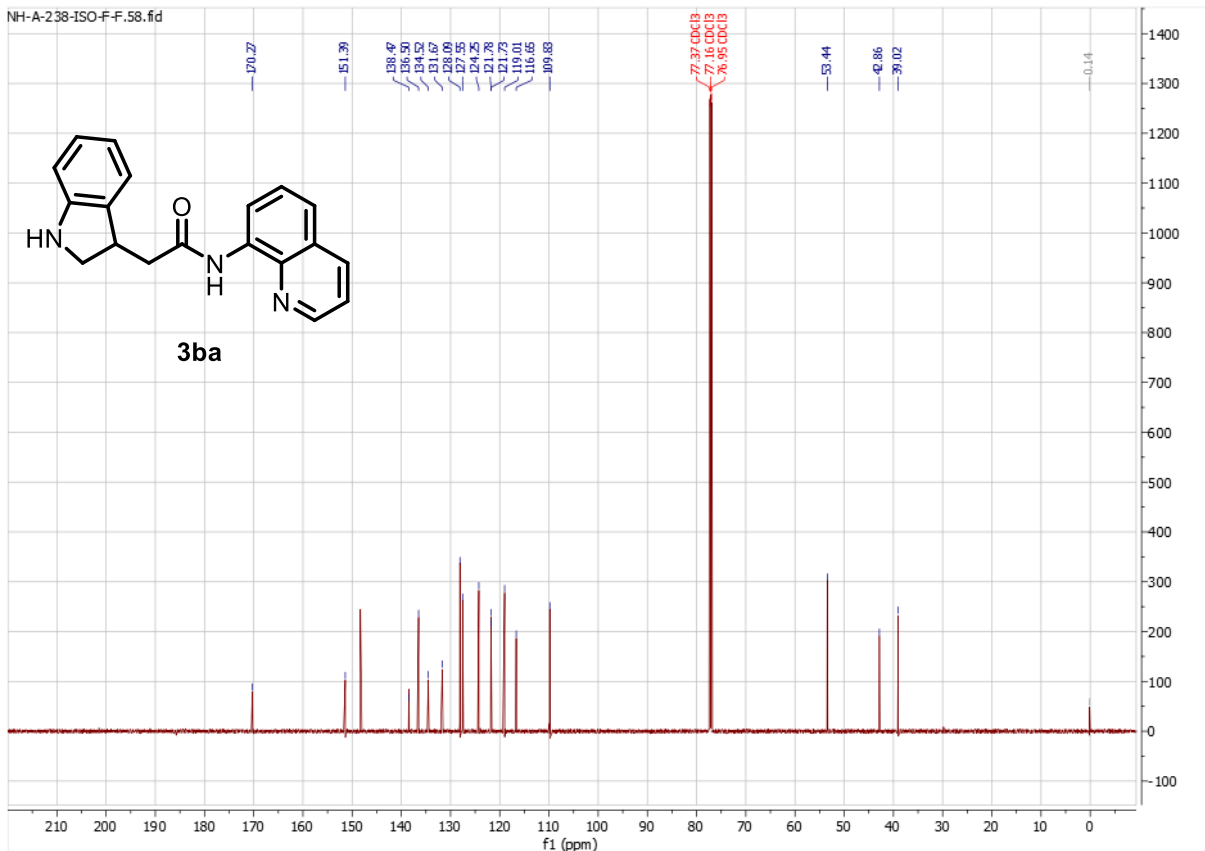

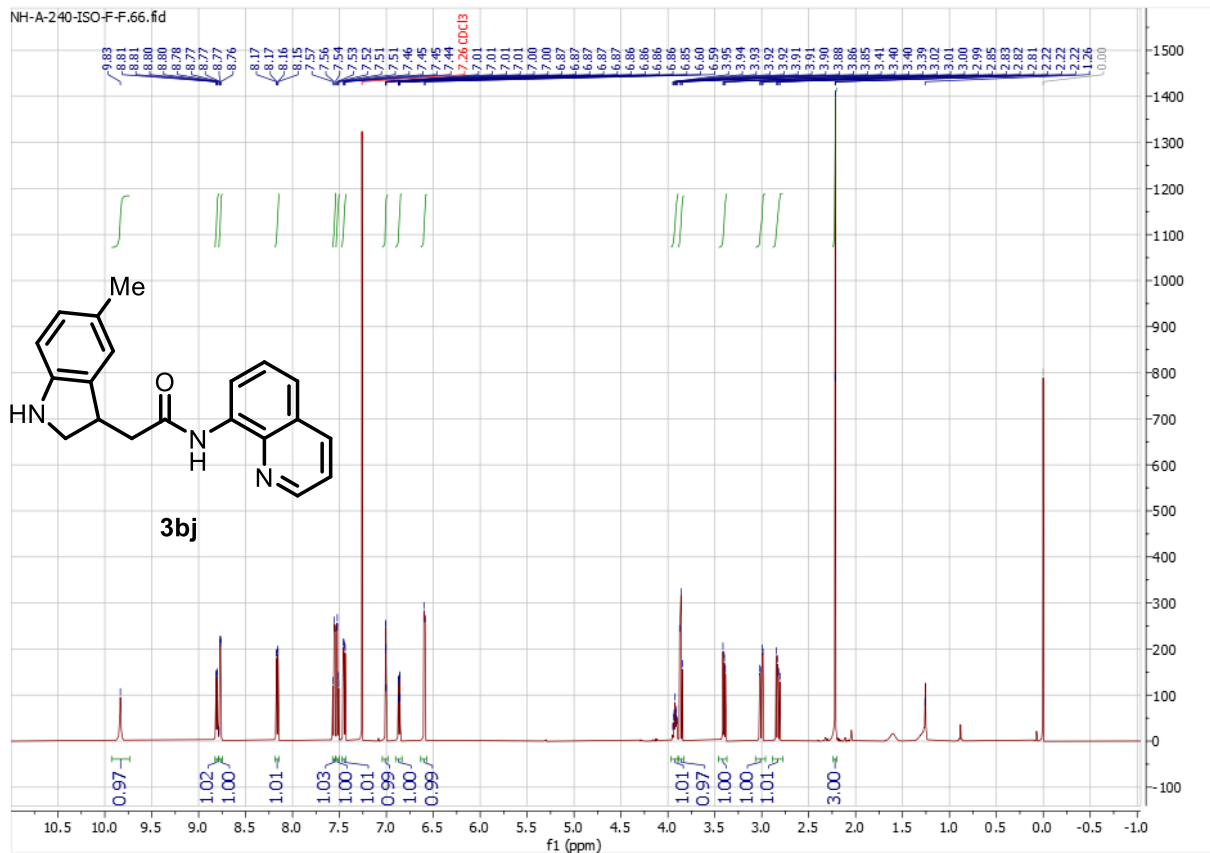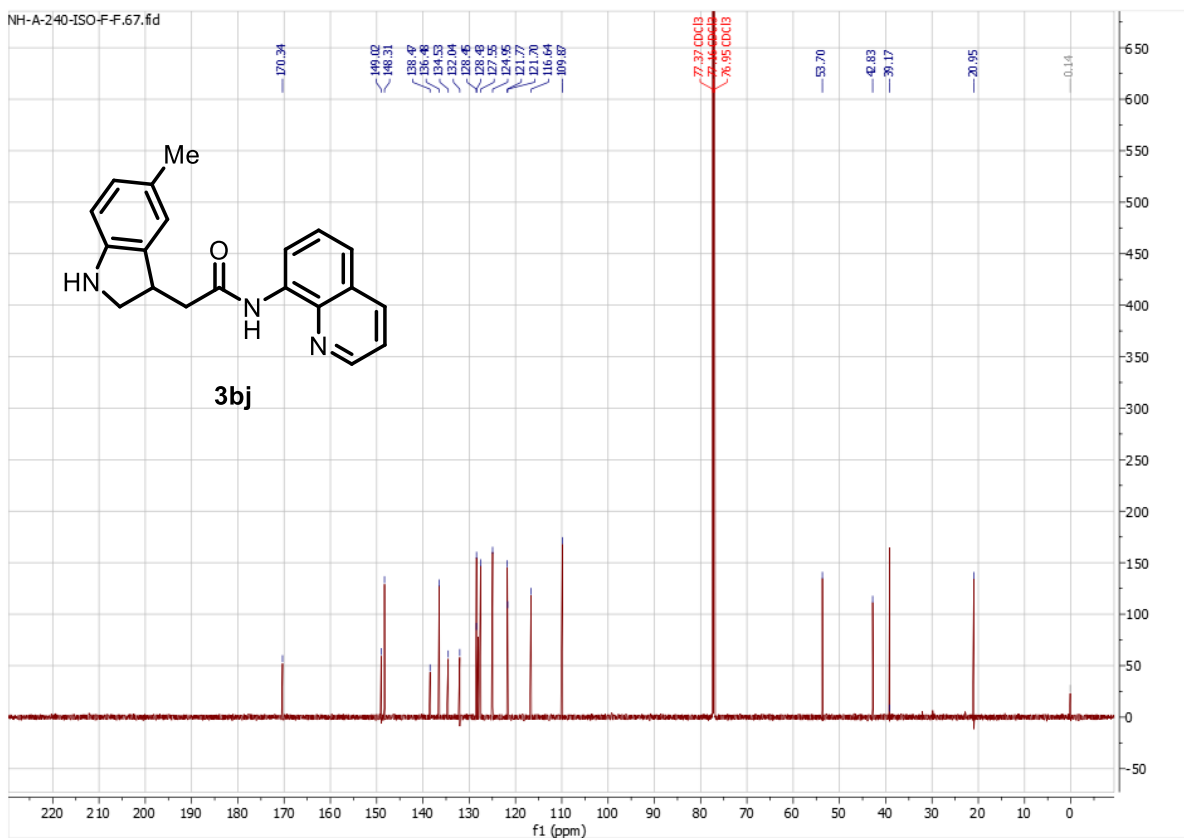

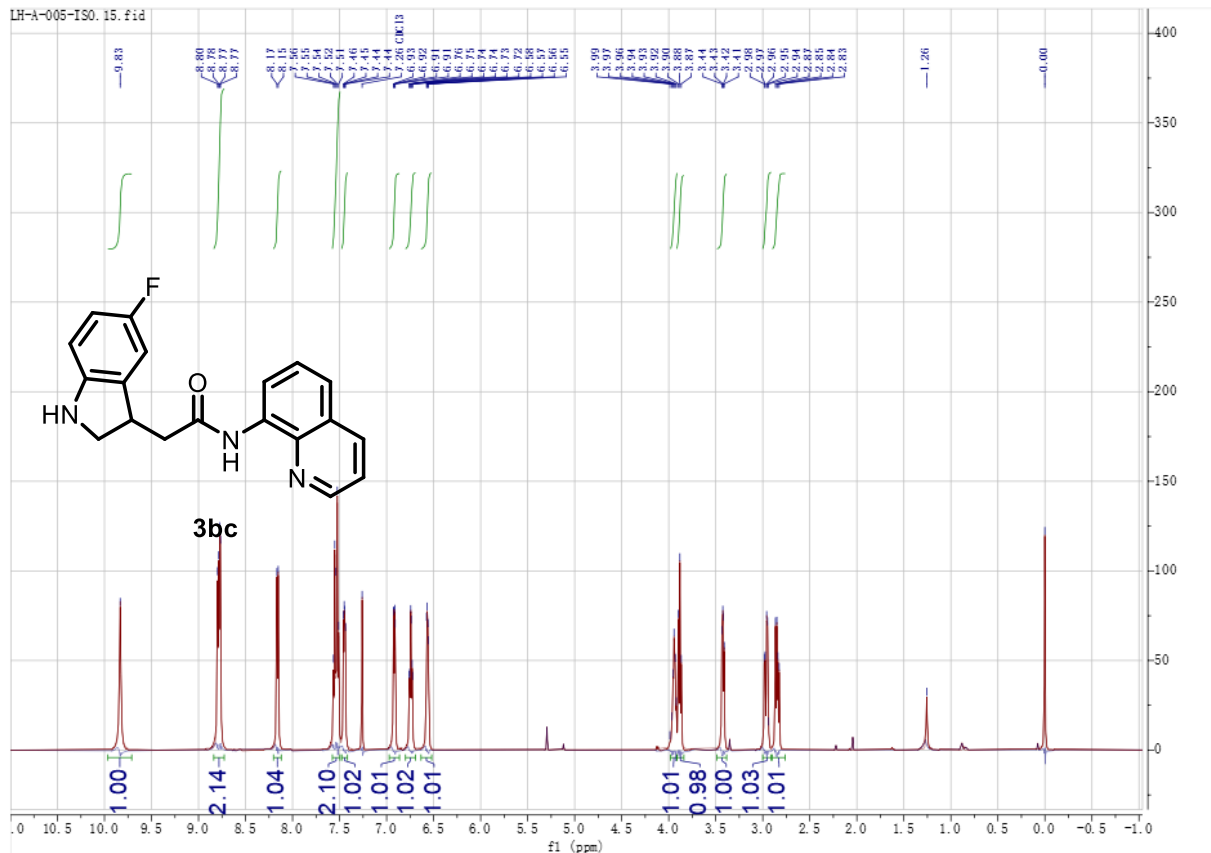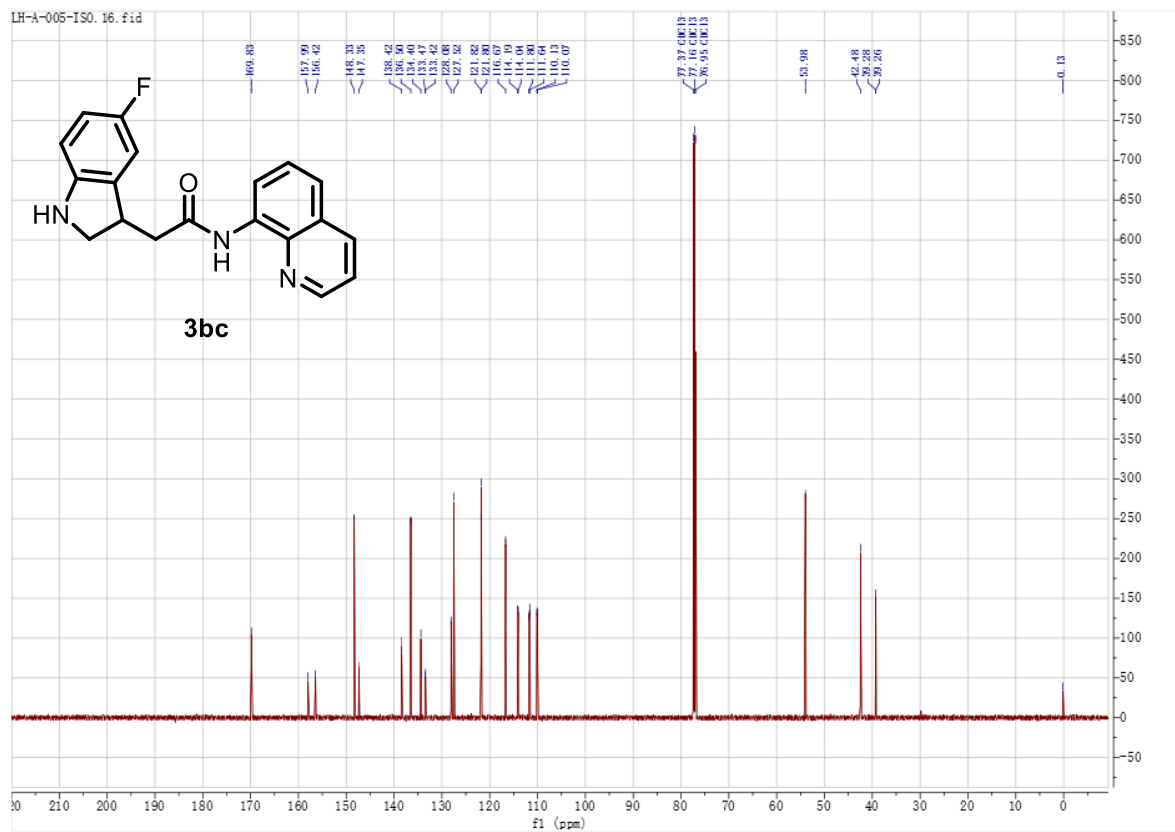

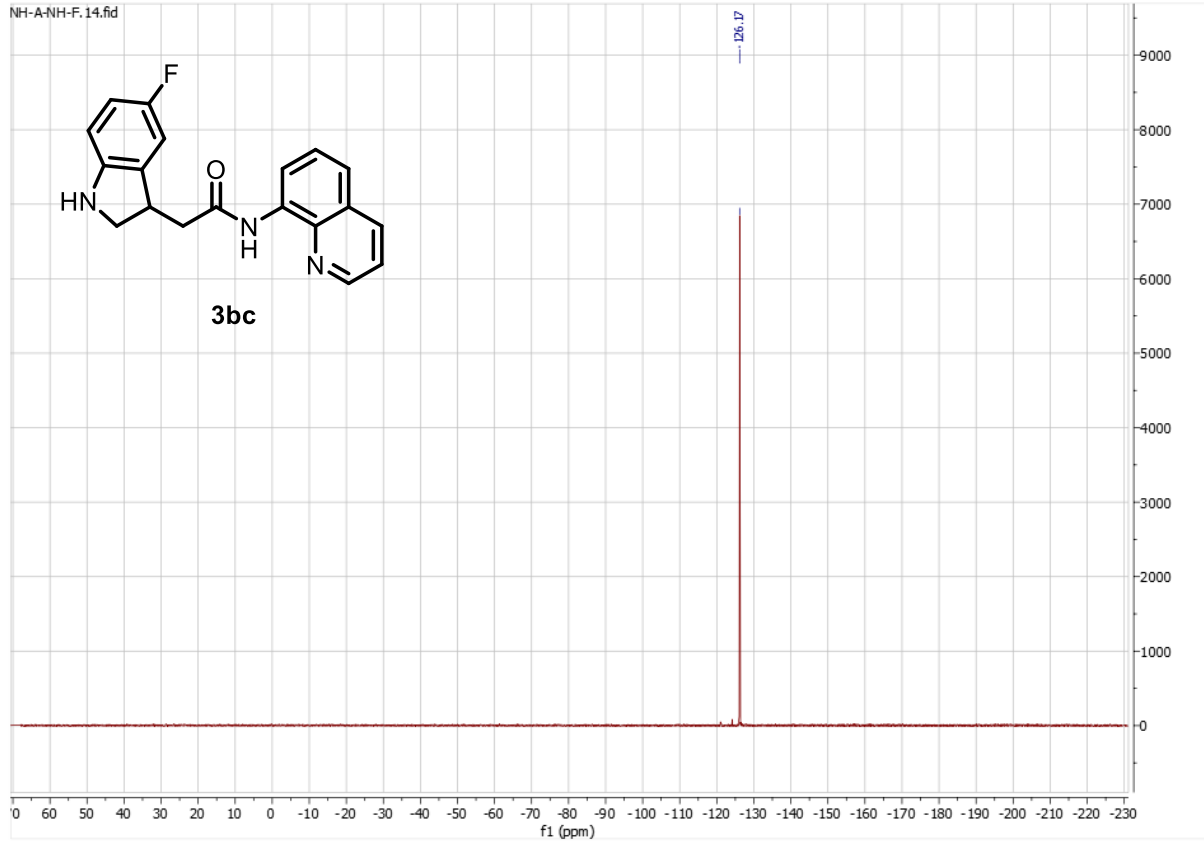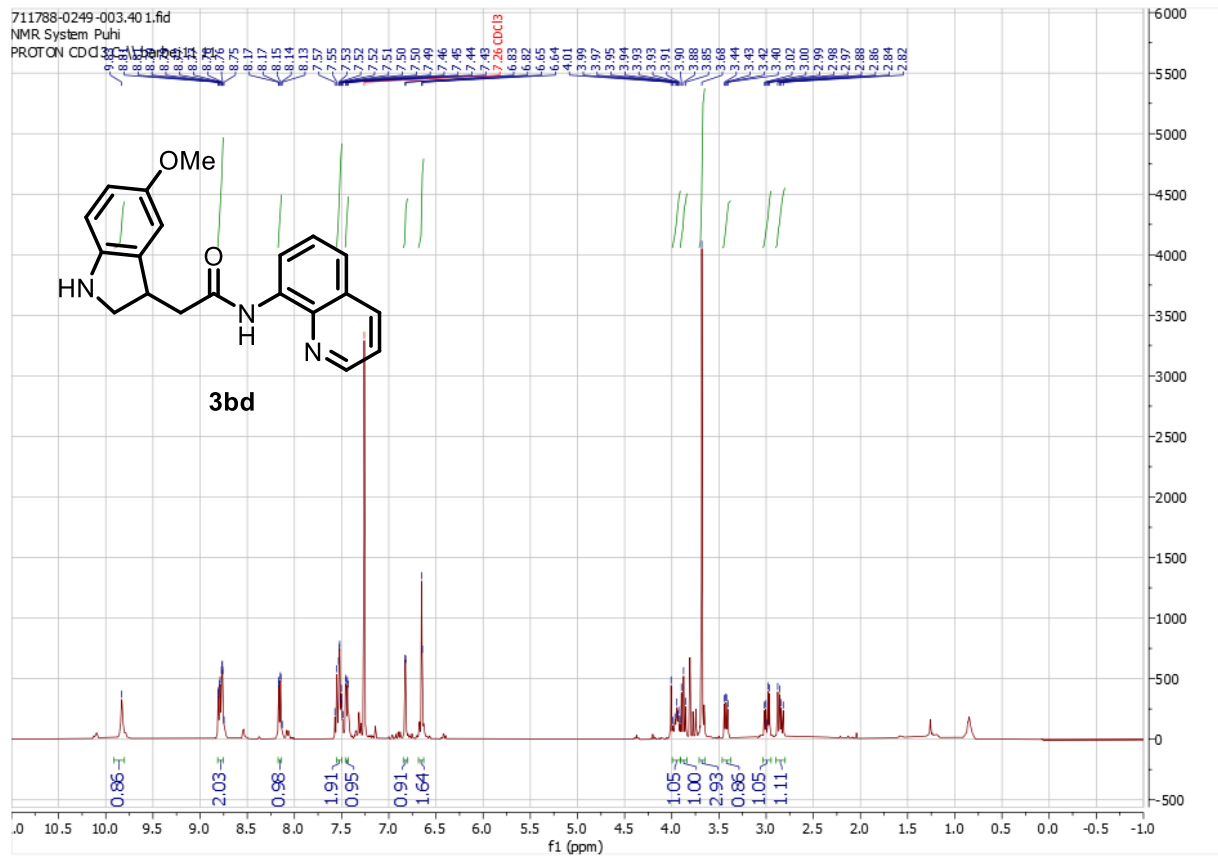

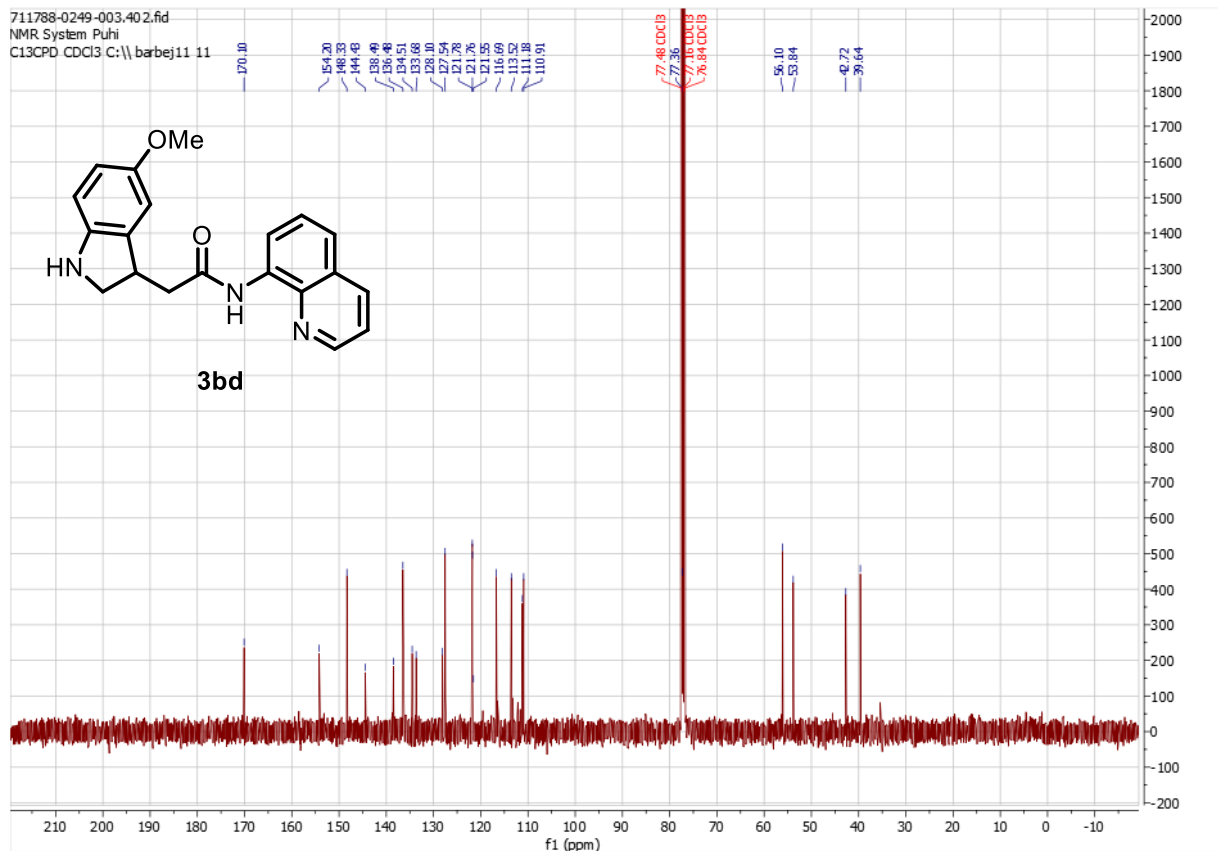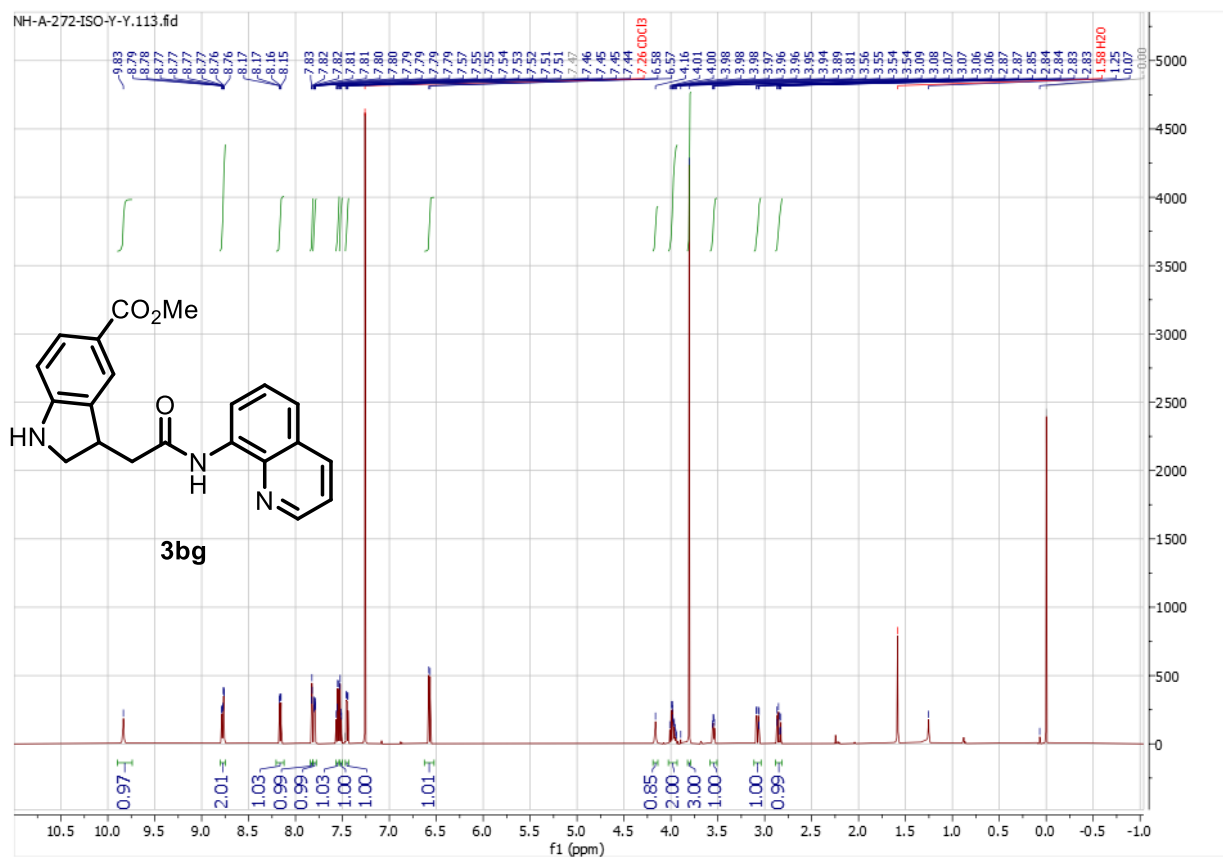

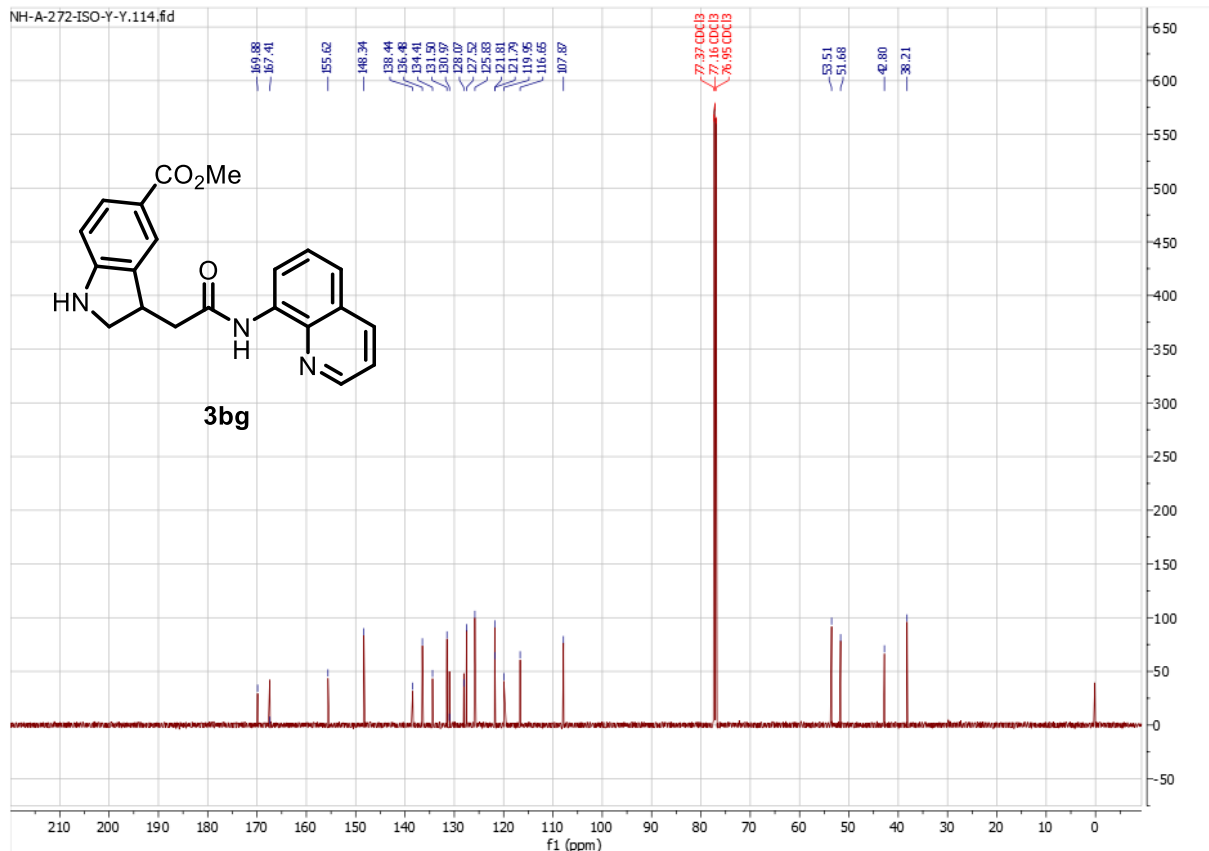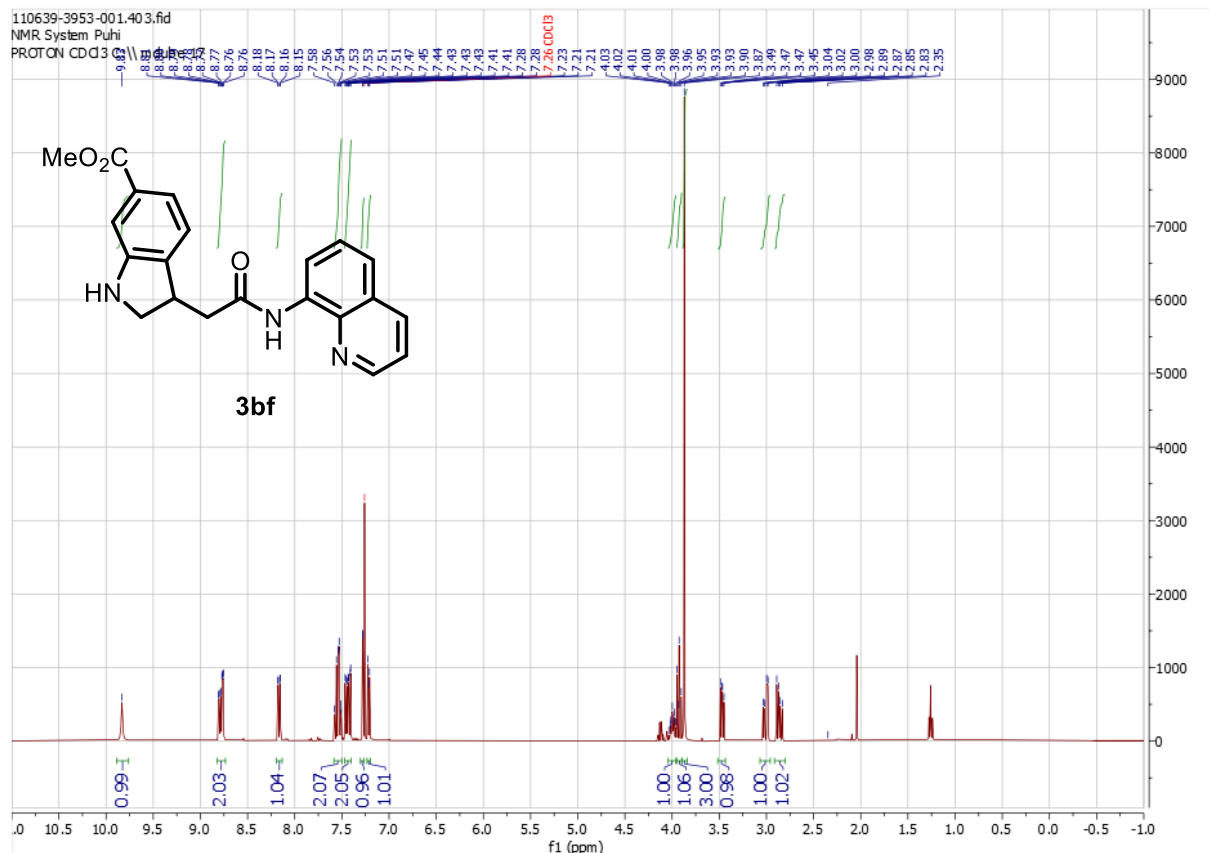

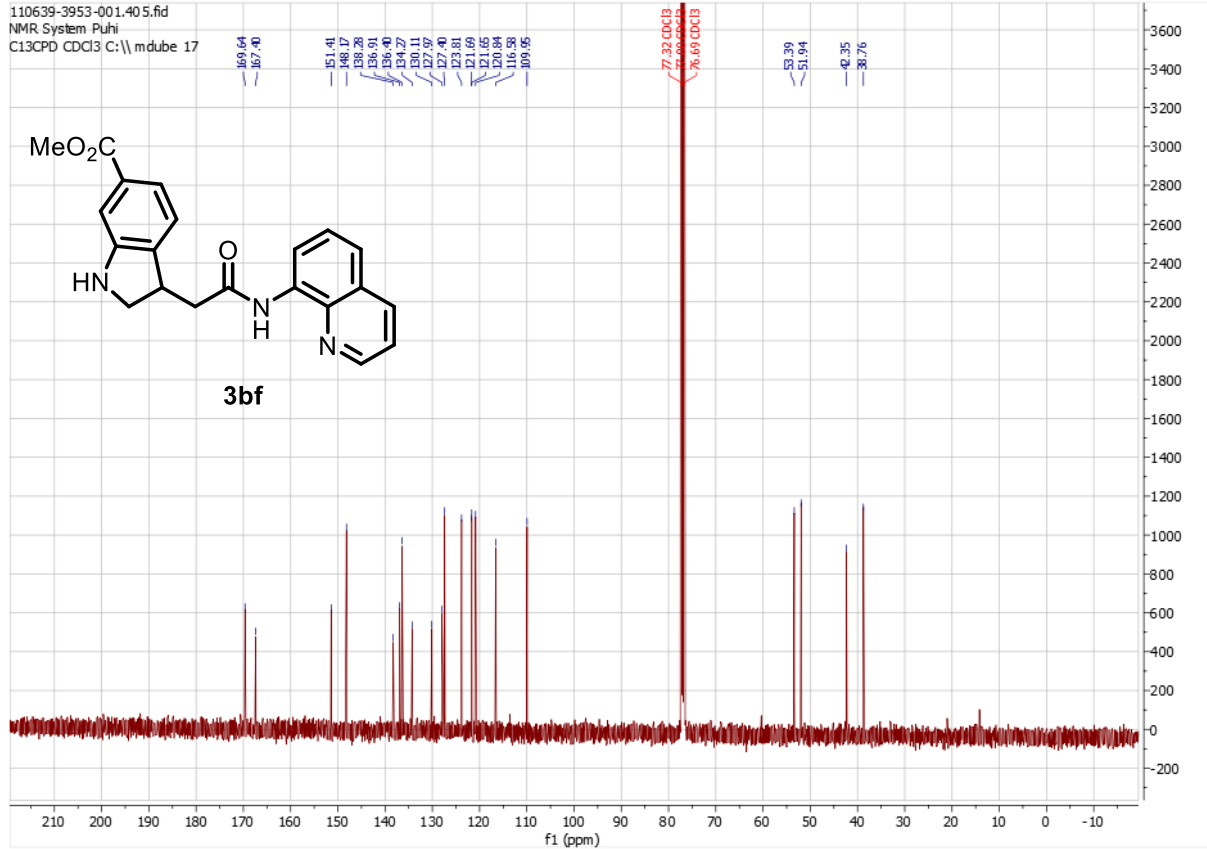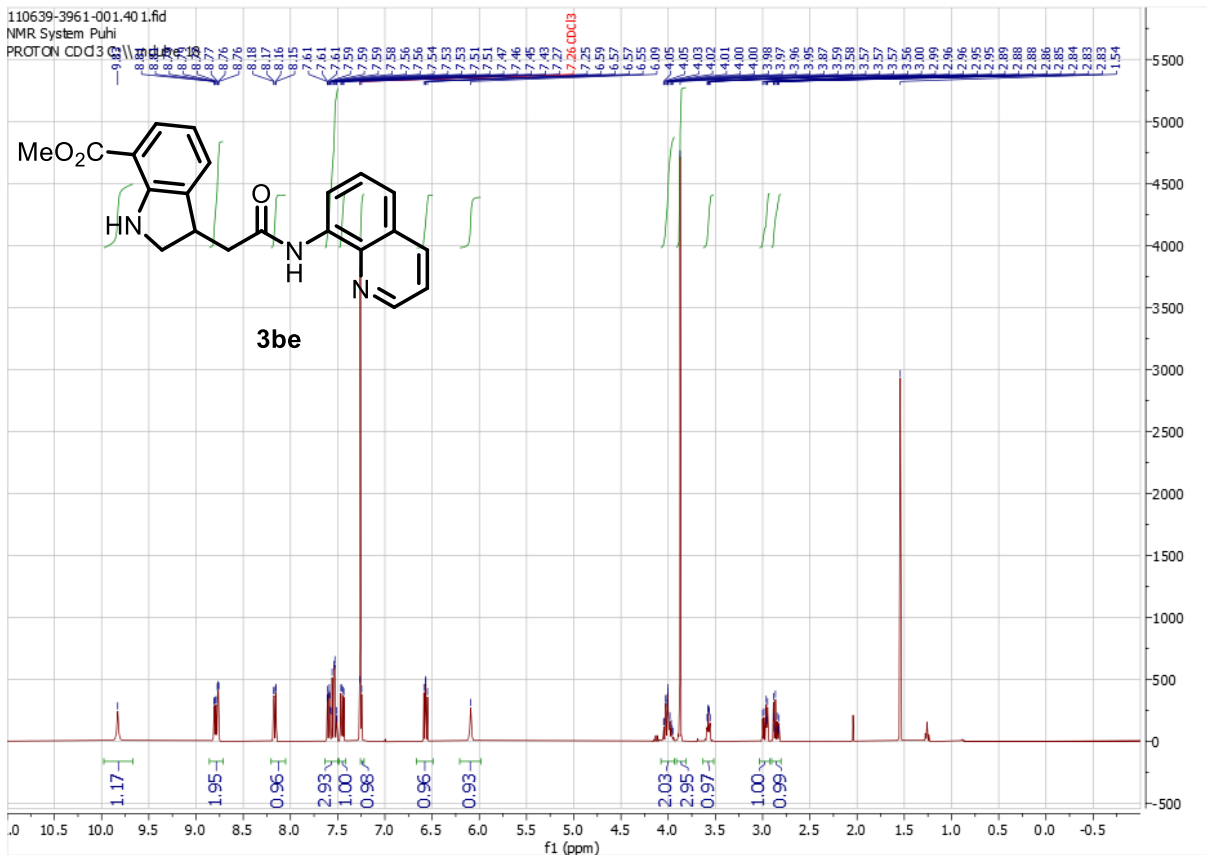

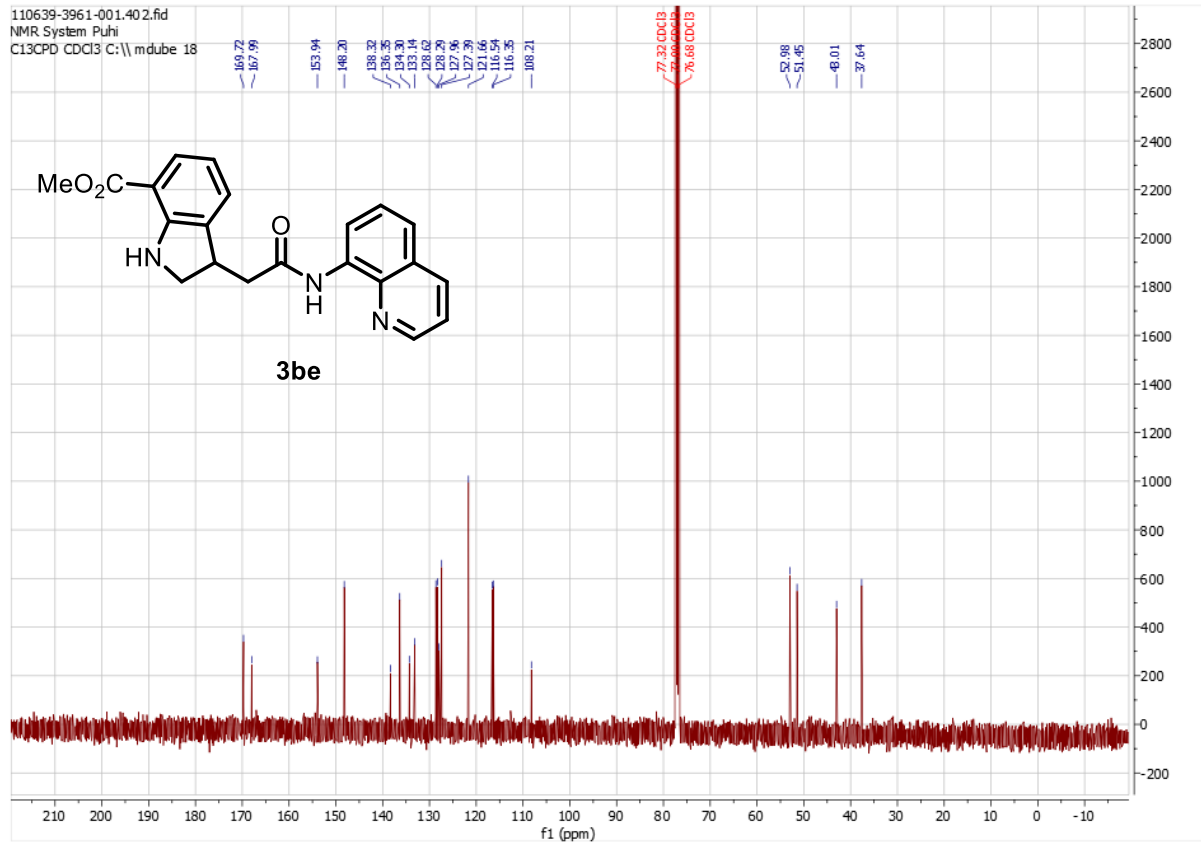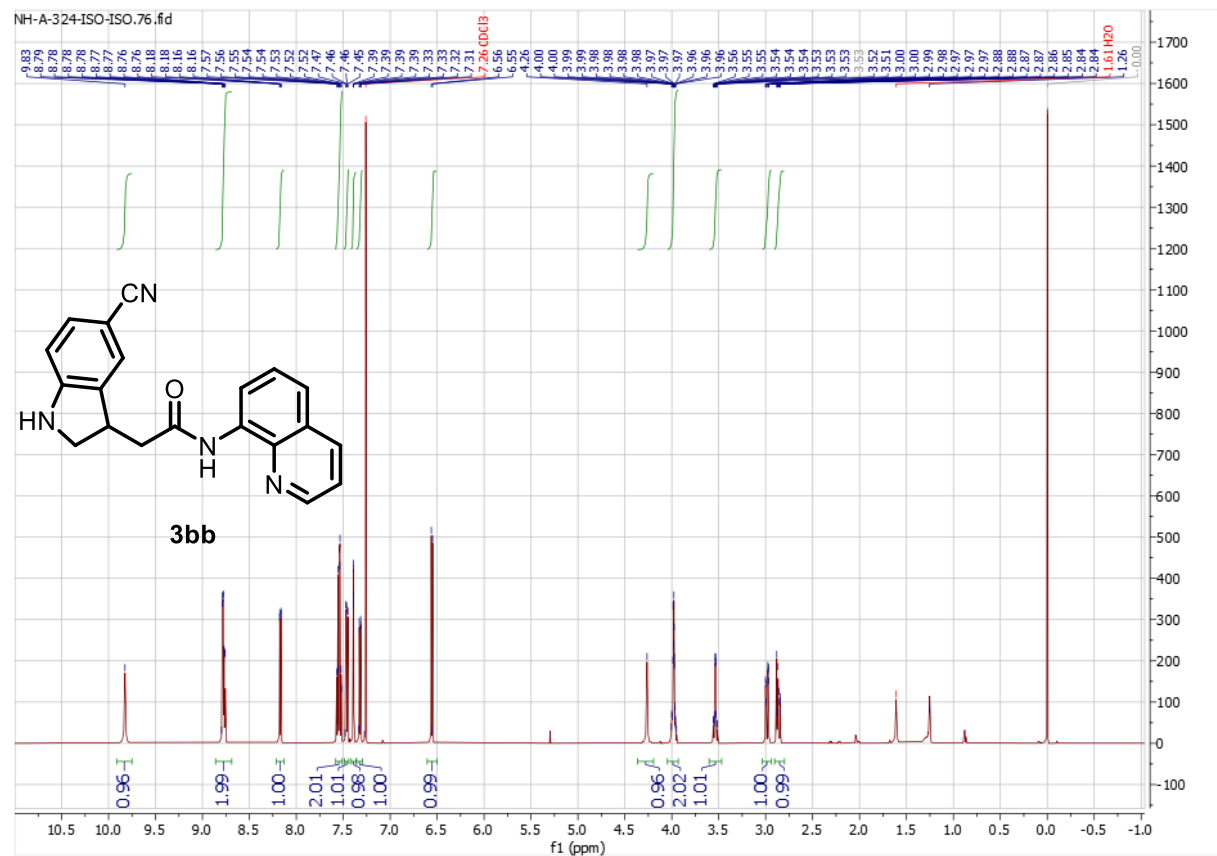



NH-A-324-ISO-ISO.77.fid

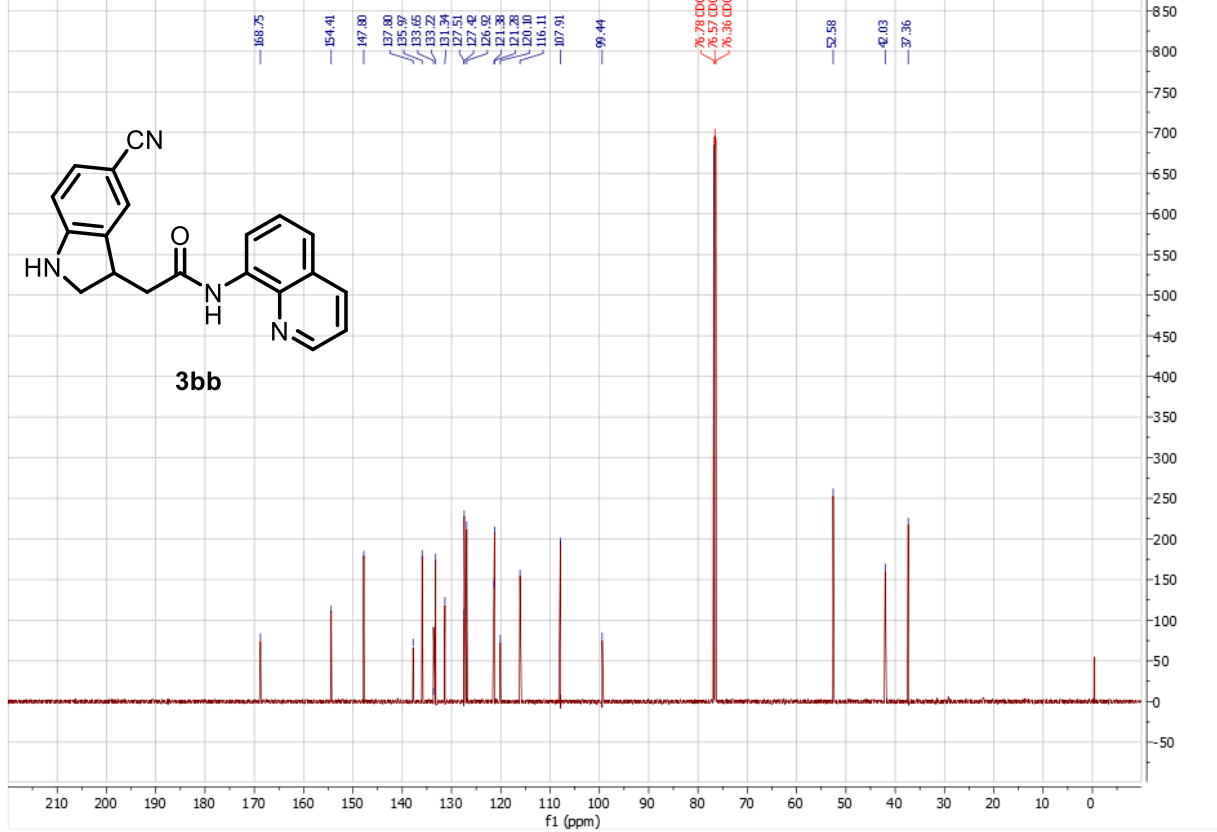

LH-A-004-ISO-N 34.fid

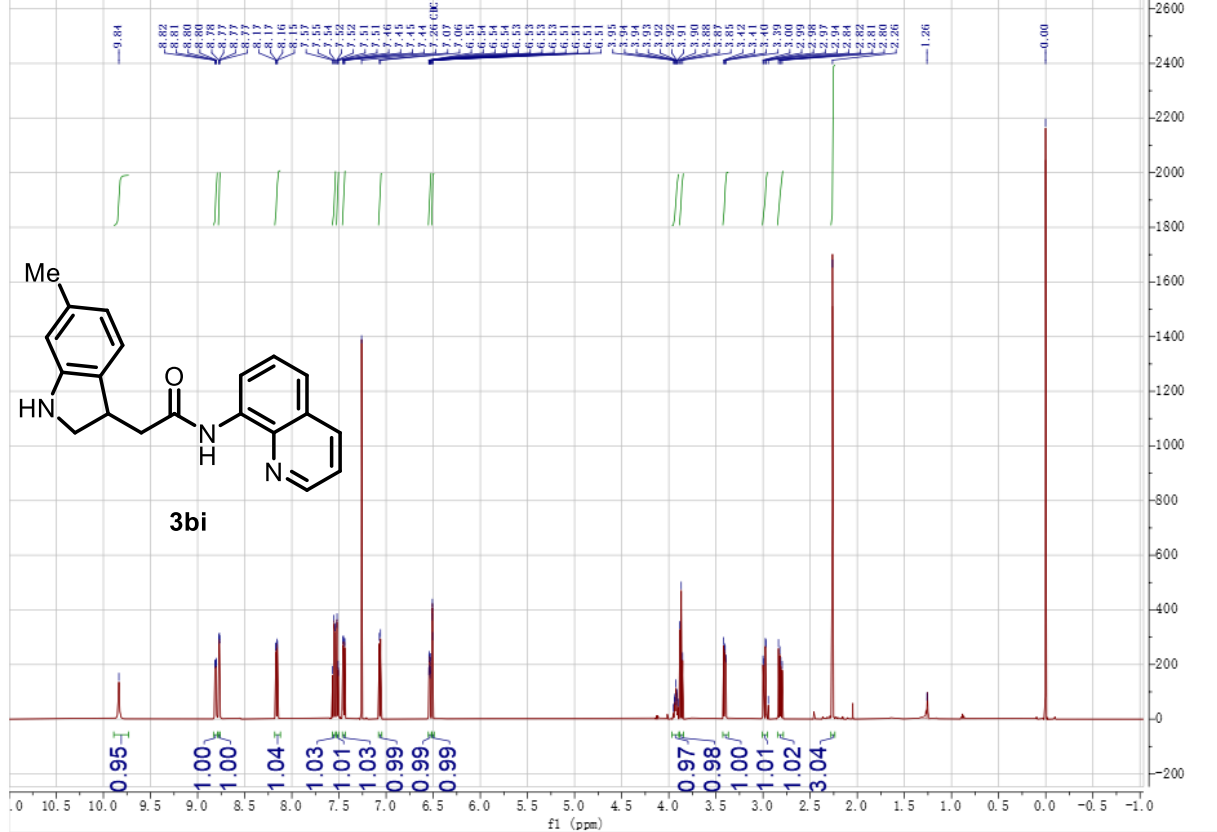

LH-A-004-ISO-N 35.fid

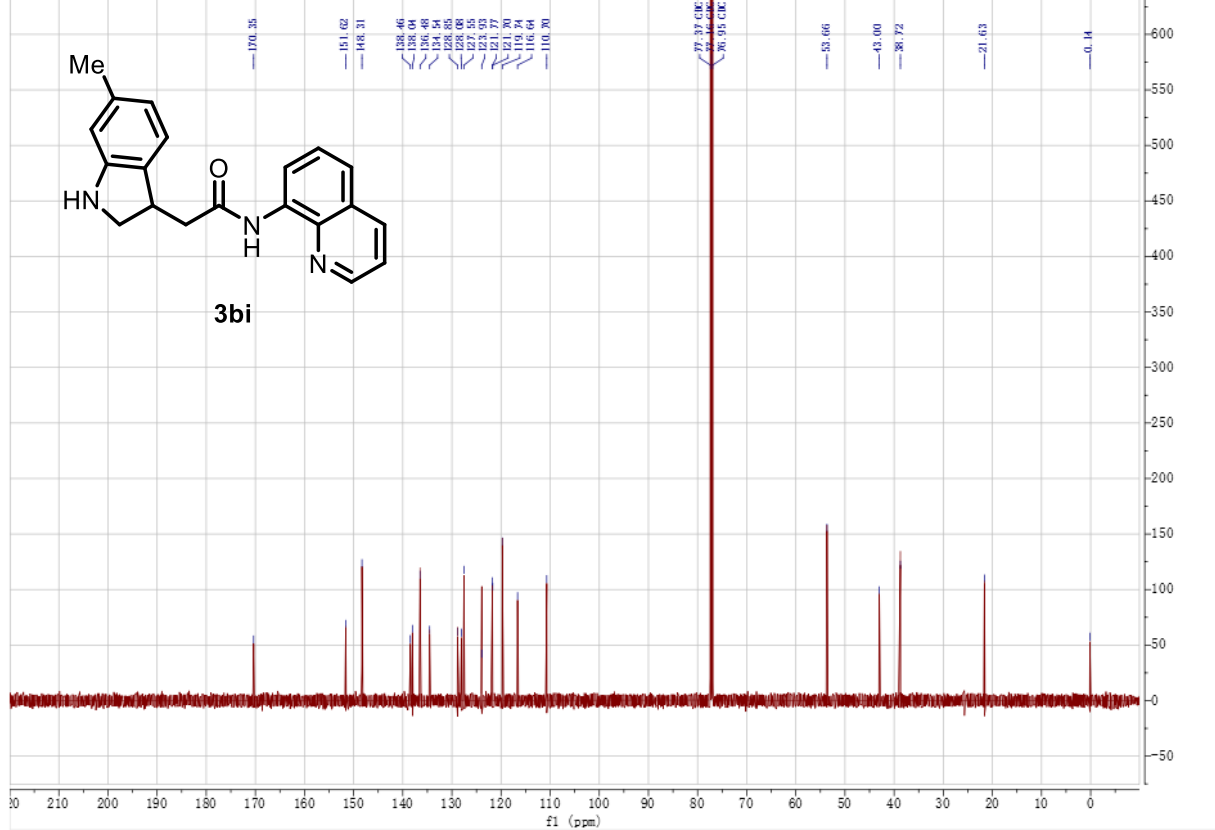

110639-3982-001.401.fid

NMR System Puh1

PROTON CDCl<sub>3</sub>

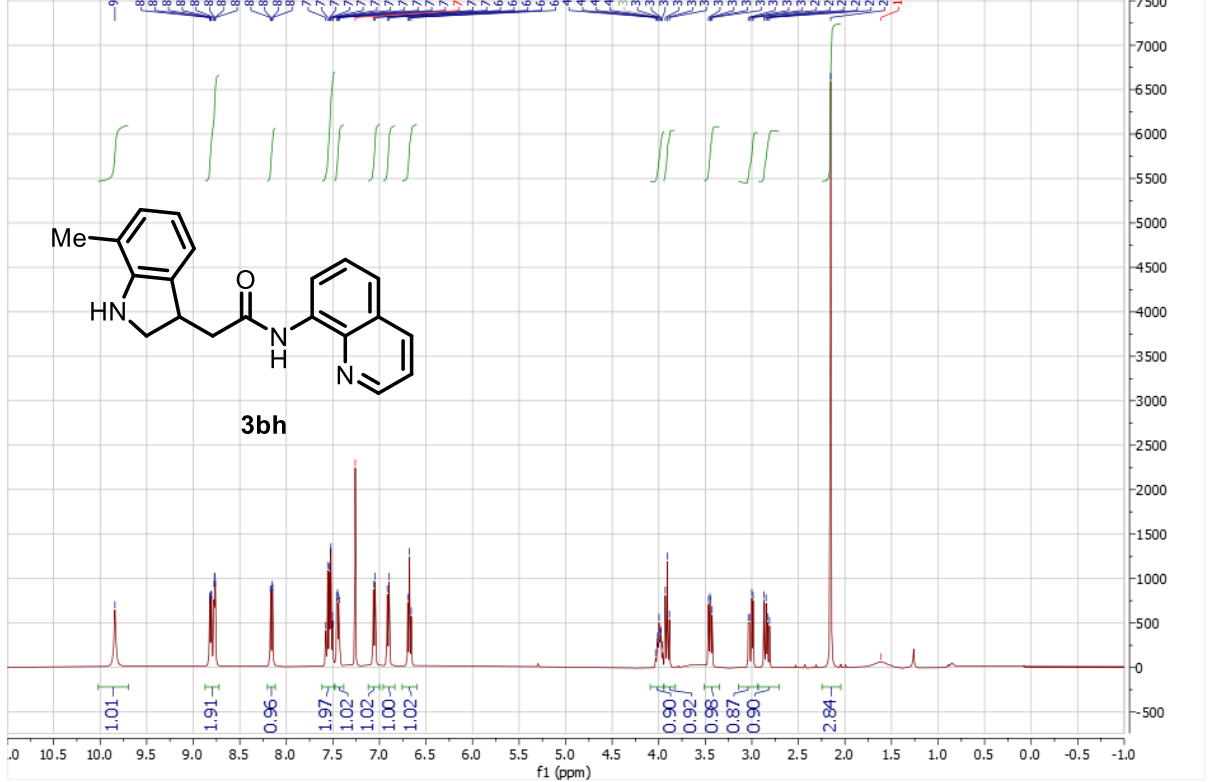

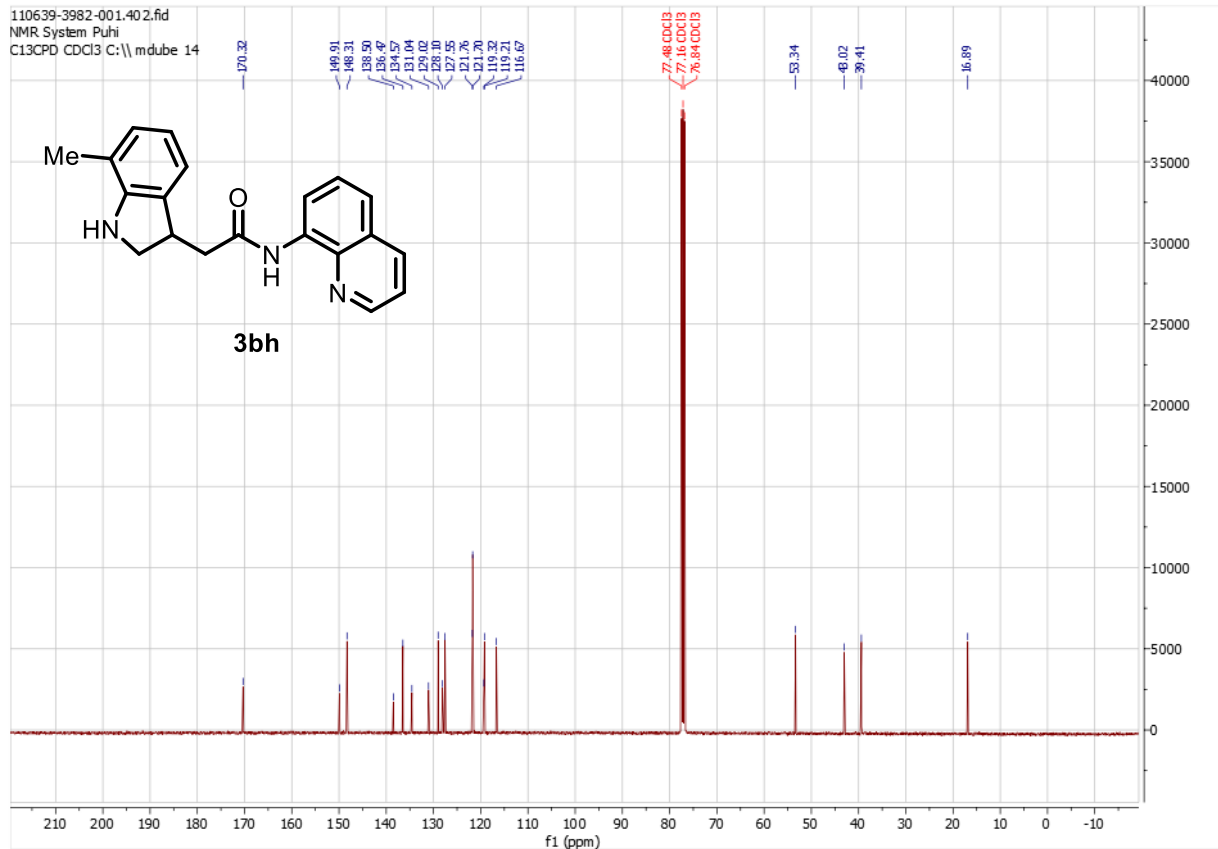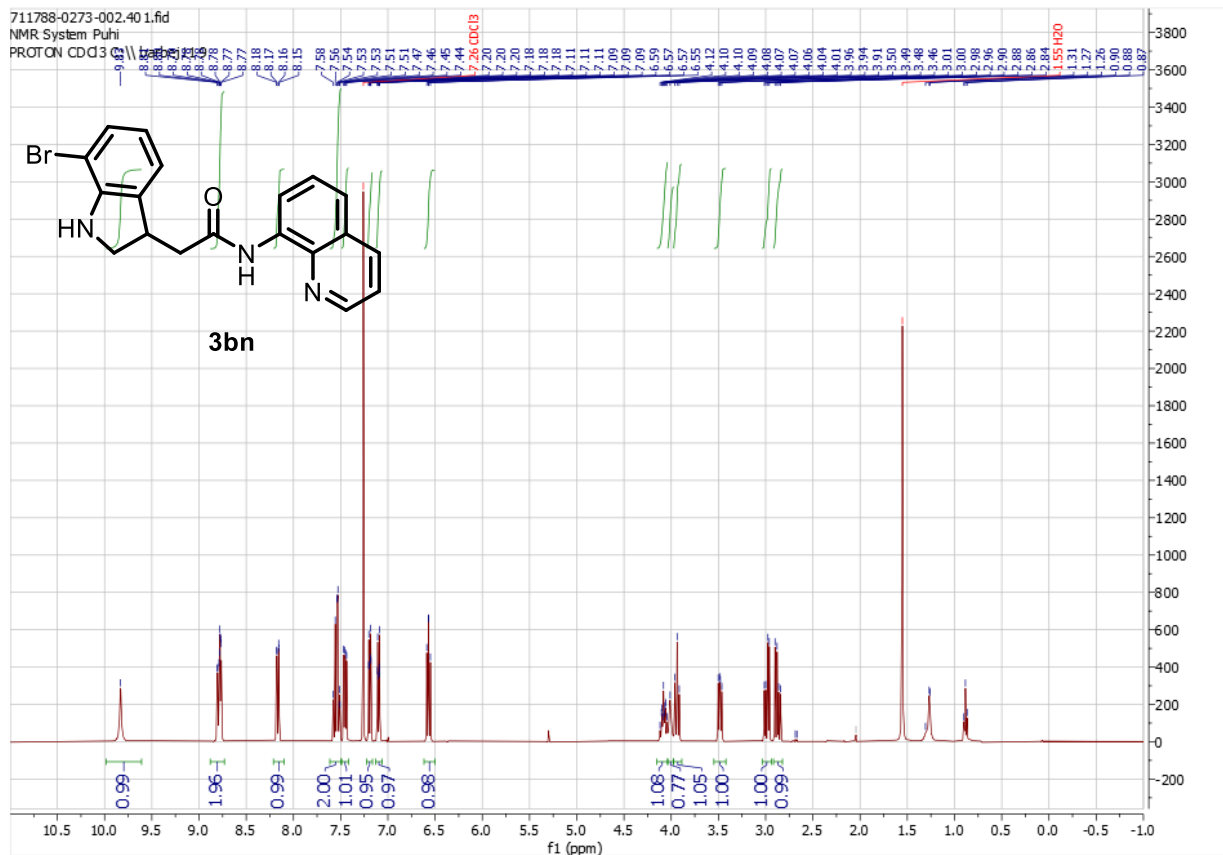



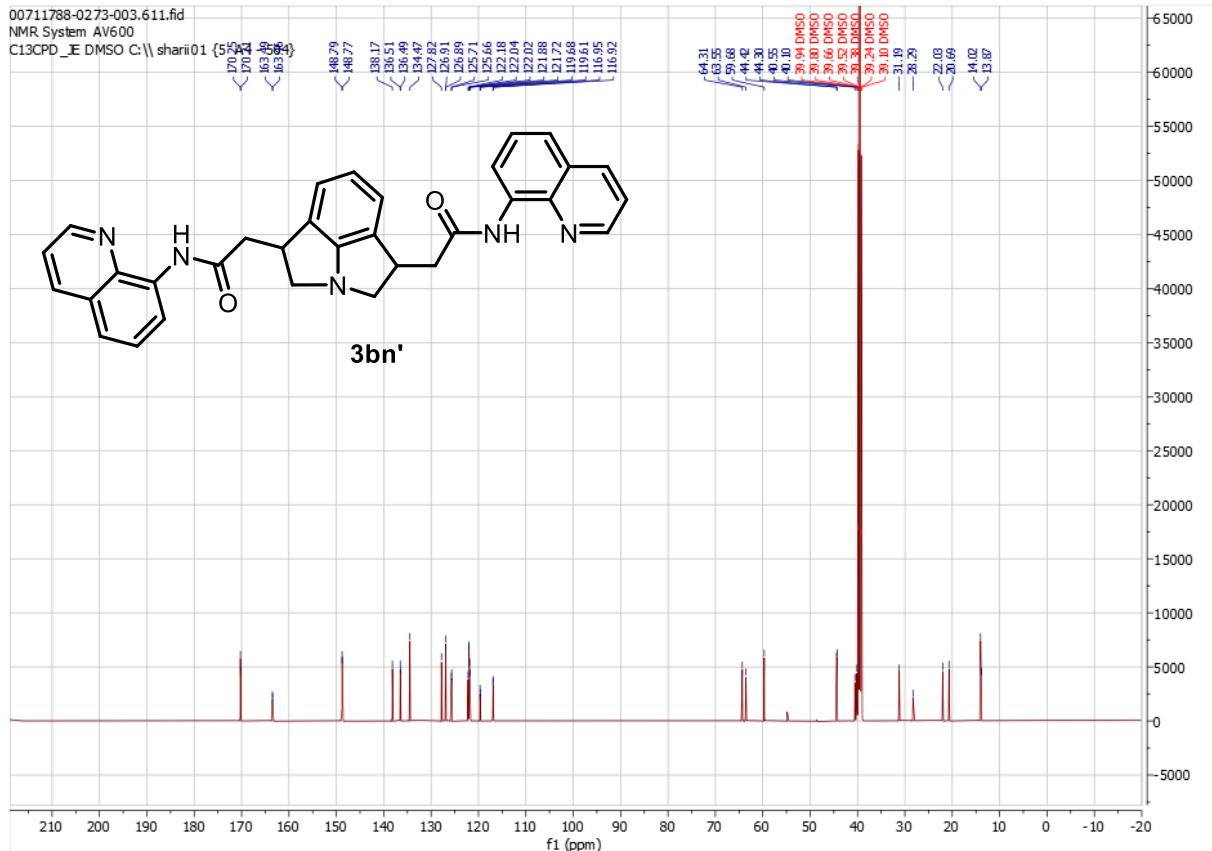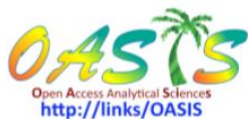

Spectrum is consistent with proposed structure.  
Impurities observed: Ethyl acetate and hexane

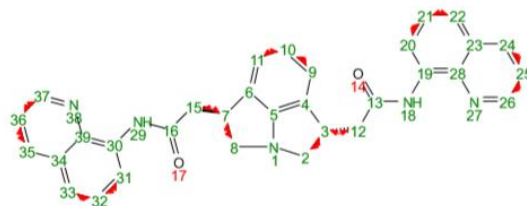

00711788-0273-003.604.ser — NMR System AV600 — COSYGPSW\_E DMSO C:\shari01 {5 A4 - 504}

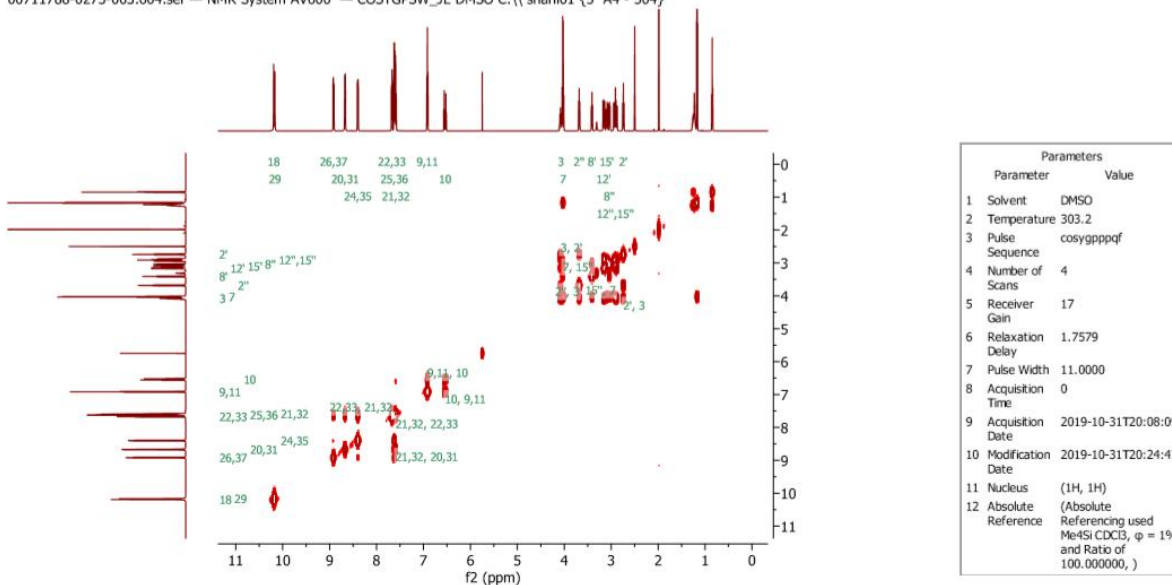

Spectrum is consistent with proposed structure.  
Impurities observed: Ethyl acetate and hexane

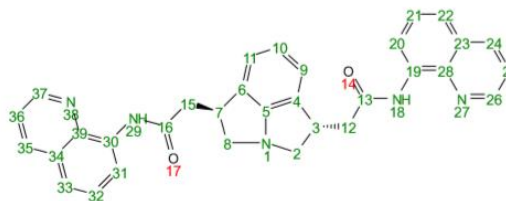

00711788-0273-003.605.ser — NMR System AV600 — HSQCEDETPG\_JE DMSO C:\sharii01 {5 A4 - 504}

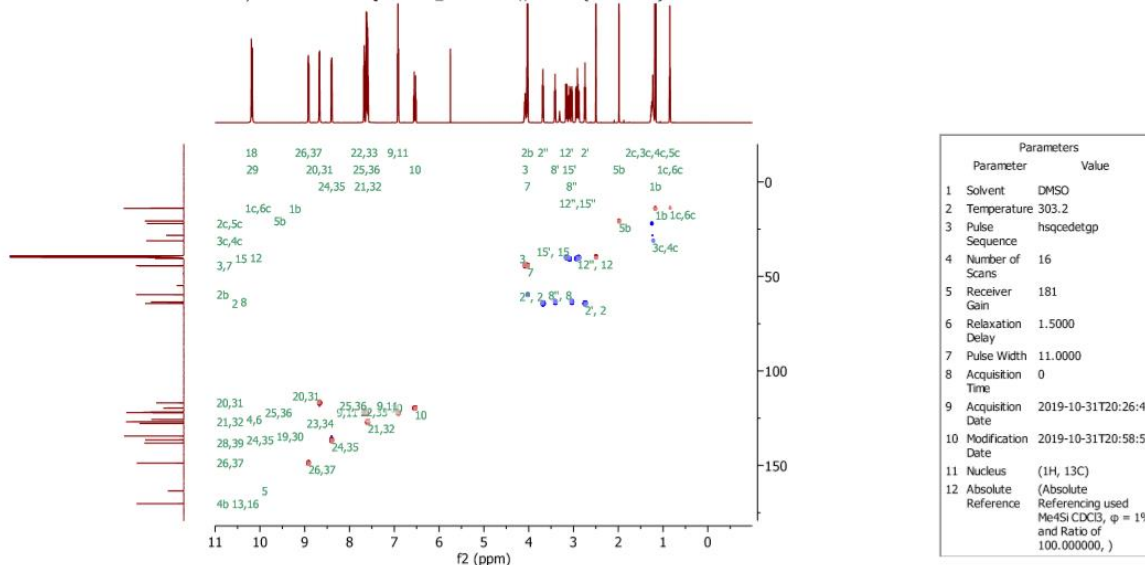

Spectrum is consistent with proposed structure.  
Impurities observed: Ethyl acetate and hexane

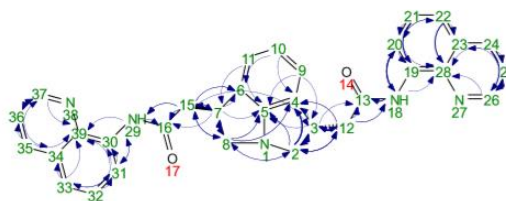

00711788-0273-003.607.ser — NMR System AV600 — HMBGPG\_JE DMSO C:\sharii01 {5 A4 - 504}

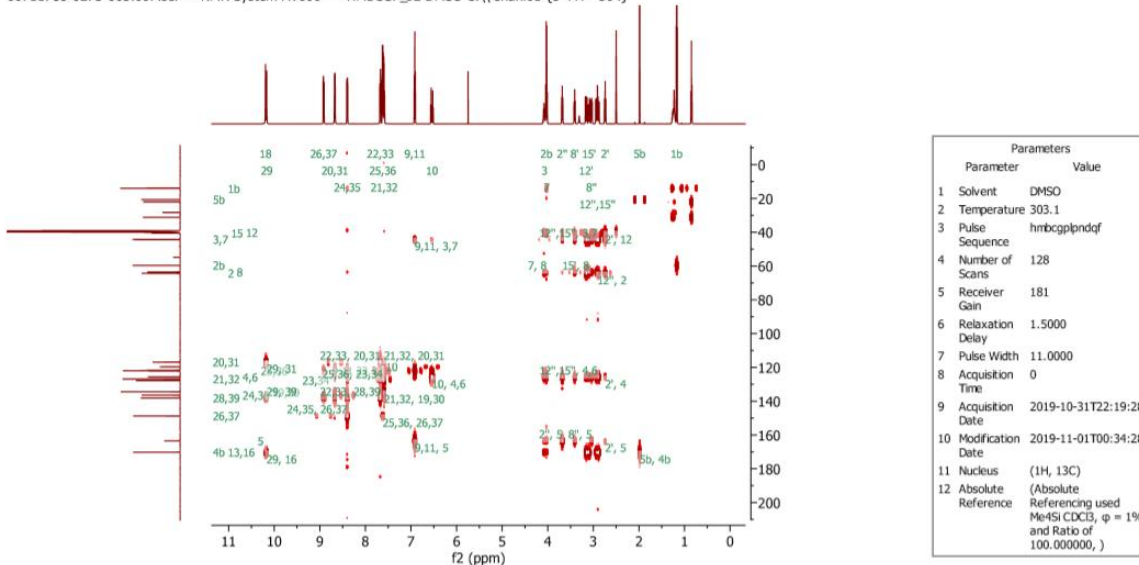

Spectrum is consistent with proposed structure.  
Impurities observed: Ethyl acetate and hexane

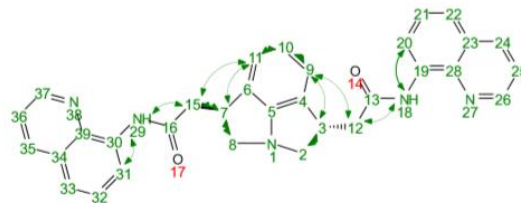

00711788-0273-003.606.ser — NMR System AV600 — NOESYPSHW\_JE DMSO C:\sharii01 {5 A4 - 504}

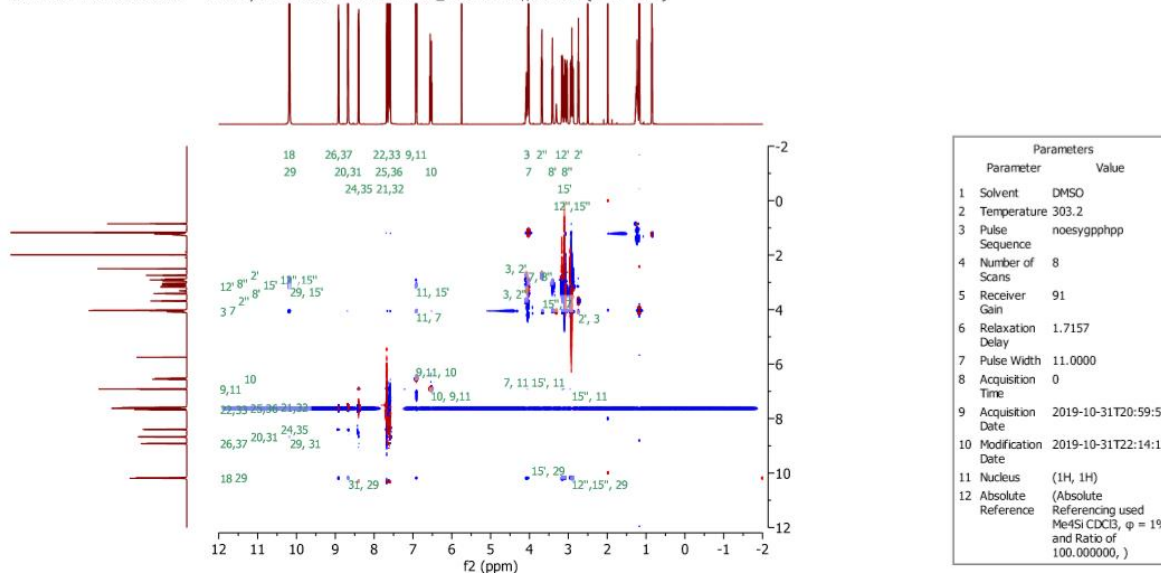

Spectrum is consistent with proposed structure.  
Impurities observed: Ethyl acetate and hexane

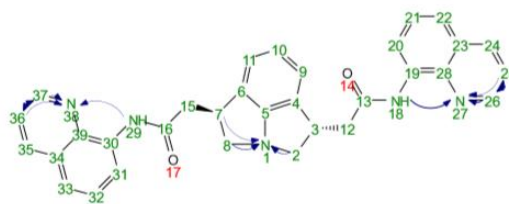

00711788-0273-003.609.ser — NMR System AV600 — HMBC15N\_JE DMSO C:\sharii01 {5 A4 - 504}

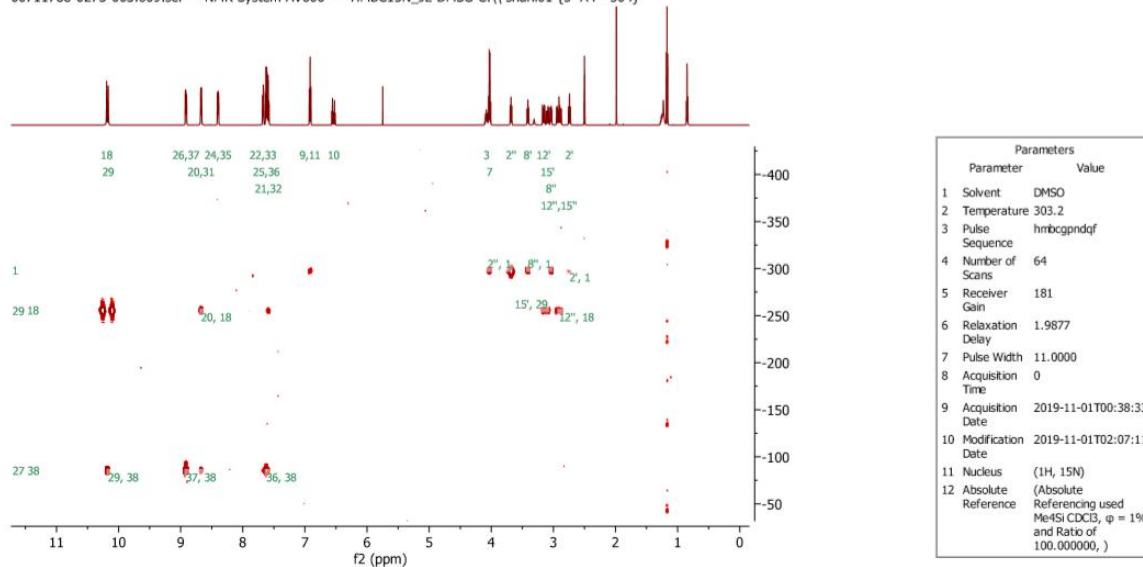

712344-0548-001.301.fid  
NMR System Tang  
PROTON CDCl3 C:\\ yangs104 3

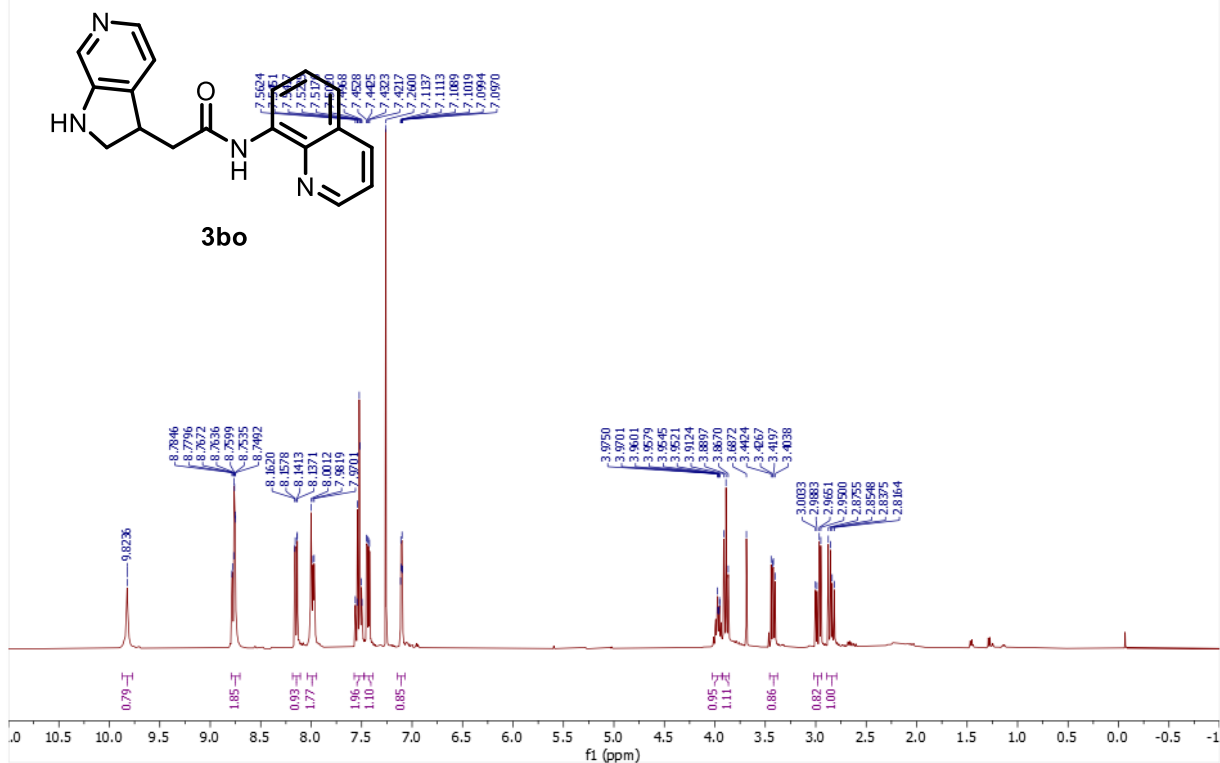

712344-0548-001.307.fid  
NMR System Tang  
C13CPD CDCl3 C:\\ yangs104 3

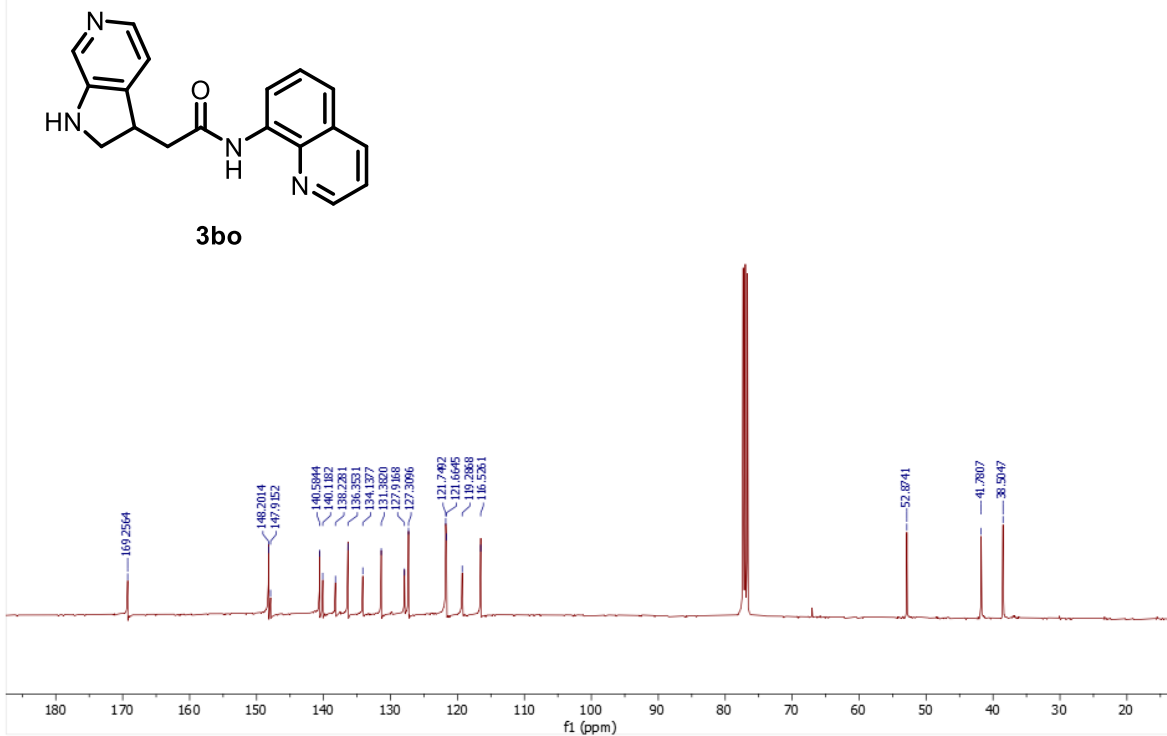



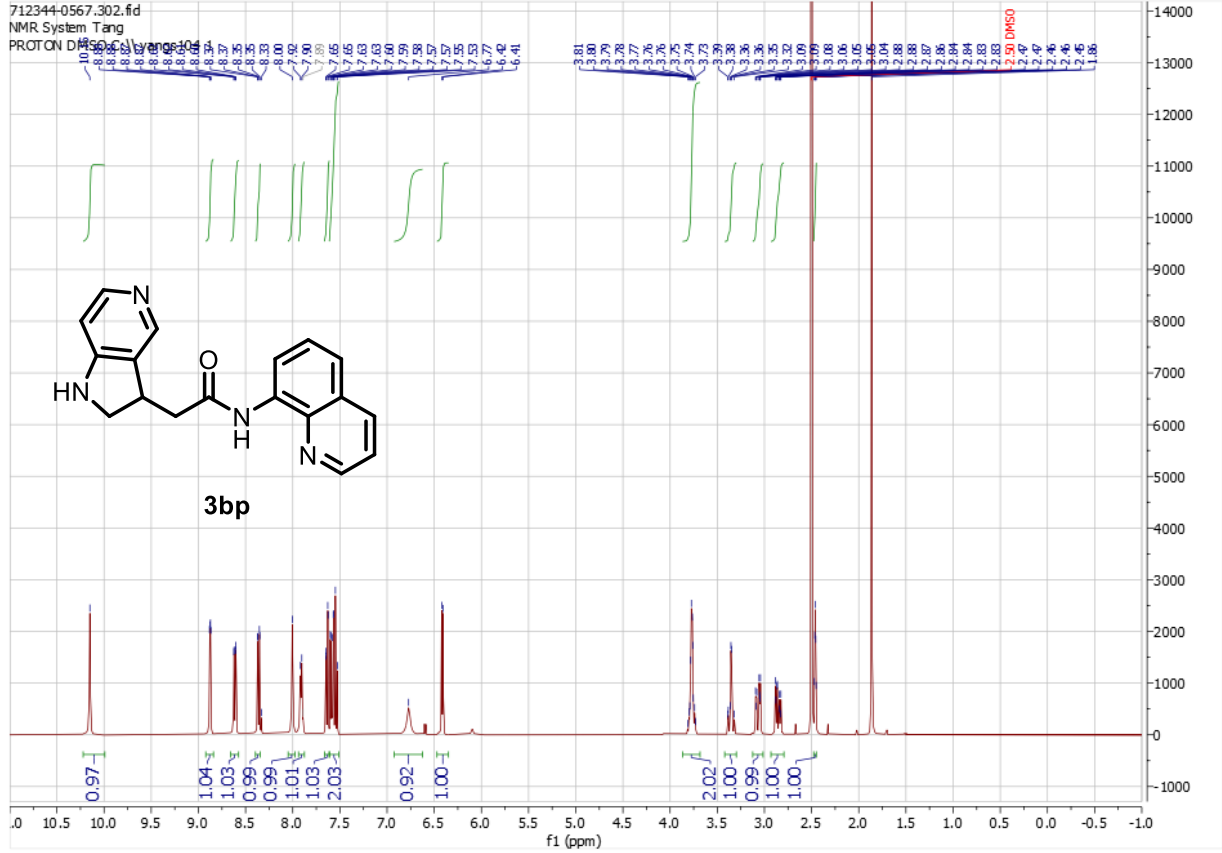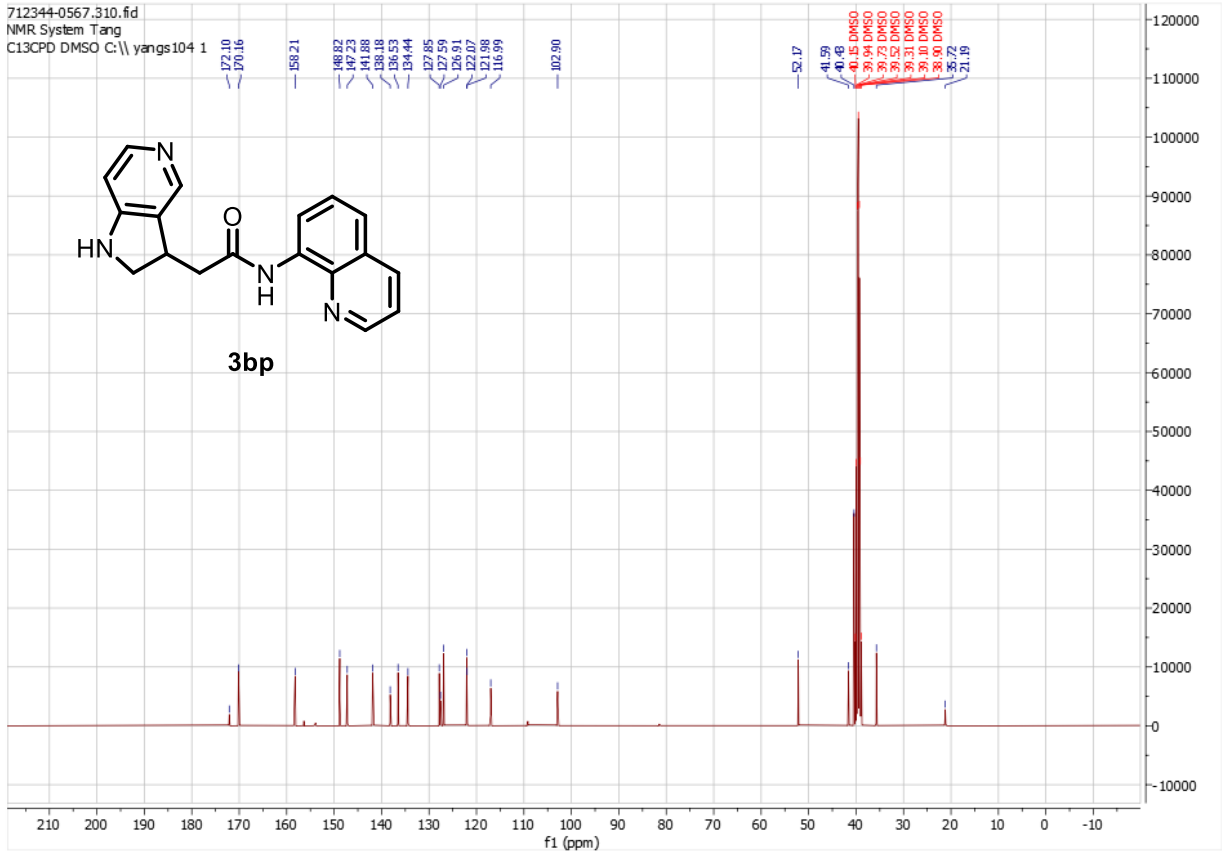

712344-0582-002.30 1.fid  
NMR System Tang  
PROTON DMSO C:\yangs104 1

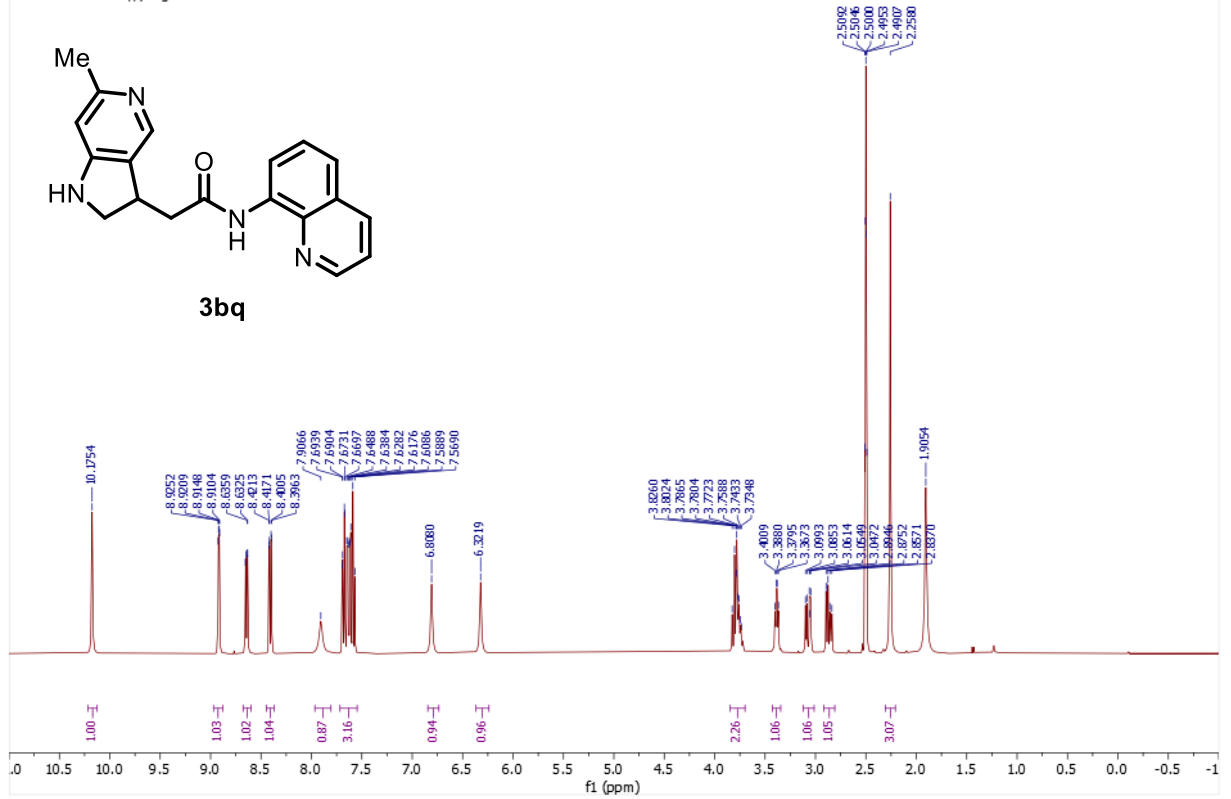

712344-0582-001.30 3.fid  
NMR System Tang  
C13CPD DMSO C:\yangs104 22

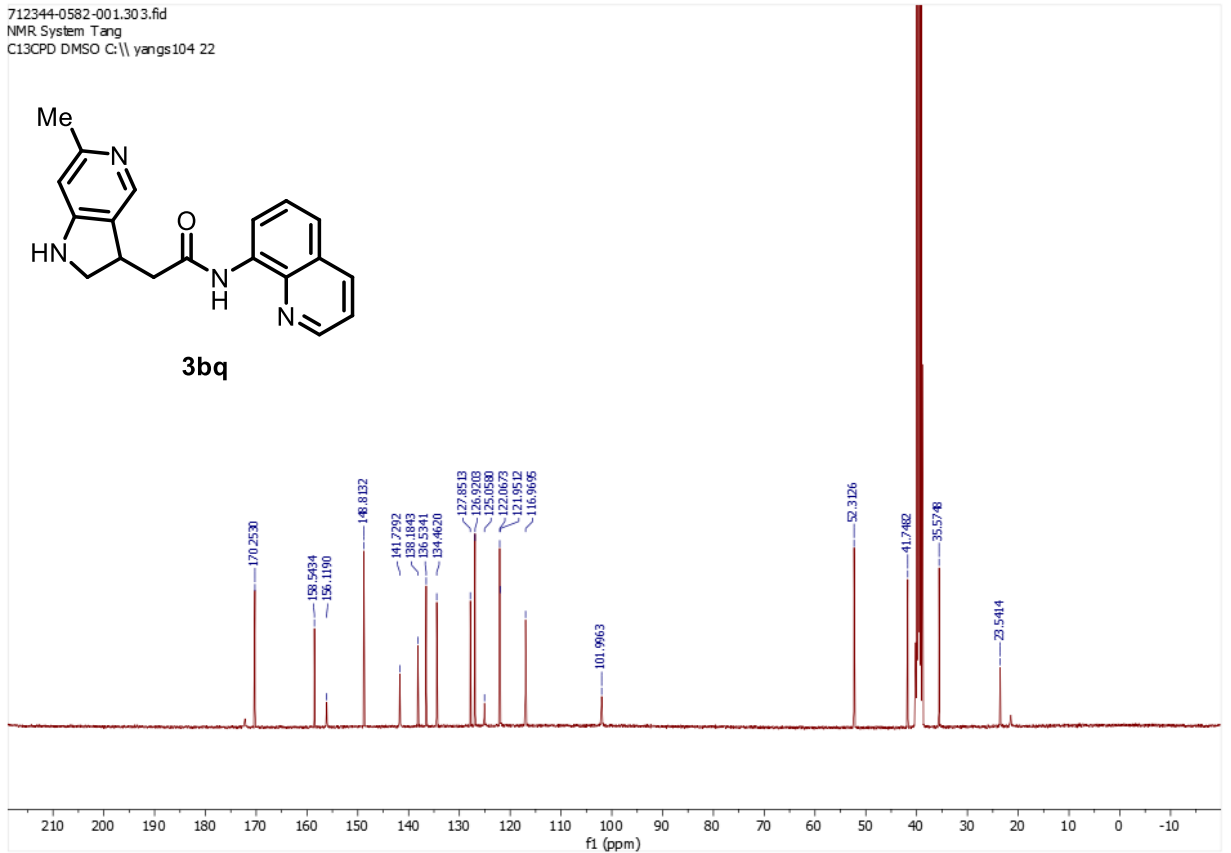

712344-0596-001.301.fid  
NMR System Tang  
PROTON DMSO C:\yangs104 23

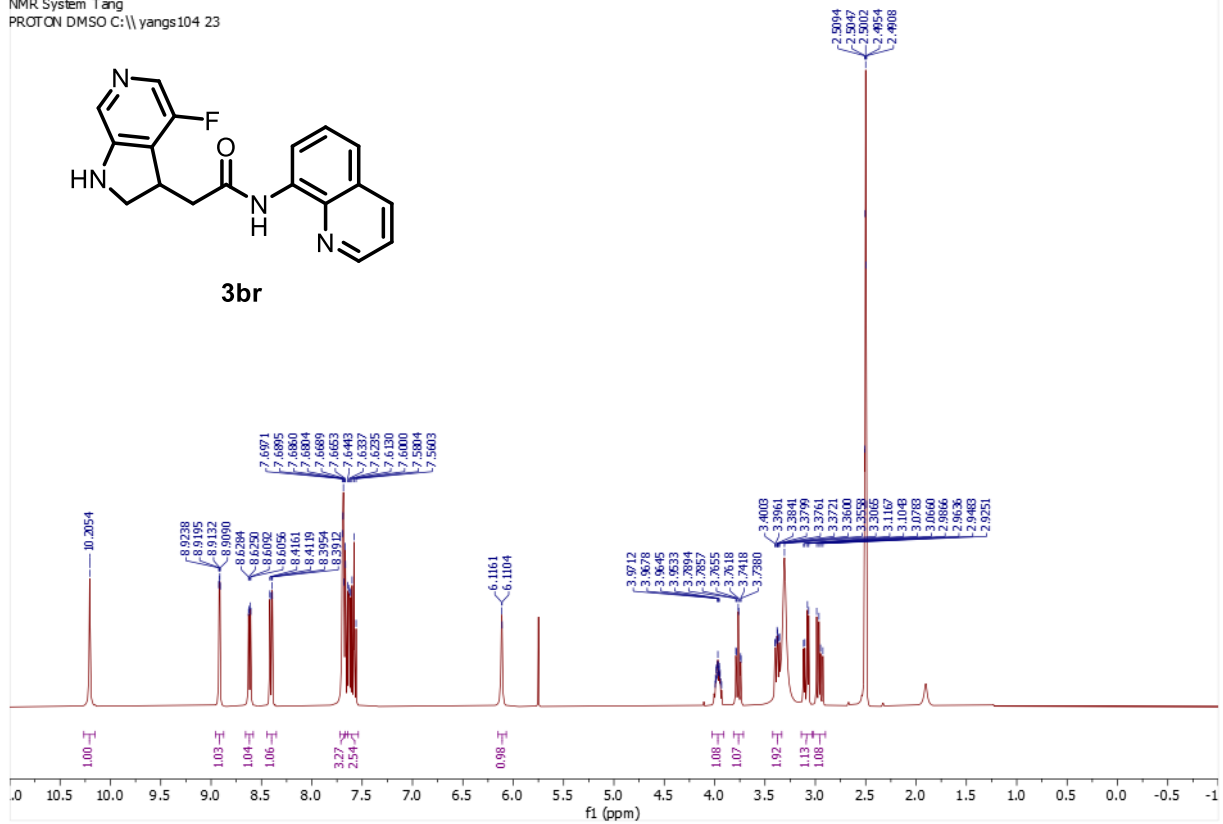

712344-0596-001.302.fid  
NMR System Tang  
C13CPD DMSO C:\yangs104 23

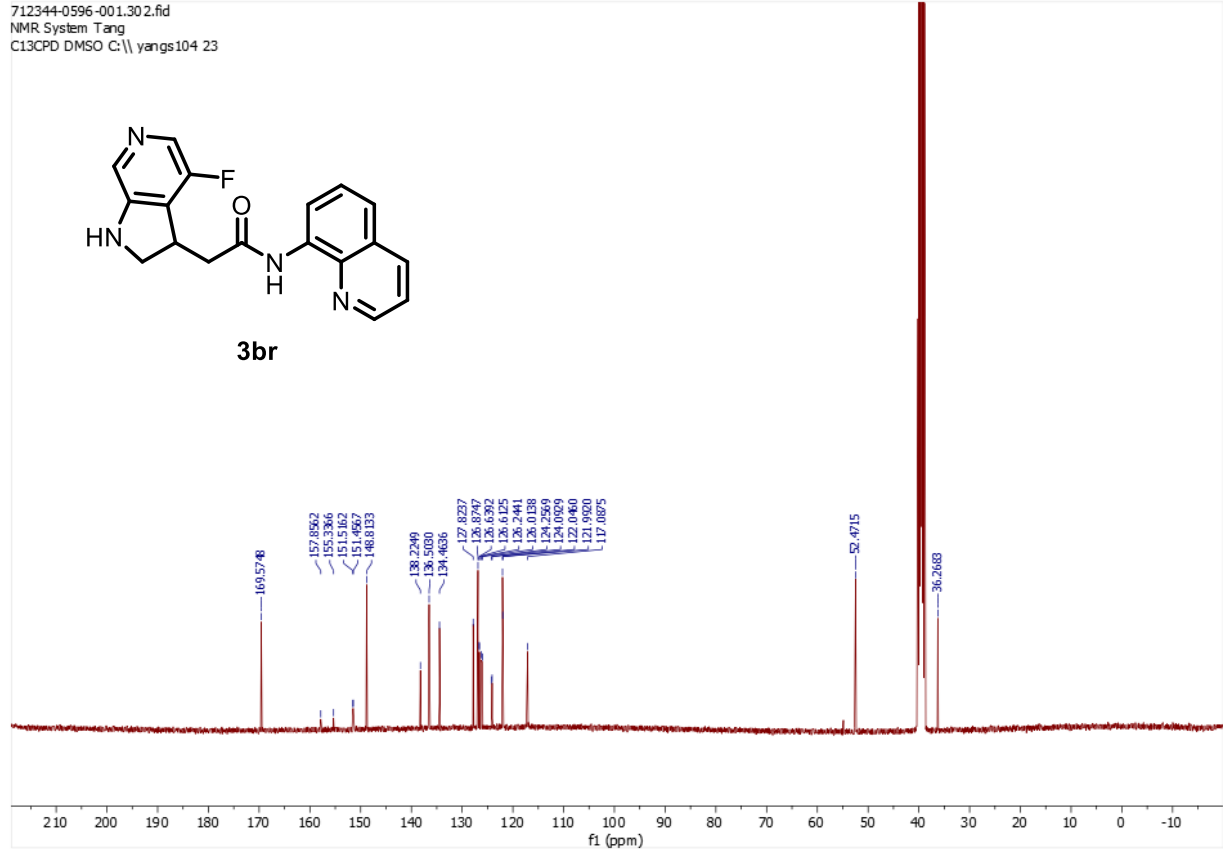

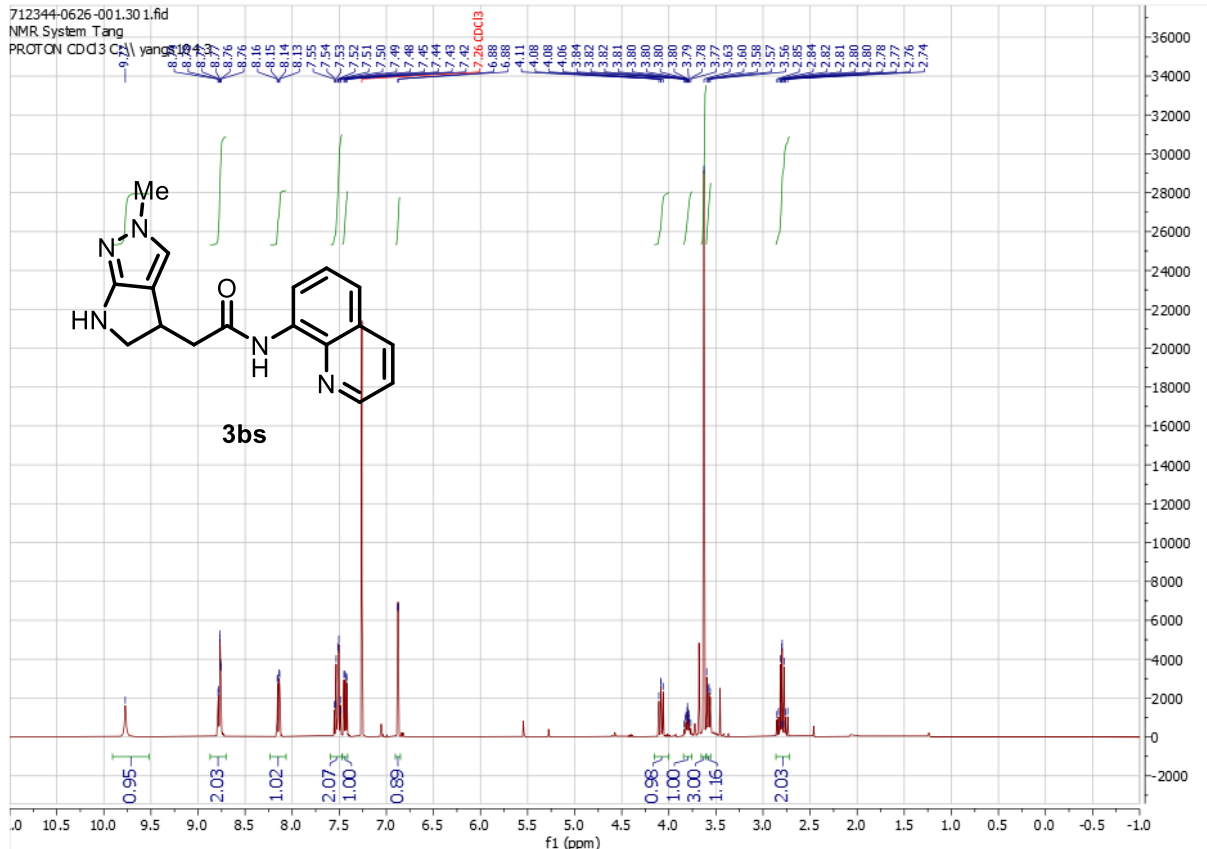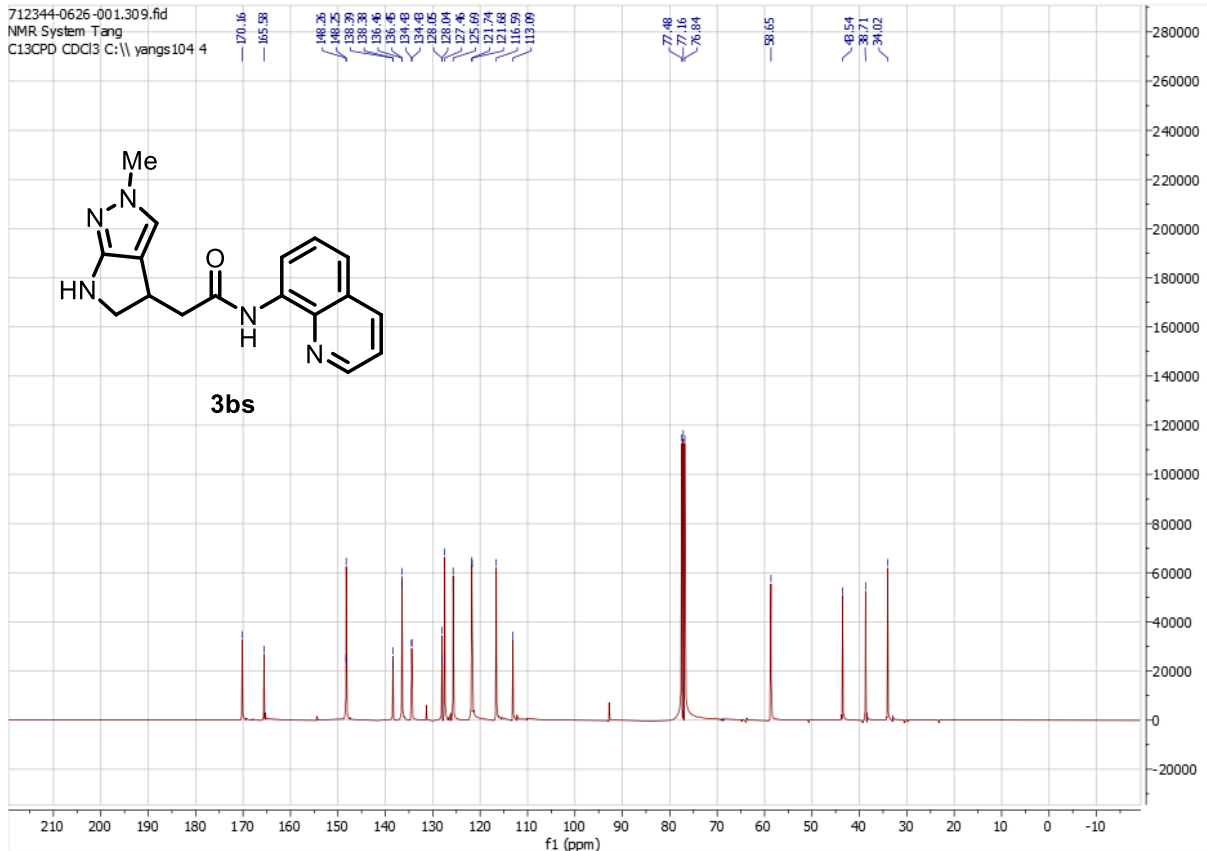

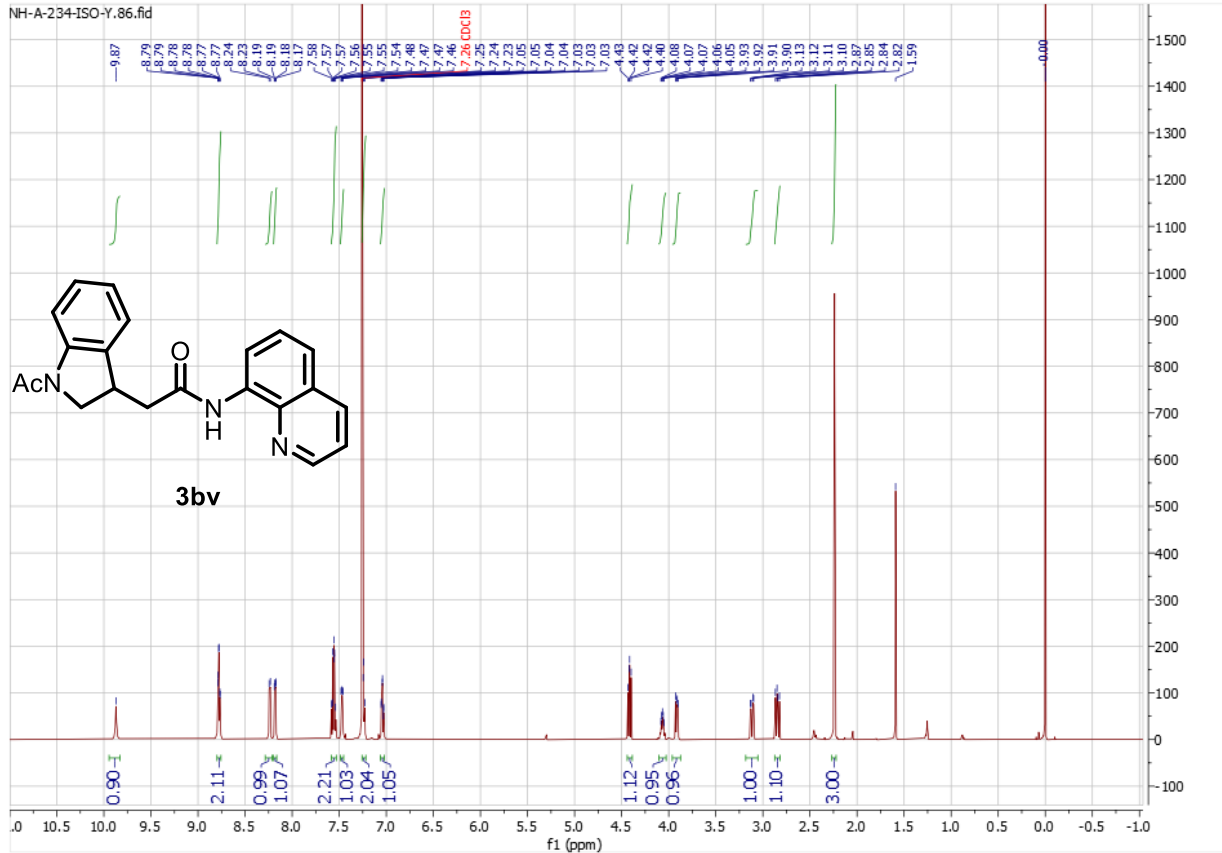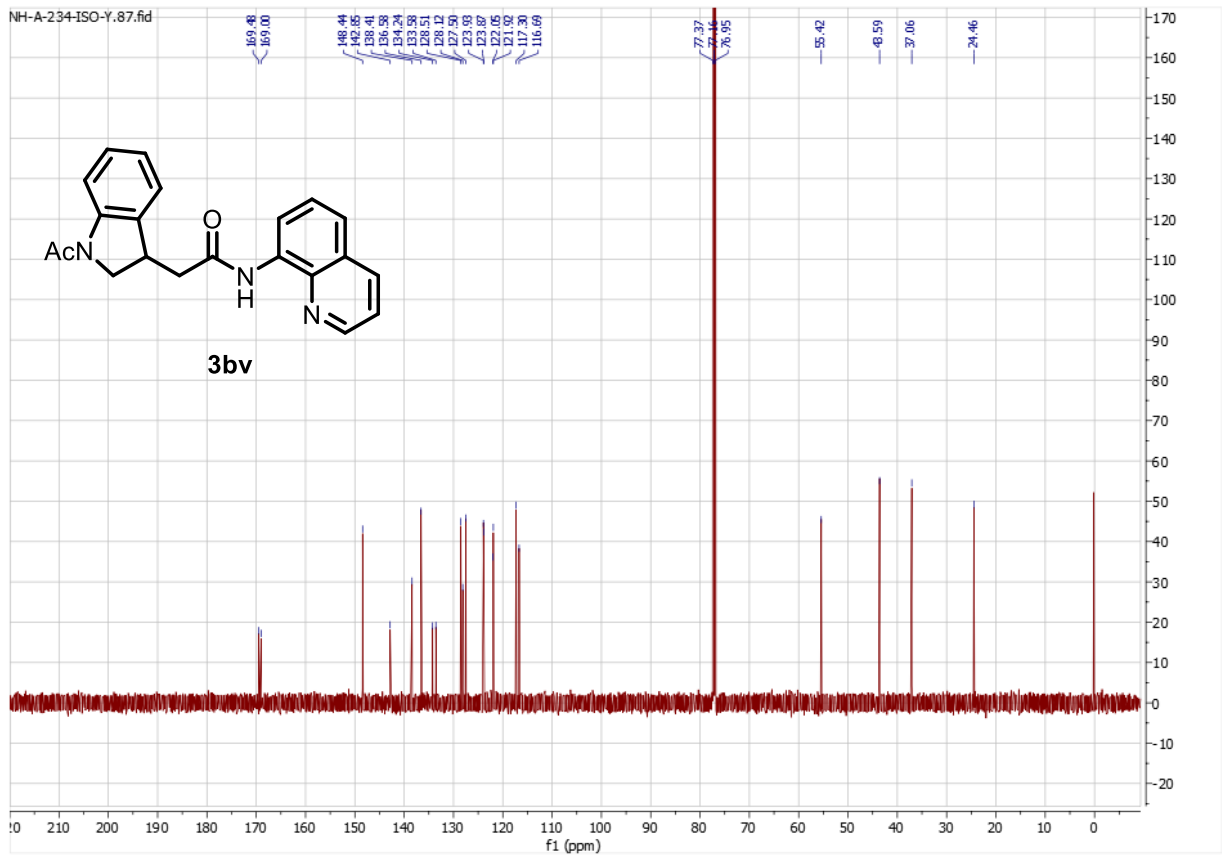

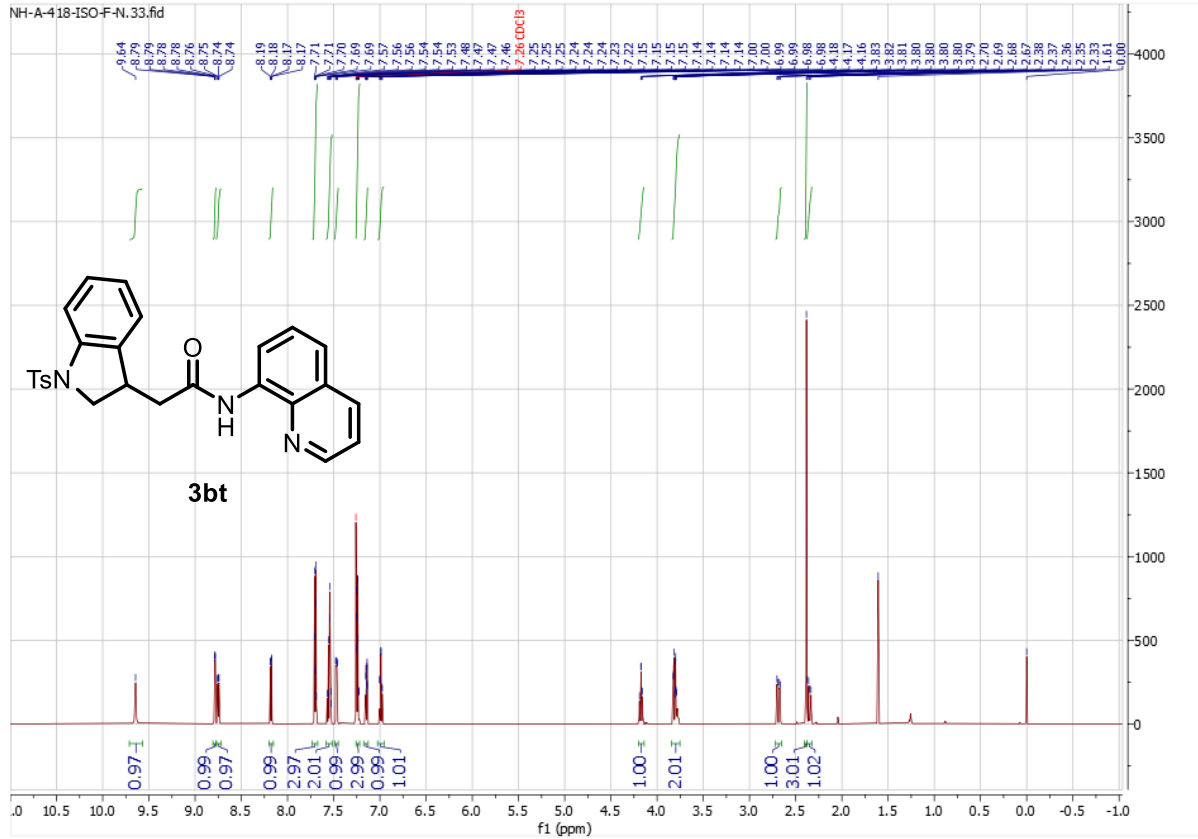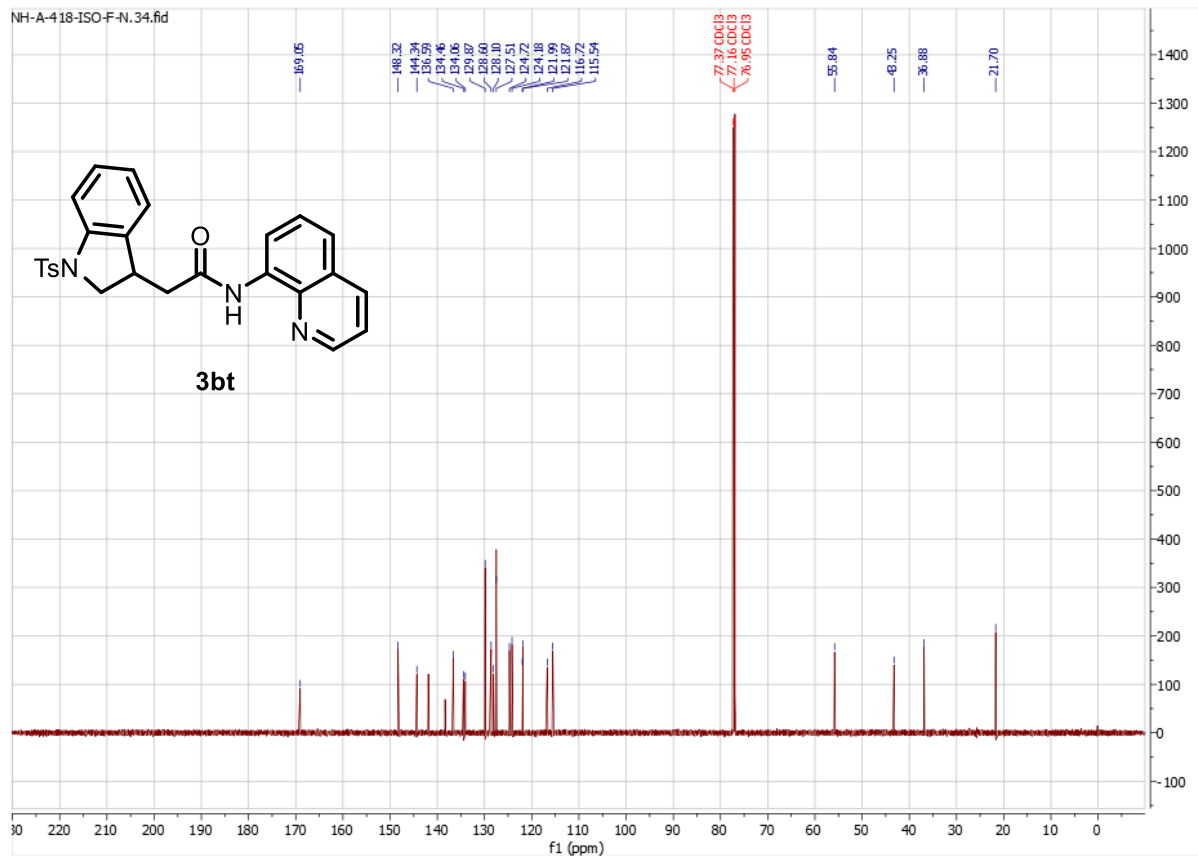

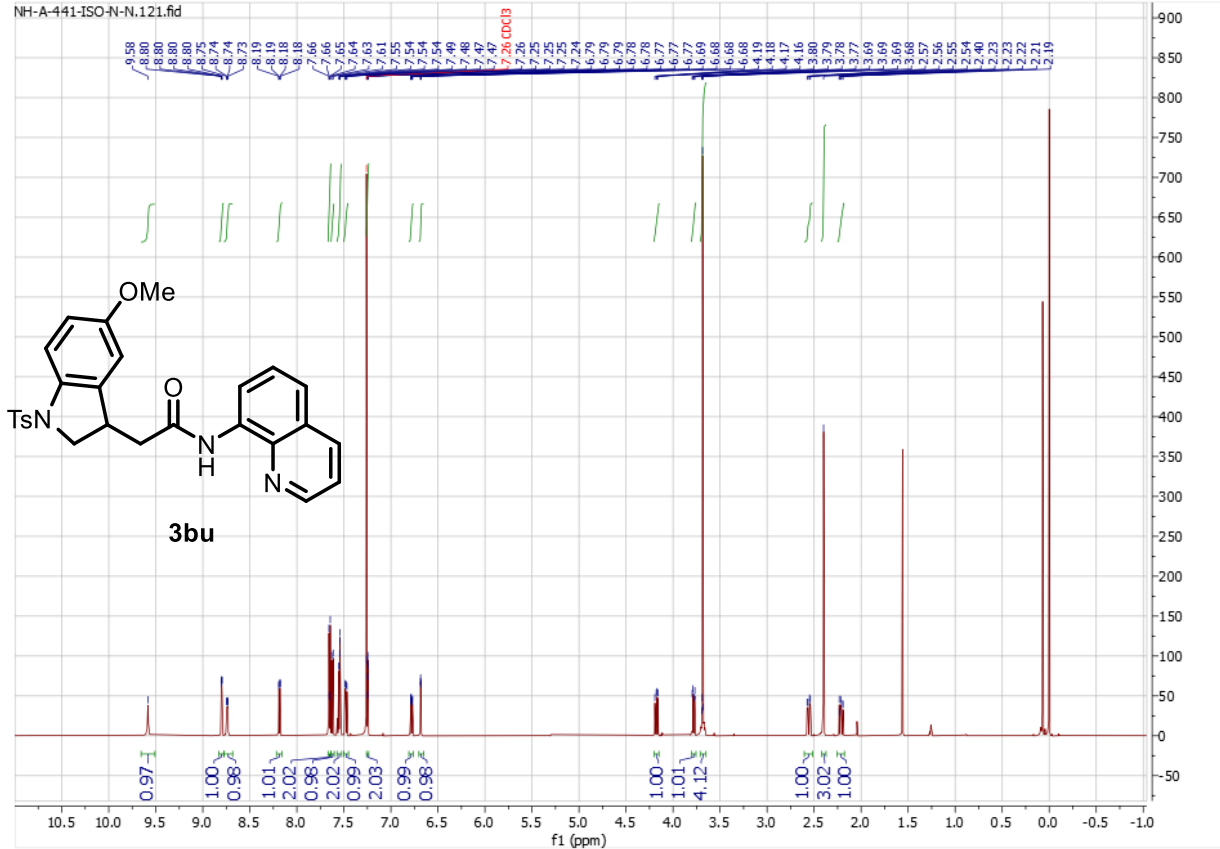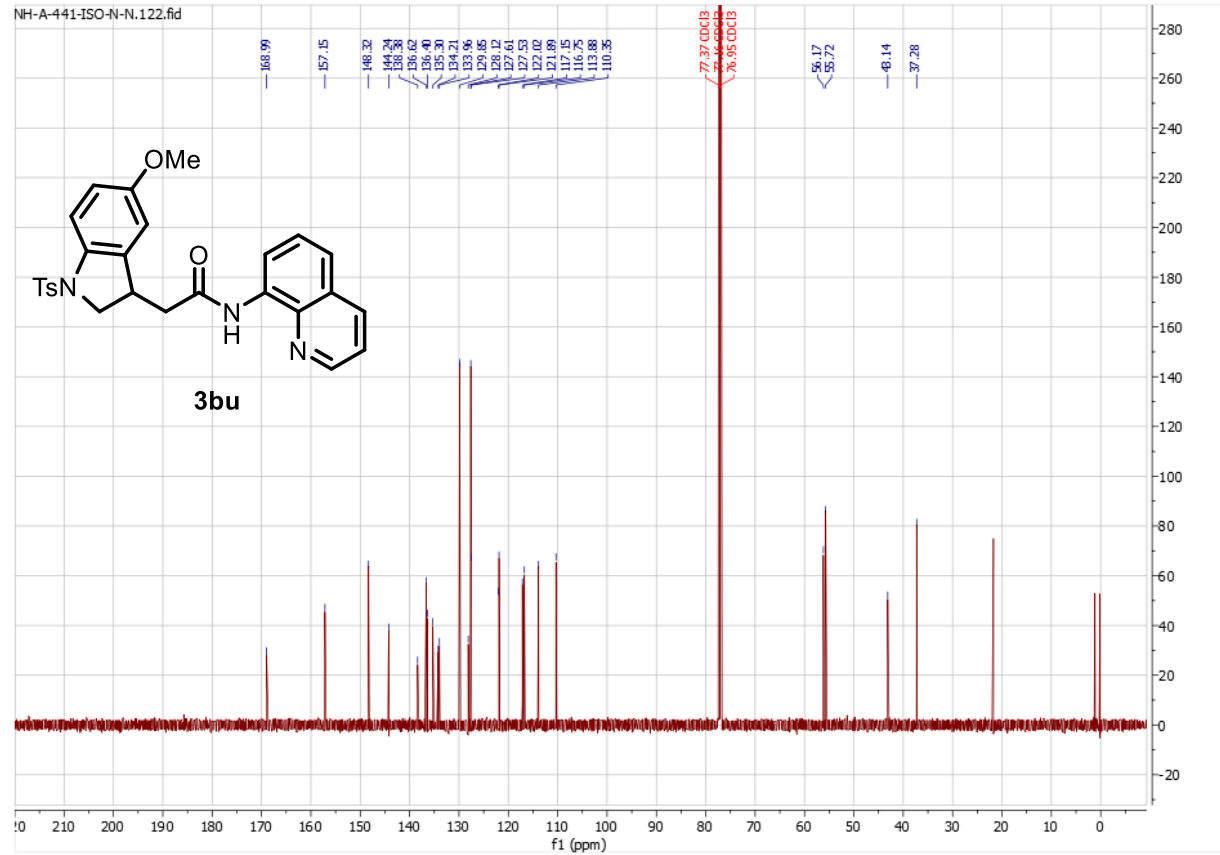

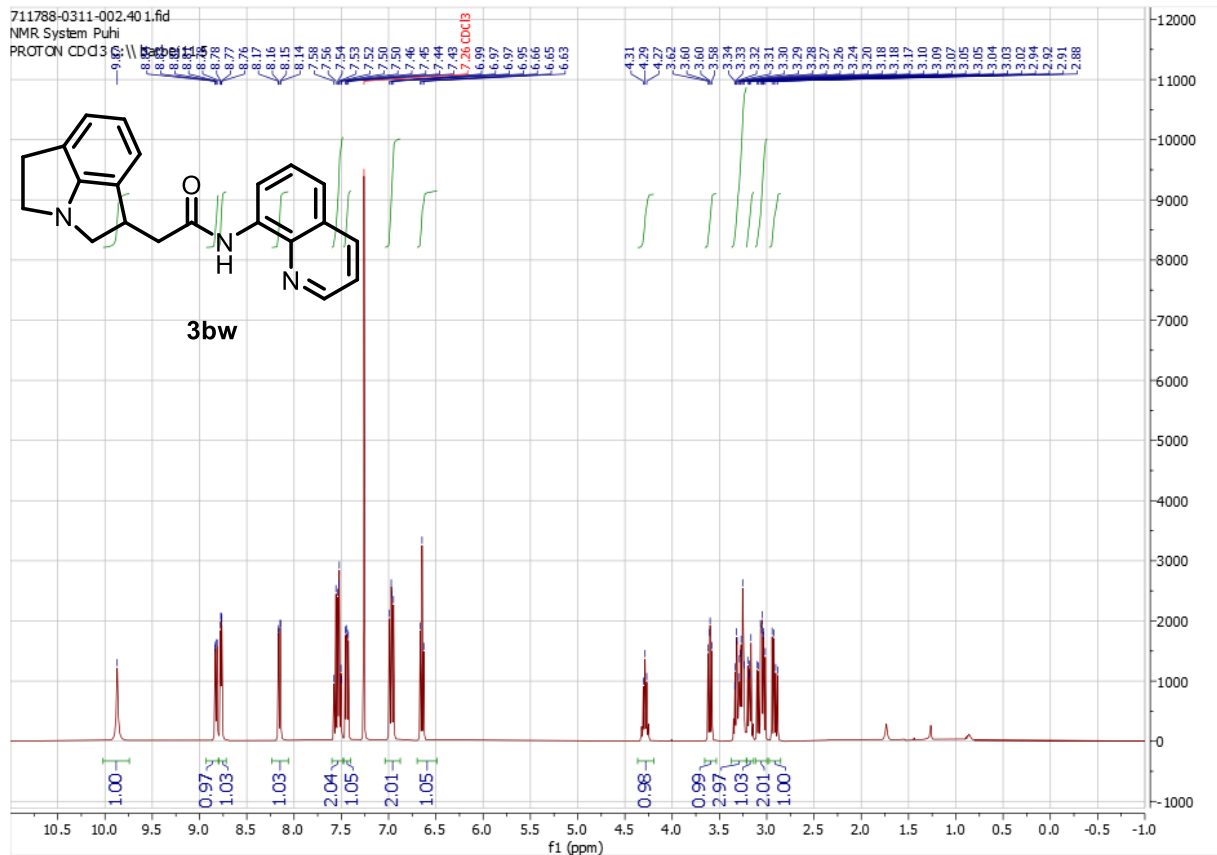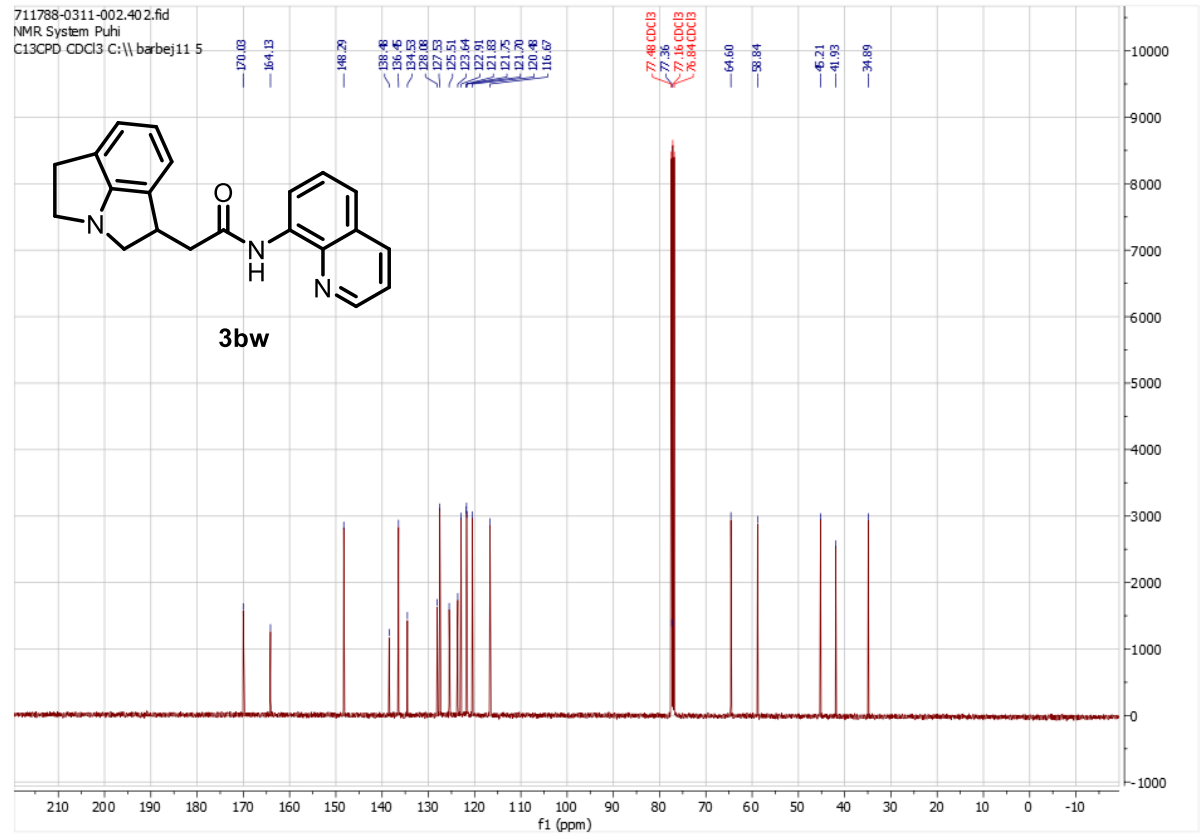



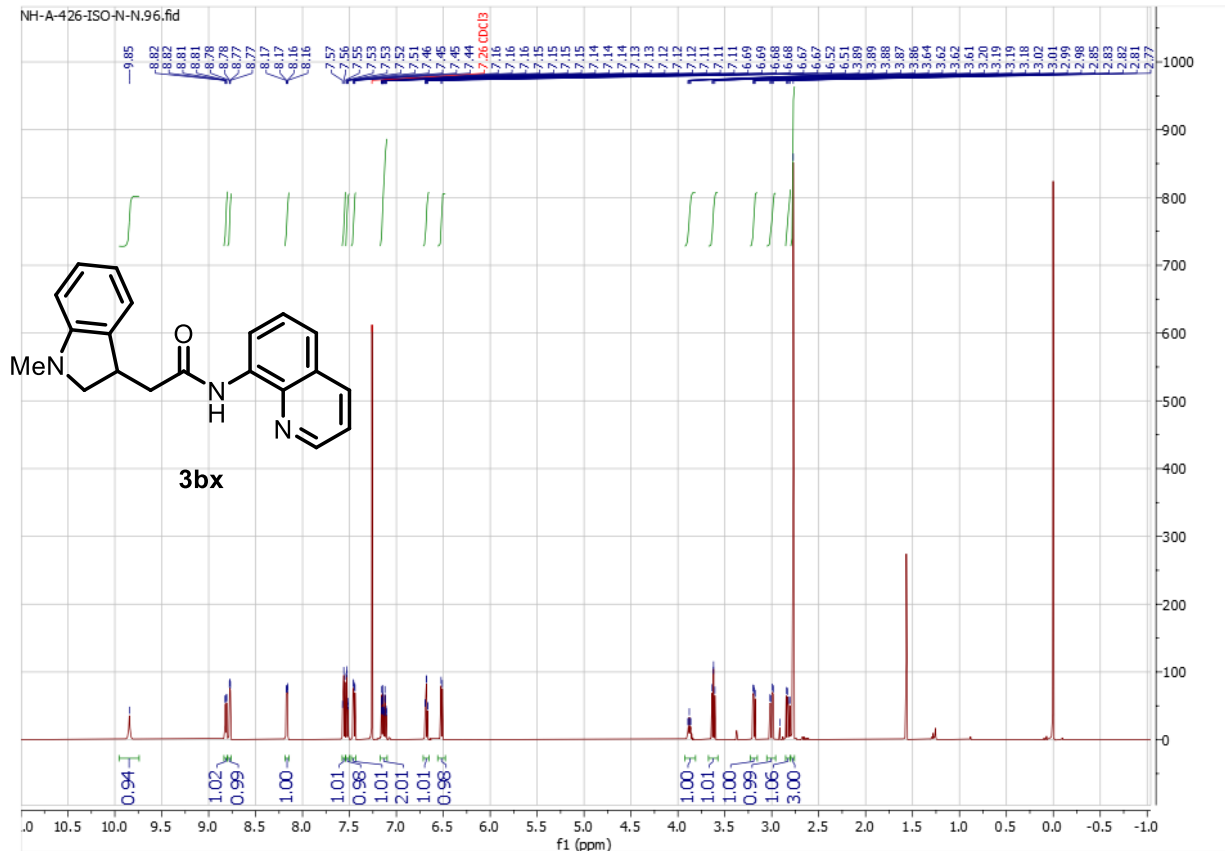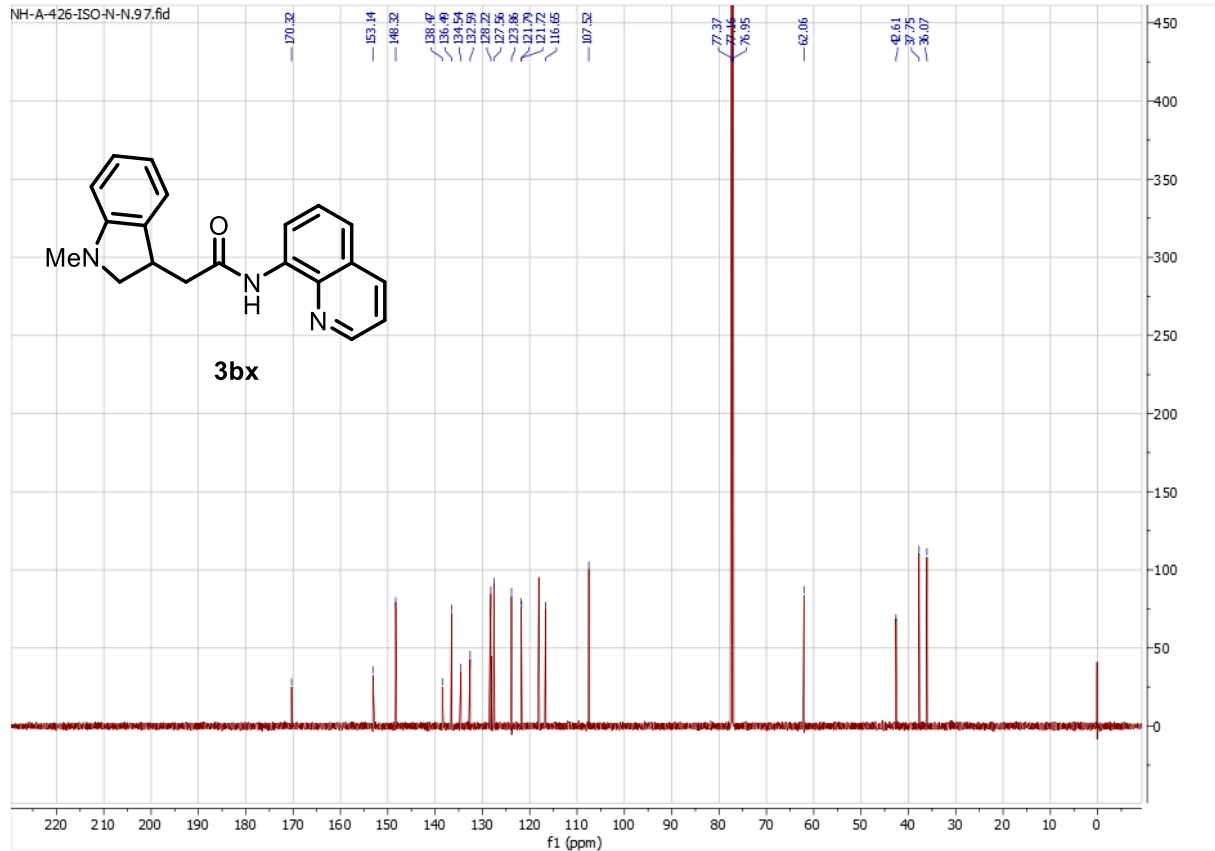

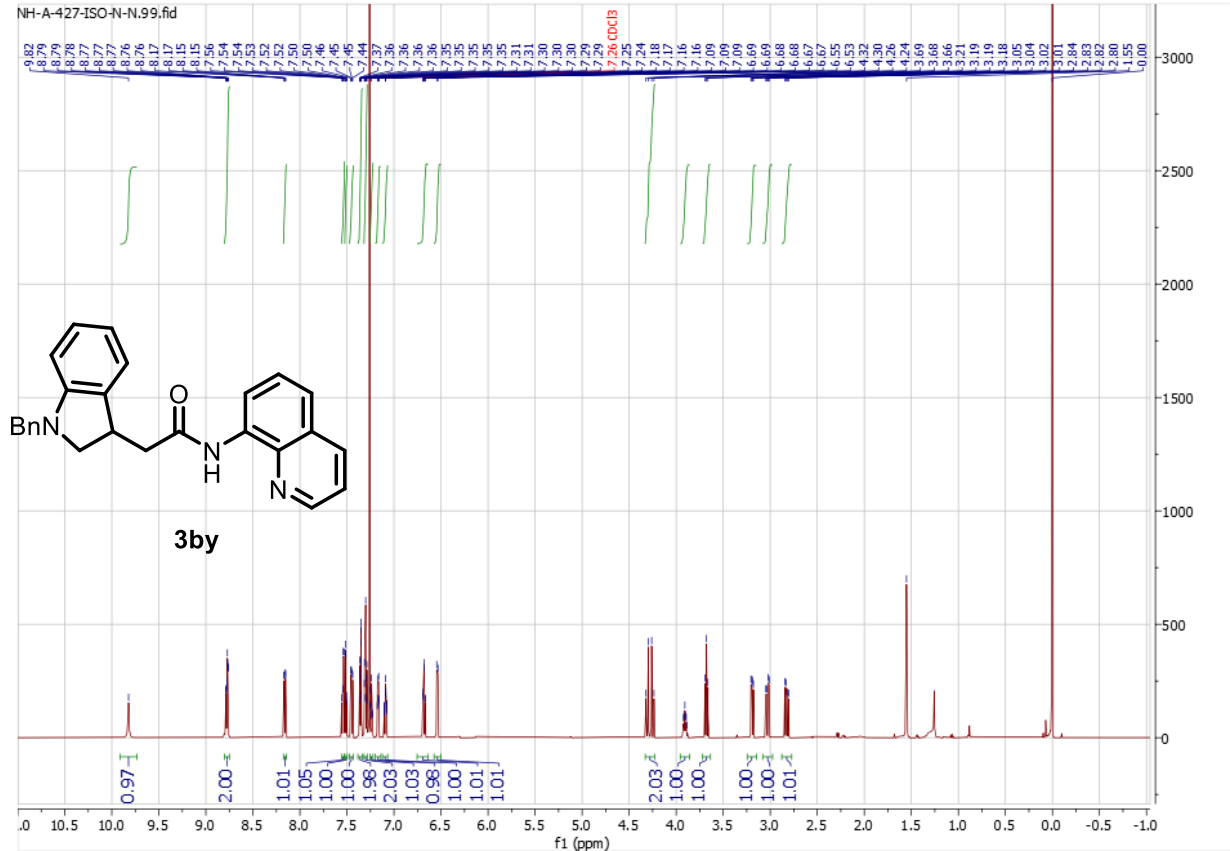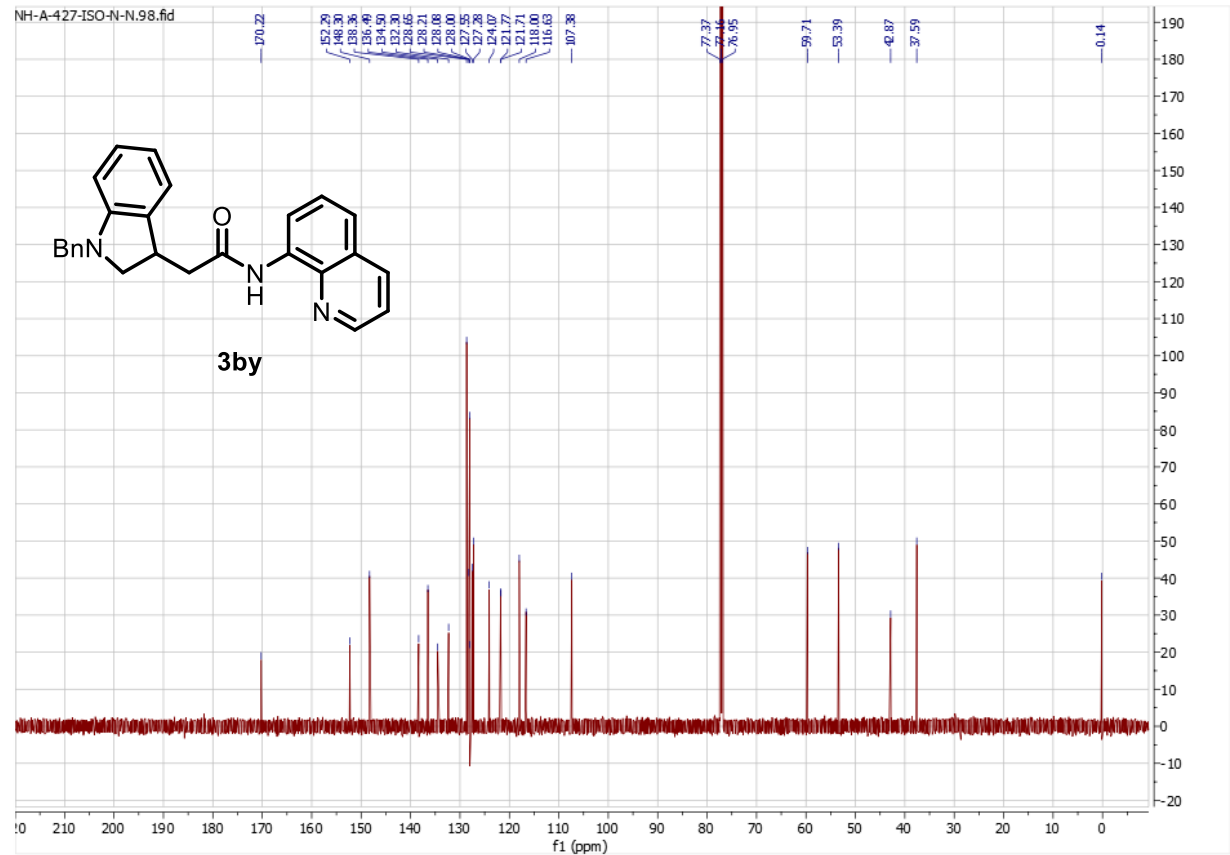

NH-A-094-ISO-2.51.fid

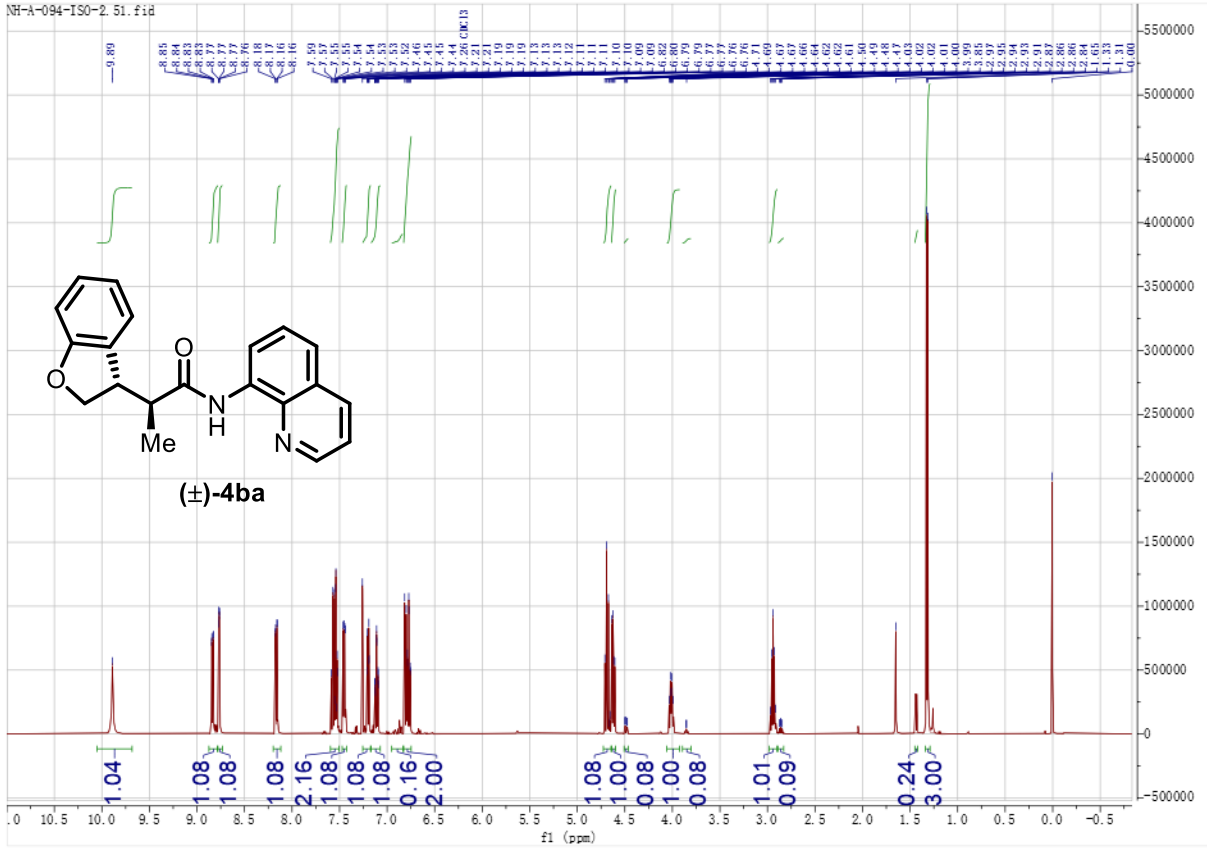

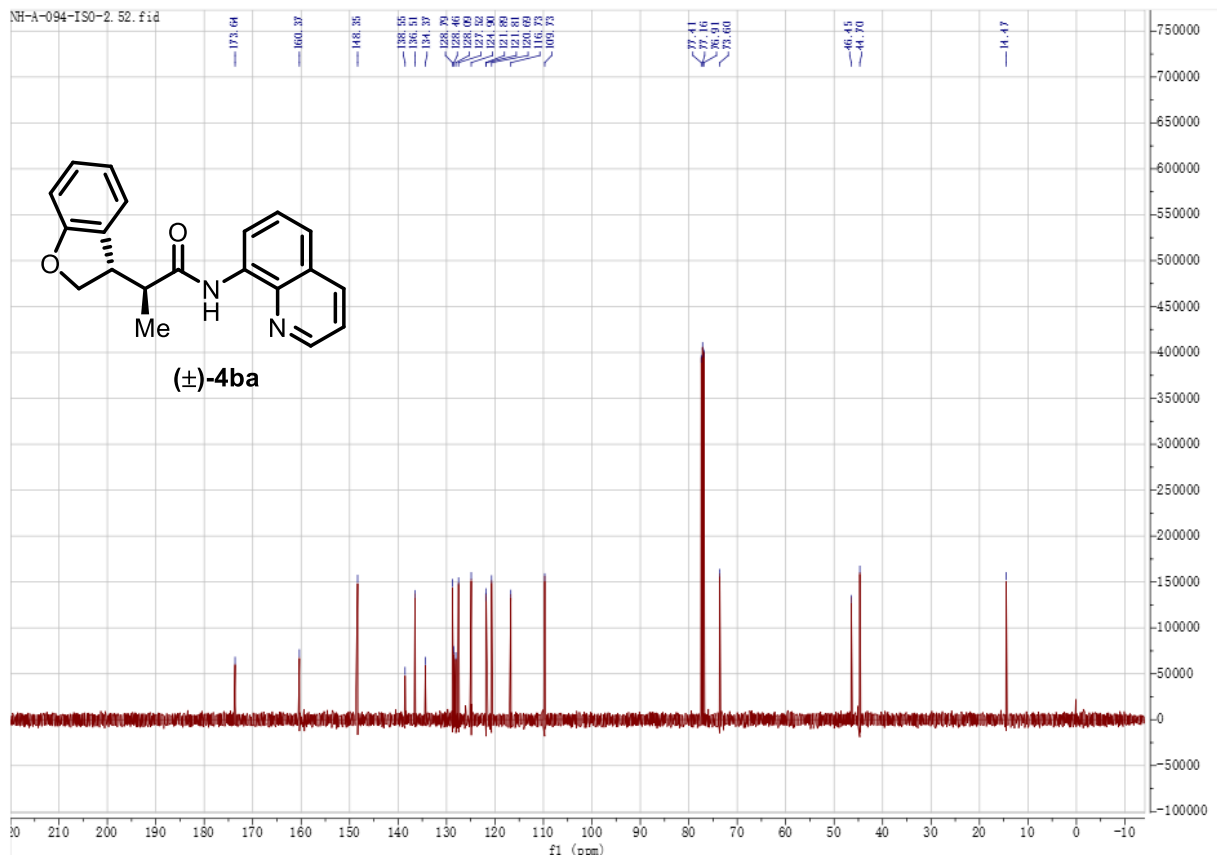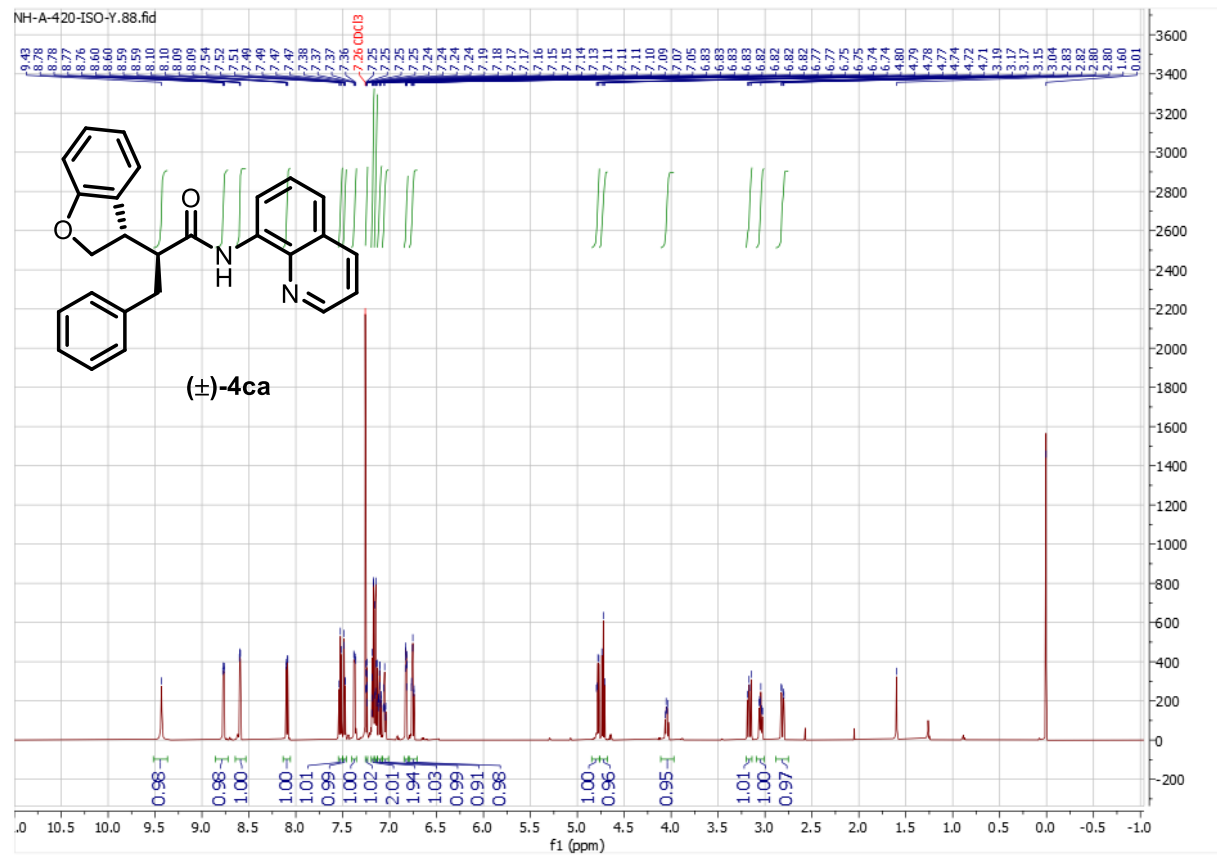

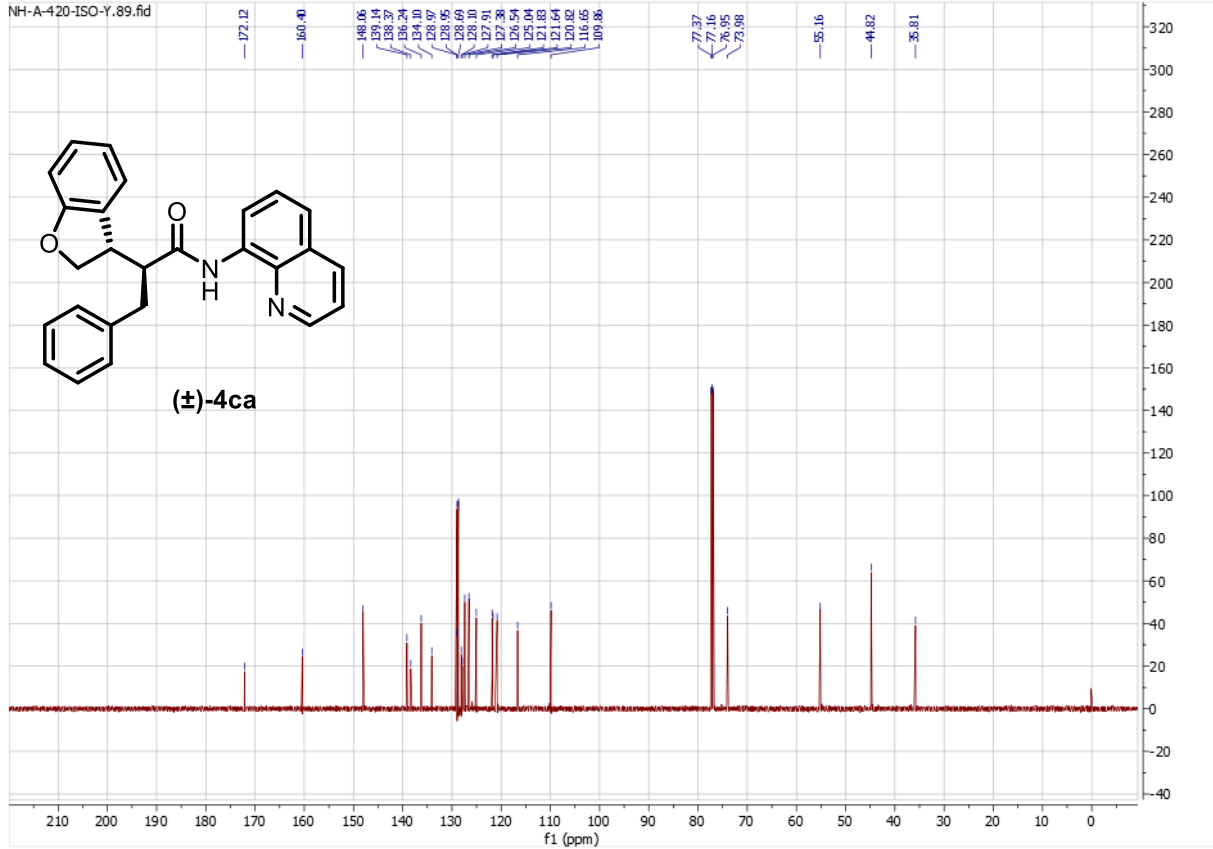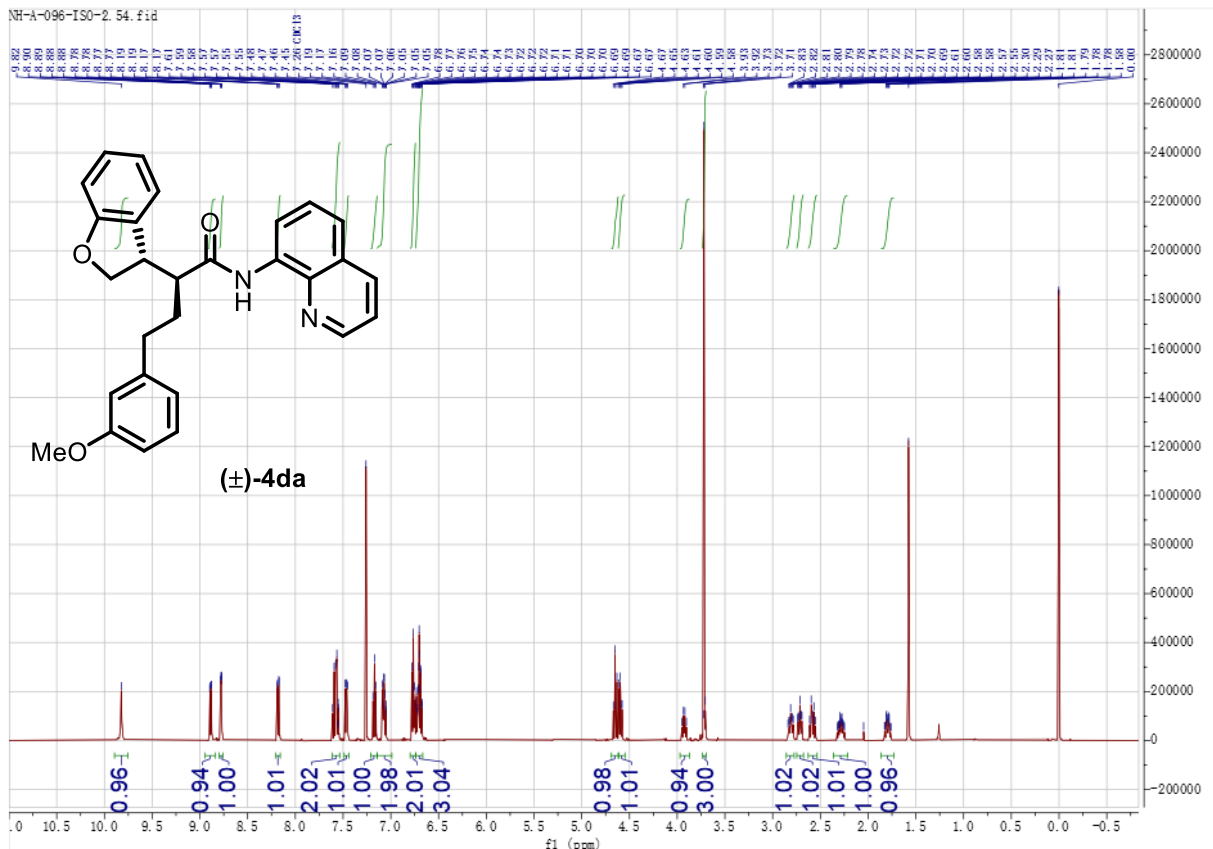

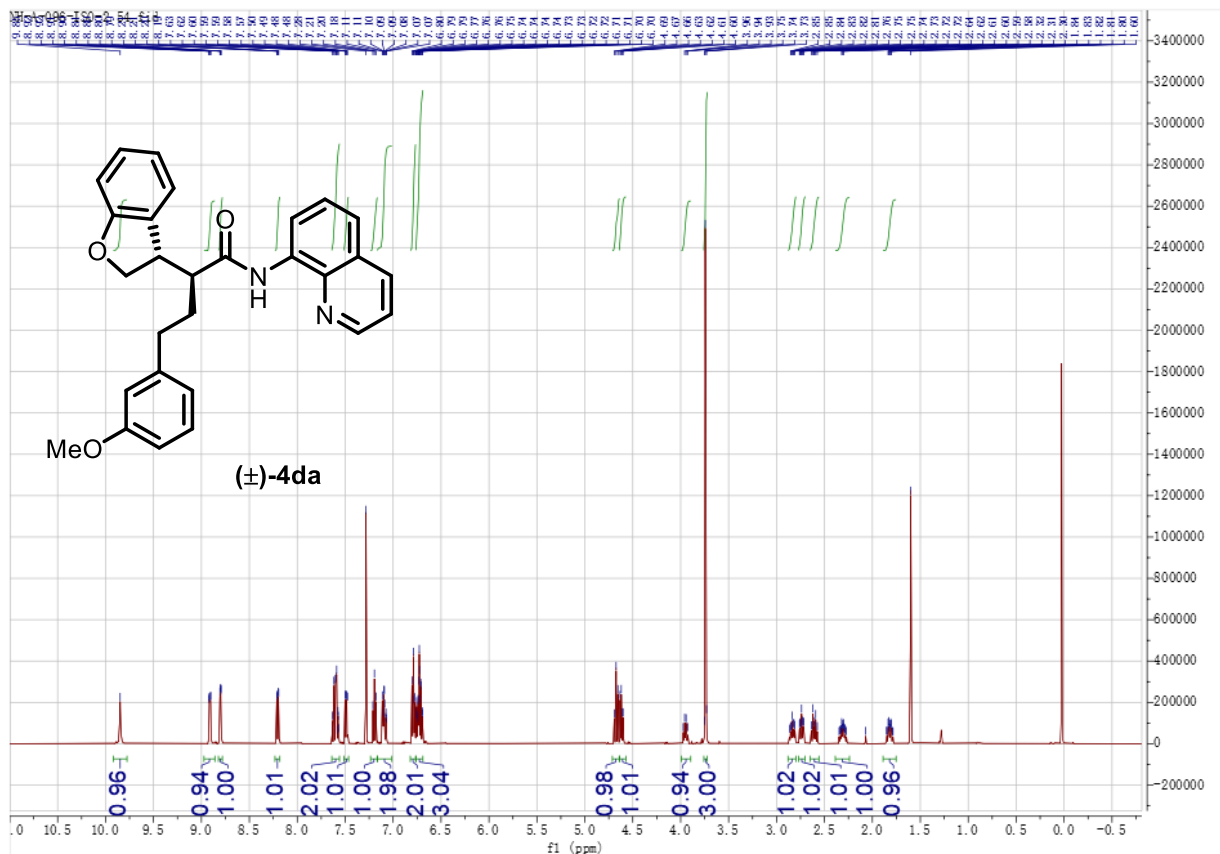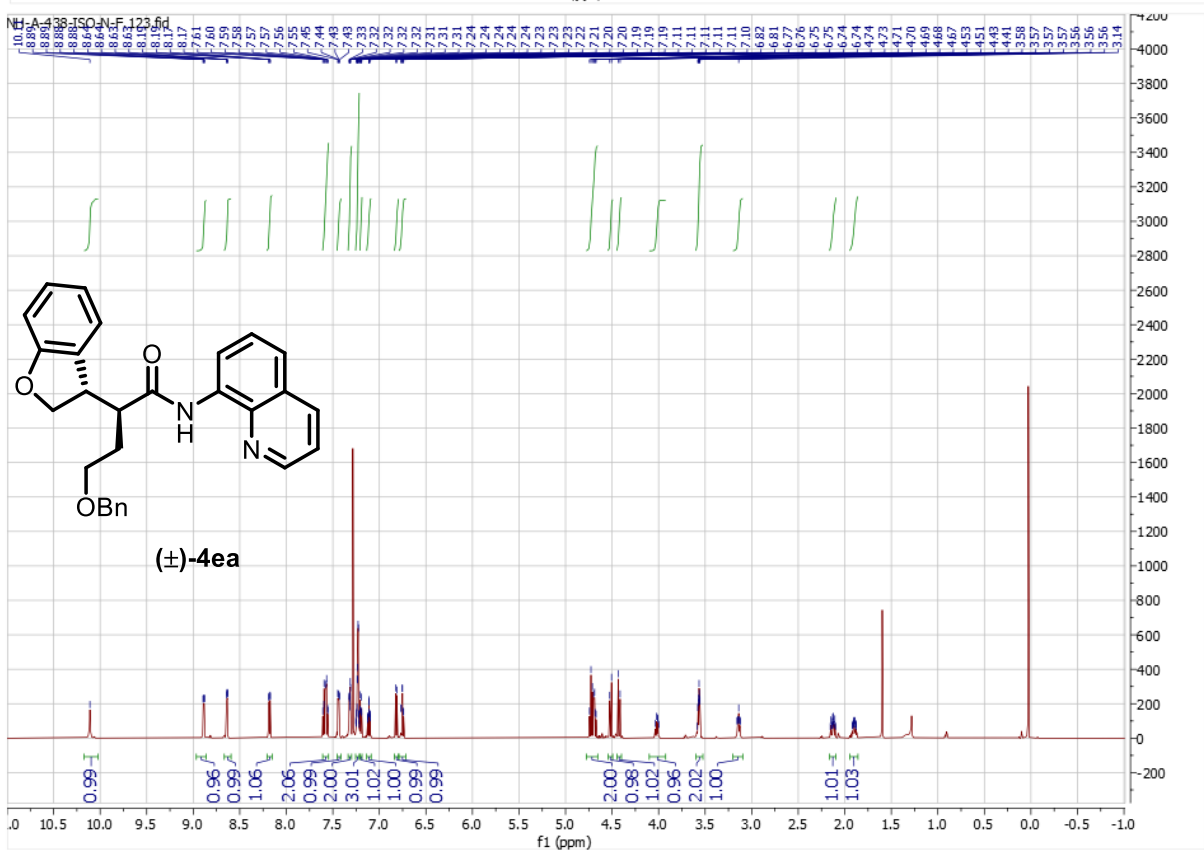

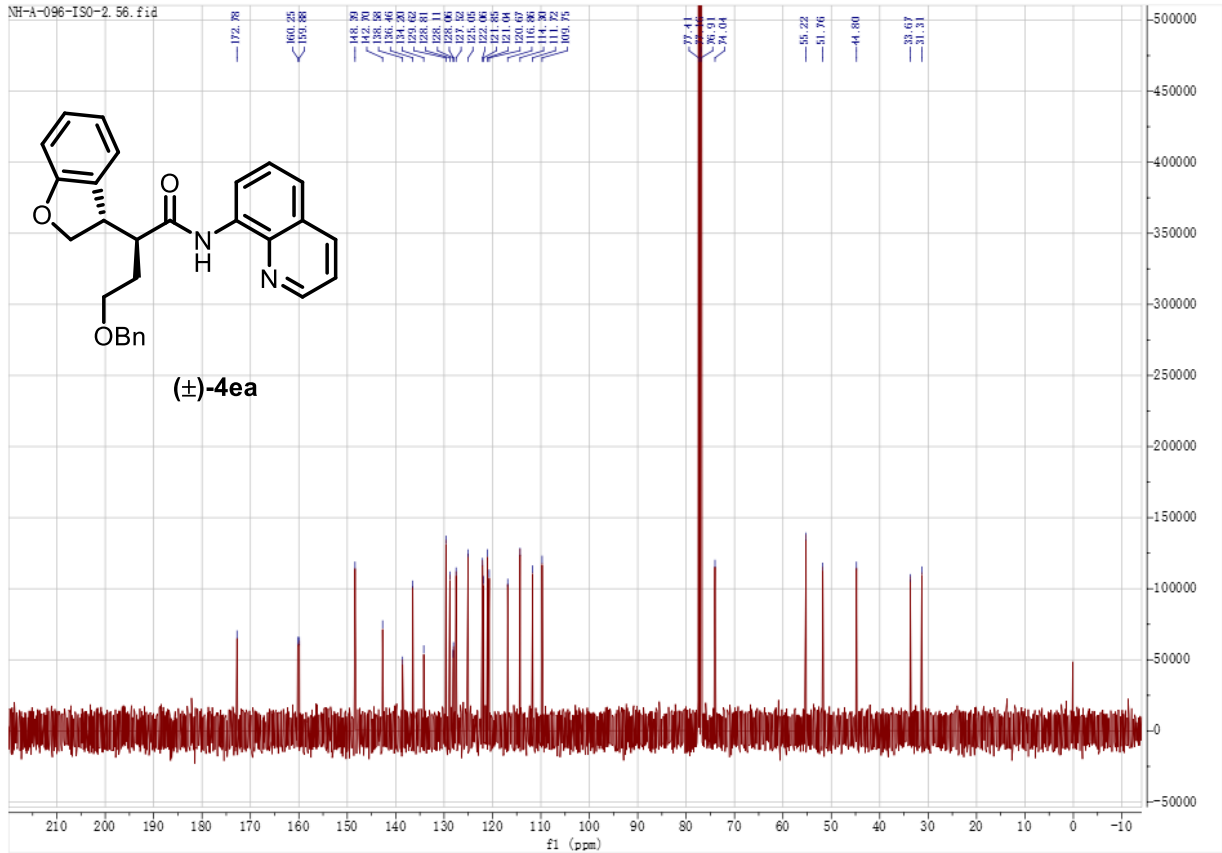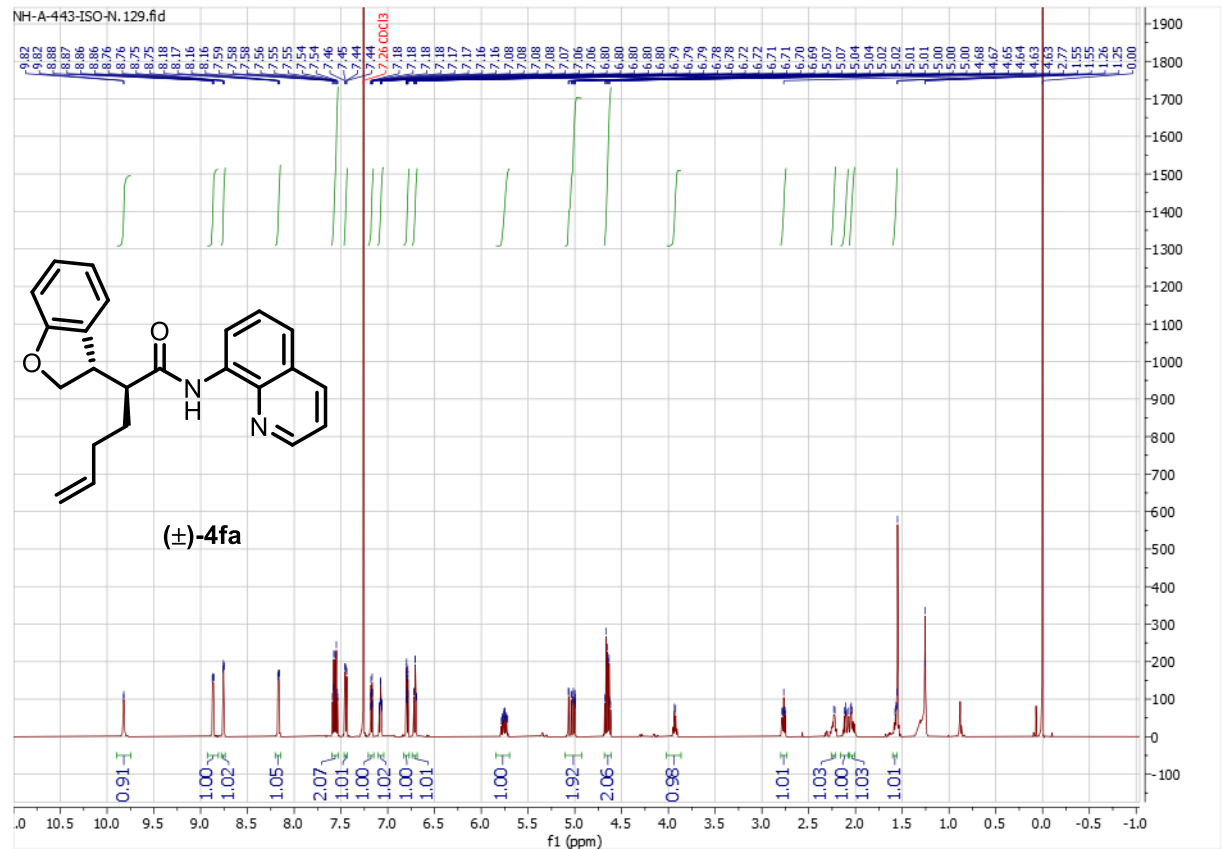

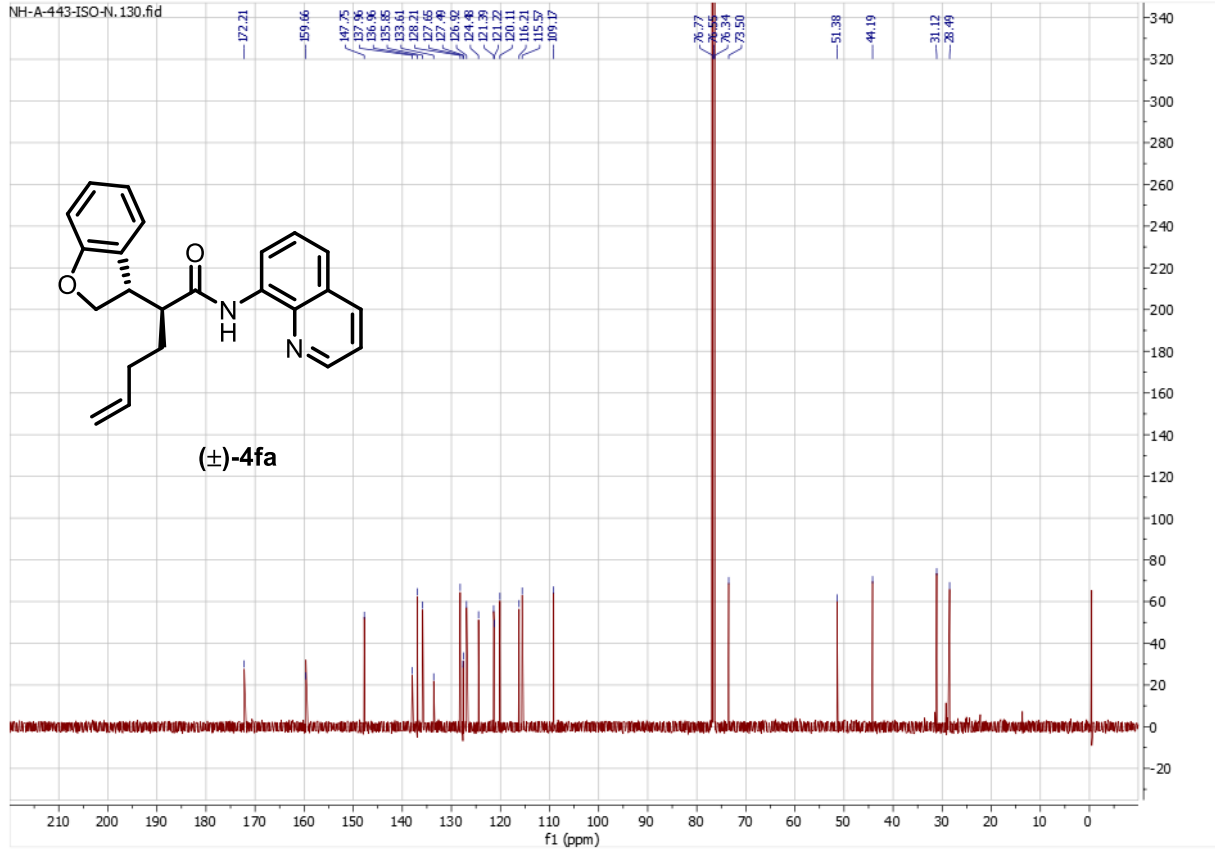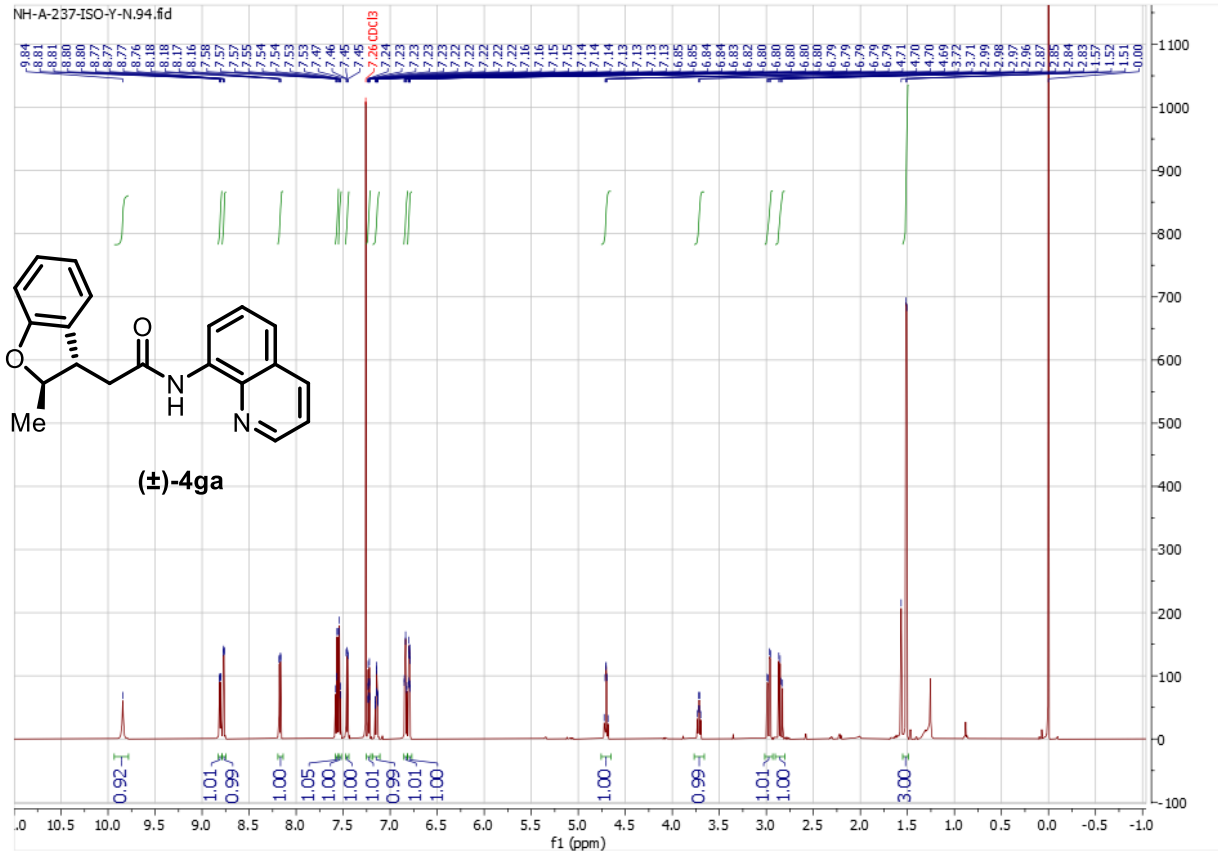



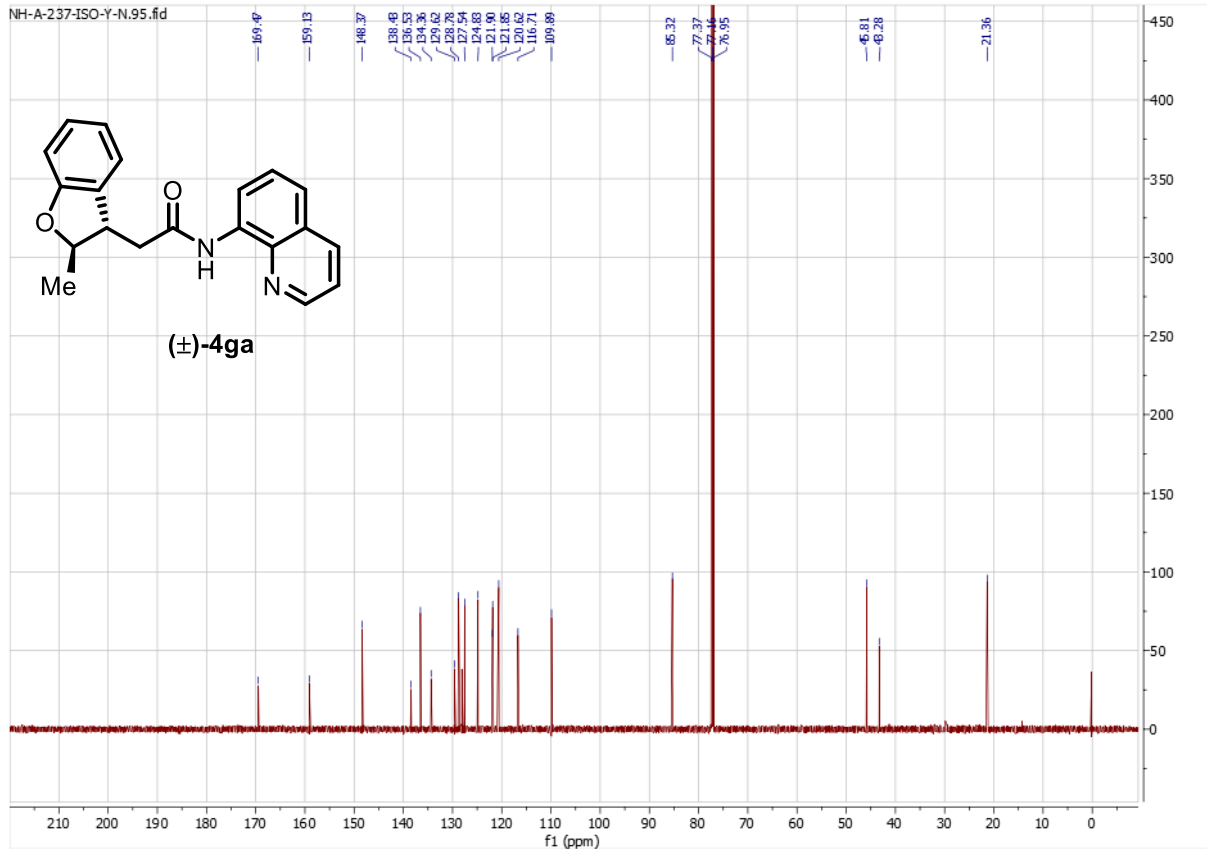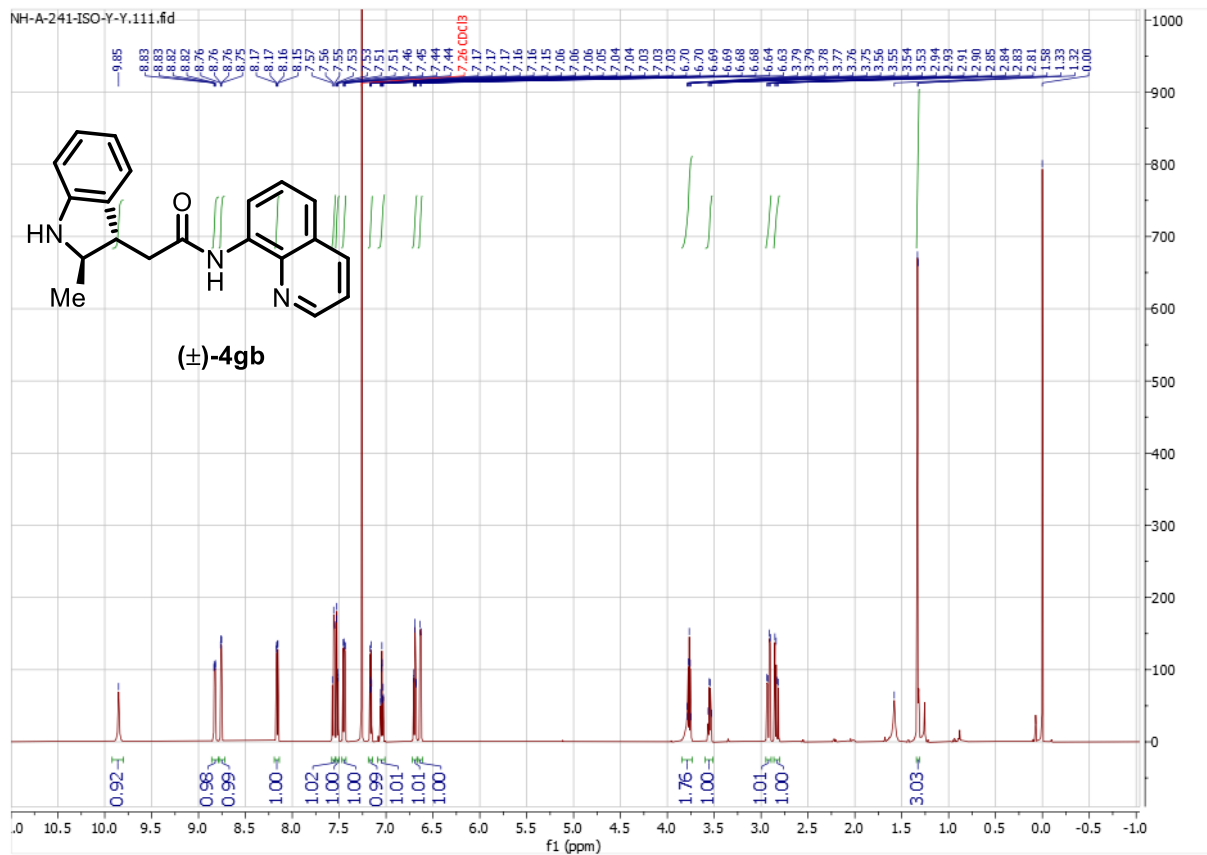

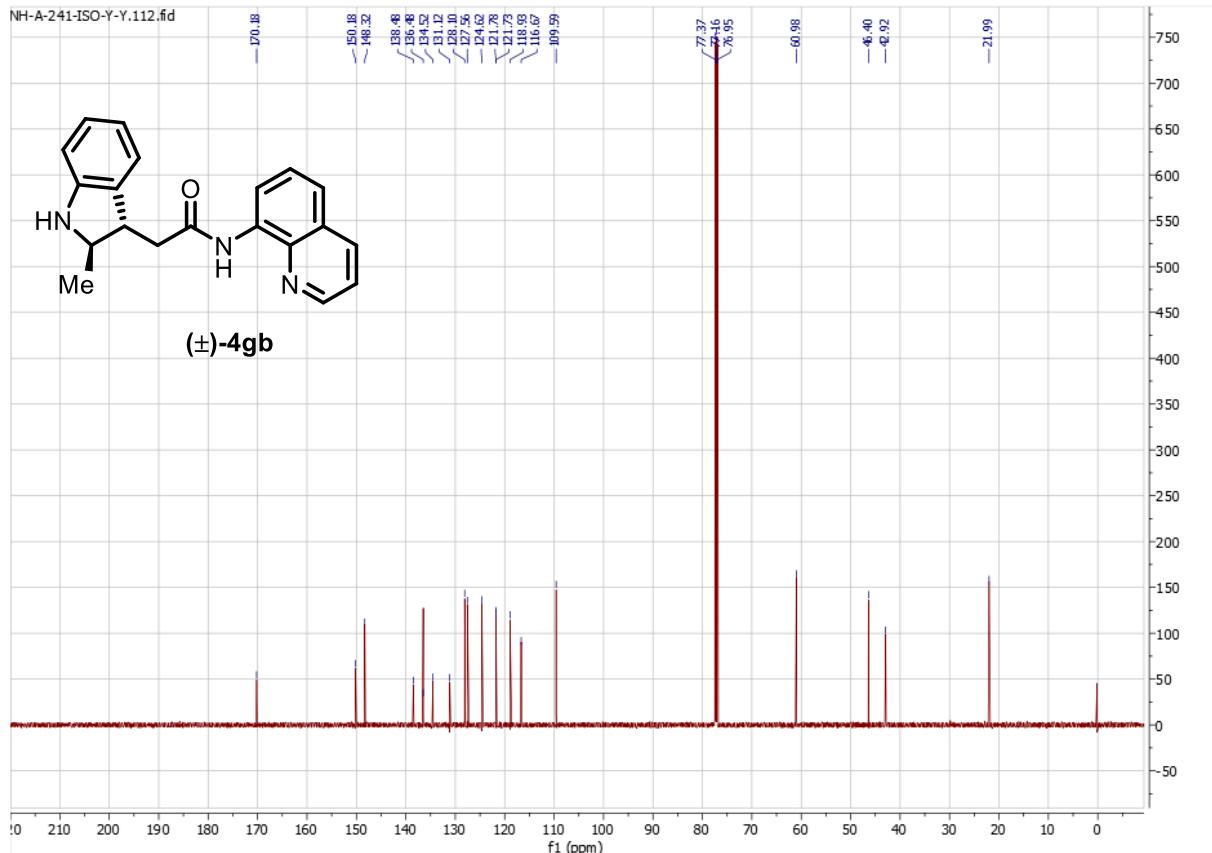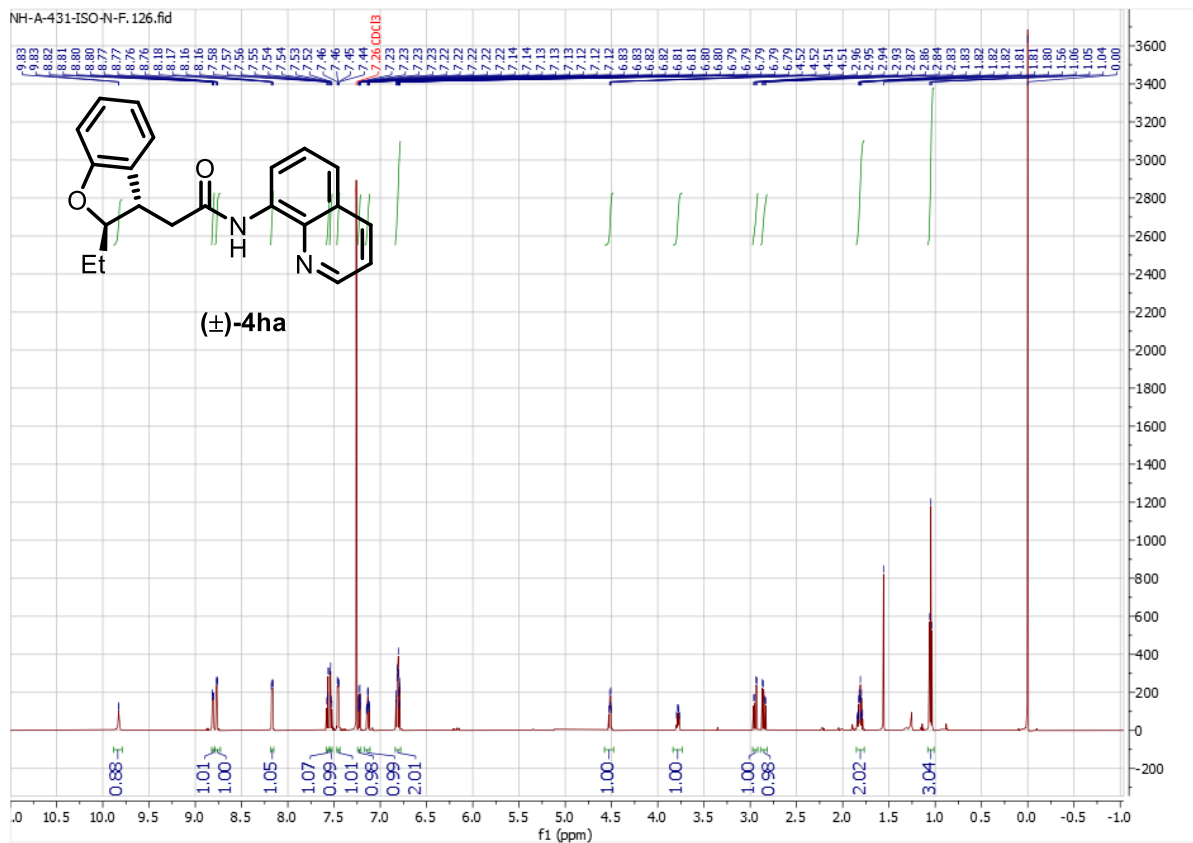

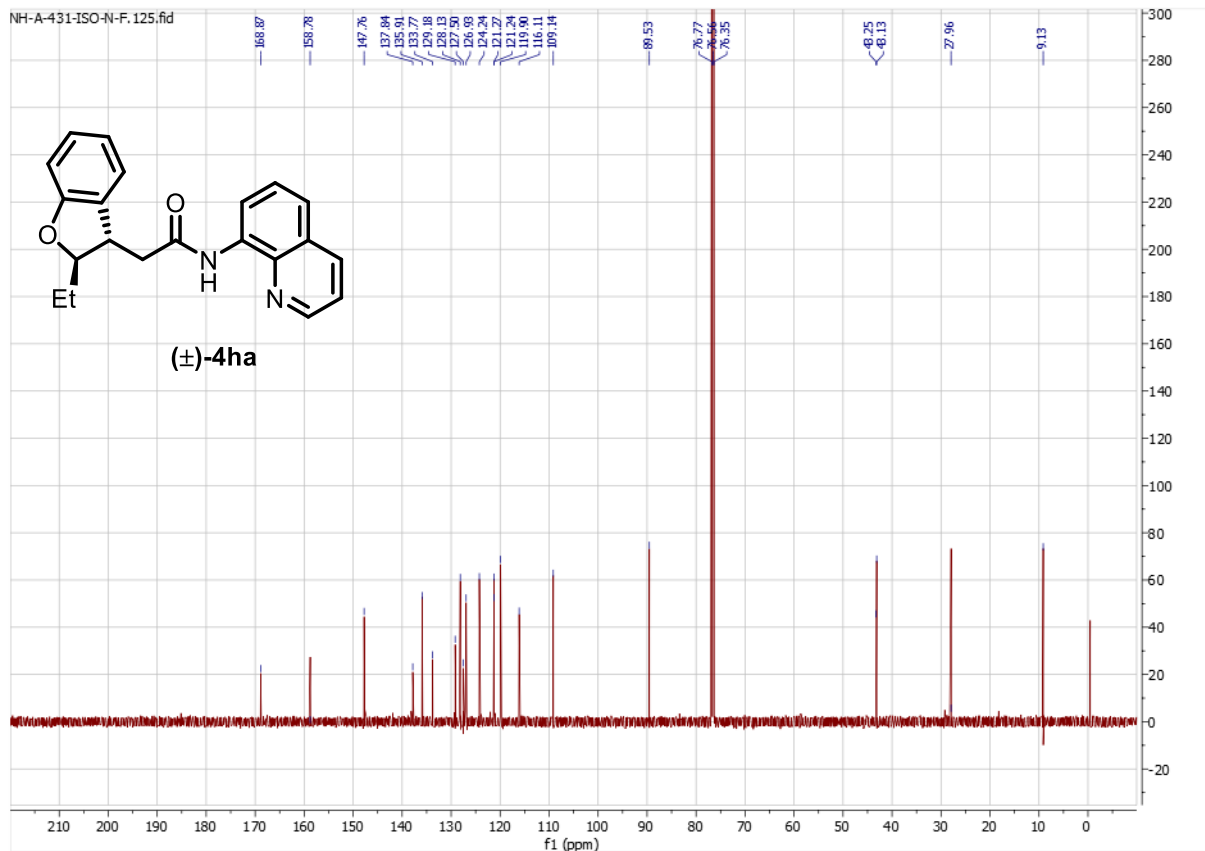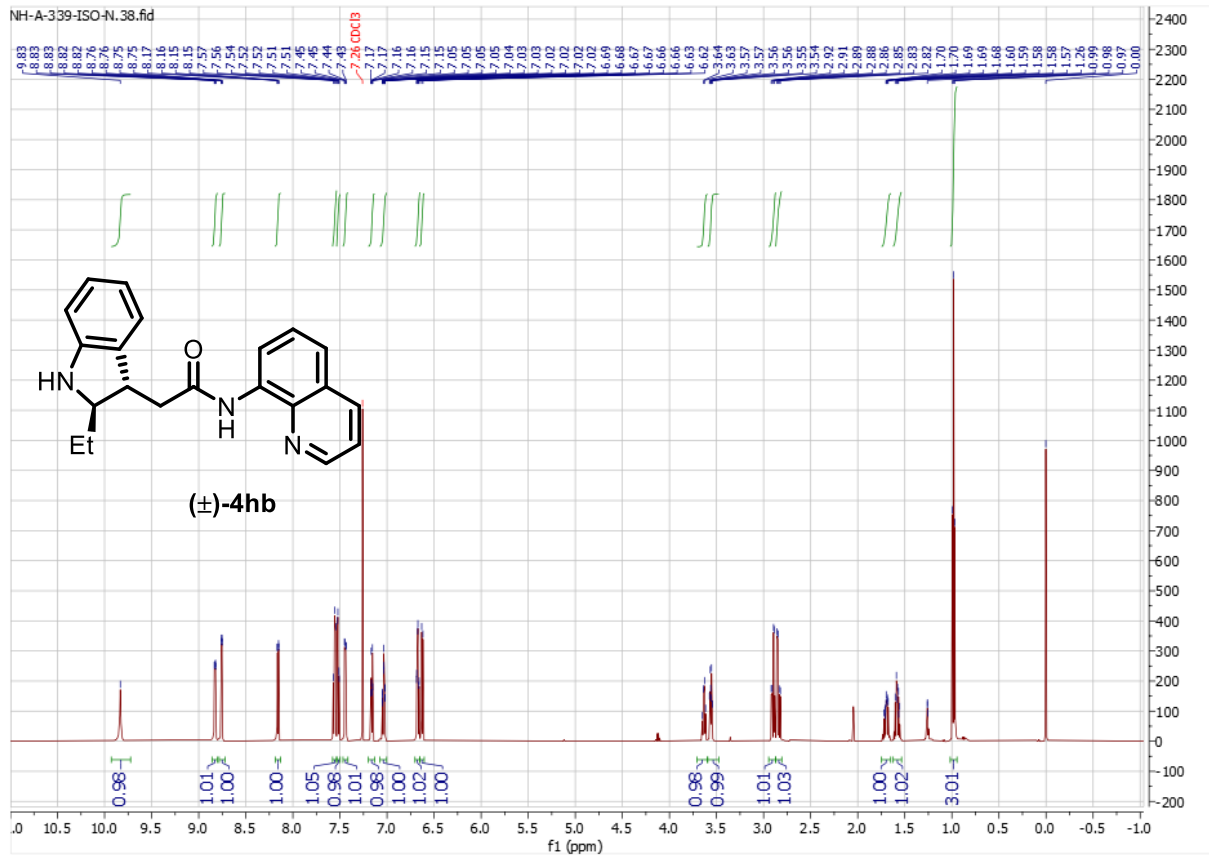

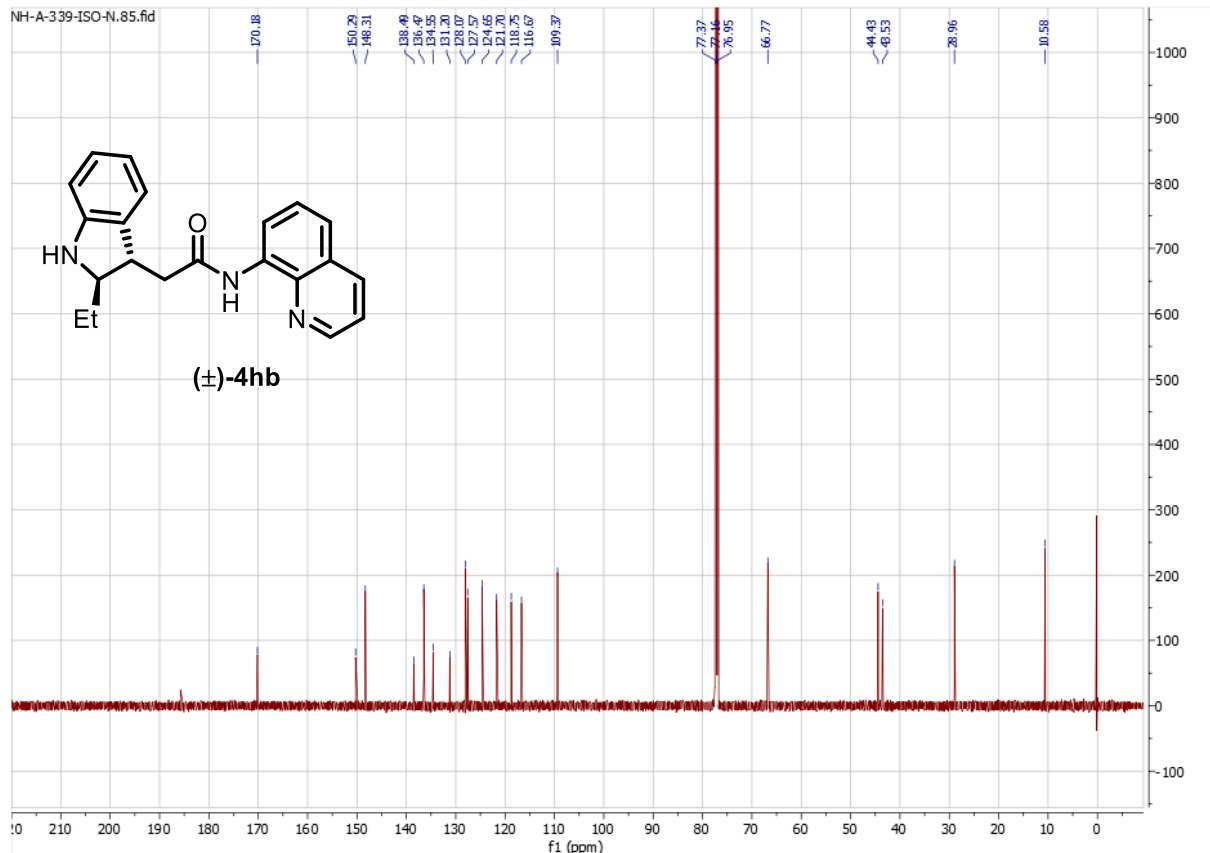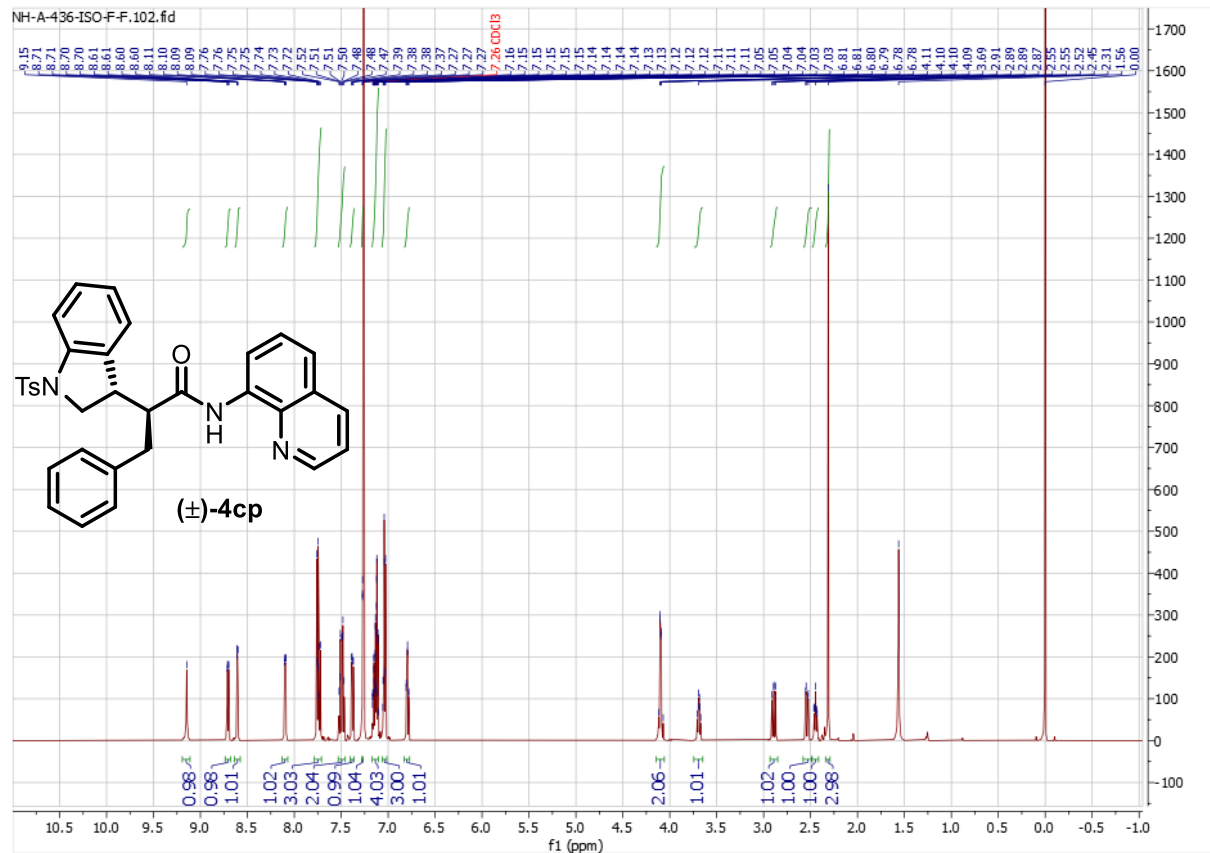

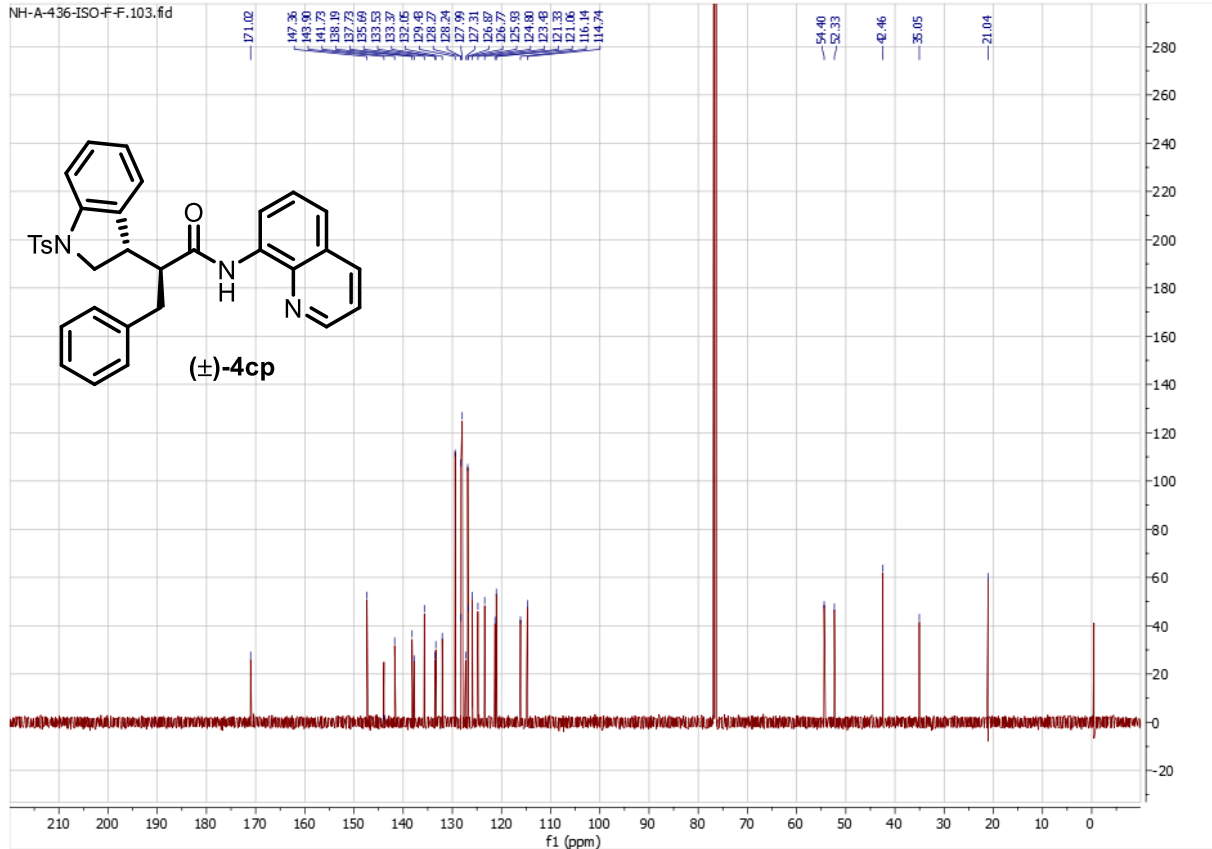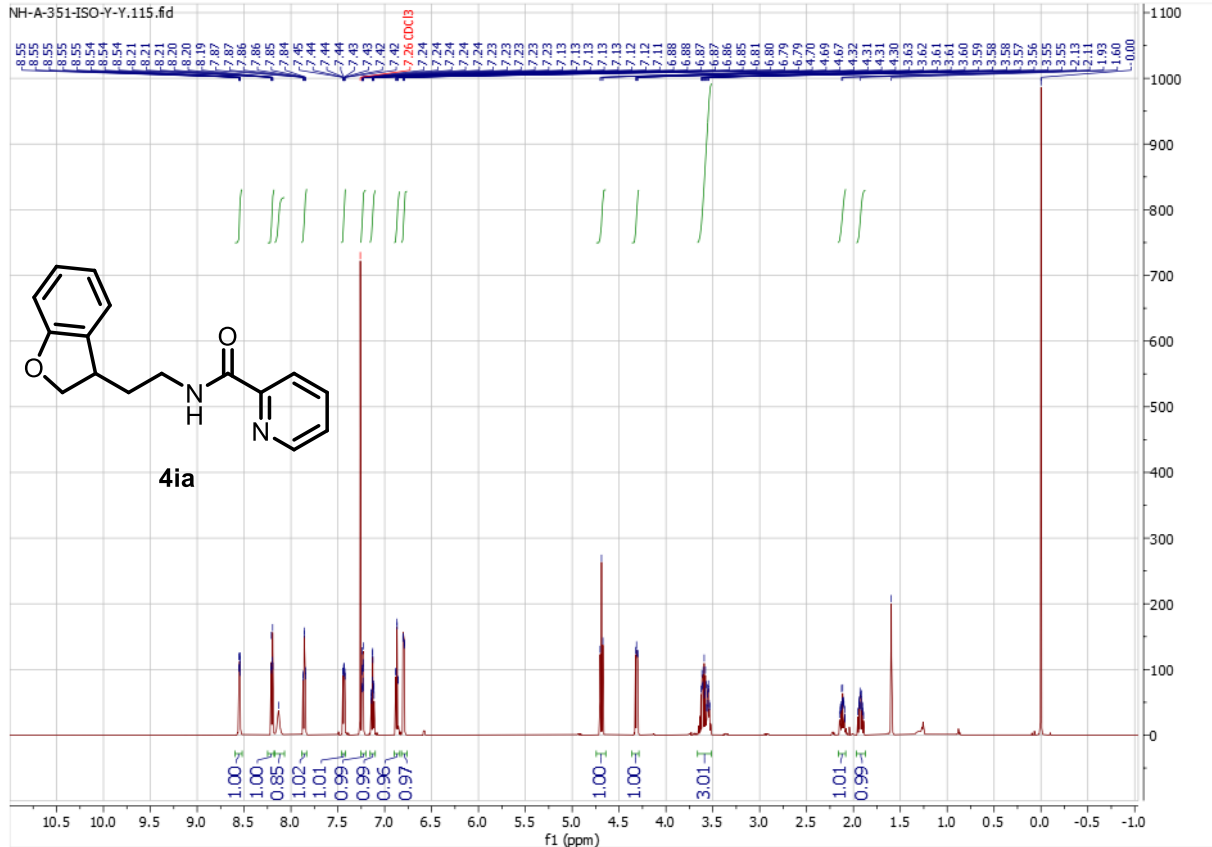

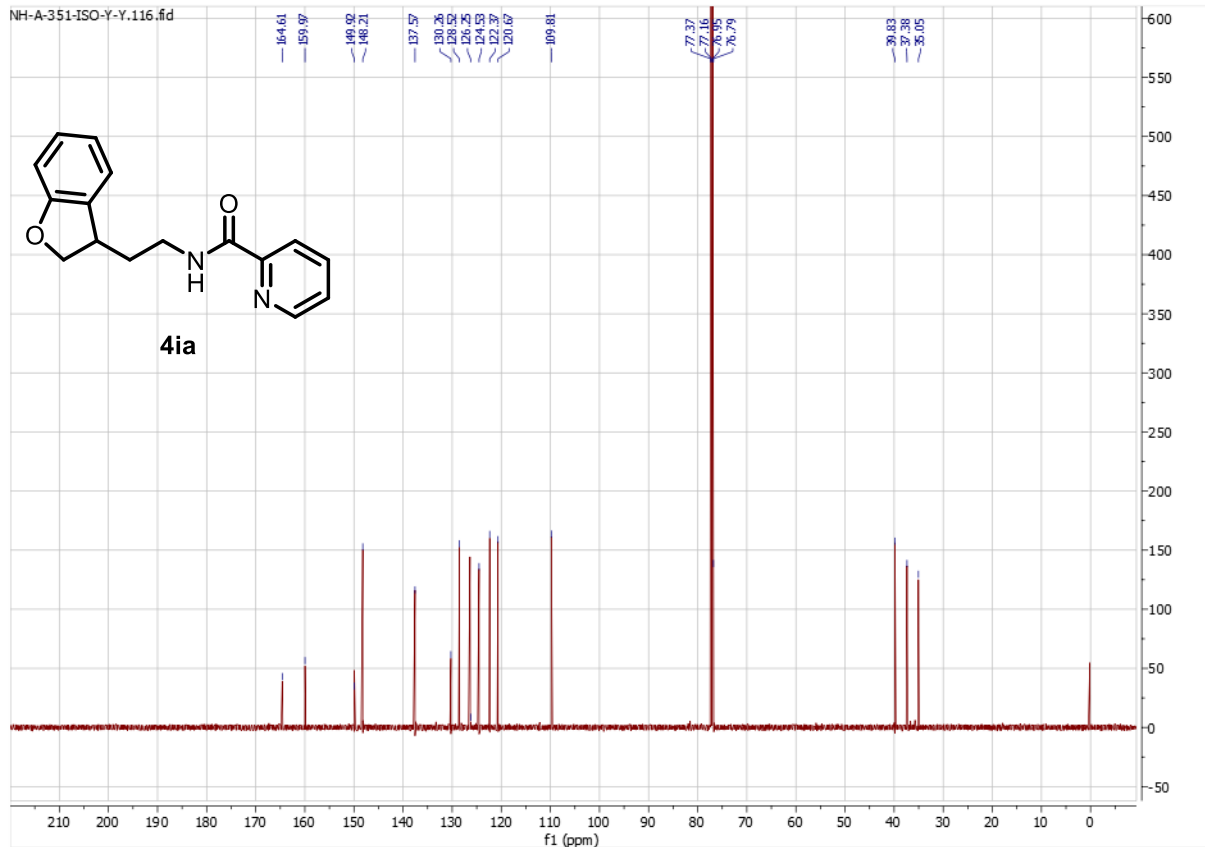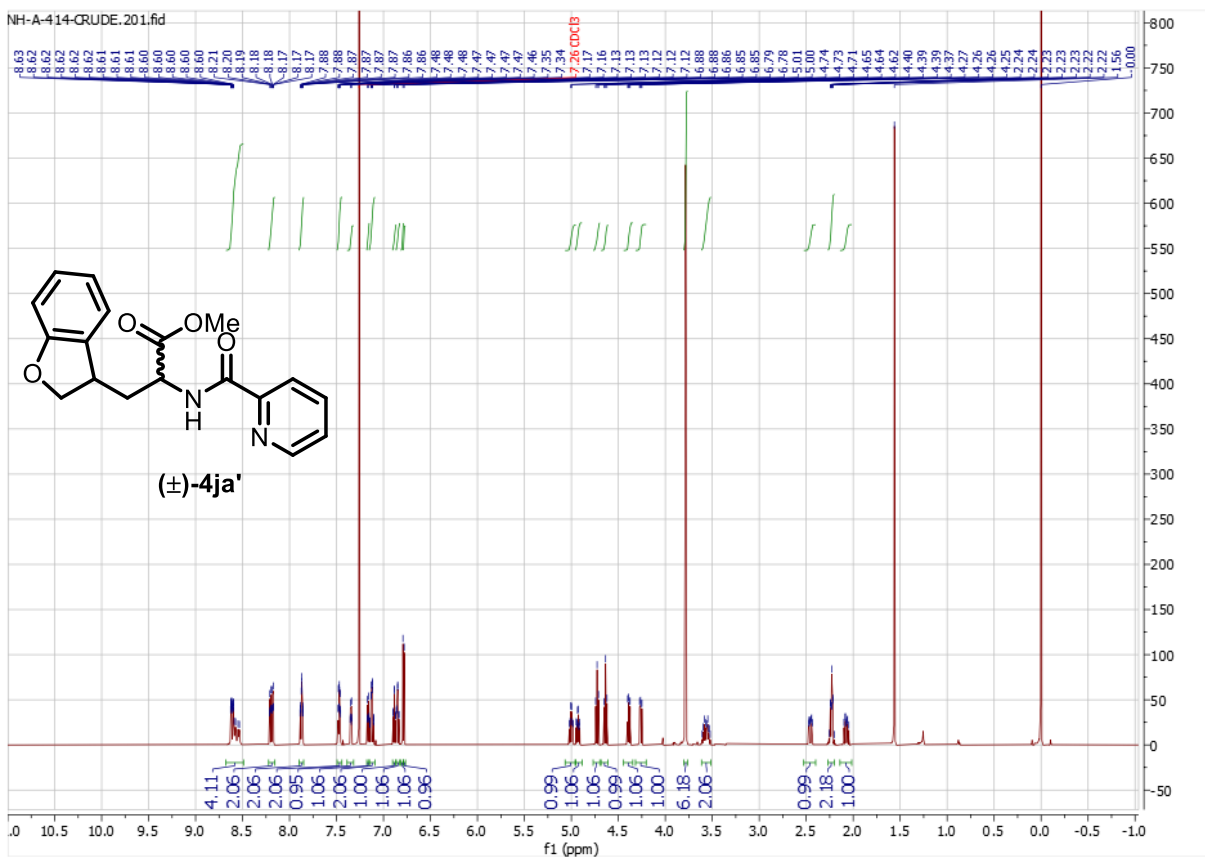

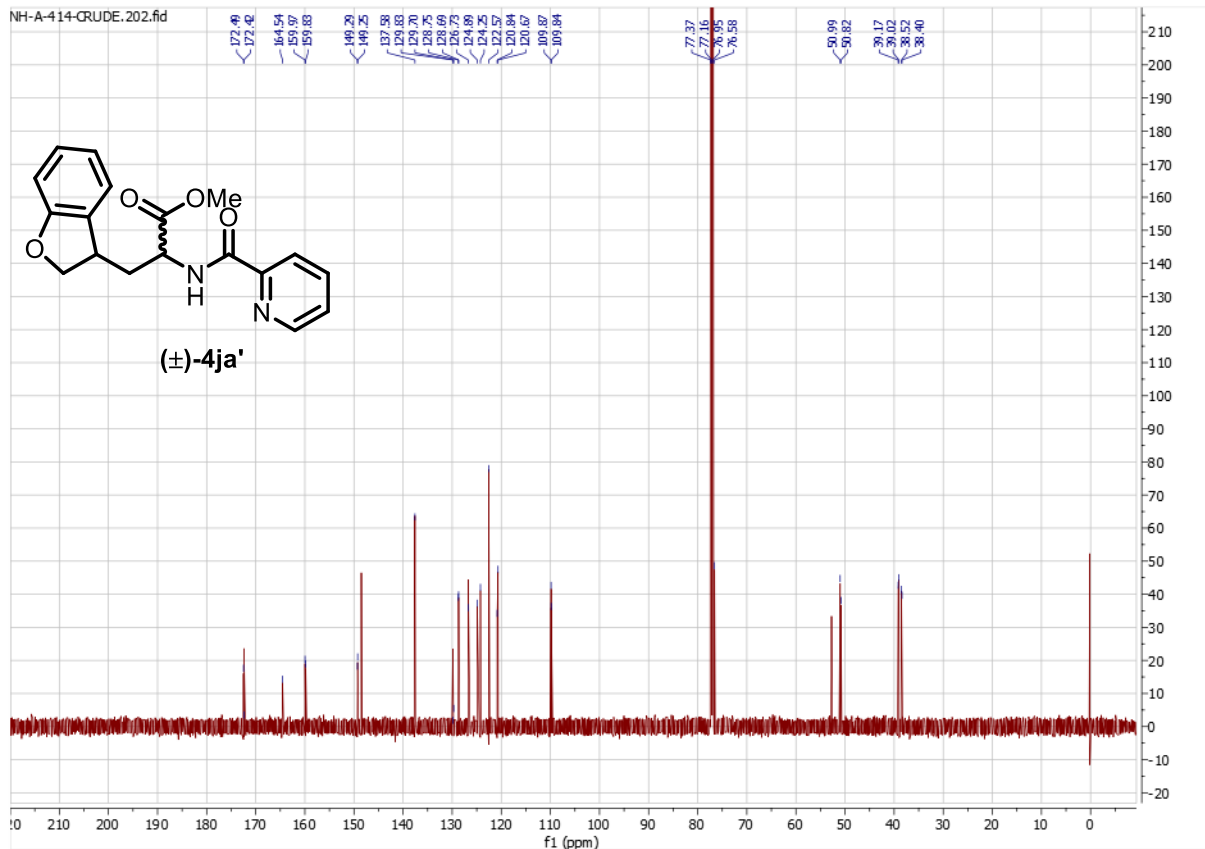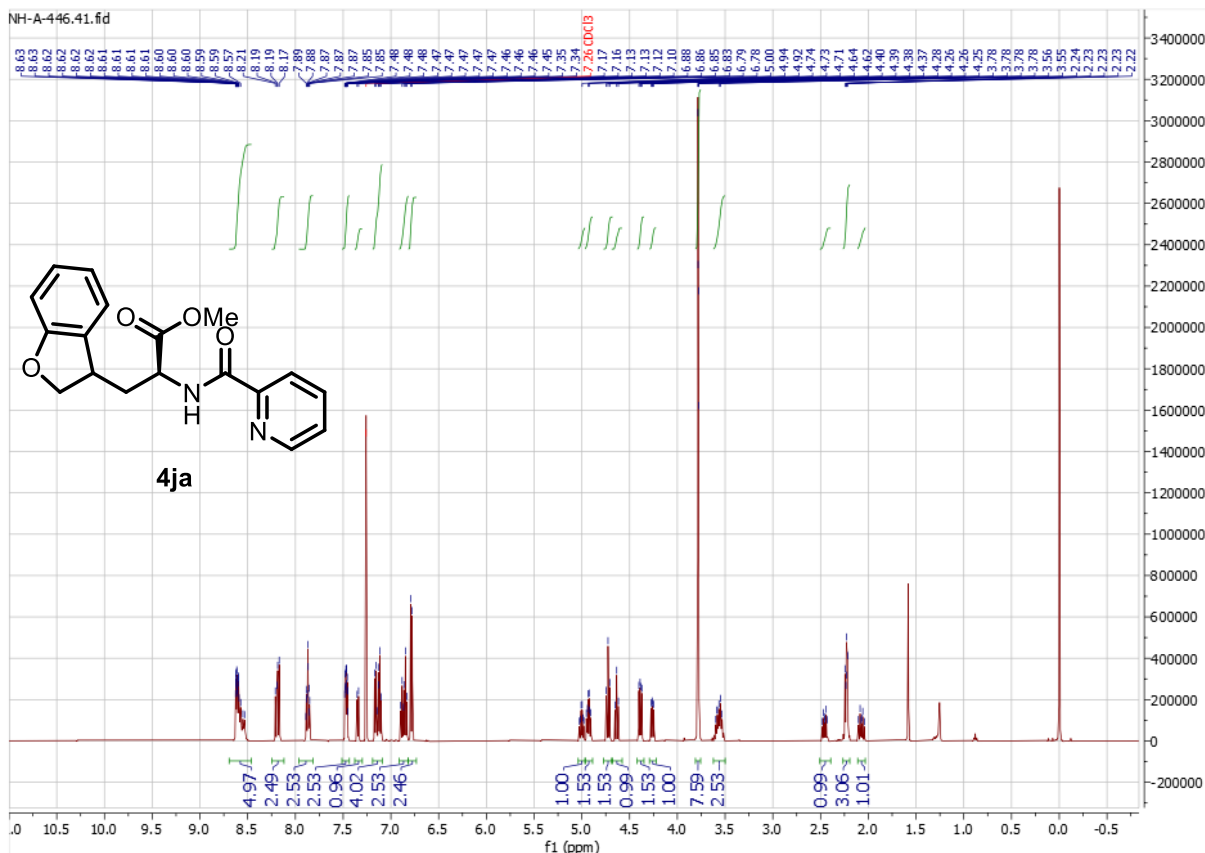

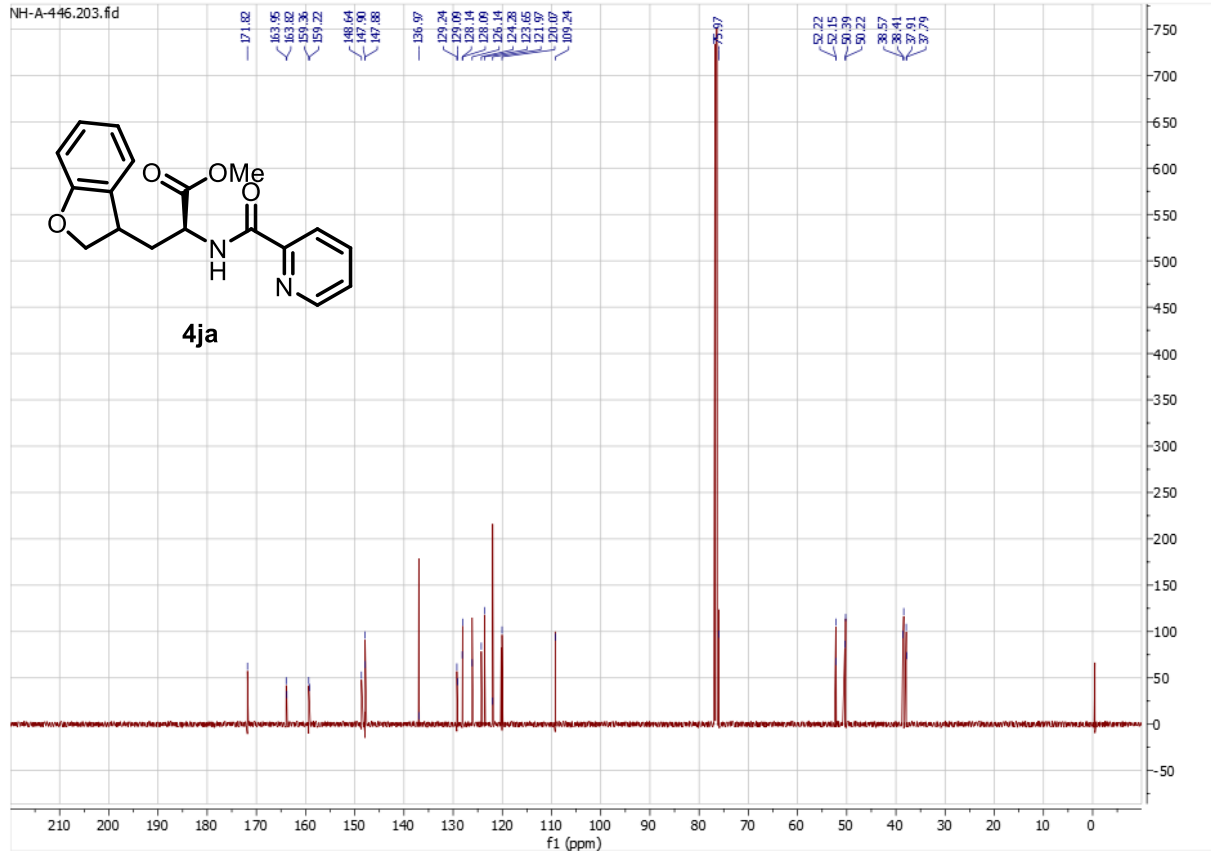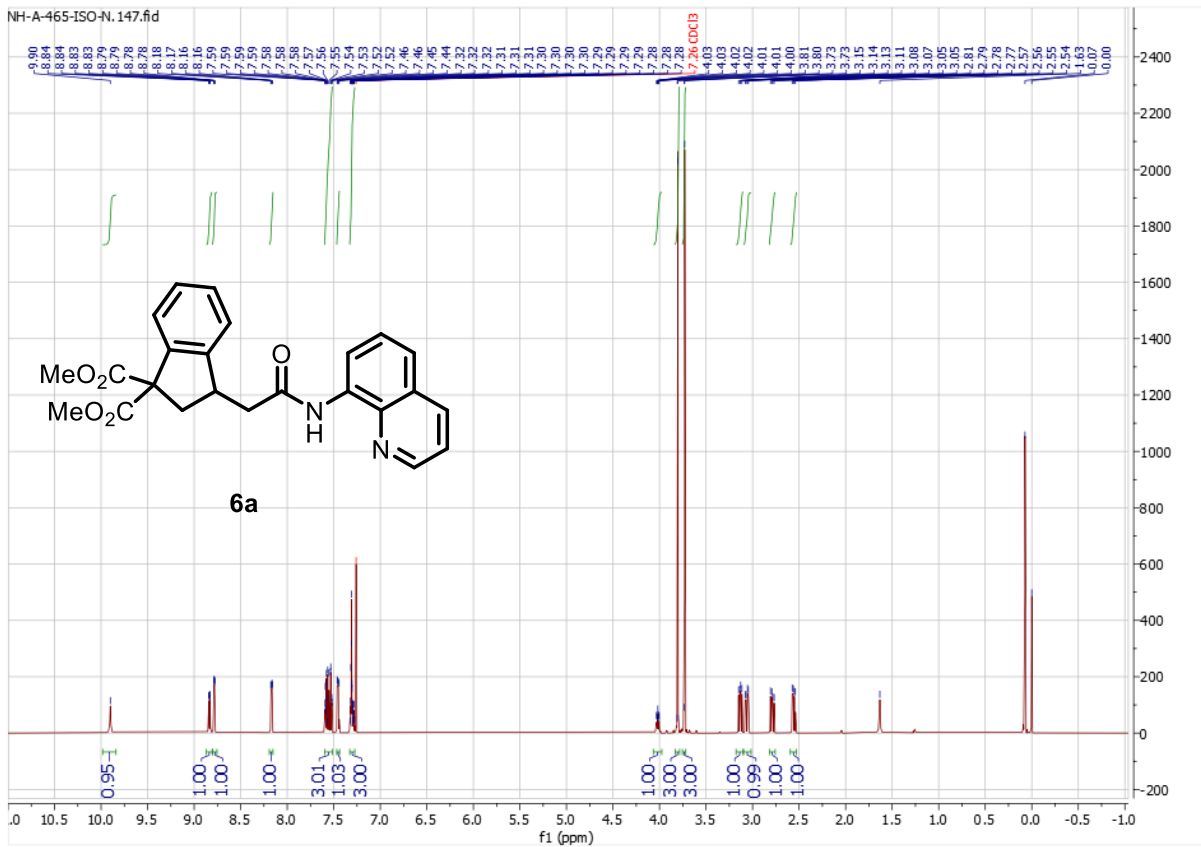



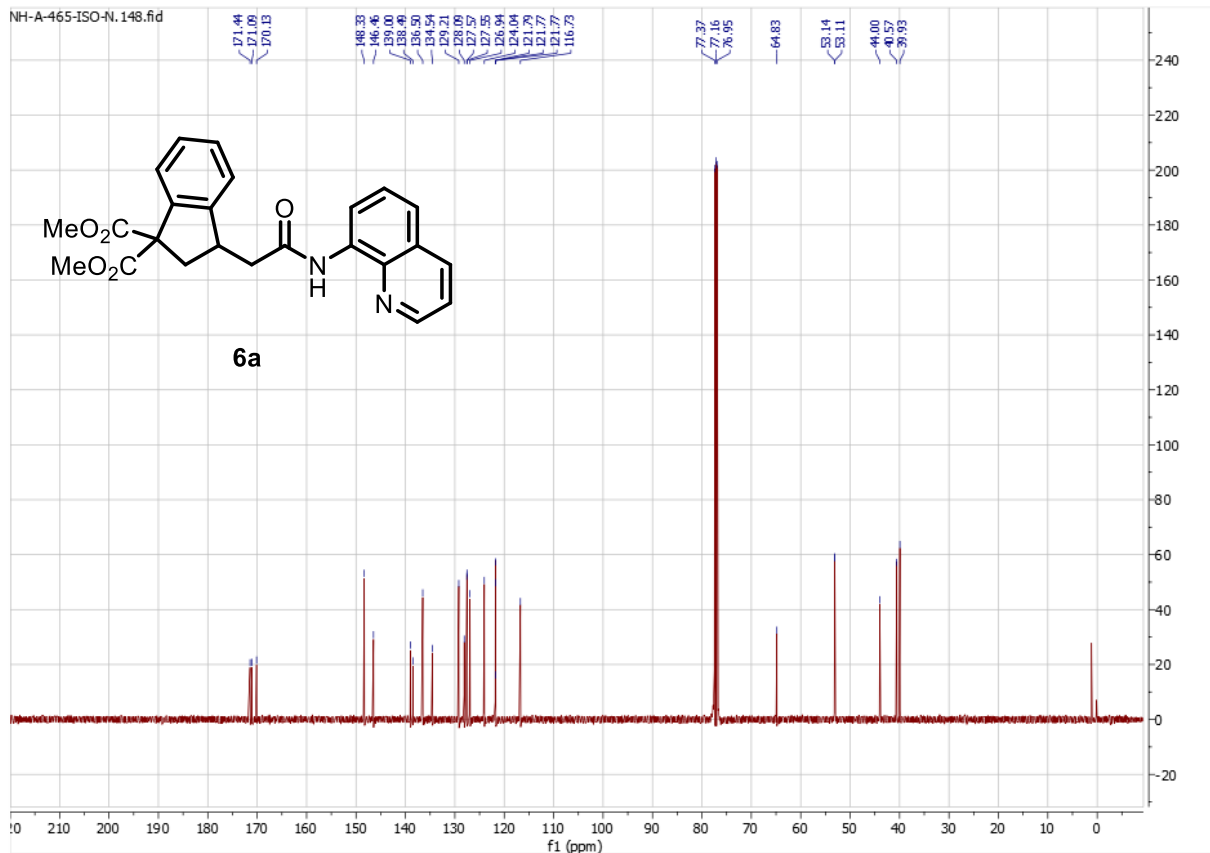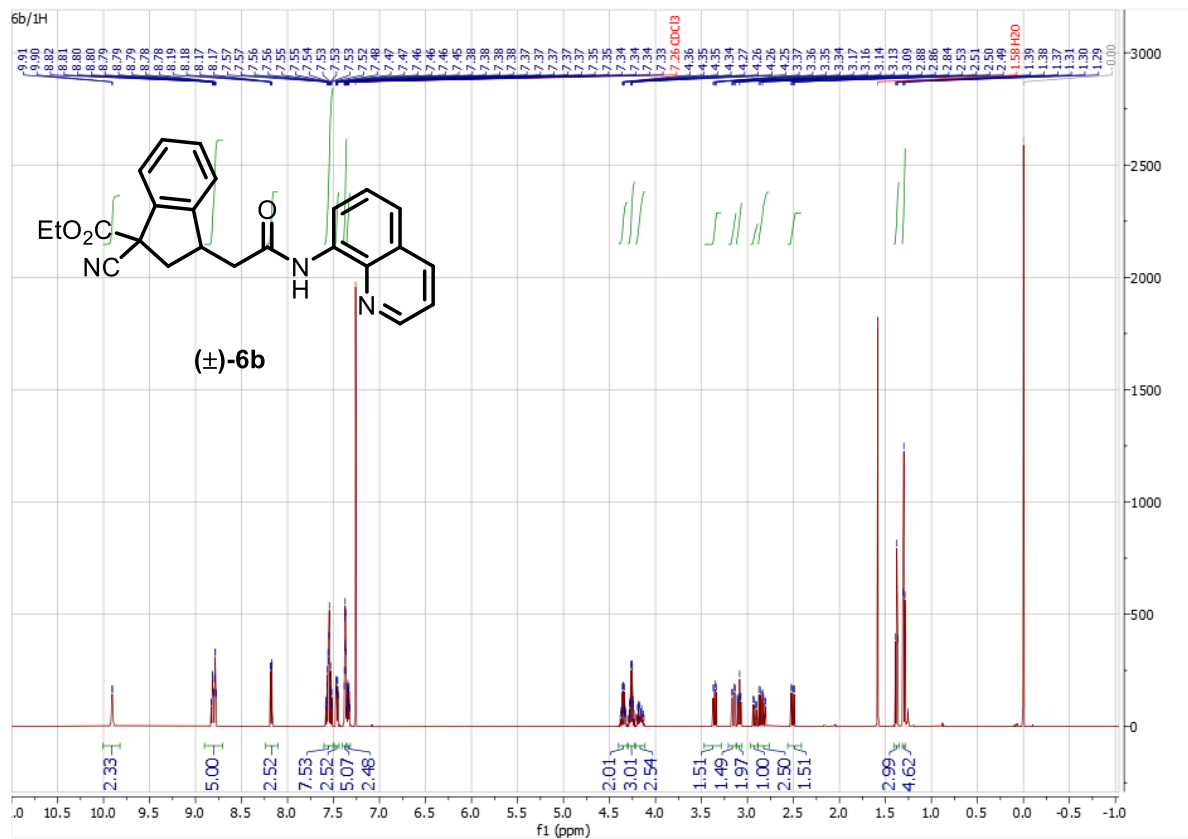

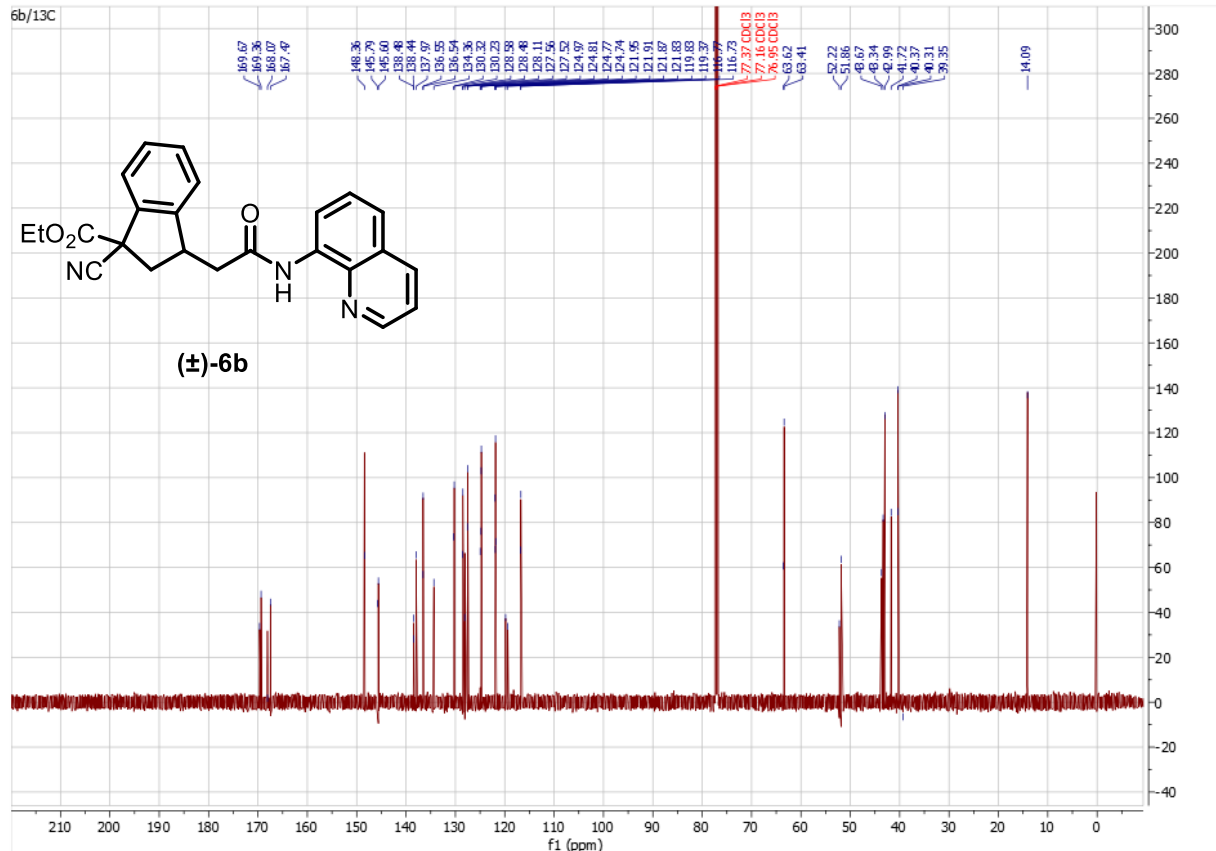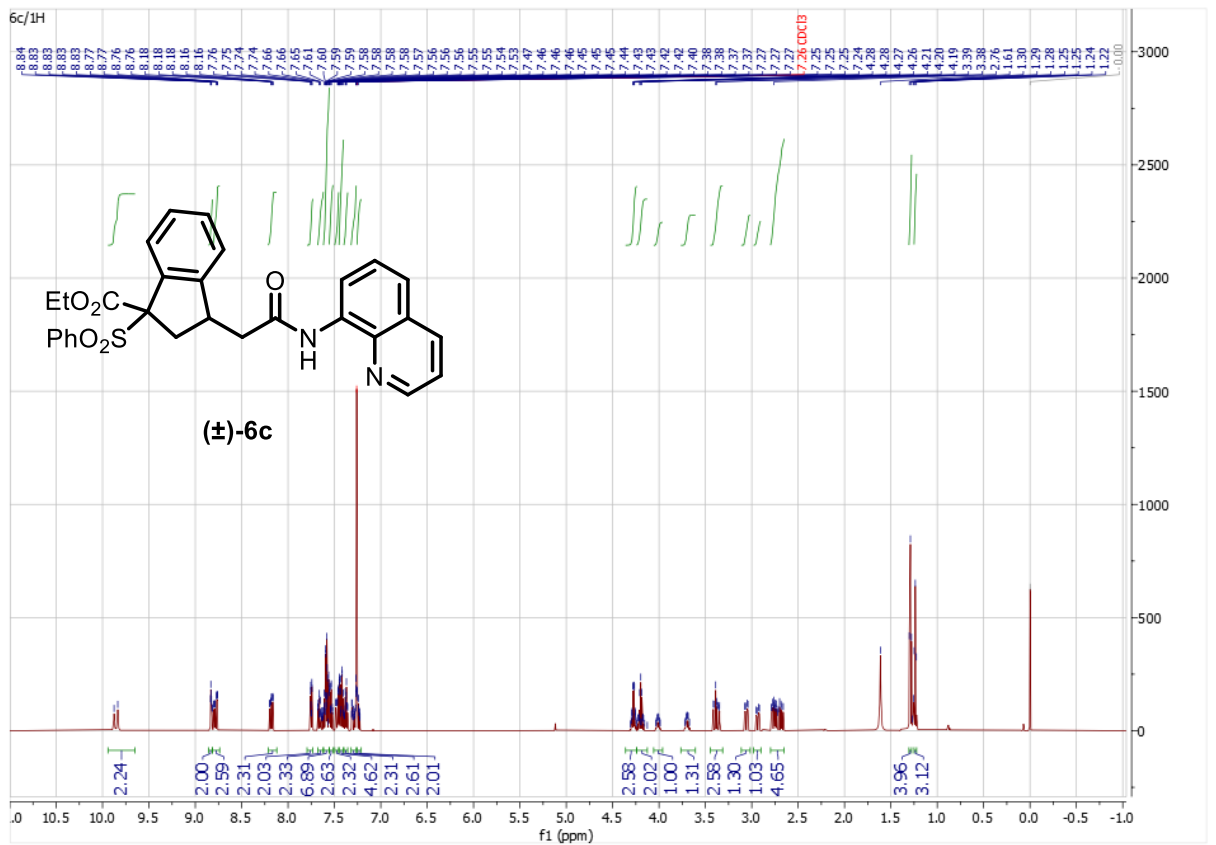

6c/13C

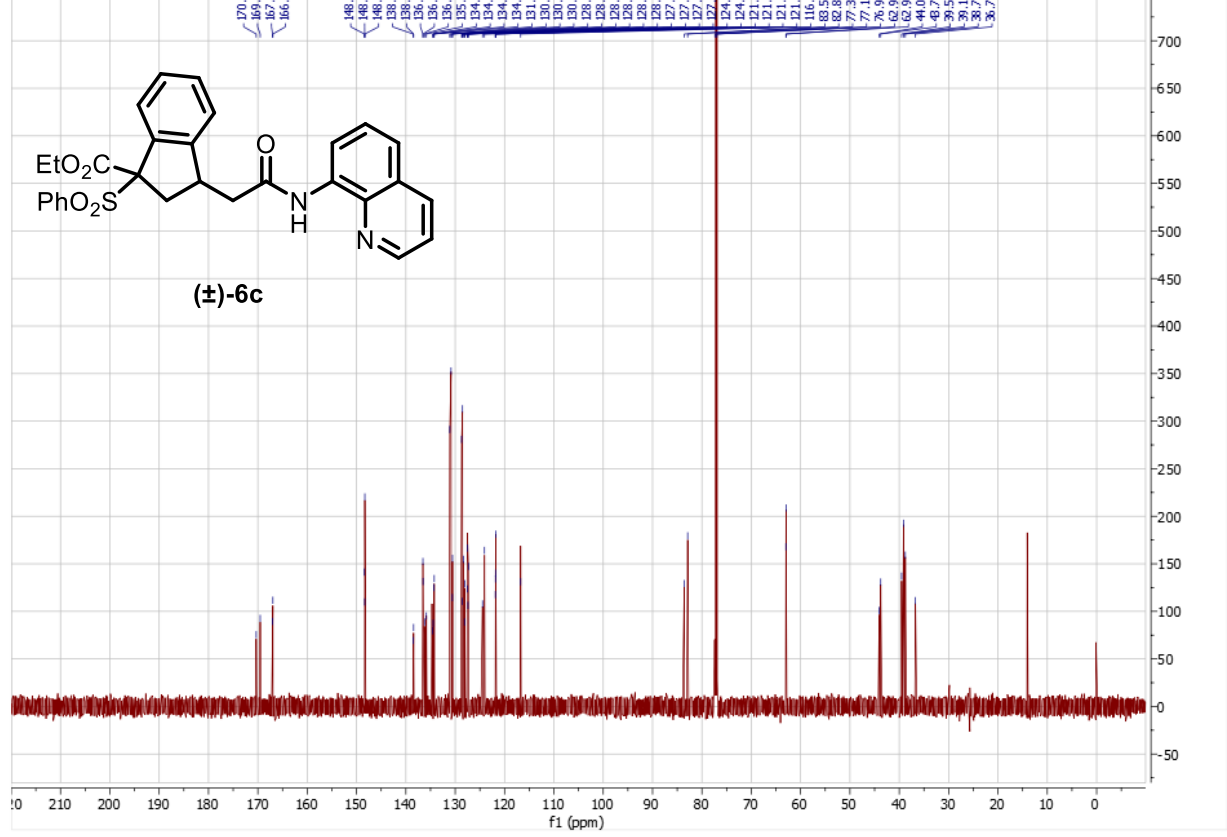

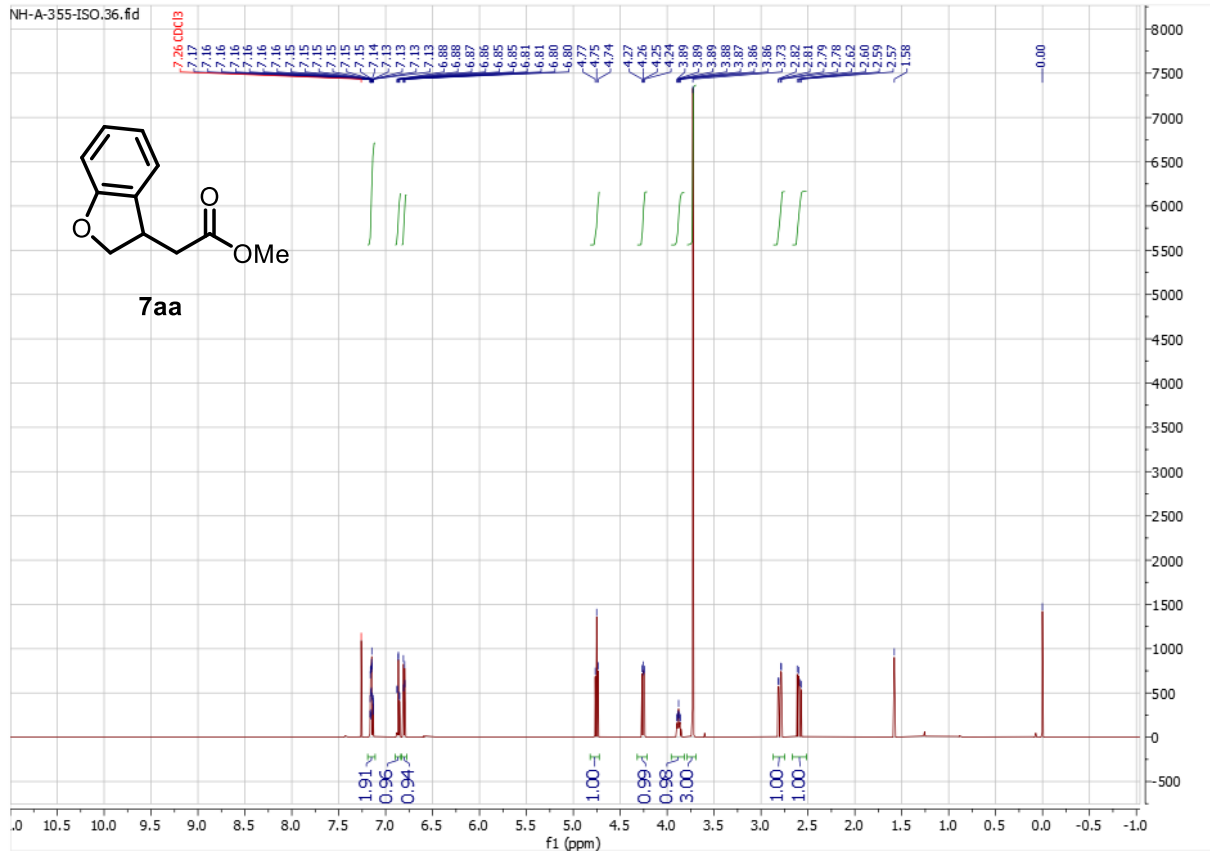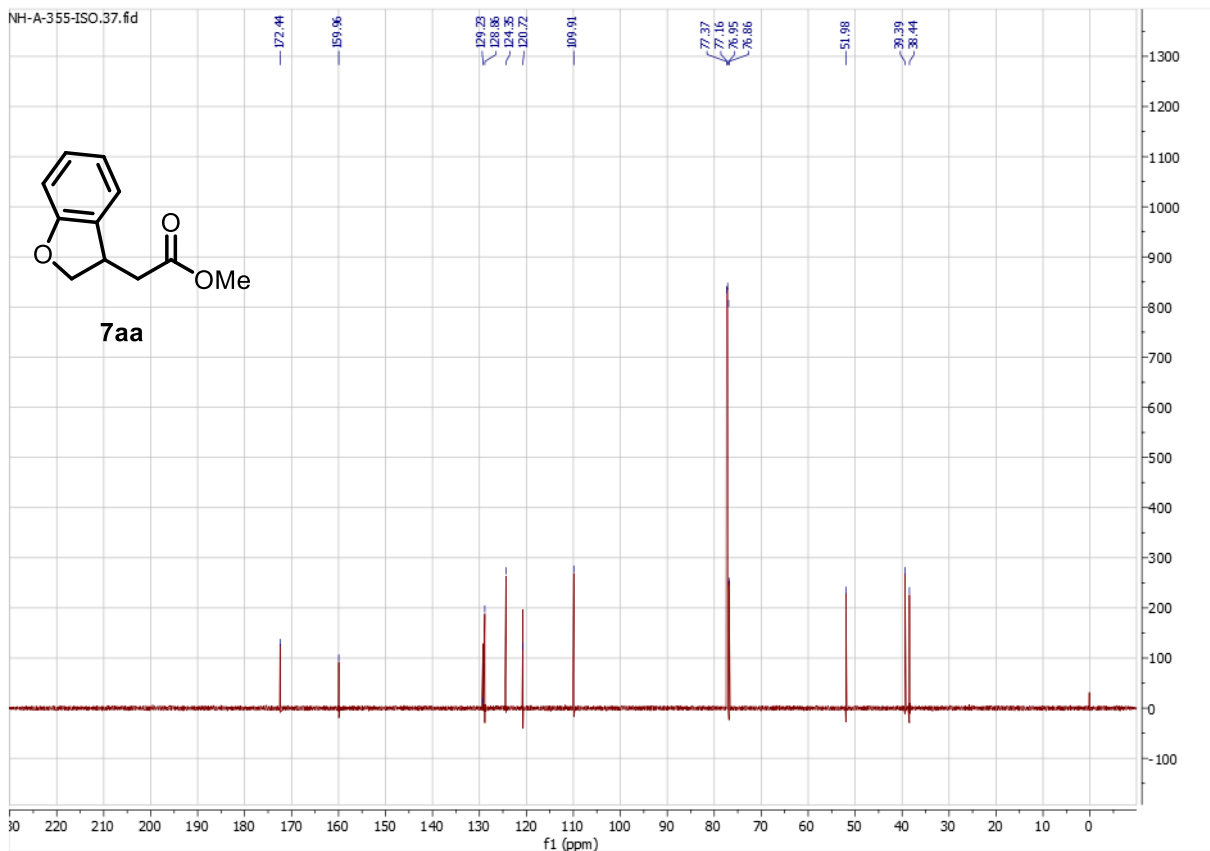

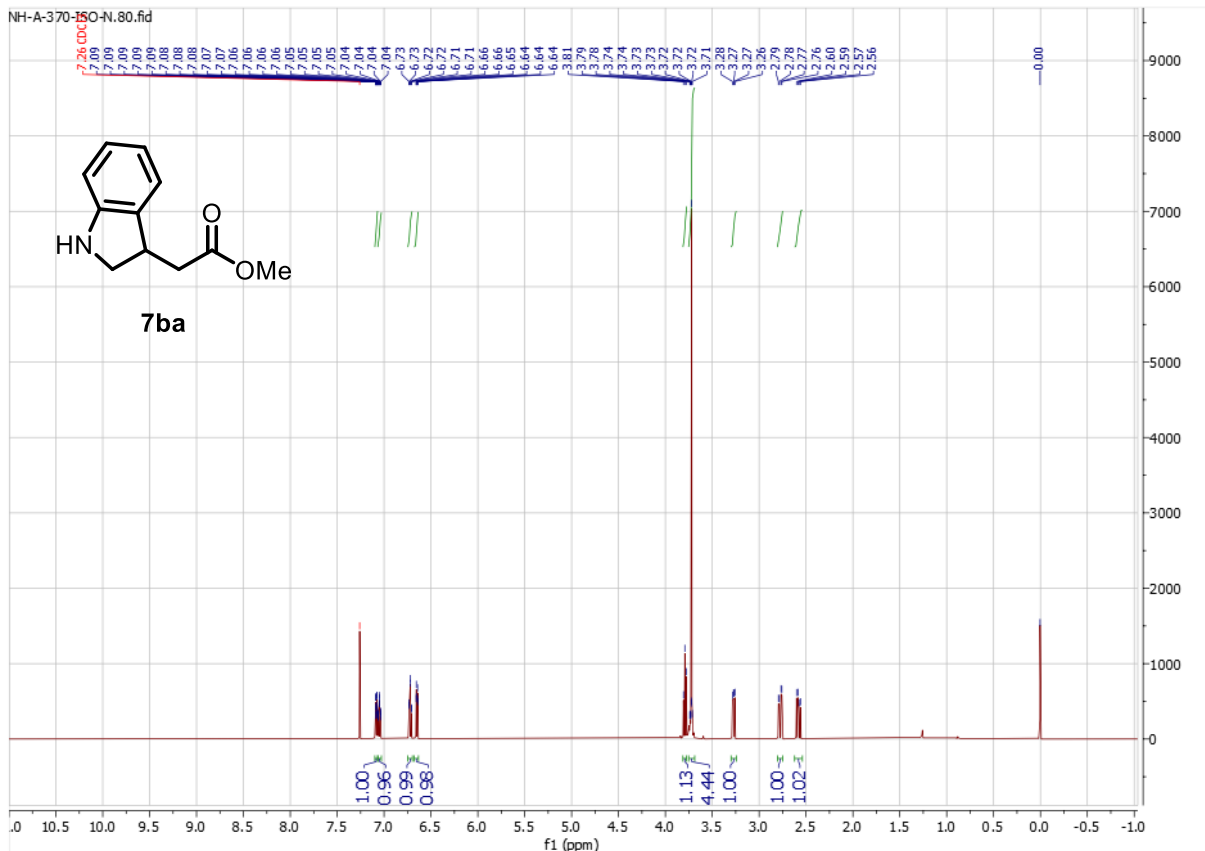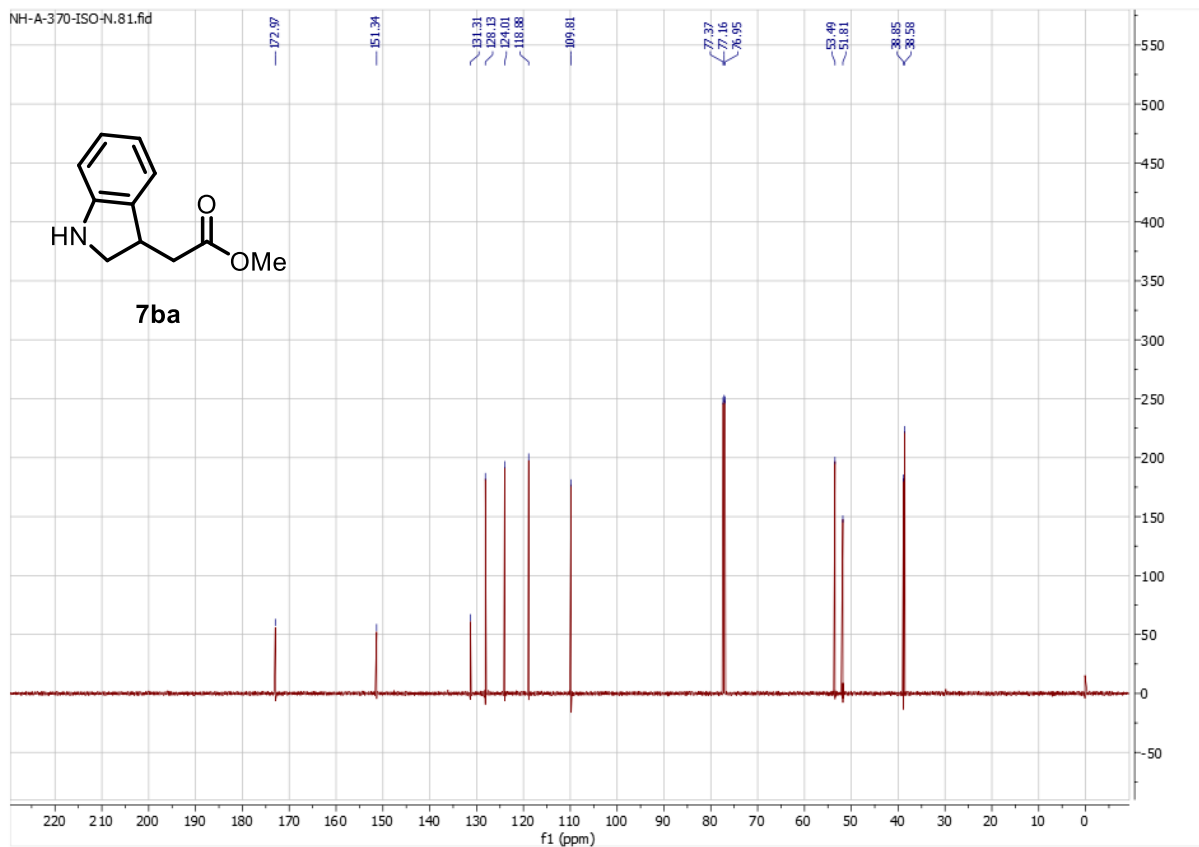

## SUPPLEMENTARY REFERENCES

- (1) Gurak, J. A.; Jr., Yang, K. S.; Liu, Z.; Engle, K. M. Directed, Regiocontrolled Hydroamination of Unactivated Alkenes via Protodepalladation. *J. Am. Chem. Soc.* **138**, 5805–5808 (2016).
- (2) Liu, Z.; Zeng, T.; Yang, K. S.; Engle, K. M.  $\beta,\gamma$ -Vicinal Dicarbofunctionalization of Alkenyl Carbonyl Compounds via Directed Nucleopalladation. *J. Am. Chem. Soc.* **138**, 15122–15125 (2016).
- (3) Liu, Z.; Ni, H.-Q.; Zeng, T.; Engle, K. M. Catalytic Carbo- and Aminoboration of Alkenyl Carbonyl Compounds via Five- and Six-Membered Palladacycles. *J. Am. Chem. Soc.* **140**, 3223–3227 (2018).
- (4) Zeng, T.; Liu, Z.; Schmidt, M. A.; Eastgate, M. D.; Engle, K. M. Directed, Palladium(II)-Catalyzed Intermolecular Aminohydroxylation of Alkenes Using a Mild Oxidation System. *Org. Lett.* **20**, 3853–3857 (2018).
- (5) Liu, Z.; Li, X.; Zeng, T.; Engle, K. M. Directed, Palladium(II)-Catalyzed Enantioselective *anti*-Carboboration of Alkenyl Carbonyl Compounds. *ACS Catal.* **9**, 3260–3265 (2019).
- (6) O’Duill, M. L.; Matsuura, R.; Wang, Y.; Turnbull, J. L.; Gurak, J. A., Jr.; Gao, D.-W.; Lu, G.; Liu, P.; Engle, K. M. Tridentate Directing Groups Stabilize 6-Membered Palladacycles in Catalytic Alkene Hydrofunctionalization. *J. Am. Chem. Soc.* **139**, 15576–15579 (2017).
- (7) Liu, Z.; Wang, Y.; Wang, Z.; Zeng, T.; Liu, P.; Engle, K. M. Catalytic Intermolecular Carboamination of Unactivated Alkenes via Directed Aminopalladation. *J. Am. Chem. Soc.* **139**, 11261–11270 (2017).
- (8) Yang, K. S.; Gurak, J. A., Jr.; Liu, Z.; Engle, K. M. Catalytic, Regioselective Hydrocarbofunctionalization of Unactivated Alkenes with Diverse C–H Nucleophiles. *J. Am. Chem. Soc.* **138**, 14705–14712 (2016).
- (9) Lv, H.; Xiao, L.-J.; Zhao, D.; Zhou, Q.-L. Nickel(0)-Catalyzed Linear-Selective Hydroarylation of Unactivated Alkenes and Styrenes with Aryl Boronic Acids. *Chem. Sci.* **9**, 6839–6843 (2018).
- (10) Zhu, D.; Ma, J.; Luo, K.; Fu, H.; Zhang, L.; Zhu, S. Enantioselective Intramolecular C–H Insertion of Donor and Donor/Donor Carbenes by a Nondiazo Approach. *Angew. Chem., Int. Ed.* **55**, 8452–8456 (2016).
- (11) Bressy, C.; Alberico, D.; Lautens, M. A Route to Annulated Indoles via a Palladium-Catalyzed Tandem Alkylation/Direct Arylation Reaction. *J. Am. Chem. Soc.* **127**, 13148–13149 (2005).
- (12) I. Nakamura, Y. Sato, S. Konta, M. Terada. Platinum-catalyzed consecutive C–N bond formation-[1,3] shift of carbamoyl and ester groups. *Tetrahedron Lett.* **50**, 2075–2077.
- (13) Zhang, X.; Zeng, W.; Yang, Y.; Huang, H.; Liang, Y. Copper-Catalyzed Double C–S Bonds Formation via Different Paths: Synthesis of Benzothiazoles from N-Benzyl-2-iodoaniline and Potassium Sulfide. *Org. Lett.* **16**, 876–879 (2014).
- (14) Yang, W.; Liu, Y.; Zhang, S.; Cai, Q. Copper-Catalyzed Intramolecular Desymmetric Aryl C–O Coupling for the Enantioselective Construction of Chiral Dihydrobenzofurans and Dihydrobenzopyrans. *Angew. Chem., Int. Ed.* **54**, 8805–8808 (2015).
- (15) Tran V. T.; Gurak J. A.; Yang K.; Engle K. M. Activation of Diverse Carbon–Heteroatom and Carbon–Carbon Bonds via Palladium(II)-Catalysed  $\beta$ -X Elimination. *Nat. Chem.* **10**, 1126–1133 (2016).
- (16) CCDC 1999888, 1999889, 2031197 and 2033387 contain the supplementary crystallographic data for this paper. These data can be obtained free of charge from The Cambridge Crystallographic Data Centre via [www.ccdc.cam.ac.uk/data\\_request/cif](http://www.ccdc.cam.ac.uk/data_request/cif).

- (17) Gaussian 16, Revision C.01, Frisch, M. J.; Trucks, G. W.; Schlegel, H. B.; Scuseria, G. E.; Robb, M. A.; Cheeseman, J. R.; Scalmani, G.; Barone, V.; Petersson, G. A.; Nakatsuji, H.; Li, X.; Caricato, M.; Marenich, A. V.; Bloino, J.; Janesko, B. G.; Gomperts, R.; Mennucci, B.; Hratchian, H. P.; Ortiz, J. V.; Izmaylov, A. F.; Sonnenberg, J. L.; Williams-Young, D.; Ding, F.; Lipparini, F.; Egidi, F.; Goings, J.; Peng, B.; Petrone, A.; Henderson, T.; Ranasinghe, D.; Zakrzewski, V. G.; Gao, J.; Rega, N.; Zheng, G.; Liang, W.; Hada, M.; Ehara, M.; Toyota, K.; Fukuda, R.; Hasegawa, J.; Ishida, M.; Nakajima, T.; Honda, Y.; Kitao, O.; Nakai, H.; Vreven, T.; Throssell, K.; Montgomery, J. A., Jr.; Peralta, J. E.; Ogliaro, F.; Bearpark, M. J.; Heyd, J. J.; Brothers, E. N.; Kudin, K. N.; Staroverov, V. N.; Keith, T. A.; Kobayashi, R.; Normand, J.; Raghavachari, K.; Rendell, A. P.; Burant, J. C.; Iyengar, S. S.; Tomasi, J.; Cossi, M.; Millam, J. M.; Klene, M.; Adamo, C.; Cammi, R.; Ochterski, J. W.; Martin, R. L.; Morokuma, K.; Farkas, O.; Foresman, J. B.; Fox, D. J. Gaussian, Inc., Wallingford CT, 2016.
- (18) (a) Lee, C.; Yang, W.; Parr, R. G. Development of the Colle-Salvetti Correlation-Energy Formula into a Functional of the Electron Density. *Phys. Rev. B* **37**, 785–789 (1988); (b) Becke, A. D. Density-Functional Thermochemistry. III. The Role of Exact Exchange.” *J. Chem. Phys.* **98**, 5648–5652 (1993).
- (19) Grimme, S.; Antony, S.; Ehrlich, S.; Krieg, S. “A Consistent and Accurate *Ab Initio* Parametrization of Density Functional Dispersion Correction (DFT-D) for the 94 Elements H-Pu”, *J. Chem. Phys.* **132**, 154104 (2010).
- (20) Marenich, A. V.; Cramer, C. J.; Truhlar, D. G. Universal Solvation Model Based on Solute Electron Density and on a Continuum Model of the Solvent Defined by the Bulk S-95 Dielectric Constant and Atomic Surface Tensions. *J. Phys. Chem. B* **113**, 6378–6396 (2009).
- (21) Zhao, Y.; Truhlar, D. G. The M06 Suite of Density Functionals for Main Group Thermochemistry, Thermochemical Kinetics, Noncovalent Interactions, Excited States, and Transition Elements: Two New Functionals and Systematic Testing of Four M06-Class Functionals and 12 Other Functionals. *Theor. Chem. Acc.* **120**, 215–241 (2008).
- (22) Ribeiro, R. F.; Marenich, A. V.; Cramer, C. J.; Truhlar, D. G. Use of Solution-Phase Vibrational Frequencies in Continuum Models for the Free Energy of Solvation. *J. Phys. Chem. B* 14556–14562 (2011).
- (23) Mammen, M.; Shakhnovich, E. I.; Deutch, J. M.; Whitesides, G. M. Estimating the Entropic Cost of Self-Assembly of Multiparticle Hydrogen-Bonded Aggregates Based on the Cyanuric Acid-Melamine Lattice. *J. Org. Chem.* **63**, 3821–3830 (1998).
- (24) Zhang, D.; Yum, E. K.; Liu, Z.; Larock, R. C. Synthesis of Indenes by the Palladium-Catalyzed Carboannulation of Internal Alkynes. *Org. Lett.* **7**, 4963 (2005).
