# Supplementary material for: Anti-selective [3+2] (Hetero)annulation of non-conjugated alkenes via directed nucleopalladation
Source: PubMed Central journal article supplement (PMC7755910; doi:10.1038/s41467-020-20182-4), 2020-12-22
Supplement: 41467_2020_20182_MOESM3_ESM.pdf [file 41467_2020_20182_MOESM3_ESM.pdf]

## Description of Additional Supplementary Files

File Name: Supplementary Data 1

Description: DFT calculations on the reaction of alkene **1a** and iodophenol **2aa**
